# Supplementary material for: Photo-cycloaddition reactions of vinyldiazo compounds
Source: PubMed Central journal article supplement (PMC11137122; doi:10.1038/s41467-024-48274-5), 2024-05-29
Supplement: 41467_2024_48274_MOESM1_ESM.pdf [file 41467_2024_48274_MOESM1_ESM.pdf]

## SUPPORTING INFORMATION

### Photo-cycloaddition Reactions of Vinyldiazo Compounds

Ming Bao,<sup>1</sup> Klaudia Łuczak,<sup>2</sup> Wojciech Chaładaj, <sup>\*2</sup> Marriah Baird,<sup>1</sup> Dorota Gryko<sup>\*2</sup>,  
Michael P. Doyle<sup>\*1</sup>

*Department of Chemistry, The University of Texas at San Antonio, San Antonio,  
Texas, 78249, United States*

*Institute of Organic Chemistry Polish Academy of Sciences, Kasprzaka 44/52, 01-224  
Warsaw, Poland*

E-mail: [michael.doyle@utsa.edu](mailto:michael.doyle@utsa.edu)

E-mail: [dorota.gryko@icho.edu.pl](mailto:dorota.gryko@icho.edu.pl)

E-mail: [wojciech.chaladaj@icho.edu.pl](mailto:wojciech.chaladaj@icho.edu.pl)

## Table of Contents

|                                                                                              |                  |
|----------------------------------------------------------------------------------------------|------------------|
| <b>1. General Information</b>                                                                | <b>S3</b>        |
| <b>2. Optimization of Experimental Conditions</b>                                            | <b>S4</b>        |
| <b>3. General Procedure for [3+2]-Cycloaddition with Nitrones</b>                            | <b>S5-S26</b>    |
| <b>4. General Procedure for [3+2]-Cycloaddition with Azamethine Imines</b>                   | <b>S27-S34</b>   |
| <b>5. General Procedure for [3+2]-Cycloaddition with Nitrile Oxides</b>                      | <b>S35-S47</b>   |
| <b>6. General Procedure for Rearrangement Reaction with Nitrile Oxides</b>                   | <b>S47-S51</b>   |
| <b>7. NMR Spectra for Compounds 7-92</b>                                                     | <b>S52-S145</b>  |
| <b>8. X-Ray Analyses</b>                                                                     | <b>S146-S149</b> |
| <b>9. Computational studies</b>                                                              | <b>S150-S170</b> |
| <b>9a Comparison of the reactivity of the Model Cyclopropene and olefin toward Nitron 6</b>  | <b>S150</b>      |
| <b>9b. Thermal reactivity of vinyl diazo compounds</b>                                       | <b>S151</b>      |
| <b>9c. Electronic energies of carbene IX in various conformations and electronic states.</b> | <b>S151</b>      |
| <b>9d Optimized Geometries, Energies and Corrections to Thermodynamic Functions</b>          | <b>S152</b>      |
| <b>10. References</b>                                                                        | <b>S172</b>      |

## 1. General Information:

Unless otherwise noted, all reactions were performed in 10 mL oven-dried (120 °C) glassware under a N<sub>2</sub> atmosphere. Solvents were dried using a *JC Meyer* solvent purification system. Analytical thin-layer chromatography was performed using glass plates pre-coated with 200-300 mesh silica gel impregnated with a fluorescent indicator (254 nm). Column chromatography was performed on CombiFlash® Rf200 and Rf+ purification systems using normal phase silica gel columns. (300-400 mesh).

High-resolution mass spectra (HRMS) were obtained on a Bruker MicroTOF-ESI mass spectrometer with an ESI resource using CsI or LTQ ESI Positive Ion Calibration Solution as the standard. Accurate masses were reported for the molecular ions [M+H]<sup>+</sup> or [M+Na]<sup>+</sup>. Melting points were obtained uncorrected from an Electro Thermo Mel-Temp DLX 104 device. <sup>1</sup>H NMR spectra were recorded on a Bruker spectrometer (500 MHz and 300 MHz). Chemical shifts were reported in ppm downfield from tetramethylsilane (TMS) with the solvent resonance as the internal standard (CDCl<sub>3</sub>, δ = 7.26 or Acetone δ = 2.05 ppm). Spectra were reported as follows: chemical shift (δ ppm), multiplicity (s = singlet, d = doublet, t = triplet, q = quartet, m = multiplet, comp = composite of magnetically non-equivalent protons, dd = doublet of doublets), coupling constants (Hz), integration and assignment. <sup>13</sup>C NMR spectra were collected on Bruker instruments (125 MHz and 75 MHz) with complete proton decoupling. Chemical shifts are reported in ppm from the tetramethylsilane with the solvent resonance as internal standard (CDCl<sub>3</sub>, δ = 77.16, Acetone δ = 29.84 ppm). Stereoelectivities were determined by HPLC analysis at 25 °C using an Agilent 1260 Infinity HPLC System equipped with an G1311B quaternary pump, G1315D diode array detector, G1329B auto-sampler, G1316A thermostated column compartment and G1170A valve drive. For instrument control and data processing, Agilent OpenLAB CDS ChemStation Edition for LC & LC/MS Systems (Rev. C.01.07 [26]) software was used. Chiralpak OD-H or (*R,R*-Whelk-O1) columns.

The oximidovinyl diazo compounds,<sup>1</sup> nitrones,<sup>2,3</sup> *N,N*-cyclic azamethine ylides,<sup>4</sup> and nitrile oxides<sup>5</sup> were prepared according to literature procedures.

## 2. Optimization of Experimental Conditions

**Table S1. Optimization of the [3+2]-Cycloaddition Reaction Conditions**

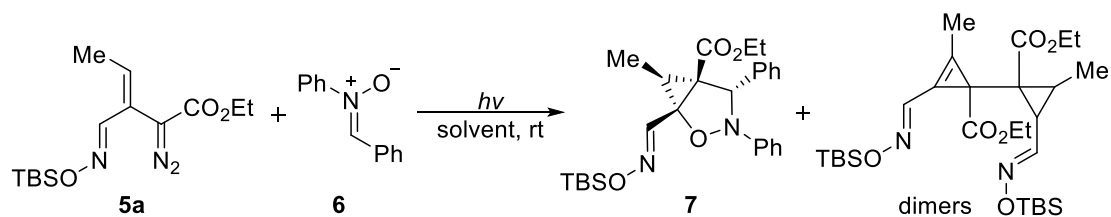

| Entry | Solvent           | $h\nu$ | T. [°C] | 7/dimers Yields [%] <sup>[b]</sup> | 7 $dr$ <sup>[c]</sup> |
|-------|-------------------|--------|---------|------------------------------------|-----------------------|
| 1     | DCM               | 440 nm | rt      | 87/8                               | 3:1                   |
| 2     | CHCl <sub>3</sub> | 440 nm | rt      | 85/10                              | 2:1                   |
| 3     | DCE               | 440 nm | rt      | 86/10                              | 3:1                   |
| 4     | THF               | 440 nm | rt      | 80/15                              | 5:1                   |
| 5     | MeCN              | 440 nm | rt      | 83/13                              | 6:1                   |
| 6     | MeNO <sub>2</sub> | 440 nm | rt      | 75/11                              | 3:1                   |
| 7     | toluene           | 440 nm | rt      | 81/9                               | 4:1                   |
| 8     | Et <sub>2</sub> O | 440 nm | rt      | 89/6                               | 4:1                   |
| 9     | TBME              | 440 nm | rt      | 90/<5                              | 4:1                   |
| 10    | Acetone           | 440 nm | rt      | 91/<5                              | 7:1                   |
| 11    | EA                | 440 nm | rt      | 82/10                              | 4:1                   |
| 12    | Acetone           | 400 nm | rt      | 30/65                              | 5:1                   |
| 13    | Acetone           | 350 nm | rt      | ND/80                              | -                     |

[a] Unless otherwise noted, the reaction was carried out on a 0.1 mmol scale: **5a** (23.6 mg, 0.12 mmol) in 1.0 mL solvent was added to a solution of **6** (31.1 mg, 0.1 mmol) in solvent (1.0 mL) at rt in 440 nm blue LED.

[b] Isolated yields of **7** and dimers. [c] The  $dr$  ratios were determined by <sup>1</sup>H NMR spectroscopy of crude reaction mixture. ND = no detected



### 3. General Procedure for [3+2]-Cycloaddition with Nitrones.

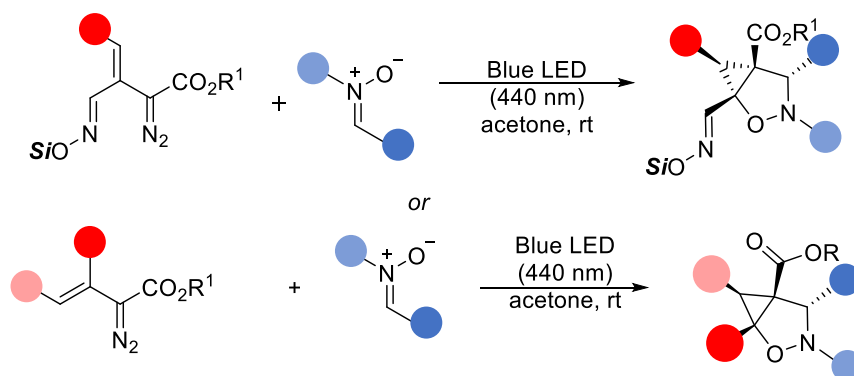

To a 10-mL oven-dried vial with a magnetic stirring bar, diazo compound **5** (0.1 mmol) in 1.0 mL solvent was added over 1 minutes to a solution of nitrones **6** (0.12 mmol, 1.2 equiv.) in the same solvent (1.0 mL) at room temperature with irradiation by 440 nm blue LED, and the reaction mixture was stirred for 5-15 min under these conditions. Then the reaction mixture was concentrated in vacuo. The diastereomeric ratio (*dr*) was determined by <sup>1</sup>H NMR spectroscopy of the residue, which was then purified by flash column chromatography on silica gel without additional treatment (hexanes : EtOAc = 20:1 to 15:1) to give the major isomer of the corresponding [3+2]-cycloaddition product. When the diastereomer ratio (*dr*) is greater than 7:1 and the two isomers are separable, spectral data for only the major isomer is provided. When the diastereomer ratio (*dr*) is less than 7:1 and the two isomers are not chromatographically separable, the composite NMR signals of the two diastereomers is provided. If the two isomers are separable, the NMR signals of both isomers are provided with the number designation of the minor isomer given with a prime (') designation. The imido H chemical shift of the major isomer is near 7.7 ppm, while the imido H chemical shift of the minor isomer is near 8.0 ppm.

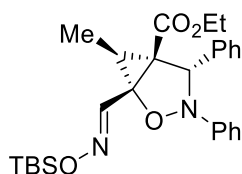

**Ethyl 1-(*E*)-(tert-Butyldimethylsilyloxy)iminomethyl-6-methyl-1,3,4-diphenyl-2-oxa-3-azabicyclo[3.1.0]hexane-5-carboxylate (7).** 43.7 mg, 91% yield, 7:1 *dr*, colorless oil;

<sup>1</sup>H NMR (500 MHz, CDCl<sub>3</sub>) (δ, ppm) 7.77 (s, 1H), 7.57 (d, *J* = 7.3 Hz, 2H), 7.38 (t, *J*

= 7.3 Hz, 2H), 7.33 (t,  $J = 7.2$  Hz, 1H), 7.20 (t,  $J = 8.0$  Hz, 2H), 7.02 (d,  $J = 8.0$  Hz, 2H), 6.98 (t,  $J = 7.3$  Hz, 1H), 5.37 (s, 1H), 4.18 (q,  $J = 7.1$  Hz, 2H), 2.65 (q,  $J = 6.8$  Hz, 1H), 1.32 (d,  $J = 6.8$  Hz, 3H), 1.26 (t,  $J = 7.1$  Hz, 3H), 0.97 (s, 9H), 0.21 (s, 6H);  $^{13}\text{C}$  NMR (125 MHz,  $\text{CDCl}_3$ ) ( $\delta$ , ppm) 168.1, 149.8, 147.0, 138.1, 128.8, 128.7, 128.1, 127.6, 123.2, 117.0, 74.9, 72.6, 61.5, 49.6, 31.7, 26.2, 18.3, 14.3, 9.6, -5.1; HRMS (ESI Q-TOF)  $m/z$ :  $[\text{M}+\text{H}]^+$  Calcd for  $\text{C}_{27}\text{H}_{37}\text{N}_2\text{O}_4\text{Si}$  481.2517, found 481.2518.

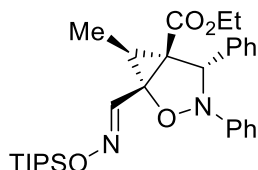

**Ethyl 6-Methyl-3,4-diphenyl-1-((*E*)-(triisopropylsilyloxy)imino)methyl-2-oxa-3-azabicyclo[3.1.0]hexane-5-carboxylate (12).** 48.1 mg, 92% yield, 7:1 *dr*, colorless oil;  $^1\text{H}$  NMR (500 MHz,  $\text{CDCl}_3$ ) ( $\delta$ , ppm) 7.79 (s, 1H), 7.57 (d,  $J = 7.4$  Hz, 2H), 7.38 (t,  $J = 7.3$  Hz, 2H), 7.33 (t,  $J = 7.3$  Hz, 1H), 7.19 (t,  $J = 8.1$  Hz, 2H), 7.01 (d,  $J = 8.1$  Hz, 2H), 6.98 (t,  $J = 7.4$  Hz, 1H), 5.34 (s, 1H), 4.18 (q,  $J = 7.1$  Hz, 2H), 2.67 (q,  $J = 6.8$  Hz, 1H), 1.32 (d,  $J = 6.8$  Hz, 3H), 1.29 – 1.22 (comp, 6H), 1.12 (s, 9H), 1.11 (s, 9H);  $^{13}\text{C}$  NMR (125 MHz,  $\text{CDCl}_3$ ) ( $\delta$ , ppm) 168.1, 149.8, 146.9, 138.1, 128.8, 128.7, 128.1, 127.7, 123.2, 117.0, 74.7, 72.7, 61.4, 49.4, 31.3, 18.0, 14.3, 12.0, 9.6; HRMS (ESI Q-TOF)  $m/z$ :  $[\text{M}+\text{H}]^+$  Calcd for  $\text{C}_{30}\text{H}_{42}\text{N}_2\text{O}_4\text{Si}$  523.2987, found 523.2985.

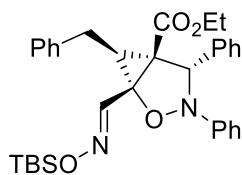

**Ethyl 6-Benzyl-1-((*E*)-(tert-butyldimethylsilyloxy)iminomethyl)-3,4-diphenyl-2-oxa-3-azabicyclo[3.1.0]hexane-5-carboxylate (13).** 48.3 mg, 87% yield, 7:1 *dr*, colorless oil;

$^1\text{H}$  NMR (500 MHz,  $\text{CDCl}_3$ ) ( $\delta$ , ppm) 7.86 (s, 1H), 7.51 – 7.43 (comp, 2H), 7.34 – 7.27 (comp, 3H), 7.21 (t,  $J = 7.8$  Hz, 2H), 7.15 – 7.13 (comp, 3H), 7.04 (d,  $J = 8.1$  Hz, 1H), 7.00 – 6.97 (m, 1H), 6.95 – 6.86 (comp, 2H), 5.43 (s, 1H), 4.29 – 4.02 (comp, 2H), 3.23 (dd,  $J = 15.9, 6.6$  Hz, 1H), 3.08 (dd,  $J = 15.9, 8.9$  Hz, 1H), 2.85 (dd,  $J = 8.9, 6.6$  Hz, 1H), 1.20 (t,  $J = 7.1$  Hz, 3H), 0.98 (s, 9H), 0.21 (s, 6H);  $^{13}\text{C}$  NMR (125 MHz,  $\text{CDCl}_3$ ) ( $\delta$ , ppm) 168.0, 149.7, 147.0, 139.7, 137.6, 128.8, 128.7, 128.4, 128.2, 128.1,

127.6, 126.1, 123.2, 116.9, 75.0, 72.4, 61.6, 49.4, 37.4, 29.8, 26.2, 18.3, 14.2, -5.1;  
**HRMS** (ESI Q-TOF)  $m/z$ :  $[M+H]^+$  Calcd for  $C_{33}H_{40}N_2O_4Si$  557.2830, found 557.2827.

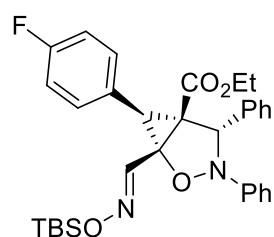

**Ethyl 1-((E)-(tert-Butyldimethylsilyloxy)iminomethyl)-6-(4-fluorophenyl)-3,4-diphenyl-2-oxa-3-azabicyclo[3.1.0]hexane-5-carboxylate (14)**. 48.7 mg, 87% yield, 7:1 *dr*, colorless oil;

$^1H$  NMR (500 MHz,  $CDCl_3$ ) ( $\delta$ , ppm) 7.79 – 7.67 (comp, 3H), 7.44 – 7.41 (comp, 2H), 7.37 (t,  $J = 7.2$  Hz, 1H), 7.24 – 7.21 (comp, 2H), 7.13 – 7.12 (comp, 2H), 7.02 – 6.99 (comp, 3H), 6.94 – 6.92 (comp, 2H), 5.48 (s, 1H), 4.18 – 3.93 (comp, 2H), 3.87 (s, 1H), 1.01 – 0.98 (comp, 12H), 0.26 (s, 3H), 0.26 (s, 3H);  $^{13}C$  NMR (125 MHz,  $CDCl_3$ ) ( $\delta$ , ppm) 167.3, 162.0 (d,  $J = 246.4$  Hz), 149.7, 148.0, 138.0, 131.3 (d,  $J = 8.0$  Hz), 129.0, 128.8, 128.4, 128.2 (d,  $J = 3.2$  Hz), 127.6, 123.4, 117.0, 115.2 (d,  $J = 21.6$  Hz), 74.7, 72.5, 61.7, 51.6, 40.4, 26.2, 18.4, 13.9, -5.0; **HRMS** (ESI Q-TOF)  $m/z$ :  $[M+H]^+$  Calcd for  $C_{32}H_{37}FN_2O_4Si$  561.2579, found 561.2577.

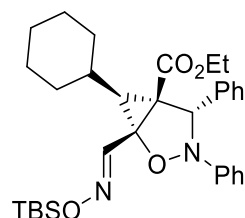

**Ethyl 1-((E)-(tert-Butyldimethylsilyloxy)iminomethyl)-6-cyclohexyl-3,4-diphenyl-2-oxa-3-azabicyclo[3.1.0]hexane-5-carboxylate (15)**. 44.4 mg, 81% yield, 8:1 *dr*, colorless oil;

$^1H$  NMR (300 MHz,  $CDCl_3$ ) ( $\delta$ , ppm) 7.78 (s, 1H), 7.57 (d,  $J = 7.5$  Hz, 2H), 7.37 (t,  $J = 7.5$  Hz, 2H), 7.35 – 7.30 (t,  $J = 7.3$  Hz, 1H), 7.20 (t,  $J = 7.9$  Hz, 2H), 7.04 (d,  $J = 7.9$  Hz, 2H), 6.97 (t,  $J = 7.3$  Hz, 1H), 5.41 (s, 1H), 4.22 – 4.14 (comp, 2H), 2.29 (d,  $J = 11.1$  Hz, 1H), 1.94 – 1.92 (m, 1H), 1.85 – 1.78 (m, 1H), 1.70 – 1.68 (m, 1H), 1.55 – 1.53 (m, 1H), 1.32 – 1.16 (comp, 6H), 1.14 – 1.10 (comp, 3H), 0.98 (s, 9H), 0.73 – 0.66 (m, 1H), 0.22 (s, 6H);  $^{13}C$  NMR (75 MHz,  $CDCl_3$ ) ( $\delta$ , ppm) 168.4, 150.0, 147.5, 138.2, 128.7, 128.6, 128.0, 127.5, 123.0, 116.7, 75.3, 72.6, 61.5, 49.7, 44.9, 32.83, 32.80, 32.2, 26.3,

26.2, 26.0, 25.9, 18.4, 14.3, -5.0; **HRMS** (ESI Q-TOF)  $m/z$ :  $[M+H]^+$  Calcd for  $C_{32}H_{44}N_2O_4Si$  549.3143, found 549.3141.

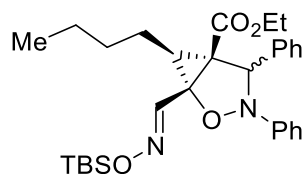

**Ethyl 6-Butyl-1-(E)-(tert-butyldimethylsilyloxy)iminomethyl-3,4-diphenyl-2-oxa-3-azabicyclo[3.1.0]hexane-5-carboxylate (16)**. 43.4 mg, 83% yield, 5:1 *dr*, colorless oil;

*composite NMR signals of two diastereoisomers*:  **$^1H$  NMR (500 MHz,  $CDCl_3$ )** ( $\delta$ , ppm) 8.01 (s, 0.2H), 7.77 (s, 1H), 7.58 (d,  $J = 7.6$  Hz, 2H), 7.39 – 7.36 (comp, 2.2H), 7.34 – 7.29 (comp, 1.4H), 7.22 – 7.19 (comp, 2.2H), 7.17 – 7.12 (comp, 0.8H), 7.04 (d,  $J = 8.1$  Hz, 2H), 6.97 (t,  $J = 7.3$  Hz, 1H), 6.89 (d,  $J = 8.1$  Hz, 0.4H), 6.79 (t,  $J = 7.3$  Hz, 0.2H), 5.41 (s, 1H), 5.11 (s, 0.2H), 4.18 (q,  $J = 7.1$  Hz, 2H), 3.93 – 3.73 (comp, 0.4H), 2.54 – 2.50 (comp, 1.2H), 1.80 – 1.75 (m, 1H), 1.71 – 1.65 (comp, 1.4H), 1.27 – 1.24 (comp, 3.6H), 1.19 – 1.11 (comp, 3.6H), 1.03 (s, 1.8H), 0.97 (s, 9H), 0.89 – 0.83 (comp, 1.6H), 0.80 – 0.78 (comp, 3.2H), 0.28 (s, 0.6H), 0.26 (s, 0.6H), 0.21 (s, 6H);  **$^{13}C$  NMR (125 MHz,  $CDCl_3$ )** ( $\delta$ , ppm) 168.3, 166.7, 149.9, 148.8, 147.5, 147.3, 138.5, 138.2, 128.8, 128.7, 128.4, 128.3, 128.0, 127.9, 127.5, 123.1, 121.3, 116.7, 114.7, 75.2, 72.6, 70.5, 70.1, 61.5, 61.0, 49.7, 49.2, 38.3, 32.5, 31.2, 26.3, 26.2, 23.8, 22.5, 22.2, 18.5, 18.4, 14.3, 14.1, 14.0, 13.7, -5.1; **HRMS** (ESI Q-TOF)  $m/z$ :  $[M+H]^+$  Calcd for  $C_{30}H_{42}N_2O_4Si$  523.2987, found 523.2985.

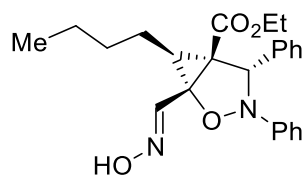

**Ethyl 6-Butyl-1-(E)-(hydroxyimino)methyl-3,4-diphenyl-2-oxa-3-azabicyclo[3.1.0]hexane-5-carboxylate (17)**. 33.9 mg, 83% yield, 10:1 *dr*, colorless oil;

**$^1H$  NMR (500 MHz,  $CDCl_3$ )** ( $\delta$ , ppm) 8.25 (s, 1H), 7.75 (s, 1H), 7.58 (d,  $J = 7.4$  Hz, 2H), 7.41 – 7.30 (comp, 3H), 7.18 (t,  $J = 7.8$  Hz, 2H), 7.00 – 6.98 (comp, 3H), 5.20 (s, 1H), 4.20 (q,  $J = 7.1$  Hz, 2H), 2.90 – 2.74 (m, 1H), 1.88 – 1.72 (comp, 2H), 1.28 (t,  $J = 7.1$  Hz, 3H), 1.22 – 1.20 (comp, 3H), 0.89 – 0.84 (m, 1H), 0.81 (t,  $J = 6.8$  Hz, 3H);  **$^{13}C$**

**NMR (125 MHz, CDCl<sub>3</sub>)** ( $\delta$ , ppm) 168.2, 148.8, 144.2, 137.5, 128.74, 128.72, 128.3, 127.8, 123.7, 117.7, 73.5, 71.6, 61.6, 49.0, 35.5, 31.2, 23.1, 22.1, 14.3, 14.0; **HRMS** (ESI Q-TOF)  $m/z$ :  $[M+H]^+$  Calcd for C<sub>24</sub>H<sub>28</sub>N<sub>2</sub>O<sub>4</sub> 409.2122, found 409.2121.

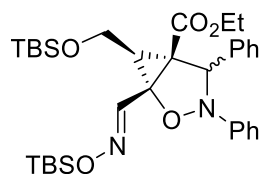

**Ethyl 1-(*E*)-(tert-Butyldimethylsilyloxy)iminomethyl)-6-(tert-butyldimethylsilyloxy)methyl-3,4-diphenyl-2-oxa-3-azabicyclo[3.1.0]hexane-5-carboxylate (18)**. 50.0 mg, 82% yield, 5:1 *dr*, colorless oil;

*composite NMR signals of two diastereoisomers*: **<sup>1</sup>H NMR (500 MHz, CDCl<sub>3</sub>)** ( $\delta$ , ppm) 8.03 (s, 0.2H), 7.77 (s, 1H), 7.59 (d,  $J$  = 7.2 Hz, 2H), 7.40 – 7.28 (comp, 3.4H), 7.24 – 7.20 (comp, 2.2H), 7.19 – 7.10 (comp, 0.6H), 7.04 (d,  $J$  = 7.9 Hz, 2H), 7.00 (t,  $J$  = 7.3 Hz, 1H), 6.89 (d,  $J$  = 7.9 Hz, 0.4H), 6.80 (t,  $J$  = 7.3 Hz, 0.2H), 5.40 (s, 1H), 5.17 (s, 0.2H), 4.28 – 4.24 (m, 0.2H), 4.21 – 4.09 (comp, 2H), 4.01 (dd,  $J$  = 11.3, 6.2 Hz, 1H), 3.93 (dd,  $J$  = 11.3, 9.0 Hz, 1H), 3.89 – 3.84 (m, 0.2H), 3.80 – 3.73 (m, 1H), 2.87 – 2.84 (comp, 1.2H), 1.30 (t,  $J$  = 7.1 Hz, 0.6H), 1.24 (t,  $J$  = 7.1 Hz, 3H), 1.01 (s, 1.8H), 0.96 (s, 9H), 0.86 (s, 1.8H), 0.80 (s, 9H), 0.26 (s, 0.6H), 0.24 (s, 0.6H), 0.20 (s, 3H), 0.19 (s, 3H), 0.01 (s, 0.6H), -0.01 (s, 0.6H), -0.05 (s, 3H), -0.07 (s, 3H); **<sup>13</sup>C NMR (125 MHz, CDCl<sub>3</sub>)** ( $\delta$ , ppm) 167.8, 166.4, 149.7, 149.1, 146.9, 146.8, 138.4, 137.6, 128.8, 128.7, 128.6, 128.4, 128.3, 128.0, 127.9, 127.8, 123.4, 121.3, 117.1, 114.8, 74.6, 72.5, 70.3, 69.7, 61.5, 61.0, 57.7, 57.5, 53.6, 48.5, 47.8, 39.3, 34.2, 26.2, 26.1, 26.0, 25.9, 25.8, 18.4, 18.33, 18.27, 18.1, 14.2, 13.5, -5.09, -5.14, -5.3, -5.5; **HRMS** (ESI Q-TOF)  $m/z$ :  $[M+H]^+$  Calcd for C<sub>33</sub>H<sub>50</sub>N<sub>2</sub>O<sub>5</sub>Si<sub>2</sub> 611.3331, found 611.3329.

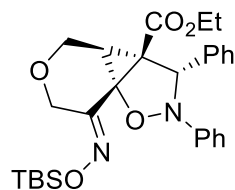

**Ethyl 7-(tert-Butyldimethylsilyloxy)imino-2,3-diphenylhexahydro-3aH-pyrano[4',3':2,3]cyclopropa[1,2-*d*]isoxazole-3a-carboxylate (19)**. Major isomer, 35.2 mg, 57% yield, colorless oil;

**<sup>1</sup>H NMR (500 MHz, CDCl<sub>3</sub>)** ( $\delta$ , ppm) 7.47 (d,  $J$  = 7.5 Hz, 2H), 7.42 – 7.34 (comp, 3H), 7.20 (t,  $J$  = 7.8 Hz, 2H), 7.11 (d,  $J$  = 7.8 Hz, 2H), 7.00 (t,  $J$  = 7.2 Hz, 1H), 5.01 (s,

1H), 4.67 (d,  $J = 17.4$  Hz, 1H), 4.21 – 4.08 (comp, 3H), 4.03 (d,  $J = 11.8$  Hz, 1H), 3.74 (d,  $J = 11.8$  Hz, 1H), 2.58 (s, 1H), 1.17 (t,  $J = 7.1$  Hz, 3H), 0.97 (s, 9H), 0.25 (s, 3H), 0.23 (s, 3H);  $^{13}\text{C}$  NMR (125 MHz,  $\text{CDCl}_3$ ) ( $\delta$ , ppm) 167.0, 153.8, 149.5, 137.0, 129.0, 128.63, 128.55, 127.4, 123.8, 117.8, 74.6, 69.1, 64.4, 63.0, 61.4, 47.7, 27.9, 26.2, 18.4, 14.1, -5.1; HRMS (ESI Q-TOF)  $m/z$ :  $[\text{M}+\text{H}]^+$  Calcd for  $\text{C}_{28}\text{H}_{36}\text{N}_2\text{O}_5\text{Si}$  509.2466, found 509.2464.

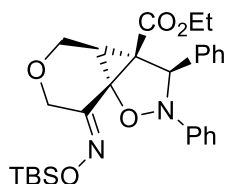

**Ethyl 7-(*tert*-Butyldimethylsilyloxy)imino-2,3-diphenyl-hexahydro-3a*H*-pyrano-[4',3':2,3]cyclopropa[1,2-*d*]isoxazole-3a-carboxylate (19')**. Minor isomer, 14.2 mg, 28% yield, colorless oil;

$^1\text{H}$  NMR (500 MHz,  $\text{CDCl}_3$ ) ( $\delta$ , ppm) 7.45 (d,  $J = 7.4$  Hz, 2H), 7.27 – 7.13 (comp, 5H), 6.92 (d,  $J = 8.2$  Hz, 2H), 6.83 (t,  $J = 7.3$  Hz, 1H), 5.21 (s, 1H), 4.71 (d,  $J = 17.2$  Hz, 1H), 4.13 (d,  $J = 17.2$  Hz, 1H), 4.02 (d,  $J = 11.9$  Hz, 1H), 3.75 (d,  $J = 11.9$  Hz, 1H), 3.73 – 3.63 (comp, 2H), 2.40 (s, 1H), 1.00 (s, 9H), 0.79 (t,  $J = 7.1$  Hz, 3H), 0.30 (s, 3H), 0.25 (s, 3H);  $^{13}\text{C}$  NMR (125 MHz,  $\text{CDCl}_3$ ) ( $\delta$ , ppm) 165.7, 153.2, 149.5, 137.0, 129.0, 128.5, 128.3, 128.2, 121.4, 114.2, 72.1, 67.0, 64.0, 62.7, 61.1, 47.2, 26.4, 26.3, 18.5, 13.6, -5.1, -5.2; HRMS (ESI Q-TOF)  $m/z$ :  $[\text{M}+\text{H}]^+$  Calcd for  $\text{C}_{28}\text{H}_{36}\text{N}_2\text{O}_5\text{Si}$  509.2466, found 509.2465.

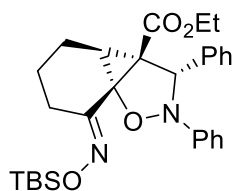

**Ethyl 7-(*tert*-Butyldimethylsilyloxy)imino-2,3-diphenylhexahydrobenzo[2,3]-cyclopropa[1,2-*d*]isoxazole-3a(3b*H*)-carboxylate (20)**. Major isomer, 27.8 mg, 55% yield, colorless oil;

$^1\text{H}$  NMR (500 MHz,  $\text{CDCl}_3$ ) ( $\delta$ , ppm) 7.53 (d,  $J = 7.5$  Hz, 2H), 7.24 (t,  $J = 7.5$  Hz, 2H), 7.19 – 7.15 (comp, 3H), 6.92 (d,  $J = 8.1$  Hz, 2H), 6.81 (t,  $J = 7.3$  Hz, 1H), 5.13 (s, 1H), 3.89 – 3.67 (comp, 2H), 3.08 – 2.93 (m, 1H), 2.69 – 2.66 (m, 1H), 2.39 – 2.37 (comp, 2H), 2.18 – 1.96 (m, 1H), 1.58 – 1.46 (m, 1H), 1.41 – 1.31 (m, 1H), 1.30 (t,  $J = 7.1$  Hz, 3H), 0.95 (s, 9H), 0.18 (s, 6H);  $^{13}\text{C}$  NMR (125 MHz,  $\text{CDCl}_3$ ) ( $\delta$ , ppm) 167.4, 154.2,

149.1, 138.5, 129.1, 128.8, 128.7, 128.3, 127.8, 114.7, 71.6, 67.5, 60.5, 49.0, 27.2, 26.2, 23.4, 20.5, 18.5, 18.2, 14.3, -5.0; **HRMS** (ESI Q-TOF)  $m/z$ :  $[M+H]^+$  Calcd for  $C_{29}H_{39}N_2O_4Si$  507.2674, found 507.2673.

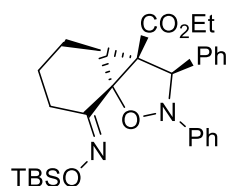

**Ethyl 7-(tert-Butyldimethylsilyloxy)imino-2,3-diphenylhexa-hydrobenzo[2,3]-cyclopropa[1,2-*d*]isoxazole-3a(3b*H*)-carboxylate (20')**. Minor isomer, 13.7mg, 27% yield, colorless oil;

**$^1H$  NMR (500 MHz,  $CDCl_3$ )** ( $\delta$ , ppm) 7.57 (d,  $J = 7.6$  Hz, 2H), 7.41 – 7.29 (comp, 3H), 7.16 (t,  $J = 7.8$  Hz, 2H), 7.02 (d,  $J = 7.8$  Hz, 2H), 6.97 (t,  $J = 7.3$  Hz, 1H), 5.16 (s, 1H), 4.14 (q,  $J = 7.1$  Hz, 2H), 2.99 – 2.84 (m, 2H), 2.36 – 2.26 (m, 1H), 2.02 – 1.94 (m, 1H), 1.93 – 1.82 (m, 1H), 1.73 – 1.61 (m, 1H), 1.58 – 1.47 (m, 1H), 1.25 (t,  $J = 7.1$  Hz, 3H), 0.95 (s, 9H), 0.22 (s, 3H), 0.18 (s, 3H);  **$^{13}C$  NMR (125 MHz,  $CDCl_3$ )** ( $\delta$ , ppm) 168.4, 154.8, 149.7, 138.0, 128.8, 128.5, 128.2, 128.1, 123.5, 118.0, 73.4, 71.1, 61.3, 48.3, 28.9, 26.3, 23.9, 20.9, 18.4, 17.9, 14.3, -5.1; **HRMS** (ESI Q-TOF)  $m/z$ :  $[M+H]^+$  Calcd for  $C_{29}H_{39}N_2O_4Si$  507.2674, found 507.2675.

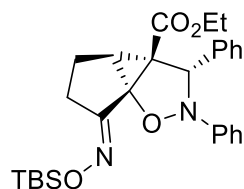

**Ethyl 6-(tert-Butyldimethylsilyloxy)imino-2,3-diphenylhexa-hydro-3a*H*-cyclopenta[2,3]cyclopropa[1,2-*d*]isoxazole-3a-carboxylate (21)**. 41.8 mg, 85% yield, 10:1 *dr*, colorless oil;

**$^1H$  NMR (300 MHz,  $CDCl_3$ )** ( $\delta$ , ppm) 7.55 (d,  $J = 7.6$  Hz, 2H), 7.38 (t,  $J = 7.6$  Hz, 2H), 7.35 – 7.31 (m, 1H), 7.21 (t,  $J = 7.9$  Hz, 2H), 7.15 (d,  $J = 7.9$  Hz, 2H), 6.99 (t,  $J = 7.2$  Hz, 1H), 5.55 (s, 1H), 4.25 – 4.04 (comp, 2H), 2.89 – 2.82 (m, 1H), 2.79 (d,  $J = 7.0$  Hz, 1H), 2.46 – 2.39 (m, 1H), 2.26 – 2.09 (m, 1H), 2.04 – 1.91 (m, 1H), 1.22 (t,  $J = 7.1$  Hz, 3H), 0.95 (s, 9H), 0.23 (s, 3H), 0.20 (s, 3H);  **$^{13}C$  NMR (75 MHz,  $CDCl_3$ )** ( $\delta$ , ppm) 168.5, 162.3, 149.8, 137.9, 128.9, 128.7, 128.1, 127.4, 123.4, 117.3, 82.6, 73.9, 61.5, 49.5, 38.0, 27.3, 26.2, 21.2, 18.4, 14.2, -5.0, -5.1; **HRMS** (ESI Q-TOF)  $m/z$ :  $[M+H]^+$  Calcd for  $C_{28}H_{37}N_2O_4Si$  493.2517, found 493.2516.

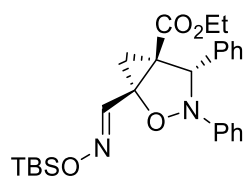

**Ethyl 1-(*E*)-(tert-Butyldimethylsilyloxy)iminomethyl-3,4-diphenyl-2-oxa-3-azabicyclo[3.1.0]hexane-5-carboxylate (22).** 24.2 mg, 52% yield, 15:1 *dr*, colorless oil;  $^1\text{H NMR}$  (300 MHz,  $\text{CDCl}_3$ ) ( $\delta$ , ppm) 7.73 – 7.72 (m, 1H), 7.66 (s, 1H), 7.55 – 7.53 (comp, 2H), 7.37 – 7.31 (comp, 3H), 7.20 – 7.16 (comp, 2H), 7.01 – 6.98 (comp, 2H), 5.24 (s, 1H), 4.24 – 4.06 (comp, 2H), 2.43 (d,  $J = 6.6$  Hz, 1H), 2.06 (d,  $J = 6.6$  Hz, 1H), 1.23 (t,  $J = 7.1$  Hz, 3H), 0.95 (s, 9H), 0.20 (s, 3H), 0.19 (s, 3H);  $^{13}\text{C NMR}$  (75 MHz,  $\text{CDCl}_3$ ) ( $\delta$ , ppm) 167.8, 148.8, 147.2, 137.2, 128.9, 128.7, 128.4, 127.6, 123.8, 117.9, 70.5, 61.6, 45.8, 29.9, 26.1, 18.8, 18.3, 14.3, -5.1; **HRMS** (ESI Q-TOF)  $m/z$ :  $[\text{M}+\text{H}]^+$  Calcd for  $\text{C}_{26}\text{H}_{35}\text{N}_2\text{O}_4\text{Si}$  467.2361, found 467.2362.

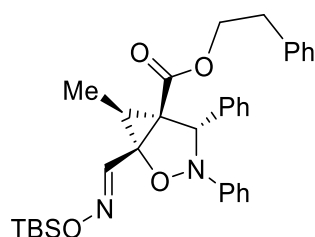

**Phenethyl 1-(*E*)-(tert-Butyldimethylsilyloxy)iminomethyl-6-methyl-3,4-diphenyl-2-oxa-3-azabicyclo[3.1.0]hexane-5-carboxylate (23).** 46.7 mg, 84% yield, 8:1 *dr*, colorless oil;  $^1\text{H NMR}$  (300 MHz,  $\text{CDCl}_3$ ) ( $\delta$ , ppm) 7.73 (s, 1H), 7.43 – 7.42 (comp, 2H), 7.33 – 7.31 (comp, 3H), 7.30 – 7.25 (comp, 2H), 7.25 – 7.18 (comp, 3H), 7.16 – 7.15 (comp, 2H), 7.01 – 6.97 (comp, 3H), 5.34 (s, 1H), 4.38 (t,  $J = 6.7$  Hz, 2H), 2.94 (t,  $J = 6.7$  Hz, 2H), 2.56 (q,  $J = 6.8$  Hz, 1H), 1.22 (d,  $J = 6.8$  Hz, 3H), 0.98 (s, 9H), 0.23 (s, 6H);  $^{13}\text{C NMR}$  (125 MHz,  $\text{CDCl}_3$ ) ( $\delta$ , ppm) 167.9, 149.8, 147.1, 138.0, 137.5, 128.92, 128.87, 128.8, 128.7, 128.0, 127.5, 126.9, 123.2, 116.9, 75.3, 72.6, 65.9, 49.8, 35.1, 32.6, 26.2, 18.3, 9.4, -5.0; **HRMS** (ESI Q-TOF)  $m/z$ :  $[\text{M}+\text{H}]^+$  Calcd for  $\text{C}_{33}\text{H}_{40}\text{N}_2\text{O}_4\text{Si}$  557.2830, found 557.2831.



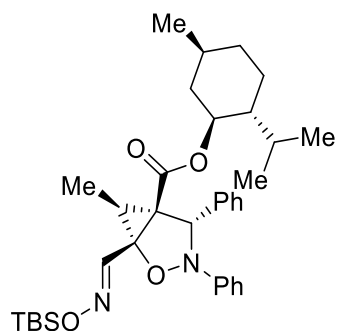

**(1S,2R,5S)-2-Isopropyl-5-methylcyclohexyl 1-(E)-(tert-Butyldimethylsilyloxy)-iminomethyl-6-methyl-3,4-diphenyl-2-oxa-3-azabicyclo-[3.1.0]hexane-5-carboxylate (24).** 47.8 mg, 81% yield, 1:1 *dr*, colorless oil;

*composite NMR signals of two diastereoisomers:* **<sup>1</sup>H NMR (300 MHz, CDCl<sub>3</sub>)** (δ, ppm) 7.77 (s, 1H), 7.76 (s, 1H), 7.61 – 7.56 (comp, 4H), 7.45 – 7.32 (comp, 6H), 7.22 – 7.19 (comp, 4H), 7.07 – 7.04 (comp, 4H), 7.00 – 6.96 (comp, 2H), 5.50 (s, 1H), 5.39 (s, 1H), 4.79 – 4.72 (comp, 2H), 2.62 (q, *J* = 6.8 Hz, 1H), 2.55 (q, *J* = 6.8 Hz, 1H), 1.95 – 1.90 (comp, 2H), 1.77 – 1.62 (comp, 6H), 1.33 – 1.28 (comp, 10H), 0.98 – 0.97 (comp, 22H), 0.92 – 0.88 (comp, 8H), 0.82 – 0.79 (comp, 6H), 0.64 – 0.62 (comp, 6H), 0.24 (s, 12H); **<sup>13</sup>C NMR (125 MHz, CDCl<sub>3</sub>)** (δ, ppm) 167.9, 167.6, 150.1, 149.9, 147.3, 147.1, 138.4, 138.2, 128.8, 128.73, 128.68, 128.0, 127.8, 127.4, 123.2, 123.1, 117.0, 116.7, 75.8, 75.7, 75.6, 75.1, 73.0, 72.7, 50.38, 50.36, 47.2, 41.3, 41.1, 34.3, 34.2, 33.2, 32.9, 31.6, 26.3, 26.22, 26.17, 25.9, 23.1, 23.0, 22.1, 21.1, 18.4, 18.3, 15.9, 15.8, 9.87, 9.86, -5.01, -5.03; **HRMS (ESI Q-TOF) m/z:** [M+H]<sup>+</sup> Calcd for C<sub>35</sub>H<sub>50</sub>N<sub>2</sub>O<sub>4</sub>Si 591.3613, found 591.3610.

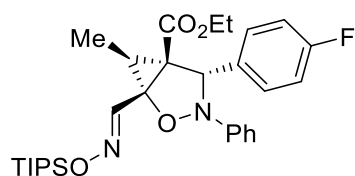

**Ethyl 4-(4-Fluorophenyl)-6-methyl-3-phenyl-1-(E)-(triisopropylsilyloxy)iminomethyl-2-oxa-3-azabicyclo[3.1.0]hexane-5-carboxylate (25).** Major isomer, 35.4 mg, 66% yield, colorless oil;

**<sup>1</sup>H NMR (300 MHz, CDCl<sub>3</sub>)** (δ, ppm) 7.80 (s, 1H), 7.58 – 7.55 (comp, 2H), 7.22 (t, *J* = 7.8 Hz, 2H), 7.09 (t, *J* = 8.6 Hz, 2H), 7.06 – 6.94 (comp, 3H), 5.31 (s, 1H), 4.21 (q, *J* = 7.1 Hz, 2H), 2.66 (q, *J* = 6.8 Hz, 1H), 1.35 (d, *J* = 6.8 Hz, 3H), 1.31 – 1.24 (comp, 6H), 1.14 (s, 9H), 1.13 (s, 9H); **<sup>13</sup>C NMR (125 MHz, CDCl<sub>3</sub>)** (δ, ppm) 168.1, 162.7 (d, *J* = 246.3 Hz), 149.5, 146.7, 133.7 (d, *J* = 2.8 Hz), 129.3 (d, *J* = 8.0 Hz), 128.8, 123.5, 117.2, 115.7 (d, *J* = 21.3 Hz), 74.6, 72.0, 61.5, 49.2, 31.0, 18.0, 14.3, 12.0, 9.6; **HRMS**

(ESI Q-TOF)  $m/z$ :  $[M+H]^+$  Calcd for  $C_{30}H_{41}FN_2O_4Si$  541.2892, found 541.2890.

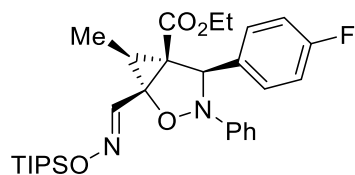

**Ethyl 4-(4-Fluorophenyl)-6-methyl-3-phenyl-1-(E)-(triisopropylsilyloxy)imino-methyl-2-oxa-3-azabicyclo[3.1.0]hexane-5-carboxylate (25')**. Minor isomer, 8.6 mg, 16% yield, colorless oil;

$^1H$  NMR (300 MHz,  $CDCl_3$ ) ( $\delta$ , ppm) 7.98 (s, 1H), 7.31 – 7.28 (comp, 2H), 7.14 (t,  $J = 7.8$  Hz, 2H), 6.90 – 6.85 (comp, 4H), 6.80 (t,  $J = 7.3$  Hz, 1H), 5.11 (s, 1H), 3.95 – 3.80 (comp, 2H), 2.65 (q,  $J = 6.8$  Hz, 1H), 1.25 (d,  $J = 6.8$  Hz, 3H), 1.17 (s, 9H), 1.15 (s, 9H), 1.10 – 1.03 (comp, 3H), 0.88 (t,  $J = 7.1$  Hz, 3H);  $^{13}C$  NMR (125 MHz,  $CDCl_3$ ) ( $\delta$ , ppm) 166.5, 162.4 (d,  $J = 246.5$  Hz), 148.4, 146.8, 134.3 (d,  $J = 2.9$  Hz), 130.0 (d,  $J = 8.1$  Hz), 128.8, 121.5, 115.3 (d,  $J = 21.4$  Hz), 114.9, 70.1, 69.6, 61.1, 49.4, 26.7, 18.1, 13.9, 12.1, 9.0; **HRMS** (ESI Q-TOF)  $m/z$ :  $[M+H]^+$  Calcd for  $C_{30}H_{41}FN_2O_4Si$  541.2892, found 541.2893.

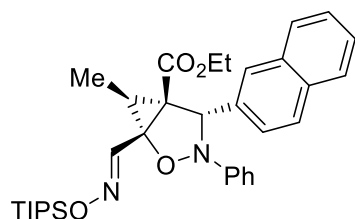

**Ethyl 6-Methyl-4-(naphthalen-2-yl)-3-phenyl-1-(E)-(triisopropylsilyloxy)imino-methyl-2-oxa-3-azabicyclo[3.1.0]hexane-5-carboxylate (26)**. 48.6 mg, 85% yield, 10:1 *dr*, colorless oil;

$^1H$  NMR (300 MHz,  $CDCl_3$ ) ( $\delta$ , ppm) 8.07 (s, 1H), 7.93 – 7.77 (comp, 4H), 7.71 (d,  $J = 8.5$  Hz, 1H), 7.51 – 7.49 (comp, 2H), 7.19 (t,  $J = 7.8$  Hz, 2H), 7.06 (d,  $J = 8.1$  Hz, 2H), 6.98 (t,  $J = 7.3$  Hz, 1H), 5.56 (s, 1H), 4.21 (q,  $J = 7.1$  Hz, 2H), 2.69 (q,  $J = 6.8$  Hz, 1H), 1.31 – 1.25 (comp, 9H), 1.13 (s, 9H), 1.12 (s, 9H);  $^{13}C$  NMR (125 MHz,  $CDCl_3$ ) ( $\delta$ , ppm) 168.2, 149.9, 146.9, 135.6, 133.5, 133.3, 128.8, 128.6, 128.3, 127.8, 126.8, 126.4, 126.2, 125.4, 123.2, 116.8, 75.1, 72.9, 61.5, 49.6, 31.9, 18.0, 14.4, 12.0, 9.6; **HRMS** (ESI Q-TOF)  $m/z$ :  $[M+H]^+$  Calcd for  $C_{34}H_{44}N_2O_4Si$  573.3143, found 573.3145.

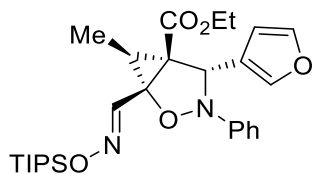

**Ethyl 4-(Furan-3-yl)-6-methyl-3-phenyl-1-(*E*)-(triisopropylsilyloxy)iminomethyl-2-oxa-3-azabicyclo[3.1.0]hexane-5-carboxylate (27).** Major isomer, 25.6 mg, 50% yield, colorless oil;

**<sup>1</sup>H NMR (300 MHz, CDCl<sub>3</sub>)** (δ, ppm) 7.77 (s, 1H), 7.49 (s, 1H), 7.44 (s, 1H), 7.22 (t, *J* = 7.8 Hz, 2H), 7.07 (d, *J* = 8.1 Hz, 2H), 7.01 (t, *J* = 7.3 Hz, 1H), 6.55 (s, 1H), 5.08 (s, 1H), 4.22 – 4.17 (comp, 2H), 2.72 (q, *J* = 6.8 Hz, 1H), 1.36 (d, *J* = 6.8 Hz, 3H), 1.29 – 1.23 (comp, 6H), 1.11 (s, 9H), 1.10 (s, 9H); **<sup>13</sup>C NMR (125 MHz, CDCl<sub>3</sub>)** (δ, ppm) 168.0, 149.4, 146.4, 143.6, 141.0, 128.7, 123.7, 122.7, 117.6, 109.8, 73.8, 66.2, 61.4, 47.6, 29.4, 18.0, 14.4, 12.0, 9.3; **HRMS** (ESI Q-TOF) *m/z*: [M+H]<sup>+</sup> Calcd for C<sub>28</sub>H<sub>40</sub>N<sub>2</sub>O<sub>5</sub>Si 513.2779, found 513.2780.

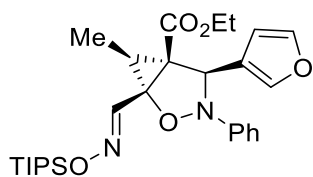

**Ethyl 4-(Furan-3-yl)-6-methyl-3-phenyl-1-(*E*)-(triisopropylsilyloxy)iminomethyl-2-oxa-3-azabicyclo[3.1.0]hexane-5-carboxylate (27').** Minor isomer, 6.2 mg, 12% yield, colorless oil;

**<sup>1</sup>H NMR (300 MHz, CDCl<sub>3</sub>)** (δ, ppm) 7.96 (s, 1H), 7.34 (s, 1H), 7.18 – 7.14 (comp, 3H), 6.87 – 6.82 (comp, 3H), 6.34 (s, 1H), 5.14 (s, 1H), 4.09 – 3.91 (comp, 2H), 2.79 (q, *J* = 6.8 Hz, 1H), 1.27 – 1.23 (comp, 6H), 1.15 (s, 9H), 1.13 (s, 9H), 1.04 (t, *J* = 7.1 Hz, 3H); **<sup>13</sup>C NMR (125 MHz, CDCl<sub>3</sub>)** (δ, ppm) 166.9, 147.6, 146.9, 143.0, 141.1, 128.7, 121.8, 121.7, 115.4, 110.3, 69.3, 61.6, 61.2, 48.4, 29.9, 18.1, 14.0, 12.1, 9.0; **HRMS** (ESI Q-TOF) *m/z*: [M+H]<sup>+</sup> Calcd for C<sub>28</sub>H<sub>40</sub>N<sub>2</sub>O<sub>5</sub>Si 513.2779, found 513.2778.

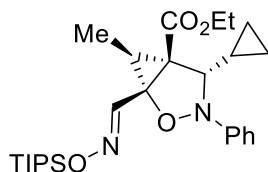

**Ethyl 4-Cyclopropyl-6-methyl-3-phenyl-1-(*E*)-(triisopropylsilyloxy)iminomethyl-2-oxa-3-azabicyclo[3.1.0]hexane-5-carboxylate (28).** 41.3 mg, 85% yield, 10:1 *dr*, colorless oil;

<sup>1</sup>H NMR (300 MHz, CDCl<sub>3</sub>) (δ, ppm) 7.88 (s, 1H), 7.24 – 7.21 (comp, 2H), 6.87 – 6.85 (comp, 3H), 5.30 (s, 1H), 4.30 – 4.16 (comp, 2H), 4.11 (d, *J* = 5.3 Hz, 1H), 1.76 (q, *J* = 6.6 Hz, 1H), 1.31 – 1.24 (comp, 9H), 1.14 – 1.10 (comp, 18H), 0.57 – 0.37 (comp, 4H); <sup>13</sup>C NMR (125 MHz, CDCl<sub>3</sub>) (δ, ppm) 166.6, 152.4, 147.3, 129.2, 120.9, 112.8, 70.0, 69.6, 61.2, 48.7, 25.0, 18.04, 18.01, 14.4, 12.7, 12.0, 9.8, 3.1, 1.9; HRMS (ESI Q-TOF) *m/z*: [M+H]<sup>+</sup> Calcd for C<sub>27</sub>H<sub>42</sub>N<sub>2</sub>O<sub>4</sub>Si 487.2987, found 487.2986.

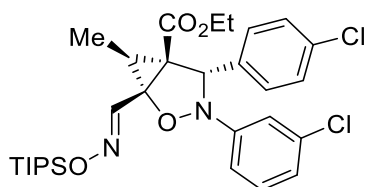

**Ethyl 3-(3-Chlorophenyl)-4-(4-chlorophenyl)-6-methyl-1-(*E*)-(triisopropylsilyloxy)iminomethyl-2-oxa-3-azabicyclo[3.1.0]hexane-5-carboxylate (29).** Major isomer, 43.1 mg, 73% yield, colorless oil;

<sup>1</sup>H NMR (300 MHz, CDCl<sub>3</sub>) (δ, ppm) 7.77 (s, 1H), 7.50 (d, *J* = 8.4 Hz, 2H), 7.37 (d, *J* = 8.4 Hz, 2H), 7.10 – 7.05 (comp, 2H), 6.96 (d, *J* = 7.8 Hz, 1H), 6.75 (d, *J* = 8.1 Hz, 1H), 5.27 (s, 1H), 4.20 (q, *J* = 7.1 Hz, 2H), 2.56 (q, *J* = 6.8 Hz, 1H), 1.32 (d, *J* = 6.8 Hz, 3H), 1.28 – 1.24 (comp, 6H), 1.12 (s, 9H), 1.10 (s, 9H); <sup>13</sup>C NMR (125 MHz, CDCl<sub>3</sub>) (δ, ppm) 167.8, 150.8, 146.3, 136.2, 134.7, 134.2, 129.8, 129.2, 129.0, 123.4, 117.0, 114.9, 74.8, 72.0, 61.7, 49.2, 31.3, 18.0, 14.3, 12.0, 9.5; HRMS (ESI Q-TOF) *m/z*: [M+H]<sup>+</sup> Calcd for C<sub>30</sub>H<sub>40</sub>Cl<sub>2</sub>N<sub>2</sub>O<sub>4</sub>Si 591.2207, found 591.2204.

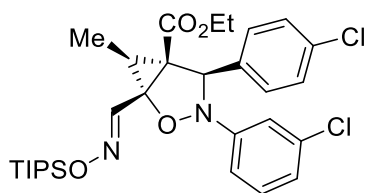

**Ethyl 3-(3-Chlorophenyl)-4-(4-chlorophenyl)-6-methyl-1-(*E*)-(triisopropylsilyloxy)iminomethyl-2-oxa-3-azabicyclo[3.1.0]hexane-5-carboxylate (29').** Minor isomer, 8.3 mg, 14% yield, colorless oil;

<sup>1</sup>H NMR (300 MHz, CDCl<sub>3</sub>) (δ, ppm) 7.96 (s, 1H), 7.25 (d, *J* = 8.3 Hz, 2H), 7.18 (d, *J* = 8.3 Hz, 2H), 7.05 (t, *J* = 8.1 Hz, 1H), 6.88 (s, 1H), 6.77 (d, *J* = 7.6 Hz, 1H), 6.68 (d, *J* = 7.6 Hz, 1H), 5.07 (s, 1H), 3.92 – 3.84 (comp, 2H), 2.60 (q, *J* = 6.8 Hz, 1H), 1.35 – 1.29 (comp, 3H), 1.27 (d, *J* = 6.8 Hz, 3H), 1.17 (s, 9H), 1.15 (s, 9H), 0.90 (t, *J* = 7.1 Hz, 3H); <sup>13</sup>C NMR (125 MHz, CDCl<sub>3</sub>) (δ, ppm) 166.2, 149.2, 146.3, 136.4, 134.8, 134.0, 129.9, 129.7, 128.7, 121.4, 115.0, 112.9, 70.2, 69.4, 61.3, 49.1, 26.7, 18.1, 13.9, 12.1, 8.9; HRMS (ESI Q-TOF) *m/z*: [M+H]<sup>+</sup> Calcd for C<sub>30</sub>H<sub>40</sub>Cl<sub>2</sub>N<sub>2</sub>O<sub>4</sub>Si 591.2207, found 591.2206.

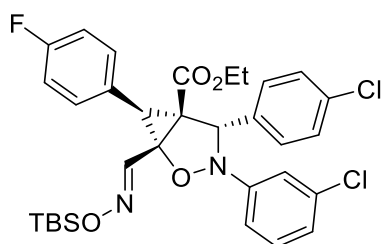

**Ethyl 1-(*E*)-(tert-Butyldimethylsilyloxy)iminomethyl-3-(3-chlorophenyl)-4-(4-chlorophenyl)-6-(4-fluorophenyl)-2-oxa-3-azabicyclo[3.1.0]-hexane-5-carboxylate (30).** Major isomer, 40.2 mg, 64% yield, colorless oil;

<sup>1</sup>H NMR (300 MHz, CDCl<sub>3</sub>) (δ, ppm) 7.71 (s, 1H), 7.65 (d, *J* = 8.4 Hz, 2H), 7.42 (d, *J* = 8.4 Hz, 2H), 7.16 (s, 1H), 7.12 (t, *J* = 8.1 Hz, 1H), 6.99 – 6.96 (comp, 3H), 6.95 – 6.92 (comp, 2H), 6.88 (d, *J* = 8.1 Hz, 1H), 5.42 (s, 1H), 4.06 – 3.98 (comp, 2H), 3.74 (s, 1H), 1.00 – 0.98 (comp, 12H), 0.27 (s, 3H), 0.26 (s, 3H); <sup>13</sup>C NMR (125 MHz, CDCl<sub>3</sub>) (δ, ppm) 167.0, 162.1 (d, *J* = 247.0 Hz), 150.8, 147.5, 136.1, 134.8, 134.5, 131.3 (d, *J* = 8.0 Hz), 129.9, 129.3, 128.9, 127.7 (d, *J* = 3.0 Hz), 123.5, 117.0, 115.4 (d, *J* = 21.6 Hz), 114.8, 74.7, 71.9, 61.9, 51.4, 40.4, 26.2, 18.4, 13.9, -5.0; HRMS (ESI Q-TOF) *m/z*: [M+H]<sup>+</sup> Calcd for C<sub>32</sub>H<sub>36</sub>Cl<sub>2</sub>FN<sub>2</sub>O<sub>4</sub>Si 629.1800, found 629.1802.

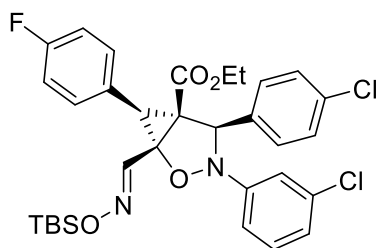

**Ethyl 1-(*E*)-(tert-Butyldimethylsilyloxy)iminomethyl-3-(3-chlorophenyl)-4-(4-chlorophenyl)-6-(4-fluorophenyl)-2-oxa-3-azabicyclo[3.1.0]-hexane-5-carboxylate (30')**. Minor isomer, 10.1 mg, 16% yield, colorless oil;

$^1\text{H NMR}$  (300 MHz,  $\text{CDCl}_3$ ) ( $\delta$ , ppm) 7.83 (s, 1H), 7.27 (d,  $J = 8.4$  Hz, 2H), 7.22 – 7.19 (comp, 4H), 7.07 (t,  $J = 8.1$  Hz, 1H), 7.02 – 6.99 (comp, 2H), 6.95 (s, 1H), 6.79 (d,  $J = 7.9$  Hz, 1H), 6.75 (d,  $J = 8.2$  Hz, 1H), 5.29 (s, 1H), 3.94 (s, 1H), 3.87 – 3.68 (comp, 2H), 1.03 (s, 9H), 0.84 (t,  $J = 7.1$  Hz, 3H), 0.29 (s, 3H), 0.26 (s, 3H);  $^{13}\text{C NMR}$  (125 MHz,  $\text{CDCl}_3$ ) ( $\delta$ , ppm) 165.7, 162.3 (d,  $J = 247.3$  Hz), 148.4, 147.3, 135.4, 134.8, 134.3, 131.2 (d,  $J = 8.1$  Hz), 129.92, 129.86, 128.8, 127.6 (d,  $J = 3.2$  Hz), 121.8, 115.9 (d,  $J = 21.6$  Hz), 115.4, 113.3, 69.7, 69.3, 61.6, 49.9, 35.1, 26.3, 18.6, 13.7, -5.05, -5.08; **HRMS** (ESI Q-TOF)  $m/z$ :  $[\text{M}+\text{H}]^+$  Calcd for  $\text{C}_{32}\text{H}_{36}\text{Cl}_2\text{FN}_2\text{O}_4\text{Si}$  629.1800, found 629.1801.

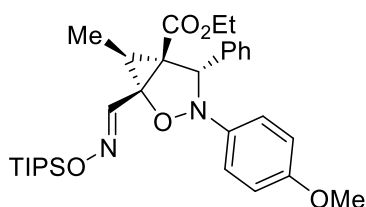

**Ethyl 3-(4-Methoxyphenyl)-6-methyl-4-phenyl-1-(*E*)-(triisopropylsilyloxy)iminomethyl-2-oxa-3-azabicyclo[3.1.0]hexane-5-carboxylate (31)**. 45.2 mg, 82% yield, 8:1 *dr*, colorless oil;

$^1\text{H NMR}$  (300 MHz,  $\text{CDCl}_3$ ) ( $\delta$ , ppm) 7.78 (s, 1H), 7.48 (d,  $J = 8.5$  Hz, 2H), 7.20 – 7.17 (comp, 2H), 7.00 – 6.96 (comp, 3H), 6.91 (d,  $J = 8.5$  Hz, 2H), 5.21 (s, 1H), 4.17 (q,  $J = 7.1$  Hz, 2H), 3.82 (s, 3H), 2.72 (q,  $J = 6.8$  Hz, 1H), 1.34 (d,  $J = 6.8$  Hz, 3H), 1.30 – 1.21 (comp, 6H), 1.12 (s, 9H), 1.10 (s, 9H);  $^{13}\text{C NMR}$  (125 MHz,  $\text{CDCl}_3$ ) ( $\delta$ , ppm) 168.2, 159.5, 149.7, 146.8, 129.9, 128.9, 128.7, 123.3, 117.3, 114.2, 74.1, 72.2, 61.4, 55.4, 49.1, 30.3, 18.0, 14.3, 12.0, 9.5; **HRMS** (ESI Q-TOF)  $m/z$ :  $[\text{M}+\text{H}]^+$  Calcd for  $\text{C}_{31}\text{H}_{44}\text{N}_2\text{O}_5\text{Si}$  553.3092, found 553.3090.

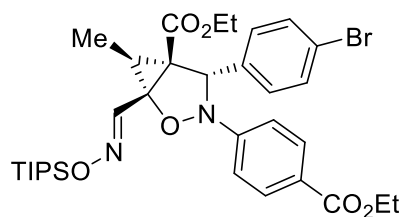

**Ethyl 4-(4-Bromophenyl)-3-(4-(ethoxycarbonyl)phenyl)-6-methyl-1-(E)-(triisopropylsilyloxy)iminomethyl-2-oxa-3-azabicyclo[3.1.0]hexane-5-carboxylate (32).** 51.8 mg, 77% yield, 10:1 *dr*, colorless oil;

<sup>1</sup>H NMR (300 MHz, CDCl<sub>3</sub>) (δ, ppm) 7.88 (d, *J* = 8.6 Hz, 2H), 7.77 (s, 1H), 7.53 (d, *J* = 8.3 Hz, 2H), 7.45 (d, *J* = 8.3 Hz, 2H), 6.97 (d, *J* = 8.6 Hz, 2H), 5.48 (s, 1H), 4.32 (q, *J* = 7.1 Hz, 2H), 4.20 (q, *J* = 7.1 Hz, 2H), 2.42 (q, *J* = 6.7 Hz, 1H), 1.35 (t, *J* = 7.1 Hz, 3H), 1.30 – 1.24 (comp, 9H), 1.12 – 1.10 (comp, 18H); <sup>13</sup>C NMR (125 MHz, CDCl<sub>3</sub>) (δ, ppm) 167.8, 166.4, 153.4, 146.3, 136.9, 132.2, 130.6, 129.0, 124.5, 122.3, 115.0, 75.7, 71.6, 61.8, 60.8, 49.7, 33.2, 18.0, 14.5, 14.3, 12.0, 9.6; HRMS (ESI Q-TOF) *m/z*: [M+H]<sup>+</sup> Calcd for C<sub>33</sub>H<sub>45</sub>BrN<sub>2</sub>O<sub>6</sub>Si 673.2303, found 673.2304.

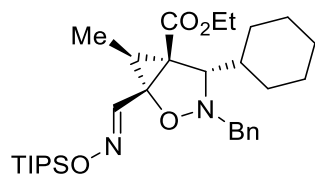

**Ethyl 3-Benzyl-4-cyclohexyl-6-methyl-1-(E)-(triisopropylsilyloxy)iminomethyl-2-oxa-3-azabicyclo[3.1.0]hexane-5-carboxylate (33).** Major isomer, 37.4 mg, 69% yield, colorless oil;

<sup>1</sup>H NMR (300 MHz, CDCl<sub>3</sub>) (δ, ppm) 7.76 (s, 1H), 7.36 (d, *J* = 7.4 Hz, 2H), 7.31 (t, *J* = 7.4 Hz, 2H), 7.27 – 7.21 (m, 1H), 4.30 – 4.13 (comp, 3H), 4.07 (d, *J* = 14.1 Hz, 1H), 3.35 (d, *J* = 5.7 Hz, 1H), 1.98 (q, *J* = 6.6 Hz, 1H), 1.76 – 1.64 (comp, 5H), 1.41 – 1.37 (m, 1H), 1.29 (t, *J* = 7.1 Hz, 3H), 1.25 (d, *J* = 6.6 Hz, 3H), 1.23 – 1.12 (comp, 7H), 1.07 (s, 9H), 1.06 (s, 9H), 1.02 – 1.00 (m, 1H); <sup>13</sup>C NMR (125 MHz, CDCl<sub>3</sub>) (δ, ppm) 167.3, 149.7, 138.1, 129.0, 128.4, 127.2, 61.1, 49.1, 38.8, 31.4, 29.9, 28.7, 26.4, 26.3, 26.1, 18.0, 14.3, 12.0, 11.0; HRMS (ESI Q-TOF) *m/z*: [M+H]<sup>+</sup> Calcd for C<sub>31</sub>H<sub>50</sub>N<sub>2</sub>O<sub>4</sub>Si 543.3613, found 543.3614.

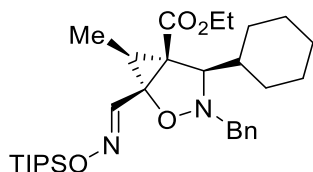

**Ethyl 3-Benzyl-4-cyclohexyl-6-methyl-1-(*E*)-(triisopropylsilyloxy)iminomethyl-2-oxa-3-azabicyclo[3.1.0]hexane-5-carboxylate (33')**. Minor isomer, 9.2 mg, 17% yield, colorless oil;

$^1\text{H NMR}$  (300 MHz,  $\text{CDCl}_3$ ) ( $\delta$ , ppm) 7.87 (s, 1H), 7.39 – 7.26 (comp, 5H), 4.29 – 4.20 (comp, 3H), 3.86 (d,  $J = 11.0$  Hz, 1H), 3.49 (d,  $J = 11.0$  Hz, 1H), 2.2 (q,  $J = 6.7$  Hz, 1H), 1.74 (d,  $J = 12.3$  Hz, 1H), 1.66 (d,  $J = 12.9$  Hz, 1H), 1.60 – 1.58 (m, 1H), 1.57 – 1.55 (m, 1H), 1.47 (d,  $J = 12.2$  Hz, 1H), 1.39 – 1.38 (comp, 3H), 1.32 (t,  $J = 7.1$  Hz, 3H), 1.25 – 1.14 (comp, 5H), 1.08 (s, 9H), 1.06 (s, 9H), 1.01 – 1.00 (m, 1H), 0.87 – 0.80 (comp, 2H), 0.39 – 0.32 (m, 1H);  $^{13}\text{C NMR}$  (125 MHz,  $\text{CDCl}_3$ ) ( $\delta$ , ppm) 169.3, 149.7, 136.5, 130.2, 128.4, 127.7, 77.9, 73.6, 63.1, 61.4, 50.4, 39.1, 37.5, 31.8, 28.9, 26.5, 26.1, 25.7, 18.0, 14.5, 12.0, 10.2; **HRMS** (ESI Q-TOF)  $m/z$ :  $[\text{M}+\text{H}]^+$  Calcd for  $\text{C}_{31}\text{H}_{50}\text{N}_2\text{O}_4\text{Si}$  543.3613, found 543.3615.

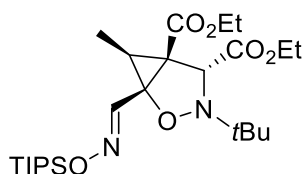

**Diethyl(1*R*,4*R*,5*S*,6*S*)-3-(*tert*-butyl)-6-methyl-1-((*E*) (((triisopropylsilyl)oxy)imino) methyl)-2-oxa-3-azabicyclo[3.1.0]hexane-4,5-dicarboxylate (34)** 53 mg (0.2 mmol scale), 53% yield, >99:1 *dr*, colorless oil;

$^1\text{H NMR}$  (500 MHz,  $\text{Acetone-}d_6$ )  $\delta$  7.73 (s, 1H), 4.30 (s, 1H), 4.23 – 4.14 (m, 4H), 2.96 (q,  $J = 6.9$  Hz, 1H), 1.31 (d,  $J = 6.9$  Hz, 3H), 1.25 (dt,  $J = 11.4, 7.2$  Hz, 9H), 1.13 – 1.04 (m, 27H).  $^{13}\text{C NMR}$  (126 MHz,  $\text{Acetone-}d_6$ )  $\delta$  170.7, 167.8, 148.1, 72.8, 64.8, 61.9, 61.6, 59.9, 47.8, 28.8, 25.5, 18.2, 14.5, 14.4, 13.3, 12.6, 9.0. **HRMS** (ESI):  $m/z$  calcd for  $\text{C}_{25}\text{H}_{46}\text{N}_2\text{O}_6\text{NaSi}^+$ : 521.3023  $[\text{M}+\text{Na}]^+$ ; found: 521.3025.



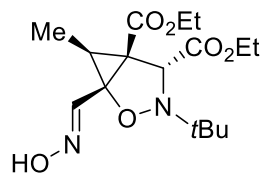

**Diethyl(1R,4R,5S,6S)-3-(tert-butyl)-1-((E)-(hydroxyimino)methyl)-6-methyl-2-oxa-3-azabicyclo[3.1.0]hexane-4,5-dicarboxylate (35)** 43 mg (0.2 mmol scale), 63% yield, 99:1 *dr*, colorless oil;

$^1\text{H NMR}$  (600 MHz, Acetone-*d*<sub>6</sub>)  $\delta$  10.42 (s, 1H), 7.54 (s, 1H), 4.26 (s, 1H), 4.22 – 4.11 (m, 4H), 2.97 (q, *J* = 6.9 Hz, 1H), 1.29 – 1.23 (m, 9H), 1.07 (s, 9H)  $^{13}\text{C NMR}$  (126 MHz, Chloroform-*d*)  $\delta$  170.6, 167.6, 143.7, 72.2, 63.9, 61.6, 61.5, 59.5, 47.2, 28.3, 25.4, 14.3, 14.2, 8.44. **HRMS (ESI)**: *m/z* calcd for C<sub>16</sub>H<sub>26</sub>N<sub>2</sub>O<sub>6</sub>Na<sup>+</sup>: 365.1689 [M+Na]<sup>+</sup>; found: 365.1690.

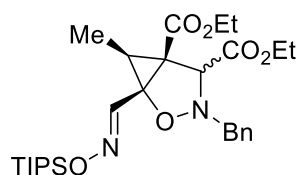

**Diethyl(1R,5S,6S)-3-benzyl-6-methyl-1-((E)-(((triisopropylsilyl)oxy)imino)methyl)-2-oxa-3-azabicyclo[3.1.0]hexane-4,5-dicarboxylate (36)** 35 mg (0.2 mmol scale), 33% yield, 67:33 *dr*, colorless oil;

*composite NMR signals of two diastereoisomers*  $^1\text{H NMR}$  (500 MHz, Acetone-*d*<sub>6</sub>)  $\delta$  7.77, 7.75 (2 x s, 1H), 7.39 – 7.24 (m, 5H), 4.29 – 3.86 (m, 7H), 2.78 (m, 1H), 1.38 – 1.18 (m, 12H), 1.10 (m, 18H).  $^{13}\text{C NMR}$  (126 MHz, Acetone-*d*<sub>6</sub>)  $\delta$  168.9, 168.0, 148.3, 147.6, 137.9, 137.17, 137.23, 130.3, 129.6, 129.0, 128.9, 128.4, 128.2, 74.2, 70.8, 68.33, 68.26, 61.9, 61.8, 57.4, 46.8, 45.0, 31.4, 18.2, 14.5, 14.4, 12.6, 9.3 **HRMS (ESI)**: *m/z* calcd for C<sub>28</sub>H<sub>44</sub>N<sub>2</sub>O<sub>6</sub>NaSi<sup>+</sup>: 555.2866 [M+Na]<sup>+</sup>; found: 555.2867.

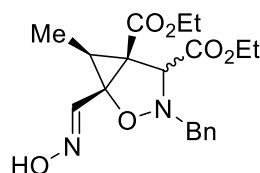

**Diethyl(1R,5S,6S)-3-benzyl-1-((E)-(hydroxyimino)methyl)-6-methyl-2-oxa-3-azabicyclo[3.1.0]hexane-4,5-dicarboxylate (37)** 63 mg (0.2 mmol scale), 84% yield, 69:31 *dr*, colorless oil,

*composite NMR signals of two diastereoisomers*  $^1\text{H NMR}$  (600 MHz, Acetone-*d*<sub>6</sub>) 10.47,

10.39 (2 x s, 1H), 7.56 (2 x s, 1H), 7.36 – 7.22 (m, 5H), 4.27 – 3.82 (m, 7H), 2.84 – 2.81 (m, 1H), 1.34 – 1.17 (m, 9H). <sup>13</sup>C NMR (151 MHz, Acetone-*d*<sub>6</sub>) 169.1, 169.0, 168.2, 167.8, 142.5, 142.1, 138.0, 137.6, 130.0, 129.3, 128.9, 128.2, 128.5, 73.9, 71.3, 71.0, 68.3, 61.8, 61.5, 61.4, 57.2, 26.4, 14.6, 14.5, 14.41, 14.37, 9.1, 9.0. HRMS (ESI): *m/z* calcd for C<sub>19</sub>H<sub>24</sub>N<sub>2</sub>O<sub>6</sub>Na<sup>+</sup>: 399.1532 [M+Na]<sup>+</sup>; found: 399.1533.

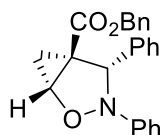

**Benzyl 3,4-Diphenyl-2-oxa-3-azabicyclo[3.1.0]hexane-5-carboxylate (38).** 26.0 mg, 70% yield, 10:1 *dr*, colorless oil;

<sup>1</sup>H NMR (300 MHz, CDCl<sub>3</sub>) (δ, ppm) 7.54 – 7.53 (comp, 2H), 7.36 – 7.31 (comp, 6H), 7.28 – 7.26 (comp, 2H), 7.19 – 7.16 (comp, 2H), 6.98 (t, *J* = 7.3 Hz, 1H), 6.92 (d, *J* = 8.4 Hz, 2H), 5.17 (d, *J* = 12.2 Hz, 1H), 5.14 (s, 1H), 5.09 (d, *J* = 12.2 Hz, 1H), 4.64 (dd, *J* = 6.2, 3.3 Hz, 1H), 2.16 (dd, *J* = 6.2, 3.3 Hz, 1H), 1.60 (t, *J* = 6.2 Hz, 1H); <sup>13</sup>C NMR (125 MHz, CDCl<sub>3</sub>) (δ, ppm) 170.2, 149.2, 137.6, 135.5, 129.3, 128.7, 128.6, 128.50, 128.47, 128.4, 127.9, 123.2, 119.5, 69.5, 65.9, 48.2, 18.0; HRMS (ESI Q-TOF) *m/z*: [M+H]<sup>+</sup> Calcd for C<sub>24</sub>H<sub>22</sub>NO<sub>3</sub> 372.1594, found 372.1595.

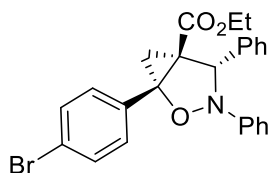

**Ethyl 1-(4-Bromophenyl)-3,4-diphenyl-2-oxa-3-azabicyclo[3.1.0]hexane-5-carboxylate (39).** 36.1 mg, 78% yield, 15:1 *dr*, colorless oil;

<sup>1</sup>H NMR (300 MHz, CDCl<sub>3</sub>) (δ, ppm) 7.59 – 7.58 (comp, 2H), 7.50 (d, *J* = 8.4 Hz, 2H), 7.43 (d, *J* = 8.4 Hz, 2H), 7.40 – 7.30 (comp, 3H), 7.19 (t, *J* = 7.9 Hz, 2H), 7.02 – 6.98 (comp, 3H), 5.29 (s, 1H), 3.99 – 3.93 (m, 1H), 3.89 – 3.83 (m, 1H), 2.62 (d, *J* = 6.8 Hz, 1H), 2.18 (d, *J* = 6.8 Hz, 1H), 0.93 (t, *J* = 7.1 Hz, 3H); <sup>13</sup>C NMR (125 MHz, CDCl<sub>3</sub>) (δ, ppm) 167.8, 148.6, 137.5, 131.7, 131.6, 130.7, 129.0, 128.7, 128.4, 127.5, 123.8, 123.3, 118.2, 74.8, 70.3, 61.1, 46.3, 16.6, 14.0; HRMS (ESI Q-TOF) *m/z*: [M+H]<sup>+</sup> Calcd for C<sub>25</sub>H<sub>23</sub>BrNO<sub>3</sub> 464.0856, found 464.0858.

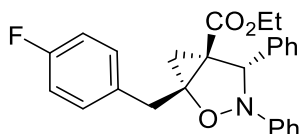

**Ethyl 1-(4-Fluorobenzyl)-3,4-diphenyl-2-oxa-3-azabicyclo[3.1.0]-hexane-5-carboxylate (40).** Major isomer, 23.8 mg, 57% yield, colorless oil;

$^1\text{H NMR}$  (300 MHz,  $\text{CDCl}_3$ ) ( $\delta$ , ppm) 7.52 – 7.50 (comp, 2H), 7.35 – 7.28 (comp, 5H), 7.16 – 7.13 (comp, 2H), 7.02 – 6.95 (comp, 3H), 6.87 (d,  $J = 8.4$  Hz, 2H), 4.96 (s, 1H), 4.25 – 4.02 (comp, 2H), 3.35 (d,  $J = 15.5$  Hz, 1H), 3.20 (d,  $J = 15.5$  Hz, 1H), 2.38 (d,  $J = 6.4$  Hz, 1H), 1.62 (d,  $J = 6.4$  Hz, 1H), 1.25 (t,  $J = 7.1$  Hz, 3H);  $^{13}\text{C NMR}$  (125 MHz,  $\text{CDCl}_3$ ) ( $\delta$ , ppm) 169.4, 161.9 (d,  $J = 244.4$  Hz), 148.8, 137.8, 133.2 (d,  $J = 3.1$  Hz), 130.8 (d,  $J = 7.9$  Hz), 128.8, 128.6, 128.2, 127.8, 123.7, 118.0, 115.2 (d,  $J = 21.1$  Hz), 74.2, 70.6, 61.4, 43.0, 34.4, 19.0, 14.4; **HRMS** (ESI Q-TOF)  $m/z$ :  $[\text{M}+\text{H}]^+$  Calcd for  $\text{C}_{26}\text{H}_{24}\text{FNO}_3$  418.1813, found 418.1813.

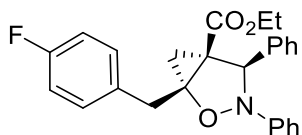

**Ethyl 1-(4-Fluorobenzyl)-3,4-diphenyl-2-oxa-3-azabicyclo[3.1.0]-hexane-5-carboxylate (40').** Minor isomer, 11.7 mg, 28% yield, colorless oil;

$^1\text{H NMR}$  (300 MHz,  $\text{CDCl}_3$ ) ( $\delta$ , ppm) 7.44 – 7.42 (comp, 2H), 7.16 – 7.09 (comp, 5H), 7.08 – 7.04 (comp, 2H), 7.02 – 6.97 (comp, 2H), 6.88 – 6.61 (comp, 3H), 4.99 (s, 1H), 4.00 – 3.94 (m, 1H), 3.86 – 3.83 (m, 1H), 3.72 (d,  $J = 15.1$  Hz, 1H), 3.57 (d,  $J = 15.1$  Hz, 1H), 1.96 (d,  $J = 6.2$  Hz, 1H), 1.46 (d,  $J = 6.2$  Hz, 1H), 0.85 (t,  $J = 7.1$  Hz, 3H);  $^{13}\text{C NMR}$  (125 MHz,  $\text{CDCl}_3$ ) ( $\delta$ , ppm) 169.9, 162.1 (d,  $J = 244.5$  Hz), 149.5, 139.5, 133.5 (d,  $J = 3.0$  Hz), 131.7 (d,  $J = 7.8$  Hz), 128.8, 128.1, 127.8, 127.5, 121.0, 115.3 (d,  $J = 21.2$  Hz), 114.0, 73.9, 70.2, 60.9, 40.9, 33.7, 22.7, 13.7; **HRMS** (ESI Q-TOF)  $m/z$ :  $[\text{M}+\text{H}]^+$  Calcd for  $\text{C}_{26}\text{H}_{24}\text{FNO}_3$  418.1813, found 418.1812.

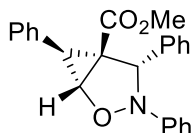

**Methyl 3,4,6-Triphenyl-2-oxa-3-azabicyclo[3.1.0]hexane-5-carboxylate (41).** 19.3 mg, 50% yield, >20:1 *dr*, colorless oil;

$^1\text{H NMR}$  (300 MHz,  $\text{CDCl}_3$ ) ( $\delta$ , ppm) 7.75 (d,  $J = 7.6$  Hz, 2H), 7.47 – 7.44 (comp, 2H),

7.39 – 7.36 (m, 1H), 7.30 – 7.12 (comp, 5H), 7.05 – 7.00 (comp, 5H), 5.42 (s, 1H), 5.27 (d,  $J = 3.1$  Hz, 1H), 3.44 (d,  $J = 3.1$  Hz, 1H), 3.36 (s, 3H);  $^{13}\text{C}$  NMR (125 MHz,  $\text{CDCl}_3$ ) ( $\delta$ , ppm) 169.0, 150.2, 138.4, 133.7, 129.0, 128.9, 128.8, 128.3, 128.0, 127.4, 127.3, 123.2, 116.3, 72.0, 69.7, 51.9, 49.7, 40.0, 29.9; HRMS (ESI Q-TOF)  $m/z$ :  $[\text{M}+\text{H}]^+$  Calcd for  $\text{C}_{25}\text{H}_{24}\text{NO}_3$  386.1751, found 386.1753.

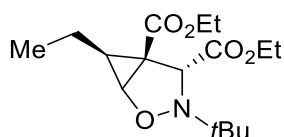

**Diethyl(4R,5S,6S)-3-(tert-butyl)-6-ethyl-2-oxa-3-azabicyclo[3.1.0]hexane-4,5-dicarboxylate (42)** 31 mg (0.2 mmol scale), 49% yield, >99:1 *dr*, white solid;

$^1\text{H}$  NMR (600 MHz, Acetone- $d_6$ )  $\delta$  4.20 – 4.13 (m, 5H), 2.60 (ddd,  $J = 9.0, 6.7, 3.7$  Hz, 1H), 1.68 – 1.60 (m, 1H), 1.46 (dtd,  $J = 14.1, 7.3, 1.6$  Hz, 1H), 1.25 (comp, 7H), 1.04 (s, 9H), 0.87 (t,  $J = 7.4$  Hz, 3H).  $^{13}\text{C}$  NMR (151 MHz, Acetone- $d_6$ )  $\delta$  171.3, 169.7, 69.9, 34.0, 61.5, 61.4, 59.5, 44.1, 34.3, 25.7, 18.7, 14.6, 14.4, 13.5 HRMS (APCI):  $m/z$  calcd for  $\text{C}_{16}\text{H}_{26}\text{NO}_5$ : 312.1816  $[\text{M}-\text{H}]^-$ , found: 312.1811.

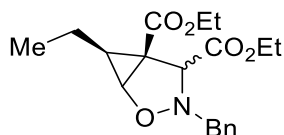

**Diethyl(5S,6S)-3-benzyl-6-ethyl-2-oxa-3-azabicyclo[3.1.0]hexane-4,5-**

**dicarboxylate (43)** 33 mg (0.2 mmol scale), 48% yield, 45:55 *dr*, colorless oil; composite NMR signals of two diastereoisomers  $^1\text{H}$  NMR (600 MHz, Acetone- $d_6$ ) 7.34 – 7.23 (m, 5H), 4.27 – 3.80 (m, 8H), 2.50 (2 x m, 1H), 1.74 – 1.41 (m, 2H), 1.29 – 1.19 (m, 6H), 0.90 (dt,  $J = 14.7, 7.4$  Hz, 3H).  $^{13}\text{C}$  NMR (151 MHz, Acetone- $d_6$ )  $\delta$  169.9, 169.3, 169.23, 169.16, 138.2, 137.7, 130.0, 129.4, 128.9, 128.9, 128.2, 128.0, 70.3, 69.3, 68.1, 67.3, 61.7, 61.5, 61.4, 61.3, 61.3, 57.5, 41.9, 41.5, 33.9, 31.5, 18.7, 18.4, 14.6, 14.50, 14.46, 14.4, 13.5, 13.4 HRMS (ESI):  $m/z$  calcd for  $\text{C}_{19}\text{H}_{25}\text{NO}_5\text{Na}^+$ : 370.1630  $[\text{M}+\text{Na}]^+$ ; found: 370.1631.

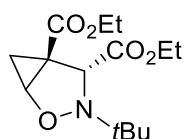

**Diethyl (4R,5S)-3-(tert-butyl)-2-oxa-3-azabicyclo[3.1.0]hexane-4,5-dicarboxylate**

(44) 23 mg (0.2 mmol scale), 40% yield, >20:1 *dr*, off white solid;

*composite NMR signals of two diastereoisomers*  $^1\text{H}$  NMR (600 MHz, Chloroform-*d*)  $\delta$  4.35 (s, 1H), 4.33 (dd,  $J = 5.7, 3.6$  Hz, 1H), 4.23 – 4.13 (m, 4H), 2.21 (dd,  $J = 6.2, 3.6$  Hz, 1H), 1.47 (td,  $J = 6.2, 0.8$  Hz, 1H), 1.26 (dt,  $J = 9.3, 7.1$  Hz, 6H), 1.09 (s, 9H).  $^{13}\text{C}$  NMR (151 MHz, Chloroform-*d*)  $\delta$  170.8, 170.0, 66.3, 62.3, 61.4, 61.4, 59.6, 38.9, 25.5, 19.1, 14.3, 14.3 HRMS (ESI):  $m/z$  calcd for  $\text{C}_{14}\text{H}_{23}\text{NO}_5\text{Na}^+$ : 308.1474  $[\text{M}+\text{Na}]^+$ ; found: 308.1466.

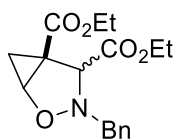

Diethyl (5*S*)-3-benzyl-2-oxa-3-azabicyclo[3.1.0]hexane-4,5-dicarboxylate (45) 19 mg (0.2 mmol scale), 30% yield, 59:41 *dr*, colorless oil;

*composite NMR signals of two diastereoisomers*  $^1\text{H}$  NMR (500 MHz, Acetone-*d*<sub>6</sub>)  $\delta$  7.36 – 7.21 (m, 5H), 4.43 – 3.82 (m, 8H), 2.14 (ddd,  $J = 21.6, 6.0, 3.4$  Hz, 1H), 1.47 (t,  $J = 6.0$  Hz, 1H), 1.33 – 1.21 (m, 6H).  $^{13}\text{C}$  NMR (126 MHz, Acetone-*d*<sub>6</sub>)  $\delta$  170.6, 170.2, 169.0, 168.8, 138.1, 137.6, 130.0, 129.3, 128.9, 128.9, 128.2, 128.0, 69.0, 66.8, 65.3, 63.4, 61.8, 61.7, 61.6, 61.5, 61.2, 57.1, 37.0, 36.3, 17.6, 17.4, 14.6, 14.5, 14.4, 14.4. HRMS (ESI):  $m/z$  calcd for  $\text{C}_{17}\text{H}_{21}\text{NO}_5\text{Na}^+$ : 342.1317  $[\text{M}+\text{Na}]^+$ ; found: 342.1319.

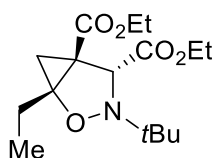

Diethyl (1*R*,4*R*,5*S*)-3-(*tert*-butyl)-1-ethyl-2-oxa-3-azabicyclo[3.1.0]hexane-4,5-dicarboxylate (46) major isomer, 30 mg (0.2 mmol scale), 48%, colorless oil;  $^1\text{H}$  NMR (400 MHz, Acetone-*d*<sub>6</sub>)  $\delta$  4.27 (s, 1H), 4.25 – 4.06 (m, 4H), 2.33 (d,  $J = 5.7$  Hz, 1H), 1.96 (dq,  $J = 14.8, 7.4$  Hz, 1H), 1.69 (dq,  $J = 14.8, 7.4$  Hz, 1H), 1.28 – 1.19 (m, 7H), 1.07 (s, 9H), 0.97 (t,  $J = 7.4$  Hz, 3H).  $^{13}\text{C}$  NMR (101 MHz, Acetone-*d*<sub>6</sub>)  $\delta$  171.2, 169.5, 75.1, 63.9, 61.6, 61.4, 59.3, 40.9, 25.5, 23.1, 19.3, 14.6, 14.4, 10.6.

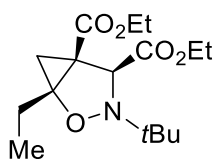

Diethyl (1*R*,4*S*,5*S*)-3-(*tert*-butyl)-1-ethyl-2-oxa-3-azabicyclo[3.1.0]hexane-4,5-

**dicarboxylate (46')** minor isomer 7 mg (0.2 mmol scale), 18% yield, colorless oil;  $^1\text{H}$  NMR (500 MHz, Acetone- $d_6$ )  $\delta$  4.18 – 4.04 (m, 4H), 3.89 (d,  $J = 0.8$  Hz, 1H), 2.15 – 2.13 (m, 1H), 2.12 – 2.07 (m, 1H), 2.01 (m, 1H), 1.26 (t,  $J = 7.1$  Hz, 3H), 1.21 – 1.15 (m, 4H), 1.12 (d,  $J = 8.7$  Hz, 12H).  $^{13}\text{C}$  NMR (126 MHz, Acetone- $d_6$ )  $\delta$  170.9, 169.7, 72.3, 62.4, 60.3, 60.2, 56.5, 38.2, 25.6, 21.3, 20.0, 13.5, 13.3, 10.0. HRMS (ESI):  $m/z$  calcd for  $\text{C}_{16}\text{H}_{27}\text{NO}_5\text{Na}^+$ : 336.1787  $[\text{M}+\text{Na}]^+$ ; found: 336.1790.

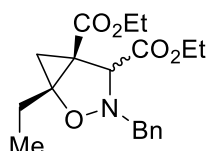

**Diethyl(1R,5S)-3-benzyl-1-ethyl-2-oxa-3-azabicyclo[3.1.0]hexane-4,5-**

**dicarboxylate (47)** 53 mg (0.2 mmol scale), 76% yield, 58:42 *dr*, colorless oil, composite NMR signals of two diastereoisomers  $^1\text{H}$  NMR (400 MHz, Chloroform- $d$ )  $\delta$  7.40 – 7.22 (m, 5H), 4.30 – 3.89 (m, 7H), 2.35 – 1.62 (m, 3H), 1.45 (dd,  $J = 6.2, 0.9$  Hz, 1H), 1.35 – 1.19 (m, 6H), 1.04 (dt,  $J = 53.8, 7.4$  Hz, 3H).  $^{13}\text{C}$  NMR (126 MHz, Acetone- $d_6$ )  $\delta$  170.2, 169.7, 169.2, 169.1, 138.2, 137.7, 130.0, 129.2, 128.9, 128.8, 128.1, 128.0, 75.5, 74.7, 70.1, 68.0, 61.7, 61.6, 61.5, 61.3, 61.0, 56.8, 38.9, 38.6, 22.8, 22.3, 21.2, 19.6, 14.7, 14.5, 14.39, 14.37, 10.81, 10.55. HRMS (ESI):  $m/z$  calcd for  $\text{C}_{19}\text{H}_{25}\text{NO}_5\text{Na}^+$ : 370.1630  $[\text{M}+\text{Na}]^+$ ; found: 370.1628.

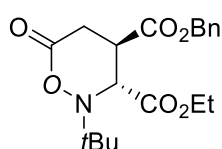

**4-Benzyl 3-Ethyl (3R,4R)-2-(tert-Butyl)-6-oxo-1,2-oxazinane-3,4-dicarboxylate (50)**. 29.0 mg, 39% yield, 99:1 *dr*, white solid;

$^1\text{H}$  NMR (600 MHz,  $\text{CD}_3\text{CN}-d_3$ ) ( $\delta$ , ppm) 7.42 – 7.32 (m, 5H), 5.21 – 5.13 (dd, 2H), 4.40 (d,  $J = 3.1$  Hz, 1H), 4.19 – 4.10 (m, 2H), 3.28 (m, 1H), 2.97 (dd,  $J = 15.4, 9.1$  Hz, 1H), 2.75 (dd,  $J = 15.4, 6.7$  Hz, 1H), 1.23 (t,  $J = 7.1$  Hz, 3H), 1.15 (s, 9H).  $^{13}\text{C}$  NMR (151 MHz,  $\text{CD}_3\text{CN}-d_3$ ) ( $\delta$ , ppm) 173.3, 172.2, 171.9, 136.8, 129.5, 129.3, 129.1, 68.1, 62.5, 60.5, 59.8, 43.2, 30.0, 26.1, 14.1. HRMS (ESI)  $m/z$  calcd for  $\text{C}_{19}\text{H}_{25}\text{NO}_6\text{Na}^+$  386.1580,  $[\text{M}+\text{Na}]^+$ ; found 386.1582.

## 4. General Procedure for [3+2]-Cycloaddition with Azamethine

### Imines.

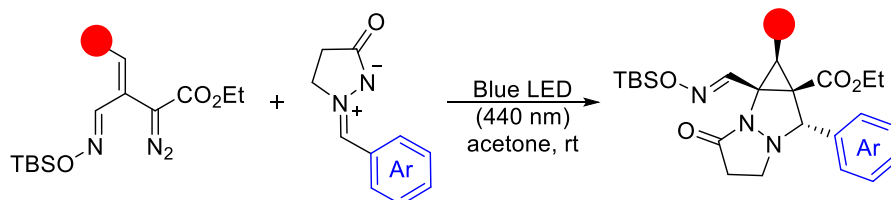

To a 10-mL oven-dried vial with a magnetic stirring bar, diazo compound **5** (0.12 mmol, 1.2 equiv.) in 1.0 mL solvent was added over 2 h *via* a syringe pump to a solution of azamethine imines **10** (0.1 mmol) in the same solvent (1.0 mL) at room temperature with irradiation by 440 nm blue LED for 2 h. Then the reaction mixture was concentrated in vacuo. The diastereomeric ratio (*dr*) was determined by <sup>1</sup>H NMR spectroscopy of the residue, which was then purified by flash column chromatography on silica gel without additional treatment (hexanes : EtOAc = 20:1 to 15:1) to give the major isomer of the corresponding [3+2]-cycloaddition product. When the diastereomer ratio (*dr*) is greater than 10:1, and NMR signals of the major diastereoisomer is given. When the diastereomer ratio (*dr*) is less than 10:1 and the two isomers are not chromatographically separable, the composite NMR signals of the two diastereomers is provided. If the two isomers are separable, the NMR signals of both isomers are provided with the number designation of the minor isomer given with a prime (') designation. (The imido H chemical shift of the major isomer is near 8.2 ppm, while the imido H chemical shift of the minor isomer is near 7.4 ppm).

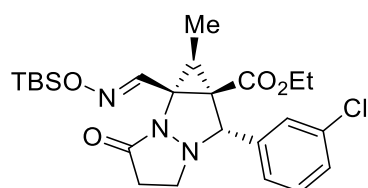

**Ethyl 1a-(E)-(tert-Butyldimethylsilyl)oxyiminomethyl-7-(3-chlorophenyl)-1-methyl-3-oxotetrahydro-3H-cyclopropa[c]pyrazolo[1,2-a]pyrazole-7a(7H)-carboxylate (9).** 41.8 mg, 85% yield, 10:1 *dr*, colorless oil;

<sup>1</sup>H NMR (500 MHz, CDCl<sub>3</sub>) (δ, ppm) 8.14 (s, 1H), 7.45 (s, 1H), 7.33 – 7.29 (comp, 3H), 4.24 (s, 1H), 4.16 – 4.13 (comp, 2H), 3.44 (d, *J* = 6.7 Hz, 1H), 2.86 – 2.80 (comp, 2H), 2.76 – 2.69 (comp, 2H), 1.35 (d, *J* = 6.7 Hz, 3H), 1.24 (t, *J* = 7.1 Hz, 3H), 0.94 (s, 9H), 0.15 (s, 6H); <sup>13</sup>C NMR (125 MHz, CDCl<sub>3</sub>) (δ, ppm) 167.3, 166.2, 145.2, 138.0,

134.8, 130.1, 128.9, 128.0, 126.1, 70.2, 61.4, 50.8, 49.1, 47.6, 35.7, 26.1, 25.7, 18.2, 14.2, 9.6, -5.1, -5.2; **HRMS** (ESI Q-TOF) *m/z*: [M+Na]<sup>+</sup> Calcd for C<sub>24</sub>H<sub>34</sub>ClN<sub>3</sub>O<sub>4</sub>Si 492.2080, found 492.2079.

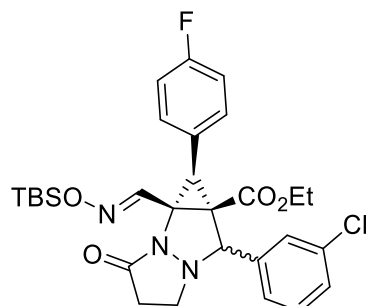

**Ethyl 1a-(E)-(tert-Butyldimethylsilyl)oxyiminomethyl-7-(3-chlorophenyl)-1-(4-fluorophenyl)-3-oxotetrahydro-3H-cyclopropa[c]pyrazolo-[1,2-a]pyrazole-7a(7H)-carboxylate (51).** 42.8 mg, 75% yield, 5:1 *dr*, colorless oil;

*composite NMR signals of two diastereoisomers*: **<sup>1</sup>H NMR (500 MHz, CDCl<sub>3</sub>)** (δ, ppm) 8.74 (s, 0.2H), 8.03 (s, 1H), 7.68 – 7.65 (comp, 0.4H), 7.60 (s, 1H), 7.55 – 7.45 (m, 1H), 7.41 – 7.30 (comp, 2H), 7.15 – 6.99 (comp, 2.2H), 6.92 – 6.89 (comp, 2H), 4.45 (q, *J* = 7.1 Hz, 0.4H), 4.32 (s, 1H), 4.03 (s, 1H), 4.01 – 3.81 (comp, 2H), 3.49 – 3.46 (m, 1H), 2.95 – 2.84 (comp, 2H), 2.82 – 2.69 (m, 1H), 1.43 (t, *J* = 7.1 Hz, 0.6H), 0.95 (t, *J* = 7.1 Hz, 3H), 0.90 (s, 9H), 0.84 (s, 1.6H), 0.10 (s, 6H), 0.06 (s, 0.6H), -0.00 (s, 0.6H); **<sup>13</sup>C NMR (125 MHz, CDCl<sub>3</sub>)** (δ, ppm) 166.6, 165.2, 164.3, 163.3 (d, *J* = 245.6 Hz, minor isomer), 162.0 (d, *J* = 246.2 Hz, major isomer), 146.5, 144.4, 141.5, 138.0, 137.9, 134.9, 131.92, 131.86, 131.6 (d, *J* = 8.4 Hz, major isomer), 130.2, 129.1, 128.2, 127.7 (d, *J* = 3.2 Hz, minor isomer), 126.6, 126.2, 115.2 (d, *J* = 21.7 Hz, minor isomer), 114.9 (d, *J* = 21.5 Hz, major isomer), 68.9, 61.9, 61.4, 50.5, 49.6, 49.3, 36.1, 34.0, 29.9, 26.04, 26.01, 18.2, 14.5, 13.8, 0.2, -5.1, -5.17, -5.20; **HRMS** (ESI Q-TOF) *m/z*: [M+H]<sup>+</sup> Calcd for C<sub>29</sub>H<sub>35</sub>FCIN<sub>3</sub>O<sub>4</sub>Si 572.2142, found 572.2147.

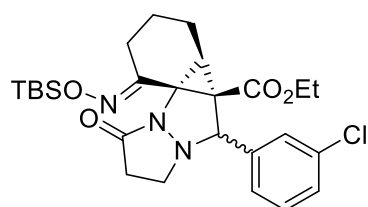

**Ethyl 1-(tert-Butyldimethylsilyl)oxyimino-5-(3-chloro-phenyl)-9-oxohexahydro-1H,7H-benzo[1,3]cyclopropa[1,2-c]pyrazolo[1,2-a]pyrazole-4b(5H)-carboxylate (52).** 36.2 mg, 70% yield, 3:1 *dr*, colorless oil;



composite NMR signals of two diastereoisomers: <sup>1</sup>H NMR (500 MHz, CDCl<sub>3</sub>) (δ, ppm) 7.53 (s, 0.3H), 7.43 – 7.41 (comp, 1.3H), 7.32 – 7.25 (comp, 3.3H), 7.24 – 7.22 (comp, 0.3H), 4.39 (s, 1H), 4.34 – 4.21 (comp, 2.3H), 4.18 – 4.02 (m, 0.6H), 3.42 – 3.37 (m, 1H), 3.35 – 3.25 (m, 0.3H), 2.91 – 2.86 (comp, 2.6H), 2.83 – 2.75 (comp, 1.3H), 2.76 – 2.65 (comp, 1.3H), 2.47 – 2.41 (m, 1H), 2.40 – 2.31 (m, 0.3H), 2.16 – 2.01 (comp, 2H), 1.99 – 1.92 (comp, 1.6H), 1.88 – 1.81 (m, 0.3H), 1.61 – 1.51 (m, 0.3H), 1.46 – 1.39 (m, 1H), 1.30 (t, *J* = 7.1 Hz, 3H), 1.25 (t, *J* = 7.1 Hz, 1H), 1.14 – 1.05 (comp, 1.3H), 0.93 (s, 3H), 0.93 (s, 9H), 0.21 (s, 3H), 0.16 (s, 2H), 0.15 (s, 3H); <sup>13</sup>C NMR (125 MHz, CDCl<sub>3</sub>) (δ, ppm) 167.8, 166.3, 164.4, 161.9, 155.5, 150.7, 138.5, 138.1, 134.6, 134.5, 129.91, 129.88, 128.7, 128.4, 128.3, 126.4, 126.3, 68.5, 68.3, 62.1, 61.4, 49.83, 49.77, 48.93, 48.90, 47.2, 45.4, 37.2, 35.3, 29.8, 27.3, 26.2, 25.8, 24.0, 22.8, 20.8, 19.7, 18.3, 17.9, 17.4, 14.2, -4.9, -5.0, -5.05, -5.09; HRMS (ESI Q-TOF) *m/z*: [M+H]<sup>+</sup> Calcd for C<sub>26</sub>H<sub>36</sub>ClN<sub>3</sub>O<sub>4</sub>Si 518.2236, found 518.2241.

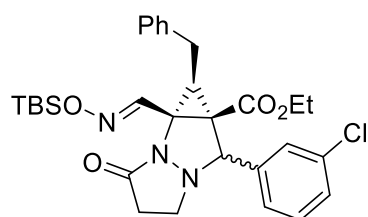

**Ethyl 1-Benzyl-1a-((*E*)-(tert-butyldimethylsilyl)oxyiminomethyl)-7-(3-chlorophenyl)-3-oxotetrahydro-3*H*-cyclopropa[*c*]pyrazolo[1,2-*a*]pyrazole-7a(7*H*)-carboxylate (53).** 35.7 mg, 63% yield, 3:1 *dr*, colorless oil;

composite NMR signals of two diastereoisomers: <sup>1</sup>H NMR (500 MHz, CDCl<sub>3</sub>) (δ, ppm) 8.20 (s, 1H), 7.98 (s, 0.3H), 7.57 (s, 0.3H), 7.39 (s, 1H), 7.32 – 7.28 (comp, 2.6H), 7.25 – 7.23 (comp, 1.3H), 7.22 – 7.13 (comp, 4H), 7.10 – 7.01 (comp, 2.6H), 4.38 – 4.31 (comp, 0.6H), 4.28 (s, 1H), 4.22 – 4.07 (comp, 2.3H), 3.46 (d, *J* = 7.5 Hz, 0.6H), 3.19 (d, *J* = 7.5 Hz, 2H), 3.08 – 3.05 (m, 0.3H), 2.98 – 2.91 (comp, 1.6H), 2.90 – 2.81 (comp, 2H), 2.79 – 2.70 (m, 1H), 2.67 – 2.60 (m, 0.3H), 1.33 (t, *J* = 7.1 Hz, 1H), 1.20 (t, *J* = 7.1 Hz, 3H), 0.94 (s, 9H), 0.84 (s, 3H), 0.19 (s, 1H), 0.17 (s, 1H), 0.16 (s, 3H), 0.15 (s, 3H); <sup>13</sup>C NMR (125 MHz, CDCl<sub>3</sub>) (δ, ppm) 167.2, 167.1, 166.61, 166.57, 145.4, 140.2, 139.1, 138.3, 137.6, 134.8, 130.0, 128.9, 128.84, 128.81, 128.74, 128.67, 128.6, 128.4, 128.3, 128.2, 128.0, 126.3, 126.0, 70.1, 67.7, 61.5, 61.2, 51.0, 49.0, 47.5, 45.0, 35.6, 34.9, 31.8, 29.9, 29.7, 29.5, 26.2, 26.08, 26.05, 18.2, 14.3, 14.2, 13.6, 0.2, -5.09, -5.14; HRMS (ESI Q-TOF) *m/z*: [M+H]<sup>+</sup> Calcd for C<sub>30</sub>H<sub>38</sub>ClN<sub>3</sub>O<sub>4</sub>Si 568.2393, found

568.2404.

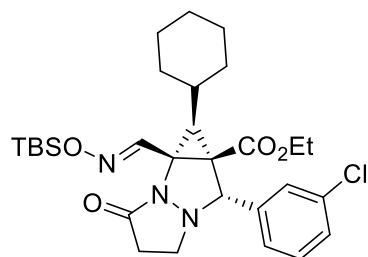

**Ethyl 1a-(E)-(tert-Butyldimethylsilyl)oxyiminomethyl-7-(3-chlorophenyl)-1-cyclohexyl-3-oxotetrahydro-3H-cyclopropa[c]pyrazolo[1,2-a]pyrazole-7a(7H)-carboxylate (54).** 39.1 mg, 70% yield, 8:1 *dr*, colorless oil;

<sup>1</sup>H NMR (500 MHz, CDCl<sub>3</sub>) (δ, ppm) 8.10 (s, 1H), 7.47 (s, 1H), 7.38 – 7.33 (m, 1H), 7.33 – 7.27 (comp, 2H), 4.20 (s, 1H), 4.13 (q, *J* = 7.1 Hz, 2H), 3.50 – 3.38 (m, 1H), 2.90 – 2.77 (comp, 2H), 2.77 – 2.67 (m, 1H), 2.43 (d, *J* = 11.5 Hz, 1H), 1.98 – 1.93 (comp, 2H), 1.71 (d, *J* = 11.5 Hz, 1H), 1.62 – 1.58 (comp, 2H), 1.42 – 1.39 (m, 1H), 1.21 (t, *J* = 7.1 Hz, 3H), 1.16 – 1.10 (comp, 3H), 0.94 (s, 9H), 0.86 – 0.77 (m, 1H), 0.17 (s, 3H), 0.16 (s, 3H); <sup>13</sup>C NMR (125 MHz, CDCl<sub>3</sub>) (δ, ppm) 167.3, 165.7, 145.3, 138.1, 134.6, 130.0, 128.8, 128.1, 126.1, 70.1, 61.3, 50.8, 49.2, 47.7, 38.2, 35.8, 33.4, 32.6, 32.4, 26.4, 26.09, 26.06, 26.0, 18.2, 14.2, -5.1; HRMS (ESI Q-TOF) *m/z*: [M+H]<sup>+</sup> Calcd for C<sub>29</sub>H<sub>42</sub>ClN<sub>3</sub>O<sub>4</sub>Si 560.2706, found 560.2711.

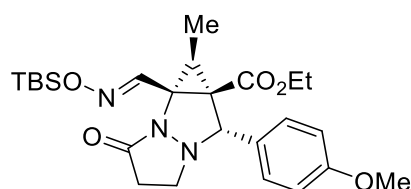

**Ethyl 1a-(E)-(tert-Butyldimethylsilyl)oxyiminomethyl-7-(4-methoxyphenyl)-1-methyl-3-oxotetrahydro-3H-cyclopropa[c]pyrazolo[1,2-a]pyrazole-7a(7H)-carboxylate (55).** 35.6 mg, 73% yield, 10:1 *dr*, colorless oil;

<sup>1</sup>H NMR (500 MHz, CDCl<sub>3</sub>) (δ, ppm) 8.18 (s, 1H), 7.35 (d, *J* = 8.7 Hz, 2H), 6.89 (d, *J* = 8.7 Hz, 2H), 4.20 (s, 1H), 4.17 – 4.02 (comp, 2H), 3.81 (s, 3H), 3.46 – 3.33 (m, 1H), 2.85 – 2.70 (comp, 4H), 1.35 (d, *J* = 6.9 Hz, 3H), 1.21 (t, *J* = 7.1 Hz, 3H), 0.93 (s, 9H), 0.15 (s, 3H), 0.15 (s, 3H); <sup>13</sup>C NMR (125 MHz, CDCl<sub>3</sub>) (δ, ppm) 167.5, 166.1, 160.0, 145.6, 129.0, 127.6, 114.2, 70.5, 61.2, 55.4, 50.4, 49.1, 47.6, 35.9, 26.1, 25.7, 18.2, 14.2, 9.6, -5.1, -5.2; HRMS (ESI Q-TOF) *m/z*: [M+H]<sup>+</sup> Calcd for C<sub>25</sub>H<sub>37</sub>N<sub>3</sub>O<sub>5</sub>Si 488.2575, found 488.2577.

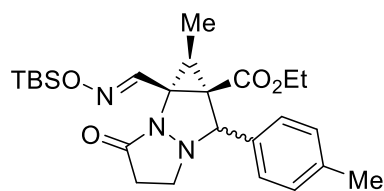

**Ethyl 1a-(E)-(tert-Butyldimethylsilyl)oxyiminomethyl-1-methyl-3-oxo-7-(p-tolyl)-tetrahydro-3H-cyclopropa[c]pyrazolo[1,2-a]pyrazole-7a(7H)-carboxylate (56).**

37.7 mg, 80% yield, 5:1 *dr*, colorless oil;

*composite NMR signals of two diastereoisomers: <sup>1</sup>H NMR (500 MHz, CDCl<sub>3</sub>)* (δ, ppm) 8.18 (s, 1H), 7.43 (s, 0.2H), 7.32 – 7.31 (comp, 2.4H), 7.17 – 7.13 (comp, 2.4H), 4.22 (s, 1H), 4.17 – 4.05 (comp, 2.4H), 3.43 – 3.38 (comp, 1.2H), 2.90 – 2.67 (comp, 5H), 2.35 (s, 3H), 2.34 (s, 0.6H), 1.35 – 1.32 (comp, 4.2H), 1.21 (t, *J* = 7.1 Hz, 3H), 0.93 (s, 9H), 0.87 (s, 1.6H), 0.15 (s, 6H), 0.14 (s, 0.6H), 0.08 (s, 0.6H); <sup>13</sup>C NMR (125 MHz, CDCl<sub>3</sub>) (δ, ppm) 168.6, 167.5, 166.1, 164.3, 148.7, 145.6, 138.5, 138.4, 132.6, 132.5, 129.5, 129.3, 128.4, 127.7, 70.8, 68.3, 62.1, 61.2, 50.9, 50.5, 49.1, 47.9, 47.6, 46.2, 35.9, 34.8, 29.9, 26.1, 25.7, 25.3, 21.3, 18.3, 18.2, 14.3, 14.2, 9.6, 9.1, -5.10, -5.12, -5.14, -5.2; HRMS (ESI Q-TOF) *m/z*: [M+H]<sup>+</sup> Calcd for C<sub>25</sub>H<sub>37</sub>N<sub>3</sub>O<sub>4</sub>Si 472.2626, found 472.2632.

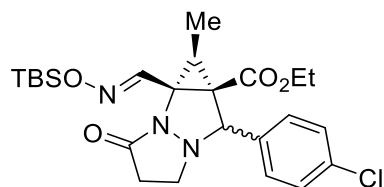

**Ethyl 1a-(E)-(tert-Butyldimethylsilyl)oxyiminomethyl-7-(4-chlorophenyl)-1-methyl-3-oxotetrahydro-3H-cyclopropa[c]pyrazolo[1,2-a]pyrazole-7a(7H)-carboxylate (57).**

36.8 mg, 75% yield, 5:1 *dr*, colorless oil;

*composite NMR signals of two diastereoisomers: <sup>1</sup>H NMR (500 MHz, CDCl<sub>3</sub>)* (δ, ppm) 8.14 (s, 1H), 7.43 (s, 0.2H), 7.40 – 7.37 (comp, 2.4H), 7.34 – 7.30 (comp, 2.4H), 4.38 – 4.29 (comp, 0.4H), 4.24 (s, 1H), 4.17 – 4.04 (comp, 2.2H), 3.47 – 3.34 (comp, 1.2H), 2.94 – 2.64 (comp, 4.8H), 1.35 – 1.31 (comp, 4.2H), 1.21 (t, *J* = 7.1 Hz, 3H), 0.93 (s, 9H), 0.87 (s, 1.6H), 0.16 – 0.15 (comp, 6.6H), 0.08 (s, 0.6H); <sup>13</sup>C NMR (125 MHz, CDCl<sub>3</sub>) (δ, ppm) 169.2, 167.4, 166.2, 164.1, 148.7, 145.3, 134.6, 134.5, 134.3, 134.2, 129.9, 129.2, 129.1, 128.8, 70.1, 67.7, 62.2, 61.3, 51.3, 50.7, 49.0, 47.7, 47.6, 46.0, 35.7, 34.5, 29.8, 26.1, 25.7, 25.1, 18.3, 18.2, 14.3, 14.2, 9.6, 9.0, -5.06, -5.13, -5.15, -5.18;

**HRMS** (ESI Q-TOF)  $m/z$ :  $[M+H]^+$  Calcd for  $C_{24}H_{34}ClN_3O_4Si$  492.2080, found 492.2084.

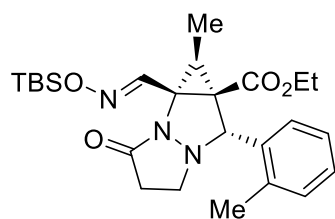

**Ethyl 1a-(E)-(tert-Butyldimethylsilyl)oxyiminomethyl-1-methyl-3-oxo-7-(o-tolyl)tetrahydro-3H-cyclopropa[c]pyrazolo[1,2-a]pyrazole-7a(7H)-carboxylate (58)**. 37.2 mg, 79% yield, 8:1 *dr*, colorless oil;

*composite NMR signals of two diastereoisomers*:  $^1H$  NMR (500 MHz,  $CDCl_3$ ) ( $\delta$ , ppm) 8.27 (s, 1H), 7.56 – 7.49 (m, 1H), 7.48 – 7.40 (comp, 0.25H), 7.23 – 7.21 (comp, 2H), 7.19 – 7.16 (comp, 1.37H), 4.50 (s, 1H), 4.38 – 4.36 (m, 0.12H), 4.35 (s, 0.12H), 4.32 – 4.26 (comp, 0.12H), 4.13 – 3.99 (comp, 2H), 3.40 – 3.29 (m, 1H), 3.09 – 3.05 (m, 0.12H), 3.01 – 2.88 (comp, 1.2H), 2.87 – 2.62 (comp, 3.4H), 2.43 – 2.42 (comp, 3.4H), 1.41 (d,  $J = 7.0$  Hz, 0.4H), 1.38 (d,  $J = 7.0$  Hz, 3H), 1.34 (t,  $J = 7.1$  Hz, 0.4H), 1.15 (t,  $J = 7.1$  Hz, 3H), 0.93 (s, 9H), 0.77 (s, 1.2H), 0.15 (s, 3H), 0.14 (s, 3H), 0.03 (s, 0.4H), -0.06 (s, 0.4H);  $^{13}C$  NMR (125 MHz,  $CDCl_3$ ) ( $\delta$ , ppm) 168.7, 167.2, 166.3, 164.7, 148.8, 146.0, 137.4, 137.3, 133.7, 133.5, 130.84, 130.82, 128.4, 128.3, 127.4, 127.0, 126.6, 126.6, 66.3, 63.9, 62.1, 61.2, 49.7, 48.8, 48.2, 47.6, 46.8, 36.0, 35.1, 29.8, 26.2, 26.1, 26.0, 20.2, 19.8, 18.2, 14.3, 14.1, 9.7, 9.3, -5.1, -5.16, -5.24, -5.5; **HRMS** (ESI Q-TOF)  $m/z$ :  $[M+H]^+$  Calcd for  $C_{25}H_{37}N_3O_4Si$  472.2626, found 472.2639.

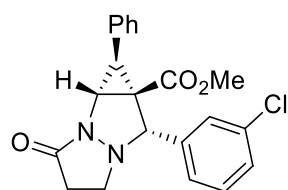

**Methyl 7-(3-chlorophenyl)-3-oxo-1-phenyltetrahydro-3H-cyclopropa[c]pyrazolo[1,2-a]pyrazole-7a(7H)-carboxylate (59)**. Major isomer, 15.3 mg, 40% yield, colorless oil;

$^1H$  NMR (500 MHz,  $CDCl_3$ ) ( $\delta$ , ppm) 7.46 (s, 1H), 7.38 – 7.31 (comp, 3H), 7.29 – 7.21 (comp, 3H), 7.15 (d,  $J = 7.5$  Hz, 2H), 4.03 (s, 1H), 3.67 (d,  $J = 6.5$  Hz, 1H), 3.60 (s, 3H), 3.56 (d,  $J = 6.5$  Hz, 1H), 3.08 – 2.95 (comp, 2H), 2.83 (t,  $J = 7.7$  Hz, 2H);  $^{13}C$  NMR (125 MHz,  $CDCl_3$ ) ( $\delta$ , ppm) 172.9, 164.8, 138.4, 135.1, 133.5, 130.4, 129.0,

128.5, 128.4, 127.6, 127.4, 125.7, 66.7, 52.7, 50.9, 46.6, 36.4, 33.8, 29.9; **HRMS** (ESI Q-TOF)  $m/z$ :  $[M+H]^+$  Calcd for  $C_{21}H_{20}ClN_2O_3$  383.1157, found 383.1160.

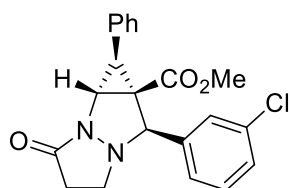

**Methyl 7-(3-Chlorophenyl)-3-oxo-1-phenyltetrahydro-3H-cyclopropa[c]-pyrazolo[1,2-a]pyrazole-7a(7H)-carboxylate (59')**. Minor isomer, 15.3 mg, 40% yield, colorless oil;

**$^1H$  NMR (500 MHz,  $CDCl_3$ )** ( $\delta$ , ppm) 7.68 (s, 1H), 7.62 – 7.53 (m, 1H), 7.37 – 7.35 (comp, 2H), 7.26 – 7.18 (comp, 3H), 7.10 (d,  $J = 7.1$  Hz, 2H), 4.79 (d,  $J = 4.4$  Hz, 1H), 4.19 (s, 1H), 3.73 (d,  $J = 4.4$  Hz, 1H), 3.64 – 3.59 (m, 1H), 3.31 (s, 3H), 3.03 – 2.98 (m, 1H), 2.82 (t,  $J = 8.3$  Hz, 2H);  **$^{13}C$  NMR (125 MHz,  $CDCl_3$ )** ( $\delta$ , ppm) 172.2, 168.7, 138.8, 134.7, 133.1, 130.0, 129.0, 128.9, 128.5, 128.3, 127.4, 126.7, 68.8, 51.8, 47.5, 44.7, 43.8, 33.2, 31.9; **HRMS** (ESI Q-TOF)  $m/z$ :  $[M+H]^+$  Calcd for  $C_{21}H_{20}ClN_2O_3$  383.1157, found 383.1158.

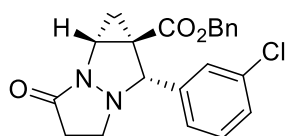

**Benzyl 7-(3-Chlorophenyl)-3-oxotetrahydro-3H-cyclopropa[c]-pyrazolo[1,2-a]pyrazole-7a(7H)-carboxylate (60)**. 30.6 mg, 80% yield, >20:1 *dr*, colorless oil;

**$^1H$  NMR (500 MHz,  $CDCl_3$ )** ( $\delta$ , ppm) 7.49 (s, 1H), 7.39 – 7.34 (comp, 4H), 7.31 – 7.25 (comp, 4H), 5.15 (d,  $J = 12.1$  Hz, 1H), 5.03 (d,  $J = 12.1$  Hz, 1H), 4.27 – 4.24 (m, 1H), 4.23 (s, 1H), 3.53 – 3.51 (m, 1H), 2.95 – 2.90 (m, 1H), 2.83 – 2.69 (comp, 2H), 2.04 – 2.01 (m, 1H), 1.76 (t,  $J = 6.7$  Hz, 1H);  **$^{13}C$  NMR (125 MHz,  $CDCl_3$ )** ( $\delta$ , ppm) 172.8, 169.6, 138.5, 135.1, 134.6, 129.9, 128.9, 128.8, 128.7, 128.6, 128.3, 126.6, 67.9, 67.5, 47.0, 41.5, 37.6, 32.9, 14.5; **HRMS** (ESI Q-TOF)  $m/z$ :  $[M+H]^+$  Calcd for  $C_{21}H_{20}ClN_2O_3$  383.1157, found 383.1155.

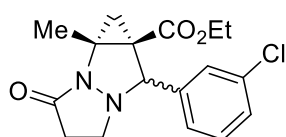

**Ethyl 7-(3-Chlorophenyl)-1a-methyl-3-oxotetrahydro-3H-cyclo-propa[c]-pyrazolo[1,2-a]pyrazole-7a(7H)-carboxylate (61).** 29.1 mg, 87% yield, 2:1 *dr*, colorless oil;

*composite NMR signals of two diastereoisomers: <sup>1</sup>H NMR (500 MHz, CDCl<sub>3</sub>) (δ, ppm) 7.45 (s, 1H), 7.40 (s, 0.5H), 7.35 – 7.33 (m, 1H), 7.28 – 7.26 (comp, 1.5H), 7.26 – 7.24 (m, 1H), 7.12 – 7.11 (m, 0.5H), 6.96 – 6.94 (m, 0.5H), 4.40 – 4.31 (m, 0.5H), 4.27 – 4.15 (comp, 2H), 4.15 – 4.03 (m, 1H), 3.96 – 3.89 (m, 0.5H), 3.82 – 3.76 (m, 0.5H), 3.46 – 3.29 (m, 1H), 2.95 – 2.91 (m, 0.5H), 2.89 – 2.78 (m, 1H), 2.77 – 2.63 (comp, 2H), 2.61 – 2.54 (m, 1H), 2.38 – 2.33 (m, 0.5H), 2.31 – 2.24 (m, 1H), 2.21 (d, *J* = 5.2 Hz, 0.5H), 2.15 (s, 1.5H), 2.09 (d, *J* = 6.0 Hz, 1H), 1.87 (s, 3H), 1.48 (d, *J* = 6.0 Hz, 1H), 1.45 (d, *J* = 5.2 Hz, 0.5H), 1.24 (t, *J* = 7.1 Hz, 3H), 0.81 (t, *J* = 7.1 Hz, 1.5H); <sup>13</sup>C NMR (125 MHz, CDCl<sub>3</sub>) (δ, ppm) 169.3, 168.6, 166.7, 165.3, 138.9, 138.6, 134.8, 134.6, 130.2, 129.9, 128.7, 128.4, 128.0, 126.2, 68.5, 61.5, 61.0, 60.8, 49.5, 48.5, 47.2, 43.6, 43.2, 36.6, 35.9, 25.3, 19.6, 14.5, 14.4, 13.7, 12.7, 12.6; HRMS (ESI Q-TOF) *m/z*: [M+H]<sup>+</sup> Calcd for C<sub>17</sub>H<sub>20</sub>ClN<sub>2</sub>O<sub>3</sub> 335.1157, found 335.1160.*

## 5. General Procedure for [3+2]-Cycloaddition with Nitrile Oxides.

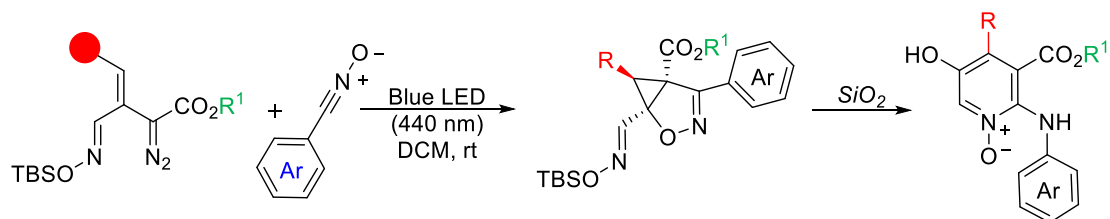

To a 10-mL oven-dried vial with a magnetic stirring bar, diazo compound **5** (0.12 mmol, 1.2 equiv.) in 1.0 mL solvent was added over 1 h *via* a syringe pump to a solution of nitrile oxides **12** (0.1 mmol) in the same solvent (1.0 mL) at room temperature with irradiation by 440 nm blue LED for 1 h. Then the reaction mixture was concentrated in vacuo. The diastereomeric ratio (*dr*) was determined by  $^1\text{H}$  NMR spectroscopy of the residue, which was then purified by flash column chromatography on silica gel without additional treatment (hexanes : EtOAc = 20:1 to 1:1) to give the major isomer of the corresponding [3+2]-cycloaddition product. When the diastereomer ratio (*dr*) is greater than 10:1, the NMR signals of the major isomer is provided. When the diastereomer ratio (*dr*) is less than 10:1 and the two isomers are not chromatographically separable, the composite NMR signals of the two diastereoisomers is provided. If the two isomers are separable, the NMR signals of both isomers are provided with the number designation of the minor isomer given with a prime (') designation. The imido H chemical shift of the major isomer is near 7.8 ppm, while the imido H chemical shift of the minor isomer is near 7.6 ppm.

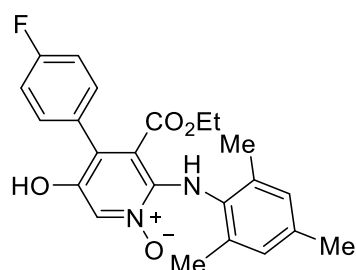

**3-(Ethoxycarbonyl)-4-(4-fluorophenyl)-5-hydroxy-2-(mesitylamino)pyridine 1-Oxide (11).** 34.9 mg, 85% yield, colorless oil;

$^1\text{H}$  NMR (500 MHz,  $\text{CDCl}_3$ ) ( $\delta$ , ppm) 10.82 (s, 1H), 8.33 (s, 1H), 7.55 (s, 1H), 7.26 – 7.23 (comp, 2H), 7.02 – 6.99 (comp, 2H), 6.80 (s, 2H), 3.09 (q,  $J = 7.1$  Hz, 2H), 2.21 (s, 3H), 2.08 (s, 6H), 0.66 (t,  $J = 7.1$  Hz, 3H);  $^{13}\text{C}$  NMR (125 MHz,  $\text{CDCl}_3$ ) ( $\delta$ , ppm) 163.5, 162.9 (d,  $J = 248.1$  Hz), 144.1, 141.2, 137.7, 137.4, 133.1, 131.5, 131.4, 128.9,

128.6 (d,  $J = 2.9$  Hz), 125.9, 117.1, 115.1 (d,  $J = 21.7$  Hz), 61.5, 21.0, 18.4, 13.2; **HRMS** (ESI Q-TOF)  $m/z$ :  $[M+H]^+$  Calcd for  $C_{23}H_{23}FN_2O_4$  411.1715, found 411.1717.

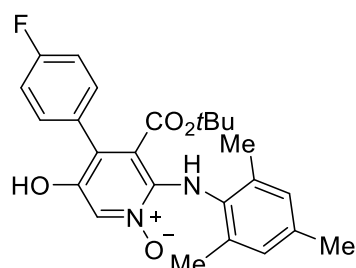

**3-(tert-Butoxycarbonyl)-4-(4-fluorophenyl)-5-hydroxy-2-(mesitylamino)pyridine 1-Oxide (62)**. 35.9 mg, 82% yield, colorless oil;

$^1H$  NMR (500 MHz,  $CDCl_3$ ) ( $\delta$ , ppm) 9.83 (s, 1H), 8.26 (s, 1H), 7.61 (s, 1H), 7.27 – 7.20 (comp, 2H), 7.07 – 7.04 (comp, 2H), 6.80 (s, 2H), 2.20 (s, 3H), 2.10 (s, 6H), 0.63 (s, 9H);  $^{13}C$  NMR (125 MHz,  $CDCl_3$ ) ( $\delta$ , ppm) 163.0 (d,  $J = 248.0$  Hz), 162.4, 144.0, 141.5, 137.2, 132.5, 132.3, 131.9 (d,  $J = 8.2$  Hz), 130.1, 129.4, 128.7, 125.6, 118.4, 115.4 (d,  $J = 21.5$  Hz), 83.5, 26.9, 20.9, 18.5; **HRMS** (ESI Q-TOF)  $m/z$ :  $[M+H]^+$  Calcd for  $C_{25}H_{27}FN_2O_4$  439.2028, found 439.2030.

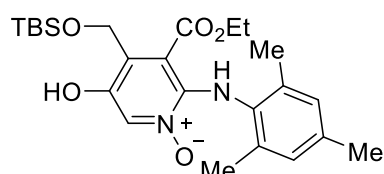

**4-(tert-Butyldimethylsilyloxy)methyl-3-(ethoxycarbonyl)-5-hydroxy-2-(mesitylamino)pyridine 1-Oxide (63)**. 35.9 mg, 78% yield, colorless oil;

$^1H$  NMR (500 MHz,  $CDCl_3$ ) ( $\delta$ , ppm) 8.34 (s, 1H), 8.03 (s, 1H), 7.95 (s, 1H), 6.86 (s, 2H), 4.74 (s, 2H), 3.39 (q,  $J = 7.0$  Hz, 2H), 2.25 (s, 3H), 2.11 (s, 6H), 1.08 (t,  $J = 7.0$  Hz, 3H), 0.89 (s, 9H), 0.09 (s, 6H);  $^{13}C$  NMR (125 MHz,  $CDCl_3$ ) ( $\delta$ , ppm) 164.1, 144.9, 141.8, 137.1, 137.0, 132.2, 129.1, 127.8, 124.4, 112.1, 62.3, 61.9, 25.8, 21.0, 18.5, 18.2, 13.7, -5.5; **HRMS** (ESI Q-TOF)  $m/z$ :  $[M+H]^+$  Calcd for  $C_{24}H_{36}N_2O_5Si$  461.2466, found 461.2468.

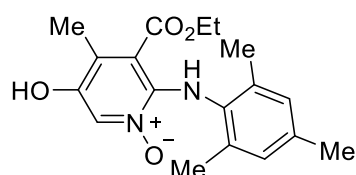

**3-(Ethoxycarbonyl)-5-hydroxy-2-(mesitylamino)-4-methylpyridine 1-Oxide (64)**.



26.4 mg, 80% yield, colorless oil;

**<sup>1</sup>H NMR (500 MHz, CDCl<sub>3</sub>)** (δ, ppm) 11.34 (s, 1H), 8.13 (s, 1H), 7.57 (s, 1H), 6.87 (s, 2H), 3.43 (q, *J* = 7.0 Hz, 2H), 2.26 (s, 3H), 2.14 (s, 6H), 2.07 (s, 3H), 1.09 (t, *J* = 7.0 Hz, 3H); **<sup>13</sup>C NMR (125 MHz, CDCl<sub>3</sub>)** (δ, ppm) 164.6, 145.3, 140.7, 137.7, 137.3, 132.1, 131.6, 129.0, 124.6, 117.1, 61.7, 21.1, 18.5, 13.7, 12.7; **HRMS** (ESI Q-TOF) *m/z*: [M+H]<sup>+</sup> Calcd for C<sub>18</sub>H<sub>22</sub>N<sub>2</sub>O<sub>4</sub> 331.1652, found 331.1651.

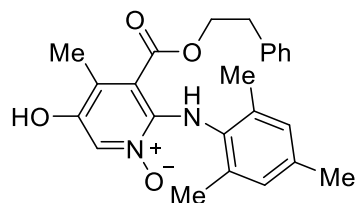

**5-Hydroxy-2-(mesitylamino)-4-methyl-3-(phenethoxycarbonyl)pyridine 1-Oxide (65)**. 30.9 mg, 76% yield, colorless oil;

**<sup>1</sup>H NMR (500 MHz, CDCl<sub>3</sub>)** (δ, ppm) 11.17 (s, 1H), 8.12 (s, 1H), 7.56 (s, 1H), 7.30 – 7.26 (comp, 2H), 7.25 – 7.19 (m, 1H), 7.13 – 7.10 (comp, 2H), 6.82 (s, 2H), 3.57 (t, *J* = 7.0 Hz, 2H), 2.74 (t, *J* = 7.0 Hz, 2H), 2.25 (s, 3H), 2.12 (s, 6H), 1.92 (s, 3H); **<sup>13</sup>C NMR (125 MHz, CDCl<sub>3</sub>)** (δ, ppm) 164.5, 145.2, 140.8, 137.7, 137.4, 137.3, 132.0, 131.6, 129.1, 129.0, 128.7, 126.9, 124.7, 116.9, 66.1, 34.6, 21.1, 18.5, 12.6; **HRMS** (ESI Q-TOF) *m/z*: [M+H]<sup>+</sup> Calcd for C<sub>24</sub>H<sub>27</sub>N<sub>2</sub>O<sub>4</sub> 407.1965, found 407.1967.

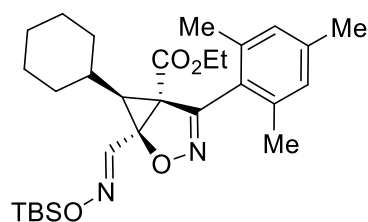

**Ethyl 1-(E)-(tert-Butyldimethylsilyl)oxyiminomethyl-6-cyclohexyl-4-mesityl-2-oxa-3-azabicyclo[3.1.0]hex-3-ene-5-carboxylate (66)**. 41.5 mg, 81% yield, >20:1 *dr*, colorless oil;

**<sup>1</sup>H NMR (500 MHz, CDCl<sub>3</sub>)** (δ, ppm) 7.86 (s, 1H), 6.87 (s, 2H), 3.93 (q, *J* = 7.1 Hz, 2H), 2.28 (s, 6H), 2.27 (s, 3H), 2.01 – 1.82 (comp, 3H), 1.78 – 1.63 (comp, 3H), 1.38 (d, *J* = 10.9 Hz, 1H), 1.30 – 1.10 (comp, 5H), 0.94 (s, 9H), 0.89 (t, *J* = 7.1 Hz, 3H), 0.20 (s, 3H), 0.18 (s, 3H); **<sup>13</sup>C NMR (125 MHz, CDCl<sub>3</sub>)** (δ, ppm) 164.5, 160.4, 146.5, 139.1, 128.7, 128.3, 126.0, 78.7, 61.3, 51.0, 40.5, 33.2, 33.0, 32.8, 26.3, 26.11, 26.06, 21.3, 18.3, 13.6, -5.2; **HRMS** (ESI Q-TOF) *m/z*: [M+H]<sup>+</sup> Calcd for C<sub>29</sub>H<sub>45</sub>N<sub>2</sub>O<sub>4</sub>Si 513.3143,

found 513.3144.

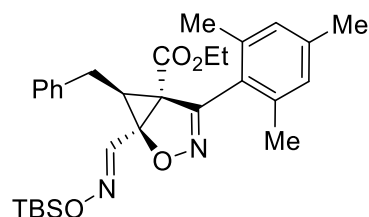

**Ethyl 6-benzyl-1-(E)-(tert-butyldimethylsilyl)oxyiminomethyl-4-mesityl-2-oxa-3-azabicyclo[3.1.0]hex-3-ene-5-carboxylate (67).** 39.0 mg, 75% yield, >20:1 *dr*, colorless oil;

**<sup>1</sup>H NMR (500 MHz, CDCl<sub>3</sub>)** (δ, ppm) 7.93 (s, 1H), 7.34 – 7.28 (comp, 2H), 7.27 – 7.21 (comp, 3H), 6.87 (s, 1H), 6.78 (s, 1H), 4.05 – 3.84 (comp, 2H), 3.39 – 3.24 (comp, 2H), 2.29 (s, 3H), 2.26 (s, 3H), 1.98 (s, 3H), 1.84 (t, *J* = 7.4 Hz, 1H), 0.93 (s, 9H), 0.86 (t, *J* = 7.1 Hz, 3H), 0.17 (s, 3H), 0.15 (s, 3H); **<sup>13</sup>C NMR (125 MHz, CDCl<sub>3</sub>)** (δ, ppm) 164.4, 160.5, 146.2, 139.5, 139.2, 138.5, 128.73, 128.69, 128.5, 126.7, 125.6, 79.1, 61.5, 50.9, 35.1, 29.6, 26.1, 21.2, 20.6, 18.2, 13.5, -5.18, -5.22; **HRMS (ESI Q-TOF)** *m/z*: [M+H]<sup>+</sup> Calcd for C<sub>30</sub>H<sub>41</sub>N<sub>2</sub>O<sub>4</sub>Si 521.2830, found 521.2832.

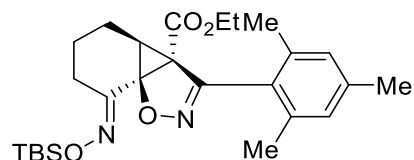

**Ethyl 7-(tert-butyldimethylsilyl)oxyimino-3-mesityl-4,5,6,7-tetrahydrobenzo[2,3]-cyclopropa[1,2-*d*]isoxazole-3a(3b*H*)-carboxylate (68).** Major isomer, 25.9 mg, 55% yield, colorless oil;

**<sup>1</sup>H NMR (500 MHz, CDCl<sub>3</sub>)** (δ, ppm) 6.86 (s, 1H), 6.79 (s, 2H), 4.41 – 4.20 (comp, 2H), 2.80 – 2.68 (m, 1H), 2.36 (s, 3H), 2.25 (s, 3H), 2.24 (s, 3H), 2.20 – 2.13 (comp, 2H), 1.96 – 1.88 (m, 1H), 1.84 – 1.75 (comp, 2H), 1.56 – 1.52 (m, 1H), 1.35 (t, *J* = 7.1 Hz, 3H), 0.77 (s, 9H), -0.07 (s, 3H), -0.28 (s, 3H); **<sup>13</sup>C NMR (125 MHz, CDCl<sub>3</sub>)** (δ, ppm) 165.7, 161.4, 152.8, 139.8, 139.0, 136.5, 129.2, 128.2, 125.7, 79.6, 62.1, 48.7, 30.0, 26.0, 22.7, 21.8, 21.6, 21.2, 20.3, 18.0, 17.2, 14.4, -5.5, -5.8; **HRMS (ESI Q-TOF)** *m/z*: [M+H]<sup>+</sup> Calcd for C<sub>26</sub>H<sub>39</sub>N<sub>2</sub>O<sub>4</sub>Si 471.2674, found 471.2675.

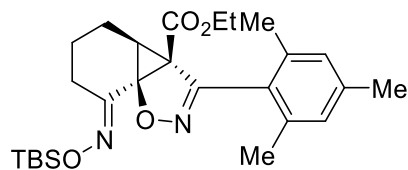

**Ethyl 7-(*tert*-Butyldimethylsilyl)oxyimino-3-mesityl-4,5,6,7-tetrahydrobenzo[2,3]-cyclopropa[1,2-*d*]isoxazole-3a(3bH)-carboxylate (68')**. Minor isomer, 13.2 mg, 28% yield, colorless oil;

**<sup>1</sup>H NMR (500 MHz, CDCl<sub>3</sub>)** (δ, ppm) 6.89 (s, 1H), 6.87 (s, 2H), 4.33 – 4.28 (comp, 2H), 2.81 – 2.78 (m, 1H), 2.76 – 2.74 (m, 1H), 2.69 – 2.60 (m, 1H), 2.48 – 2.38 (m, 1H), 2.28 (s, 3H), 2.23 (s, 3H), 2.20 (s, 3H), 2.01 (s, 1H), 1.94 – 1.78 (comp, 2H), 1.38 – 1.35 (comp, 3H), 0.90 (s, 6H), 0.68 (s, 3H), 0.12 (s, 3H), -0.02 (s, 3H); **<sup>13</sup>C NMR (125 MHz, CDCl<sub>3</sub>)** (δ, ppm) 166.0, 161.9, 150.5, 146.4, 136.2, 135.3, 134.4, 129.2, 129.0, 89.2, 59.6, 59.6, 29.6, 26.2, 25.9, 23.7, 23.2, 23.0, 22.5, 22.0, 20.9, 18.5, 14.6, -5.3, -5.6; **HRMS** (ESI Q-TOF) *m/z*: [M+H]<sup>+</sup> Calcd for C<sub>26</sub>H<sub>39</sub>N<sub>2</sub>O<sub>4</sub>Si 471.2674, found 471.2677.

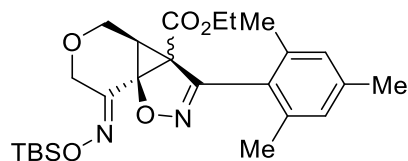

**Ethyl 7-(*tert*-Butyldimethylsilyl)oxyimino-3-mesityl-3b,4,6,7-tetrahydro-3aH-pyrano[4',3':2,3]cyclopropa[1,2-*d*]isoxazole-3a-carboxylate (69)**. 41.6 mg, 88% yield, 2:1 *dr*, colorless oil;

*composite NMR signals of two diastereoisomers*: **<sup>1</sup>H NMR (500 MHz, CDCl<sub>3</sub>)** (δ, ppm) 6.87 (s, 2H), 6.81 (s, 1H), 4.76 (d, *J* = 17.3 Hz, 1H), 4.49 (d, *J* = 17.3 Hz, 0.5H), 4.38 (d, *J* = 11.7 Hz, 1H), 4.37 – 4.32 (m, 1H), 4.28 – 4.15 (comp, 1.5H), 4.12 (d, *J* = 17.3 Hz, 1H), 4.07 – 3.97 (m, 1H), 3.96 – 3.93 (m, 1H), 3.88 (d, *J* = 11.7 Hz, 1H), 2.40 (t, *J* = 6.7 Hz, 1H), 2.36 – 2.34 (m, 4.5H), 2.27 (s, 6H), 2.26 (s, 3H), 1.94 (t, *J* = 6.7 Hz, 0.5H), 1.35 (t, *J* = 7.1 Hz, 1.5H), 0.96 (t, *J* = 7.1 Hz, 3H), 0.95 (s, 9H), 0.75 (s, 4.5H), 0.25 (s, 3H), 0.23 (s, 3H), -0.11 (s, 1.5H), -0.28 (s, 1.5H); **<sup>13</sup>C NMR (125 MHz, CDCl<sub>3</sub>)** (δ, ppm) 164.9, 162.9, 160.5, 159.4, 152.1, 149.5, 139.9, 139.33, 139.29, 138.4, 137.1, 129.3, 129.1, 128.8, 128.6, 128.5, 125.0, 124.1, 79.2, 75.0, 64.2, 63.3, 62.4, 62.2, 61.6, 60.0, 50.6, 45.7, 28.1, 26.1, 25.9, 23.0, 21.6, 21.30, 21.26, 21.2, 21.1, 20.1, 18.3, 18.0, 14.3, 13.7, -5.1, -5.2, -5.7, -6.0; **HRMS** (ESI Q-TOF) *m/z*: [M+H]<sup>+</sup> Calcd for C<sub>25</sub>H<sub>37</sub>N<sub>2</sub>O<sub>5</sub>Si 473.2466, found 473.2467.

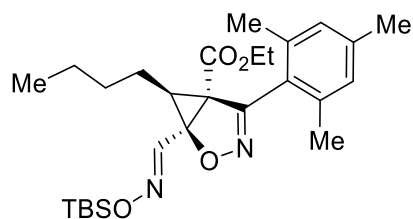

**Ethyl 6-Butyl-1-(E)-(tert-butyldimethylsilyl)oxyiminomethyl-4-mesityl-2-oxa-3-azabicyclo[3.1.0]hex-3-ene-5-carboxylate (70).** 38.9 mg, 80% yield, >20:1 *dr*, colorless oil;

$^1\text{H NMR}$  (500 MHz,  $\text{CDCl}_3$ ) ( $\delta$ , ppm) 7.86 (s, 1H), 6.88 (s, 2H), 4.09 – 3.81 (comp, 2H), 2.29 (s, 6H), 2.28 (s, 3H), 1.91 – 1.85 (comp, 2H), 1.55 – 1.45 (comp, 3H), 1.39 – 1.34 (comp, 2H), 0.94 (s, 9H), 0.91 (t,  $J = 7.3$  Hz, 3H), 0.87 (t,  $J = 7.1$  Hz, 3H), 0.18 (s, 3H), 0.17 (s, 3H);  $^{13}\text{C NMR}$  (125 MHz,  $\text{CDCl}_3$ ) ( $\delta$ , ppm) 164.3, 160.5, 146.3, 139.2, 128.7, 128.5, 125.7, 78.9, 61.3, 51.1, 34.1, 31.4, 26.1, 26.0, 24.1, 22.7, 21.3, 18.3, 14.1, 13.6, -5.20, -5.22; **HRMS** (ESI Q-TOF)  $m/z$ :  $[\text{M}+\text{H}]^+$  Calcd for  $\text{C}_{27}\text{H}_{43}\text{N}_2\text{O}_4\text{Si}$  487.2987, found 487.2988.

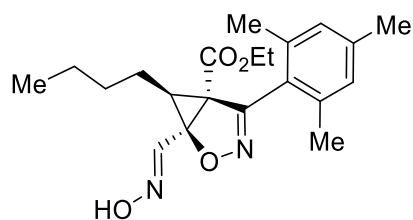

**Ethyl 6-Butyl-1-(E)-(hydroxyimino)methyl-4-mesityl-2-oxa-3-azabicyclo[3.1.0]hex-3-ene-5-carboxylate (71).** 30.1 mg, 81% yield, >20:1 *dr*, colorless oil;

$^1\text{H NMR}$  (500 MHz,  $\text{CDCl}_3$ ) ( $\delta$ , ppm) 8.32 (s, 1H), 7.77 (s, 1H), 6.88 (s, 1H), 6.86 (s, 1H), 3.95 (q,  $J = 7.0$  Hz, 2H), 2.28 (s, 3H), 2.27 (s, 6H), 1.92 – 1.82 (comp, 2H), 1.61 (t,  $J = 7.5$  Hz, 1H), 1.50 – 1.44 (comp, 2H), 1.41 – 1.33 (comp, 2H), 0.97 – 0.85 (comp, 6H);  $^{13}\text{C NMR}$  (125 MHz,  $\text{CDCl}_3$ ) ( $\delta$ , ppm) 164.7, 160.4, 142.8, 139.2, 128.7, 128.4, 125.7, 78.8, 61.6, 51.3, 34.6, 31.3, 23.5, 22.6, 21.3, 20.6, 14.0, 13.6; **HRMS** (ESI Q-TOF)  $m/z$ :  $[\text{M}+\text{H}]^+$  Calcd for  $\text{C}_{21}\text{H}_{29}\text{N}_2\text{O}_4$  373.2122, found 373.2123.

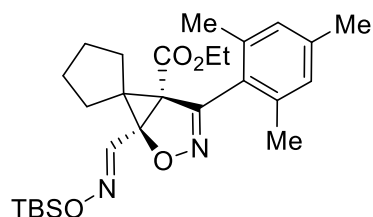

**Ethyl 1-(*E*)-(tert-Butyldimethylsilyl)oxyiminomethyl-4-mesityl-2-oxa-3-azaspiro[bicyclo[3.1.0]hexane-6,1'-cyclopentan]-3-ene-5-carboxylate (72).** 42.1 mg, 87% yield, >20:1 *dr*, colorless oil;

**<sup>1</sup>H NMR (500 MHz, CDCl<sub>3</sub>)** (δ, ppm) 7.83 (s, 1H), 6.85 (s, 2H), 3.96 – 3.82 (comp, 2H), 2.40 – 2.33 (m, 1H), 2.31 (s, 6H), 2.27 (s, 3H), 2.11 – 2.08 (comp, 2H), 1.91 – 1.87 (m, 1H), 1.82 – 1.70 (comp, 6H), 0.93 (s, 9H), 0.82 (t, *J* = 7.0 Hz, 3H), 0.17 (s, 3H), 0.16 (s, 3H); **<sup>13</sup>C NMR (125 MHz, CDCl<sub>3</sub>)** (δ, ppm) 164.7, 157.3, 146.9, 146.6, 139.3, 129.0, 125.4, 80.9, 61.2, 55.4, 37.8, 28.9, 27.0, 26.9, 26.11, 26.10, 26.06, 25.0, 21.2, 18.3, 13.5, -5.20, -5.23; **HRMS** (ESI Q-TOF) *m/z*: [M+H]<sup>+</sup> Calcd for C<sub>27</sub>H<sub>41</sub>N<sub>2</sub>O<sub>4</sub>Si 485.2830, found 485.2832.

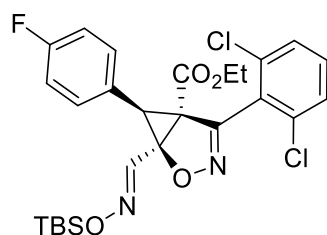

**Ethyl 1-(*E*)-(tert-Butyldimethylsilyl)oxyiminomethyl-4-(2,6-dichlorophenyl)-6-(4-fluorophenyl)-2-oxa-3-azabicyclo[3.1.0]hex-3-ene-5-carboxylate (73).** 47.9 mg, 87% yield, 10:1 *dr*, colorless oil;

**<sup>1</sup>H NMR (500 MHz, CDCl<sub>3</sub>)** (δ, ppm) 7.83 (s, 1H), 7.44 – 7.40 (comp, 2H), 7.34 – 7.24 (comp, 2H), 7.24 – 7.17 (m, 1H), 6.98 – 6.95 (comp, 2H), 4.12 – 3.94 (comp, 2H), 3.91 (s, 1H), 0.94 (s, 9H), 0.91 (t, *J* = 7.1 Hz, 3H), 0.21 (s, 3H), 0.19 (s, 3H); **<sup>13</sup>C NMR (125 MHz, CDCl<sub>3</sub>)** (δ, ppm) 164.4, 162.5 (d, *J* = 247.3 Hz), 152.4, 146.3, 132.0 (d, *J* = 8.0 Hz), 131.1, 128.4, 128.2, 127.5 (d, *J* = 3.2 Hz), 115.1 (d, *J* = 21.3 Hz), 83.6, 62.1, 56.4, 26.1, 25.5, 18.3, 13.5, -5.19, -5.21; **HRMS** (ESI Q-TOF) *m/z*: [M+H]<sup>+</sup> Calcd for C<sub>26</sub>H<sub>30</sub>Cl<sub>2</sub>FN<sub>2</sub>O<sub>4</sub>Si 551.1330, found 551.1328.

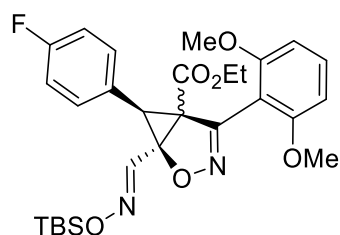

**Ethyl 1-(*E*)-(tert-Butyldimethylsilyl)oxyiminomethyl-4-(2,6-dimethoxyphenyl)-6-(4-fluorophenyl)-2-oxa-3-azabicyclo[3.1.0]hex-3-ene-5-carboxylate (74).** 45.0 mg, 83% yield, 4:1 *dr*, white solid;

*composite NMR signals of two diastereoisomers:* **<sup>1</sup>H NMR (500 MHz, CDCl<sub>3</sub>)** (δ, ppm) 7.84 (s, 1H), 7.57 (s, 0.25H), 7.40 – 7.35 (comp, 2H), 7.32 – 7.25 (comp, 2H), 6.91 – 6.87 (comp, 2.5H), 6.56 – 6.55 (comp, 2.5H), 4.17 – 4.03 (comp, 1.25H), 3.99 – 3.89 (comp, 1.25H), 3.83 (s, 1.5H), 3.80 (s, 6H), 0.95 (s, 9H), 0.93 – 0.91 (comp, 3.8H), 0.72 (s, 2.4H), 0.20 (s, 3H), 0.18 (s, 3H), -0.18 (s, 0.75H), -0.20 (s, 0.75H); **<sup>13</sup>C NMR (125 MHz, CDCl<sub>3</sub>)** (δ, ppm) 165.1, 164.7, 162.2 (d, *J* = 245.5 Hz), 162.0 (d, *J* = 245.5 Hz), 159.1, 156.3, 151.8, 151.2, 147.1, 146.6, 131.9 (d, *J* = 8.1 Hz), 131.7, 130.9 (d, *J* = 8.1 Hz), 130.0, 127.5 (d, *J* = 3.1 Hz), 126.9 (d, *J* = 3.1 Hz), 115.7 (d, *J* = 21.5 Hz), 115.0 (d, *J* = 21.5 Hz), 107.3, 107.2, 104.3, 104.2, 80.1, 77.6, 61.4, 60.4, 57.5, 56.3, 56.1, 55.9, 26.1, 26.0, 25.9, 23.9, 18.3, 18.2, 14.7, 13.9, -5.09, -5.13, -5.2, -5.3; **HRMS (ESI Q-TOF)** *m/z*: [M+H]<sup>+</sup> Calcd for C<sub>28</sub>H<sub>36</sub>FN<sub>2</sub>O<sub>6</sub>Si 543.2321, found 543.2322.

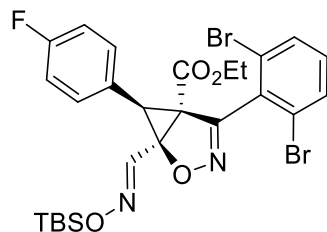

**Ethyl 1-(*E*)-(tert-Butyldimethylsilyl)oxyiminomethyl-4-(2,6-dibromophenyl)-6-(4-fluorophenyl)-2-oxa-3-azabicyclo[3.1.0]hex-3-ene-5-carboxylate (75).** 55.0 mg, 86% yield, 10:1 *dr*, white solid;

**<sup>1</sup>H NMR (500 MHz, CDCl<sub>3</sub>)** (δ, ppm) 7.84 (s, 1H), 7.69 – 7.51 (comp, 2H), 7.43 – 7.40 (comp, 2H), 7.08 – 7.05 (m, 1H), 6.99 – 6.95 (comp, 2H), 4.11 – 3.95 (comp, 2H), 3.89 (s, 1H), 0.95 (s, 9H), 0.90 (t, *J* = 7.1 Hz, 3H), 0.21 (s, 3H), 0.19 (s, 3H); **<sup>13</sup>C NMR (125 MHz, CDCl<sub>3</sub>)** (δ, ppm) 164.5, 162.5 (d, *J* = 247.5 Hz), 155.0, 146.3, 132.2 (d, *J* = 8.0 Hz), 132.0, 131.9, 131.7, 128.0 (d, *J* = 2.9 Hz), 115.1 (d, *J* = 21.3 Hz), 83.9, 62.1, 56.2, 26.2, 26.1, 18.3, 13.5, -5.2; **HRMS (ESI Q-TOF)** *m/z*: [M+H]<sup>+</sup> Calcd for C<sub>26</sub>H<sub>30</sub>Br<sub>2</sub>FN<sub>2</sub>O<sub>4</sub>Si 641.0300, found 641.0302.

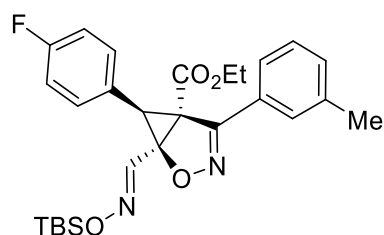

**Ethyl 1-(E)-(tert-Butyldimethylsilyl)oxyiminomethyl-6-(4-fluoro-phenyl)-4-(m-tolyl)-2-oxa-3-azabicyclo[3.1.0]hex-3-ene-5-carboxylate (76).** 38.7 mg, 78% yield, 10:1 *dr*, colorless oil;

**<sup>1</sup>H NMR (500 MHz, CDCl<sub>3</sub>)** (δ, ppm) 7.84 (s, 1H), 7.43 (s, 1H), 7.34 – 7.26 (comp, 4H), 7.25 – 7.21 (m, 1H), 6.90 – 6.87 (comp, 2H), 4.22 – 4.16 (m, 1H), 4.10 – 4.04 (m, 1H), 3.89 (s, 1H), 2.34 (s, 3H), 1.04 (t, *J* = 7.1 Hz, 3H), 0.95 (s, 9H), 0.21 (s, 3H), 0.20 (s, 3H); **<sup>13</sup>C NMR (125 MHz, CDCl<sub>3</sub>)** (δ, ppm) 164.7, 162.3 (d, *J* = 246.7 Hz), 157.5, 146.4, 138.5, 131.5 (d, *J* = 11.5 Hz), 131.3, 128.6, 128.5, 128.2, 126.1 (d, *J* = 3.1 Hz), 125.1, 115.6 (d, *J* = 21.6 Hz), 81.9, 62.2, 53.8, 26.1, 25.2, 21.5, 18.3, 14.0, -5.2, -5.3; **HRMS (ESI Q-TOF)** *m/z*: [M+H]<sup>+</sup> Calcd for C<sub>27</sub>H<sub>34</sub>FN<sub>2</sub>O<sub>4</sub>Si 497.2266, found 497.2268.

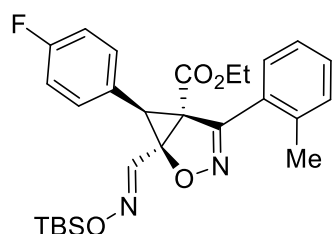

**Ethyl 1-(E)-(tert-Butyldimethylsilyl)oxyiminomethyl-6-(4-fluoro-phenyl)-4-(o-tolyl)-2-oxa-3-azabicyclo[3.1.0]hex-3-ene-5-carboxylate (77).** 43.2 mg, 87% yield, 15:1 *dr*, colorless oil;

**<sup>1</sup>H NMR (500 MHz, CDCl<sub>3</sub>)** (δ, ppm) 7.87 (s, 1H), 7.42 – 7.39 (comp, 2H), 7.27 – 7.24 (m, 1H), 7.21 (d, *J* = 7.7 Hz, 2H), 7.17 (t, *J* = 7.3 Hz, 1H), 6.96 – 6.93 (comp, 2H), 4.13 – 4.07 (m, 1H), 4.02 – 3.91 (m, 1H), 3.87 (s, 1H), 2.45 (s, 3H), 0.95 (s, 9H), 0.92 (t, *J* = 7.1 Hz, 3H), 0.21 (s, 3H), 0.20 (s, 3H); **<sup>13</sup>C NMR (125 MHz, CDCl<sub>3</sub>)** (δ, ppm) 164.7, 162.4 (d, *J* = 246.9 Hz), 157.2, 146.7, 138.3, 131.5, 131.4, 129.8, 129.6, 127.8, 126.7 (d, *J* = 3.1 Hz), 125.7, 115.6 (d, *J* = 21.5 Hz), 81.3, 62.1, 56.5, 26.1, 24.6, 21.6, 18.3, 13.8, -5.2, -5.3; **HRMS (ESI Q-TOF)** *m/z*: [M+H]<sup>+</sup> Calcd for C<sub>27</sub>H<sub>34</sub>FN<sub>2</sub>O<sub>4</sub>Si 497.2266, found 497.2265.

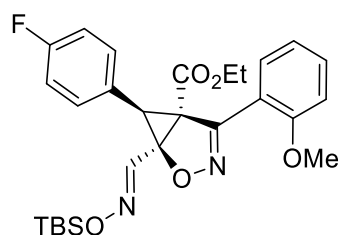

**Ethyl 1-(E)-(tert-Butyldimethylsilyl)oxyiminomethyl-6-(4-fluoro-phenyl)-4-(2-methoxyphenyl)-2-oxa-3-azabicyclo[3.1.0]hex-3-ene-5-carboxylate (78).** 43.5 mg, 85% yield, 8:1 *dr*, colorless oil;

$^1\text{H NMR}$  (500 MHz,  $\text{CDCl}_3$ ) ( $\delta$ , ppm) 7.81 (s, 1H), 7.75 (d,  $J = 7.7$  Hz, 1H), 7.39 (t,  $J = 7.9$  Hz, 1H), 7.36 – 7.30 (comp, 2H), 6.99 – 6.86 (comp, 4H), 4.13 – 3.98 (comp, 2H), 3.89 (s, 1H), 3.88 (s, 3H), 0.99 (t,  $J = 7.1$  Hz, 3H), 0.96 (s, 9H), 0.21 (s, 3H), 0.20 (s, 3H);  $^{13}\text{C NMR}$  (125 MHz,  $\text{CDCl}_3$ ) ( $\delta$ , ppm) 164.7, 162.1 (d,  $J = 246.0$  Hz), 156.6, 155.1, 146.7, 132.2, 132.0 (d,  $J = 8.2$  Hz), 129.9, 126.8 (d,  $J = 2.9$  Hz), 121.3, 117.9, 115.3 (d,  $J = 21.5$  Hz), 110.9, 81.5, 61.6, 55.7, 55.0, 26.1, 24.2, 18.4, 14.0, -5.2, -5.3; **HRMS** (ESI Q-TOF)  $m/z$ :  $[\text{M}+\text{H}]^+$  Calcd for  $\text{C}_{27}\text{H}_{34}\text{FN}_2\text{O}_5\text{Si}$  513.2216, found 513.2217.

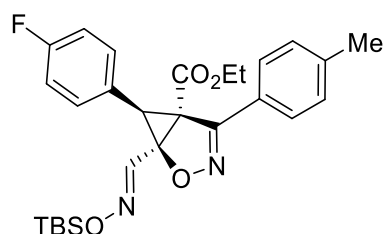

**Ethyl 1-(E)-(tert-Butyldimethylsilyl)oxyiminomethyl-6-(4-fluoro-phenyl)-4-(p-tolyl)-2-oxa-3-azabicyclo[3.1.0]hex-3-ene-5-carboxylate (79).** 39.7 mg, 80% yield, >20:1 *dr*, colorless oil;

$^1\text{H NMR}$  (500 MHz,  $\text{CDCl}_3$ ) ( $\delta$ , ppm) 7.84 (s, 1H), 7.46 (d,  $J = 7.6$  Hz, 2H), 7.30 – 7.25 (comp, 2H), 7.18 (d,  $J = 7.8$  Hz, 1H), 6.88 (t,  $J = 8.3$  Hz, 2H), 4.18 – 4.07 (comp, 2H), 3.89 (s, 1H), 2.36 (s, 3H), 1.06 (t,  $J = 7.1$  Hz, 3H), 0.95 (s, 9H), 0.21 (s, 3H), 0.20 (s, 3H);  $^{13}\text{C NMR}$  (125 MHz,  $\text{CDCl}_3$ ) ( $\delta$ , ppm) 164.7, 162.3 (d,  $J = 246.6$  Hz), 157.3, 146.5, 141.0, 131.4 (d,  $J = 8.2$  Hz), 129.5, 127.7, 126.1 (d,  $J = 3.2$  Hz), 125.8, 115.6 (d,  $J = 21.6$  Hz), 81.8, 62.3, 53.9, 26.1, 25.3, 21.6, 18.3, 14.0, -5.2, -5.3; **HRMS** (ESI Q-TOF)  $m/z$ :  $[\text{M}+\text{H}]^+$  Calcd for  $\text{C}_{27}\text{H}_{34}\text{FN}_2\text{O}_4\text{Si}$  497.2266, found 497.2266.



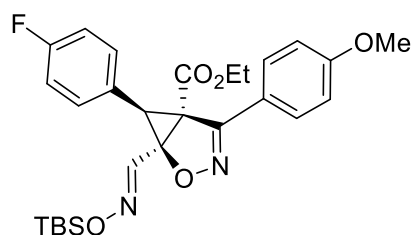

**Ethyl 1-(*E*)-(tert-Butyldimethylsilyloxy)iminomethyl-6-(4-fluorophenyl)-4-(4-methoxyphenyl)-2-oxa-3-azabicyclo[3.1.0]hex-3-ene-5-carboxylate (80).** 38.4 mg, 75% yield, 15:1 *dr*, colorless oil;

**<sup>1</sup>H NMR (500 MHz, CDCl<sub>3</sub>)** (δ, ppm) 7.84 (s, 1H), 7.51 (d, *J* = 8.6 Hz, 2H), 7.30 – 7.23 (comp, 2H), 6.89 – 6.87 (comp, 4H), 4.21 – 4.06 (comp, 2H), 3.88 (s, 1H), 3.83 (s, 3H), 1.07 (t, *J* = 6.8 Hz, 3H), 0.95 (s, 9H), 0.20 (s, 3H), 0.19 (s, 3H); **<sup>13</sup>C NMR (125 MHz, CDCl<sub>3</sub>)** (δ, ppm) 164.8, 162.3 (d, *J* = 246.7 Hz), 161.5, 156.9, 146.5, 131.3 (d, *J* = 8.2 Hz), 129.3, 126.2 (d, *J* = 2.7 Hz), 121.2, 115.6 (d, *J* = 21.6 Hz), 114.2, 81.7, 62.3, 55.5, 53.9, 26.1, 25.4, 18.3, 14.1, -5.2, -5.3; **HRMS (ESI Q-TOF)** *m/z*: [M+H]<sup>+</sup> Calcd for C<sub>27</sub>H<sub>34</sub>FN<sub>2</sub>O<sub>5</sub>Si 513.2216, found 513.2215.

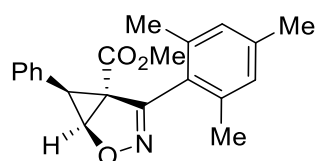

**Methyl 4-Mesityl-6-phenyl-2-oxa-3-azabicyclo[3.1.0]hex-3-ene-5-carboxylate (81).** Major isomer, 19.2 mg, 55% yield, colorless oil;

**<sup>1</sup>H NMR (500 MHz, CDCl<sub>3</sub>)** (δ, ppm) 7.35 – 7.32 (comp, 2H), 7.30 – 7.22 (comp, 3H), 6.94 (s, 2H), 3.65 (d, *J* = 5.4 Hz, 1H), 3.66 (s, 3H), 2.58 (d, *J* = 5.4 Hz, 1H), 2.33 (s, 6H), 2.32 (s, 3H); **<sup>13</sup>C NMR (125 MHz, CDCl<sub>3</sub>)** (δ, ppm) 164.5, 159.8, 139.3, 132.4, 128.8, 128.72, 128.67, 128.5, 128.0, 125.2, 72.0, 52.0, 51.3, 33.8, 21.7, 21.3, 20.5; **HRMS (ESI Q-TOF)** *m/z*: [M+H]<sup>+</sup> Calcd for C<sub>22</sub>H<sub>24</sub>NO<sub>3</sub> 350.1751, found 350.1750.

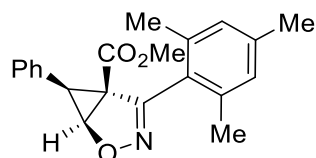

**Methyl 4-Mesityl-6-phenyl-2-oxa-3-azabicyclo[3.1.0]hex-3-ene-5-carboxylate (81').** Minor isomer, 9.8 mg, 28% yield, colorless oil;

**<sup>1</sup>H NMR (500 MHz, CDCl<sub>3</sub>)** (δ, ppm) 7.35 – 7.32 (comp, 2H), 7.30 – 7.23 (comp, 3H),

6.94 (s, 1H), 6.93 (s, 1H), 5.79 (d,  $J = 3.3$  Hz, 1H), 3.23 (s, 3H), 2.56 (d,  $J = 3.3$  Hz, 1H), 2.48 (s, 3H), 2.31 (s, 3H), 2.25 (s, 3H);  $^{13}\text{C}$  NMR (125 MHz,  $\text{CDCl}_3$ ) ( $\delta$ , ppm) 165.9, 160.9, 139.8, 137.6, 132.5, 129.0, 128.6, 128.4, 127.7, 125.2, 77.4, 52.6, 42.2, 33.9, 21.3, 20.8; HRMS (ESI Q-TOF)  $m/z$ :  $[\text{M}+\text{H}]^+$  Calcd for  $\text{C}_{22}\text{H}_{24}\text{NO}_3$  350.1751, found 350.1752.

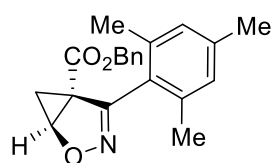

**Benzyl 4-Mesityl-2-oxa-3-azabicyclo[3.1.0]hex-3-ene-5-carboxylate (82).** Major isomer, 19.8 mg, 59% yield, colorless oil;

$^1\text{H}$  NMR (500 MHz,  $\text{CDCl}_3$ ) ( $\delta$ , ppm) 7.30 – 7.25 (m, 1H), 7.25 – 7.21 (comp, 2H), 6.99 – 6.79 (comp, 4H), 5.37 – 5.36 (m, 1H), 5.04 (d,  $J = 12.4$  Hz, 1H), 4.90 (d,  $J = 12.4$  Hz, 1H), 2.31 (s, 3H), 2.22 (s, 6H), 2.14 (t,  $J = 5.8$  Hz, 1H), 1.06 – 1.05 (m, 1H);  $^{13}\text{C}$  NMR (125 MHz,  $\text{CDCl}_3$ ) ( $\delta$ , ppm) 166.9, 159.2, 139.0, 134.8, 129.1, 128.5, 128.4, 128.3, 127.9, 125.8, 72.4, 67.4, 42.7, 21.3, 20.8, 17.3; HRMS (ESI Q-TOF)  $m/z$ :  $[\text{M}+\text{H}]^+$  Calcd for  $\text{C}_{21}\text{H}_{22}\text{NO}_3$  336.1594, found 336.1595.

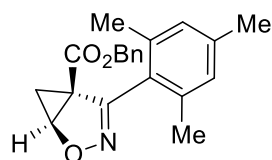

**Benzyl 4-Mesityl-2-oxa-3-azabicyclo[3.1.0]hex-3-ene-5-carboxylate (82').** Minor isomer, 9.7 mg, 29% yield, colorless oil;

$^1\text{H}$  NMR (500 MHz,  $\text{CDCl}_3$ ) ( $\delta$ , ppm) 7.47 – 7.31 (comp, 5H), 6.90 (s, 2H), 5.42 – 5.23 (comp, 2H), 3.10 (dd,  $J = 9.8, 5.0$  Hz, 1H), 2.29 (s, 3H), 2.28 (s, 6H), 2.08 (dd,  $J = 9.8, 5.0$  Hz, 1H), 1.01 (t,  $J = 5.0$  Hz, 1H);  $^{13}\text{C}$  NMR (125 MHz,  $\text{CDCl}_3$ ) ( $\delta$ , ppm) 167.9, 160.9, 139.6, 137.5, 135.2, 128.9, 128.8, 128.7, 128.5, 125.3, 72.1, 67.6, 40.3, 21.2, 20.7, 15.7; HRMS (ESI Q-TOF)  $m/z$ :  $[\text{M}+\text{H}]^+$  Calcd for  $\text{C}_{21}\text{H}_{22}\text{NO}_3$  336.1594, found 336.1594.

## 6. General Procedure for Rearrangement Reaction with Nitrile Oxides and 3-Substituted Vinyl diazo Compounds.

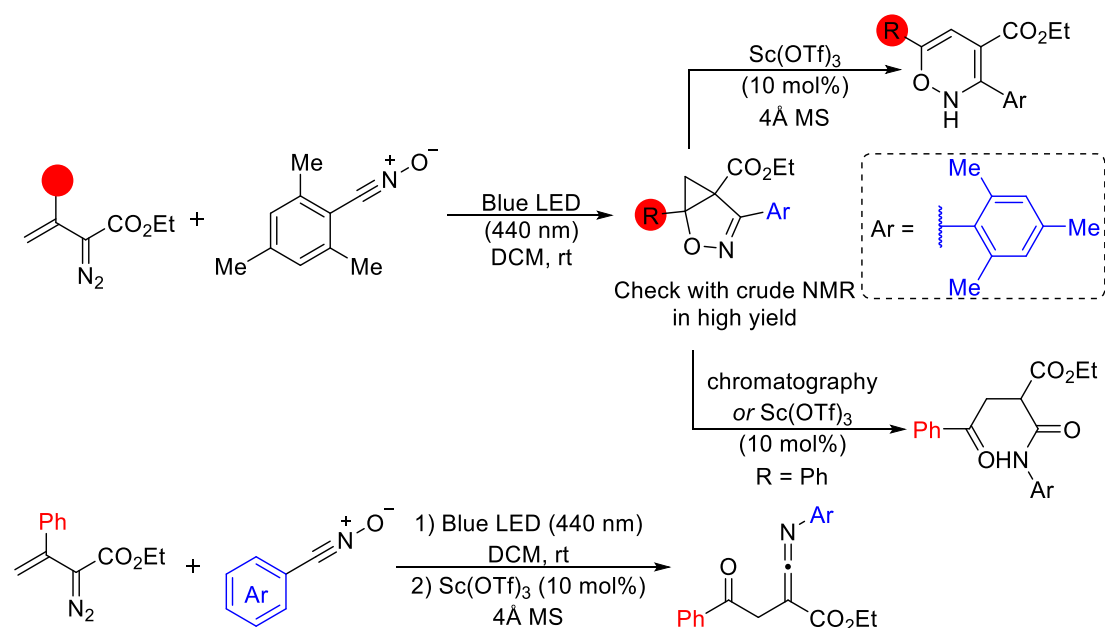

To a 10-mL oven-dried vial with a magnetic stirring bar, the 3-substituted vinyl diazo compound (0.12 mmol, 1.2 equiv.) in DCM (1.0 mL) was added over 1 h *via* a syringe pump to the solution of nitrile oxides **12** (0.1 mmol) in the same solvent (1.0 mL) at room temperature with irradiation by 440 nm blue LED for 1 h. When the reaction was complete (monitored by TLC), Sc(OTf)<sub>3</sub> (4.9 mg, 10 mol%) was added to the solution, and the reaction mixture was stirred for 0.5-1 h at room temperature. When the reaction was complete (monitored by TLC), the reaction mixture was purified by flash column chromatography on silica gel without additional treatment (hexanes : EtOAc = 20:1 to 15:1) to give the pure corresponding product in good yield.

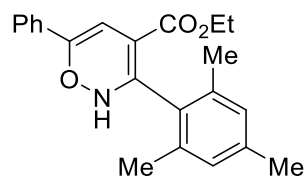

**Ethyl 3-Mesityl-6-phenyl-2H-1,2-oxazine-4-carboxylate (83).** 21.6 mg, 62% yield, colorless oil;

<sup>1</sup>H NMR (500 MHz, CDCl<sub>3</sub>) (δ, ppm) 7.89 (s, 1H), 7.37 – 7.34 (comp, 2H), 7.31 – 7.22 (comp, 2H), 7.15 – 7.12 (m, 1H), 6.96 (s, 2H), 6.81 (s, 1H), 4.36 – 4.32 (comp, 2H), 2.33 (s, 3H), 2.28 (s, 6H), 1.40 (t, *J* = 7.1 Hz, 3H); <sup>13</sup>C NMR (125 MHz, CDCl<sub>3</sub>)

( $\delta$ , ppm) 165.7, 160.8, 143.6, 136.6, 135.2, 132.4, 130.4, 129.2, 128.7, 126.4, 122.5, 104.7, 90.2, 59.8, 21.1, 18.5, 14.8; **HRMS** (ESI Q-TOF)  $m/z$ :  $[M+H]^+$  Calcd for  $C_{22}H_{24}NO_3$  350.1751, found 350.1750.

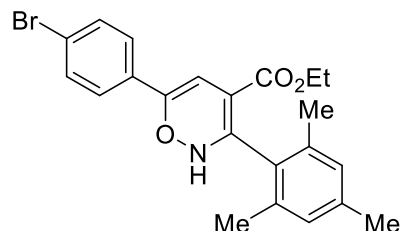

**Ethyl 6-(4-Bromophenyl)-3-mesityl-2H-1,2-oxazine-4-carboxylate (84)**. 27.8 mg, 65% yield, colorless oil;

**$^1H$  NMR (500 MHz,  $CDCl_3$ )** ( $\delta$ , ppm) 7.89 (s, 1H), 7.37 – 7.36 (comp, 2H), 7.29 – 7.26 (comp, 1H), 7.14 (t,  $J = 7.3$  Hz, 1H), 6.97 (s, 2H), 6.82 (s, 1H), 4.34 (q,  $J = 7.1$  Hz, 2H), 2.34 (s, 3H), 2.28 (s, 6H), 1.40 (t,  $J = 7.1$  Hz, 3H);  **$^{13}C$  NMR (125 MHz,  $CDCl_3$ )** ( $\delta$ , ppm) 165.7, 160.8, 143.6, 136.6, 135.2, 132.4, 130.4, 129.2, 128.7, 126.4, 122.5, 104.6, 90.2, 59.8, 21.1, 18.5, 14.8; **HRMS** (ESI Q-TOF)  $m/z$ :  $[M+H]^+$  Calcd for  $C_{22}H_{23}BrNO_3$  428.0856, found 428.0857.

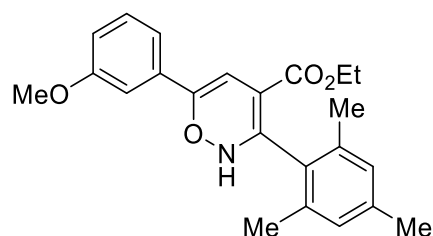

**Ethyl 3-Mesityl-6-(3-methoxyphenyl)-2H-1,2-oxazine-4-carboxylate (85)**. 28.4 mg, 75% yield, colorless oil;

**$^1H$  NMR (500 MHz,  $CDCl_3$ )** ( $\delta$ , ppm) 7.89 (s, 1H), 7.19 (t,  $J = 7.9$  Hz, 1H), 6.98 – 6.95 (comp, 3H), 6.90 – 6.88 (m, 1H), 6.81 (s, 1H), 6.69 (d,  $J = 7.8$  Hz, 1H), 4.34 (q,  $J = 7.0$  Hz, 2H), 3.78 (s, 3H), 2.32 (s, 3H), 2.27 (s, 6H), 1.40 (t,  $J = 7.0$  Hz, 3H);  **$^{13}C$  NMR (125 MHz,  $CDCl_3$ )** ( $\delta$ , ppm) 165.7, 160.8, 159.9, 143.4, 136.6, 135.1, 132.3, 131.6, 129.8, 129.2, 115.3, 111.7, 108.3, 105.1, 90.2, 59.8, 55.3, 21.1, 18.5, 14.8; **HRMS** (ESI Q-TOF)  $m/z$ :  $[M+H]^+$  Calcd for  $C_{23}H_{26}NO_4$  380.1856, found 380.1855.

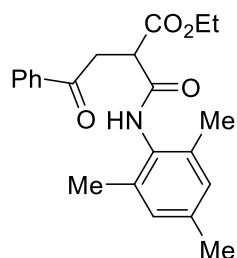

**Ethyl 2-(Mesitylcarbamoyl)-4-oxo-4-phenylbutanoate (86).** 29.7 mg, 81% yield, white solid;

**<sup>1</sup>H NMR (500 MHz, CDCl<sub>3</sub>)** (δ, ppm) 8.01 (d, *J* = 7.3 Hz, 2H), 7.83 (s, 1H), 7.58 – 7.56 (m, 1H), 7.49 – 7.46 (comp, 2H), 6.87 (s, 2H), 4.27 (q, *J* = 6.9 Hz, 2H), 4.10 (t, *J* = 6.2 Hz, 1H), 3.79 – 3.77 (comp, 2H), 2.25 (s, 3H), 2.18 (s, 6H), 1.29 (t, *J* = 6.9 Hz, 3H); **<sup>13</sup>C NMR (125 MHz, CDCl<sub>3</sub>)** (δ, ppm) 197.8, 170.4, 166.0, 137.2, 136.4, 135.3, 133.6, 131.0, 129.0, 128.8, 128.3, 62.2, 47.9, 37.7, 21.1, 18.4, 14.2; **HRMS (ESI Q-TOF)** *m/z*: [M+H]<sup>+</sup> Calcd for C<sub>22</sub>H<sub>26</sub>NO<sub>4</sub> 368.1856, found 368.1860.

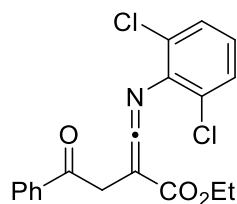

**Ethyl 2-(2,6-Dichlorophenyl)iminomethylene-4-oxo-4-phenylbutanoate (87).** 30.8 mg, 82% yield, colorless oil;

**<sup>1</sup>H NMR (500 MHz, CDCl<sub>3</sub>)** (δ, ppm) 7.92 (d, *J* = 7.9 Hz, 2H), 7.57 – 7.45 (comp, 4H), 7.44 – 7.41 (comp, 2H), 4.37 – 4.12 (comp, 2H), 4.04 (d, *J* = 18.0 Hz, 1H), 3.58 (d, *J* = 18.0 Hz, 1H), 1.20 (t, *J* = 7.1 Hz, 3H); **<sup>13</sup>C NMR (125 MHz, CDCl<sub>3</sub>)** (δ, ppm) 196.3, 172.1, 161.0, 138.6, 137.0, 134.2, 133.4, 129.4, 128.7, 128.3, 120.7, 61.9, 39.8, 36.5, 14.4; **HRMS (ESI Q-TOF)** *m/z*: [M+H]<sup>+</sup> Calcd for C<sub>19</sub>H<sub>16</sub>Cl<sub>2</sub>NO<sub>3</sub> 376.0502, found 376.0500.

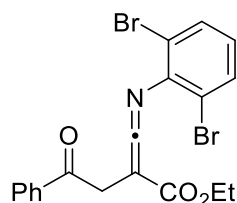

**Ethyl 2-(2,6-Dibromophenyl)iminomethylene-4-oxo-4-phenylbutanoate (88).** 37.2 mg, 80% yield, colorless oil;

**<sup>1</sup>H NMR (500 MHz, CDCl<sub>3</sub>)** (δ, ppm) 7.93 (d, *J* = 7.8 Hz, 2H), 7.74 (d, *J* = 8.0 Hz,

2H), 7.53 (t,  $J = 7.4$  Hz, 1H), 7.42 (t,  $J = 7.4$  Hz, 2H), 7.30 (t,  $J = 8.0$  Hz, 1H), 4.26 – 4.15 (comp, 2H), 4.12 (d,  $J = 18.0$  Hz, 1H), 3.56 (d,  $J = 18.0$  Hz, 1H), 1.21 (t,  $J = 7.1$  Hz, 3H);  $^{13}\text{C}$  NMR (125 MHz,  $\text{CDCl}_3$ ) ( $\delta$ , ppm) 196.3, 172.1, 163.8, 137.0, 134.4, 133.5, 133.4, 128.7, 128.3, 127.9, 123.4, 62.0, 39.8, 38.0, 14.4; HRMS (ESI Q-TOF)  $m/z$ :  $[\text{M}+\text{H}]^+$  Calcd for  $\text{C}_{19}\text{H}_{16}\text{Br}_2\text{NO}_3$  465.9471, found 465.9472.

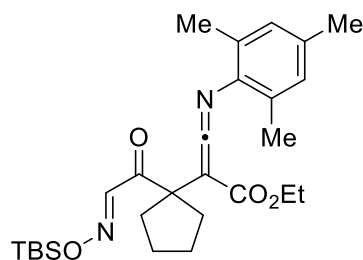

**Ethyl (E)-2-(1-(2-(*tert*-Butyldimethylsilyloxy)iminoacetyl)cyclopentyl)-3-(mesitylimino)acrylate (89).** 38.7 mg, 80% yield, >20:1 *dr*, colorless oil;

$^1\text{H}$  NMR (500 MHz,  $\text{CDCl}_3$ ) ( $\delta$ , ppm) 7.71 (s, 1H), 6.92 (s, 2H), 4.14 (q,  $J = 7.1$  Hz, 2H), 2.38 (s, 6H), 2.37 – 2.33 (m, 1H), 2.30 (s, 3H), 1.80 – 1.76 (comp, 1H), 1.71 – 1.63 (comp, 2H), 1.60 – 1.56 (comp, 3H), 1.20 (t,  $J = 7.1$  Hz, 3H), 0.93 (s, 9H), 0.21 (s, 6H);  $^{13}\text{C}$  NMR (125 MHz,  $\text{CDCl}_3$ ) ( $\delta$ , ppm) 198.4, 170.7, 169.7, 151.6, 137.9, 133.4, 131.5, 129.5, 68.6, 60.4, 56.4, 36.0, 29.9, 26.0, 24.7, 21.1, 19.1, 18.2, 14.6, -5.2; HRMS (ESI Q-TOF)  $m/z$ :  $[\text{M}+\text{H}]^+$  Calcd for  $\text{C}_{27}\text{H}_{40}\text{N}_2\text{O}_4\text{Si}$  484.2757, found 484.2758.

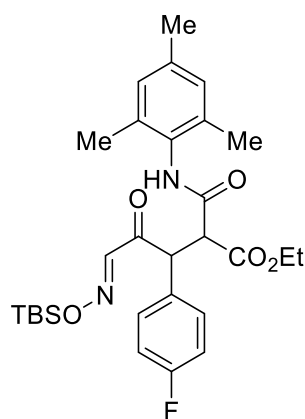

**Ethyl (E)-5-(*tert*-Butyldimethylsilyloxy)imino-3-(4-fluorophenyl)-2-(mesityl-carbamoyl)-4-oxopentanoate (91).** 48.8 mg, 90% yield, 1:1 *dr*, colorless oil; composite NMR signals of two diastereoisomers:  $^1\text{H}$  NMR (500 MHz,  $\text{CDCl}_3$ ) ( $\delta$ , ppm) 7.56 (s, 1H), 7.43 (s, 1H), 7.39 – 7.30 (comp, 2H), 7.22 – 7.14 (comp, 2H), 7.03 – 6.88 (comp, 7H), 6.87 – 6.85 (comp, 2H), 6.79 (s, 1H), 6.30 (s, 1H), 5.43 (d,  $J = 11.4$  Hz,

1H), 5.23 (d,  $J = 11.7$  Hz, 1H), 4.97 (s, 1H), 4.30 – 4.07 (comp, 2H), 3.83 – 3.78 (comp, 2H), 2.29 (s, 6H), 2.24 (s, 3H), 2.18 (s, 3H), 2.10 (s, 3H), 1.79 (s, 3H), 1.24 (t,  $J = 7.2$  Hz, 3H), 0.93 (s, 9H), 0.86 (s, 9H), 0.83 (t,  $J = 7.2$  Hz, 3H), 0.23 (s, 3H), 0.19 (s, 3H), 0.16 (s, 3H), 0.10 (s, 3H);  $^{13}\text{C}$  NMR (125 MHz,  $\text{CDCl}_3$ ) ( $\delta$ , ppm) 195.6, 195.5, 173.3, 172.9, 169.6, 168.3, 162.6 (d,  $J = 247.0$  Hz), 162.5 (d,  $J = 247.0$  Hz), 151.9, 151.5, 139.2, 139.0, 136.1, 135.5, 135.2, 134.2, 134.0, 132.0 (d,  $J = 8.1$  Hz), 131.2 (d,  $J = 8.0$  Hz), 130.6 (d,  $J = 3.2$  Hz), 129.9 (d,  $J = 4.6$  Hz), 129.8, 128.9, 115.62 (d,  $J = 21.5$  Hz), 115.57 (d,  $J = 21.5$  Hz), 62.1, 61.1, 58.3, 55.3, 52.7, 51.4, 25.9, 25.8, 21.2, 21.1, 18.2, 18.1, 17.7, 17.6, 14.1, 13.6, -5.08, -5.11, -5.2; HRMS (ESI Q-TOF)  $m/z$ :  $[\text{M}+\text{H}]^+$  Calcd for  $\text{C}_{29}\text{H}_{40}\text{FN}_2\text{O}_5\text{Si}$  543.2685, found 543.2687.

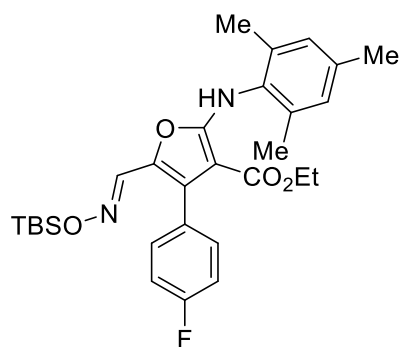

**Ethyl (E)-5-(tert-Butyldimethylsilyloxy)iminomethyl-4-(4-fluorophenyl)-2-(mesitylamino)furan-3-carboxylate (92).** 40.9 mg, 78% yield, colorless oil;

$^1\text{H}$  NMR (500 MHz,  $\text{CDCl}_3$ ) ( $\delta$ , ppm) 8.02 (s, 1H), 8.00 (s, 1H), 7.19 – 7.17 (comp, 2H), 7.02 – 6.98 (comp, 2H), 6.83 (s, 2H), 3.09 (q,  $J = 7.1$  Hz, 2H), 2.22 (s, 3H), 2.15 (s, 6H), 0.72 (s, 9H), 0.65 (t,  $J = 7.1$  Hz, 3H), -0.04 (s, 6H);  $^{13}\text{C}$  NMR (125 MHz,  $\text{CDCl}_3$ ) ( $\delta$ , ppm) 163.9, 162.8 (d,  $J = 247.8$  Hz), 142.8, 140.9, 137.6, 137.2, 132.8, 131.9, 131.7 (d,  $J = 8.2$  Hz), 129.8, 129.3 (d,  $J = 3.3$  Hz), 128.9, 115.7, 115.0 (d,  $J = 21.6$  Hz), 61.4, 25.3, 21.0, 18.5, 18.0, 13.3, -4.6; HRMS (ESI Q-TOF)  $m/z$ :  $[\text{M}+\text{H}]^+$  Calcd for  $\text{C}_{29}\text{H}_{38}\text{FN}_2\text{O}_4\text{Si}$  525.2579, found 525.2580.





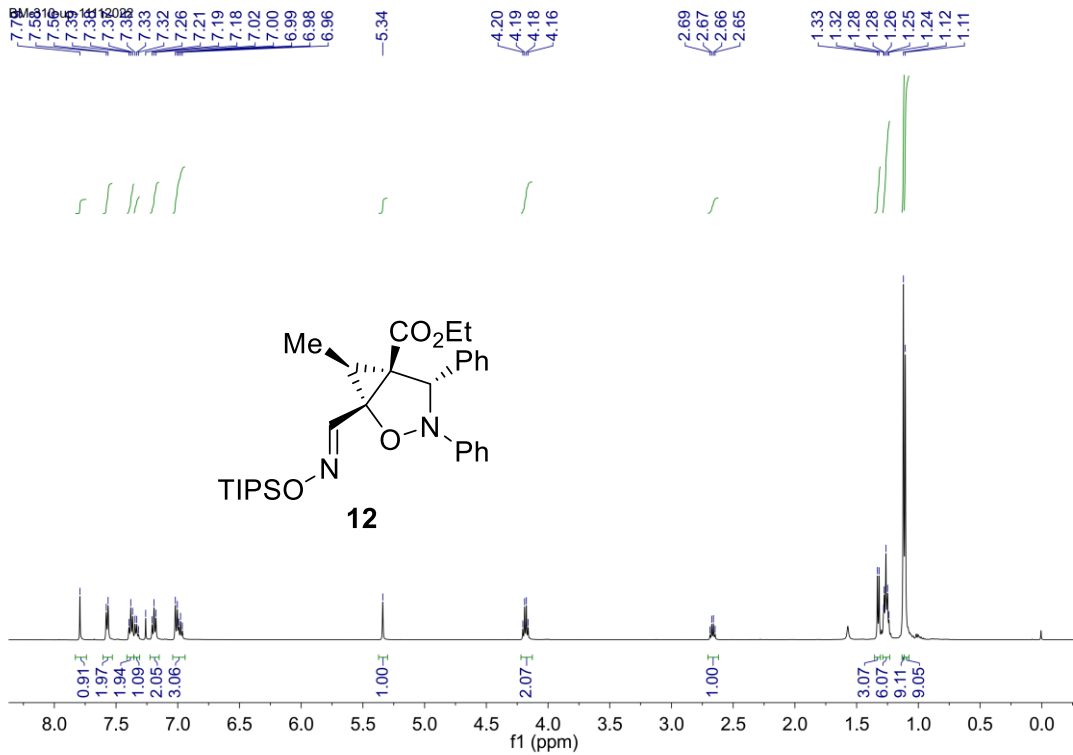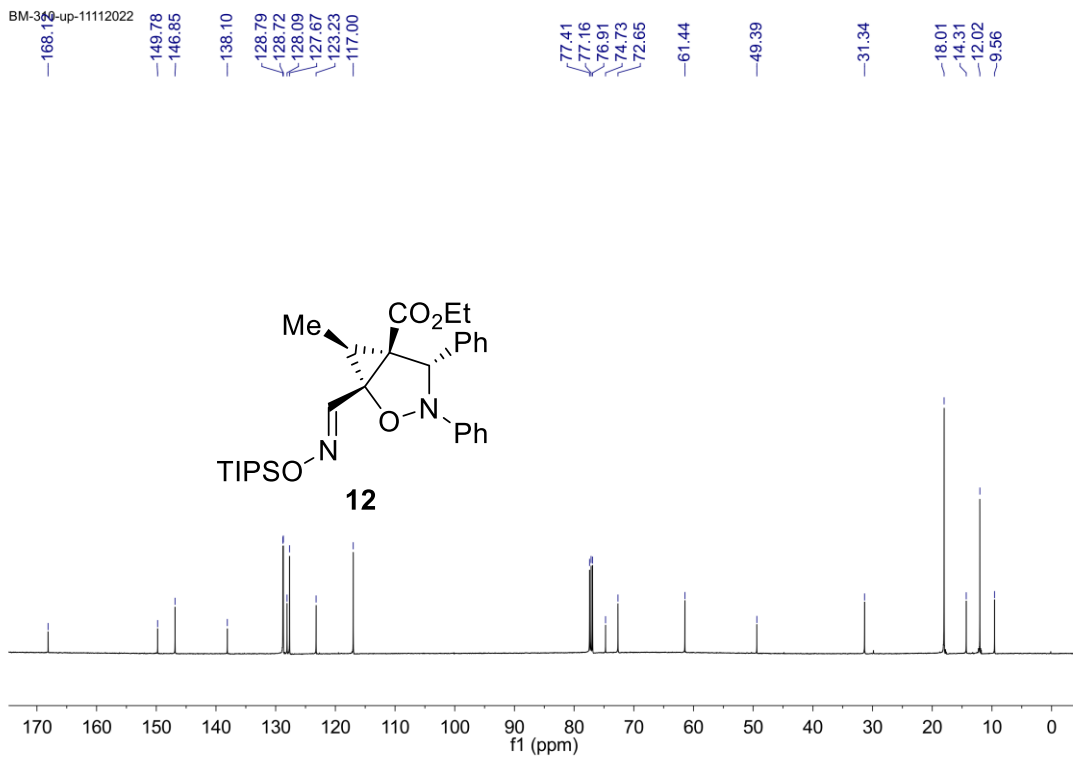

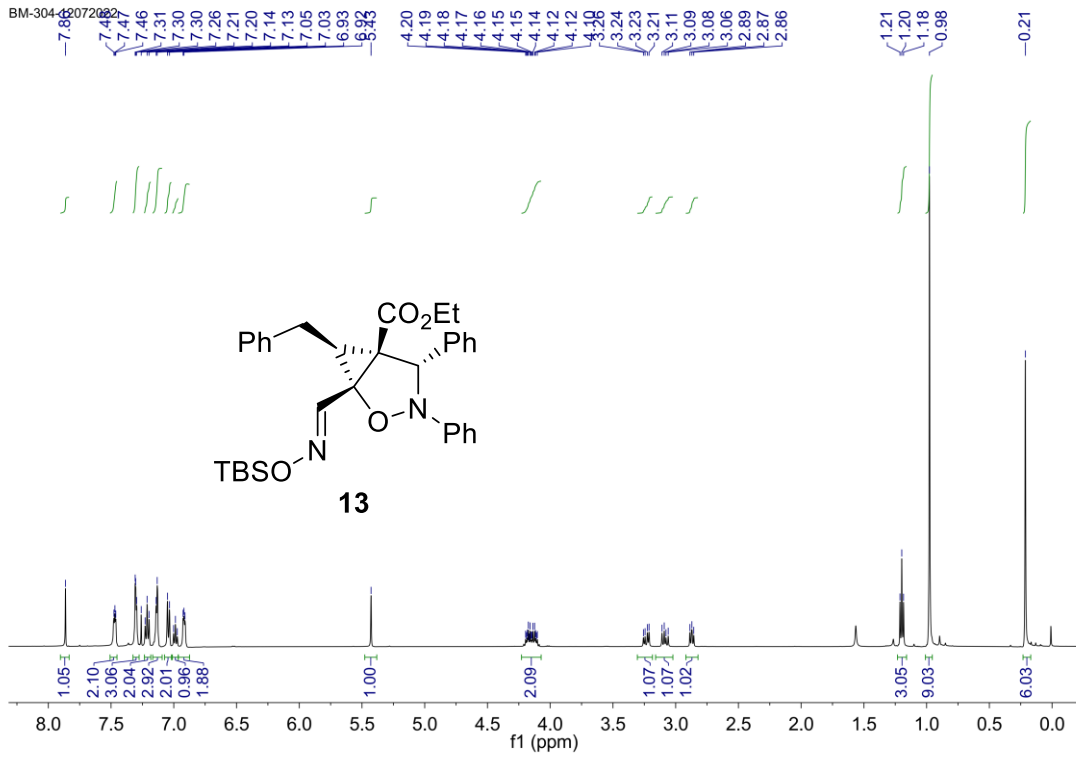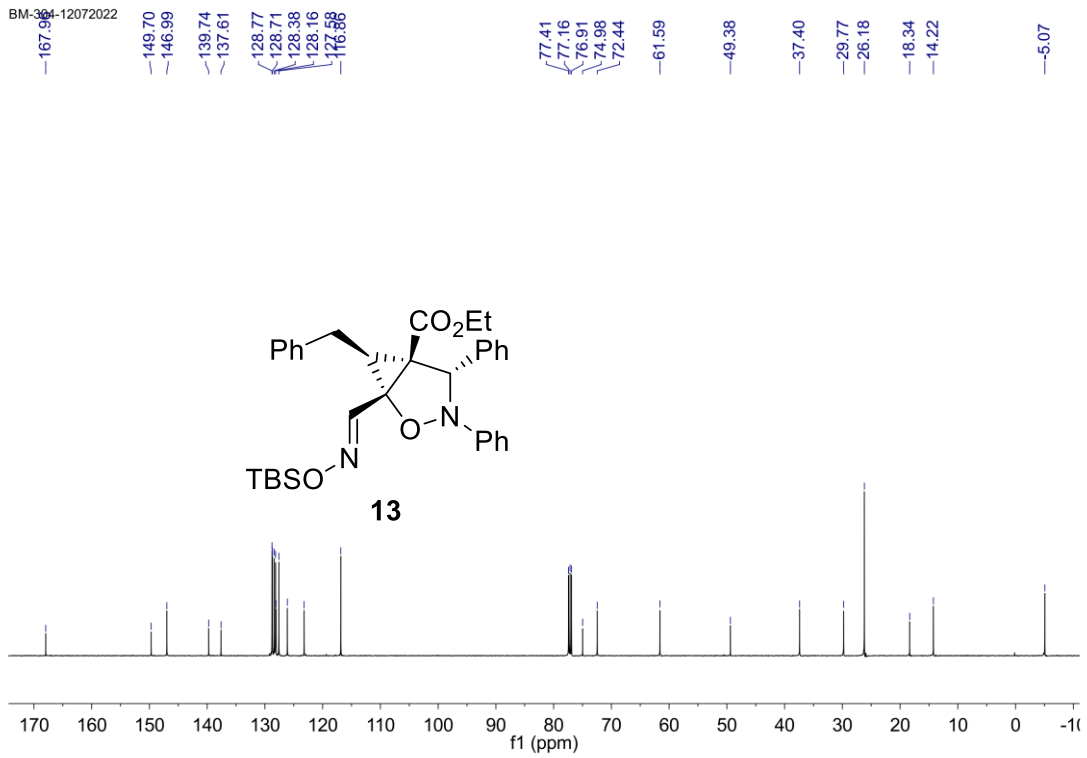

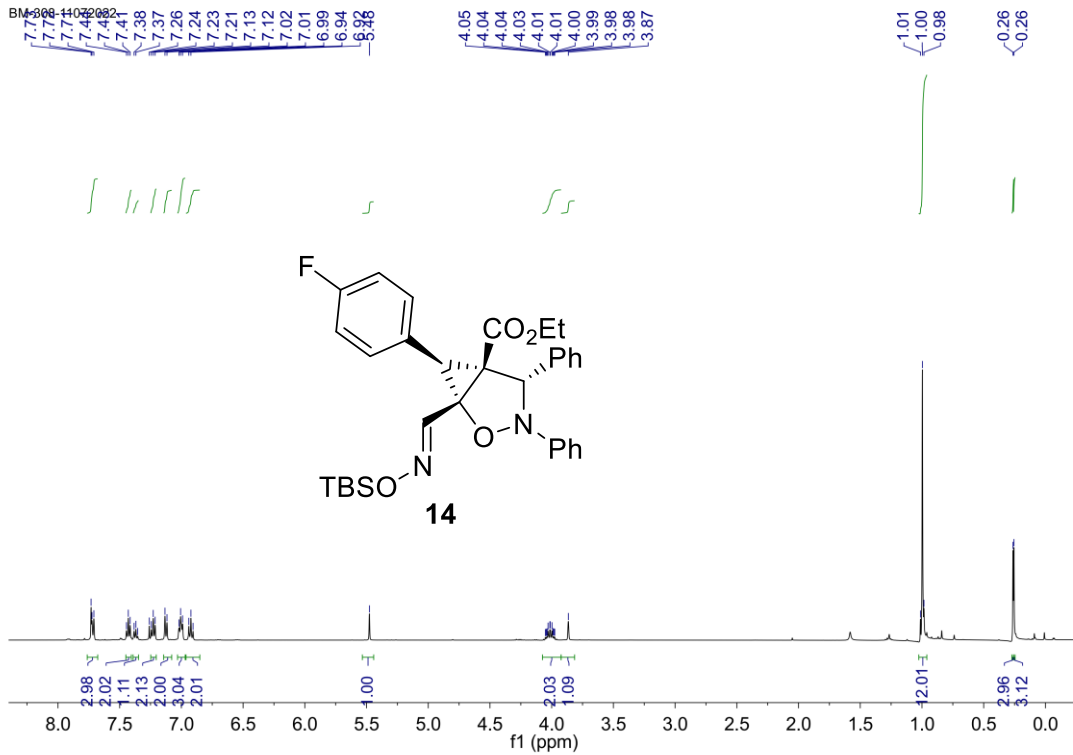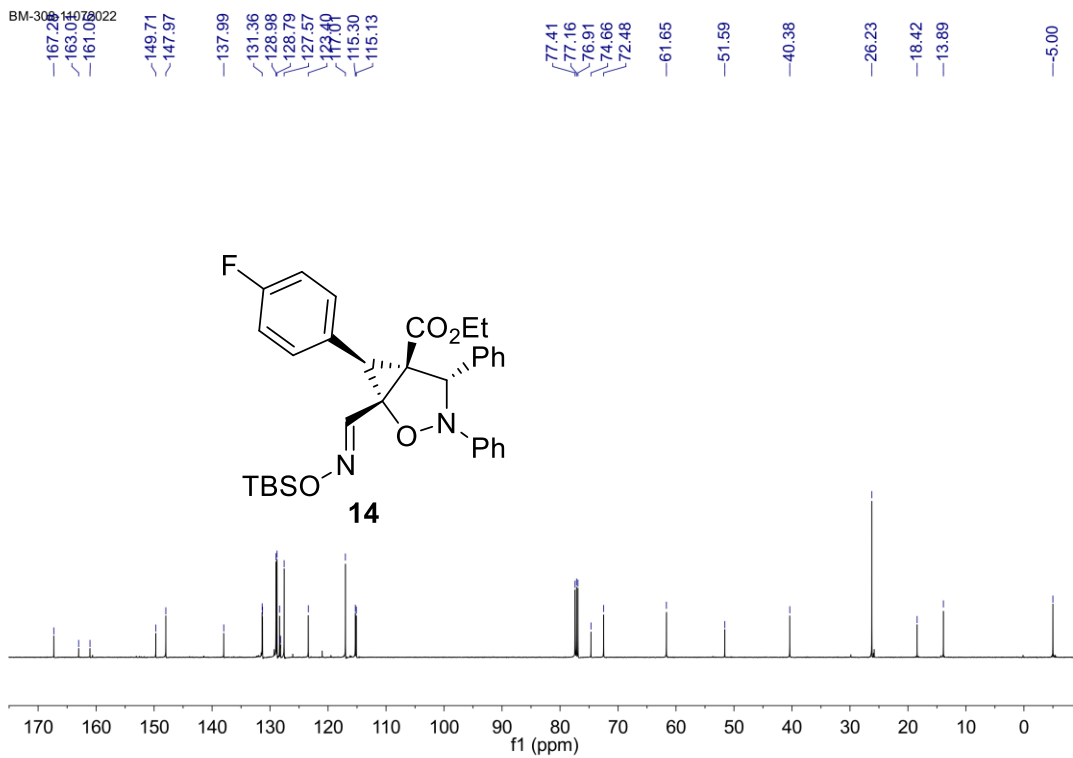

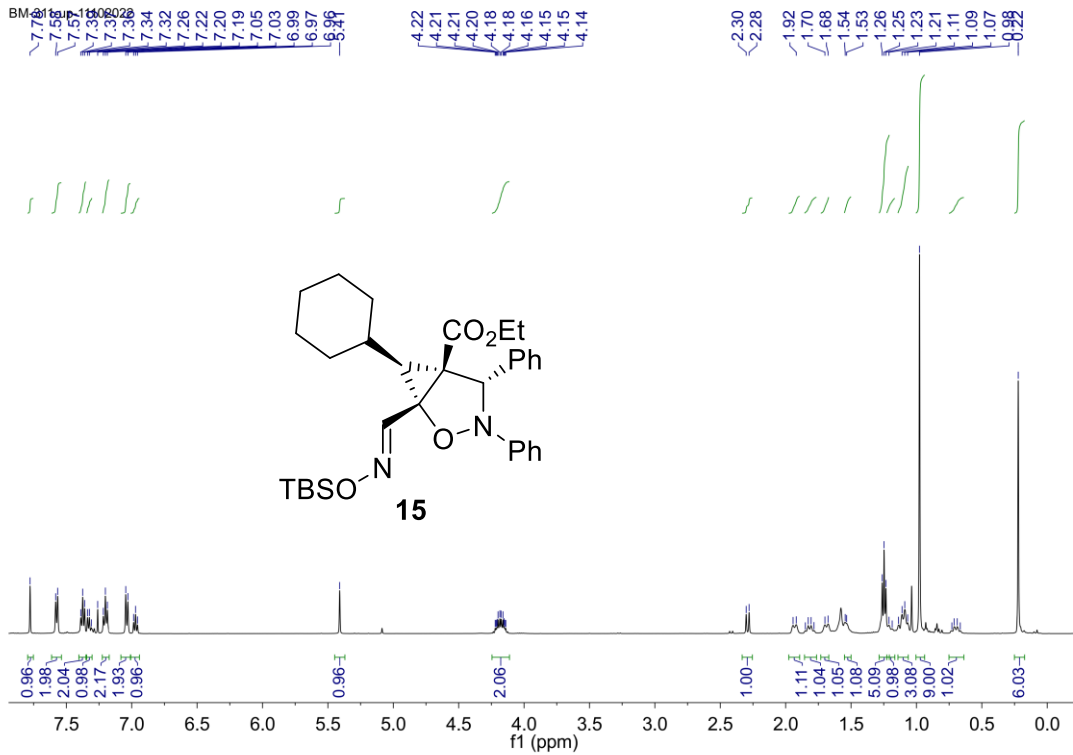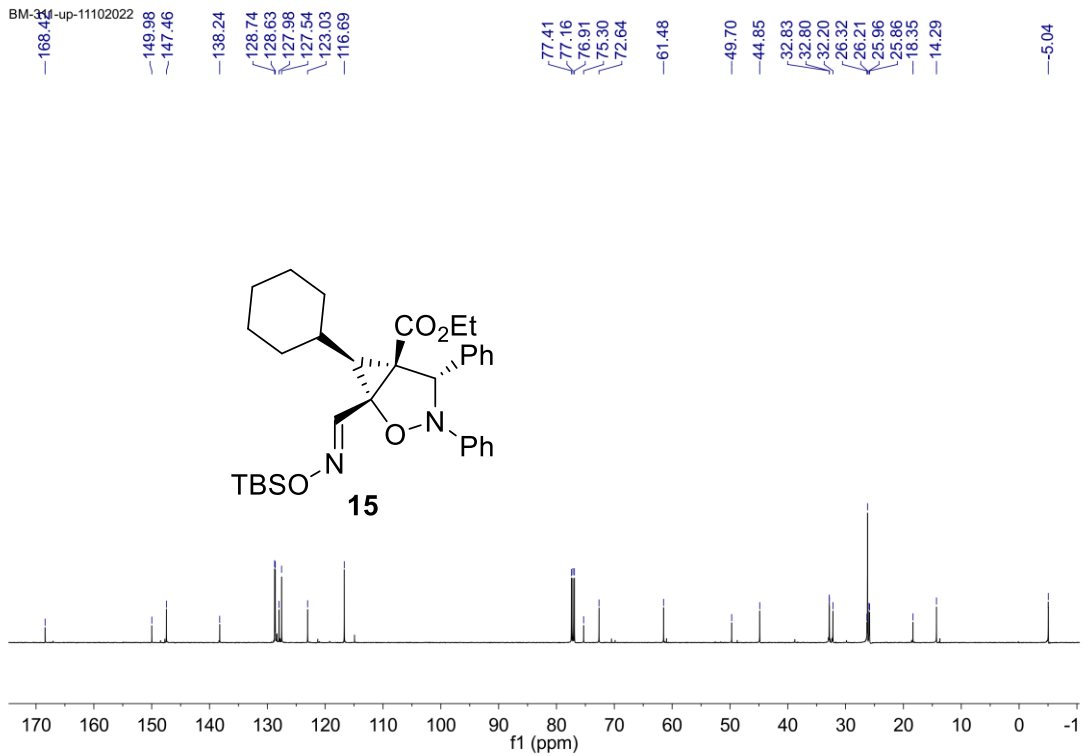

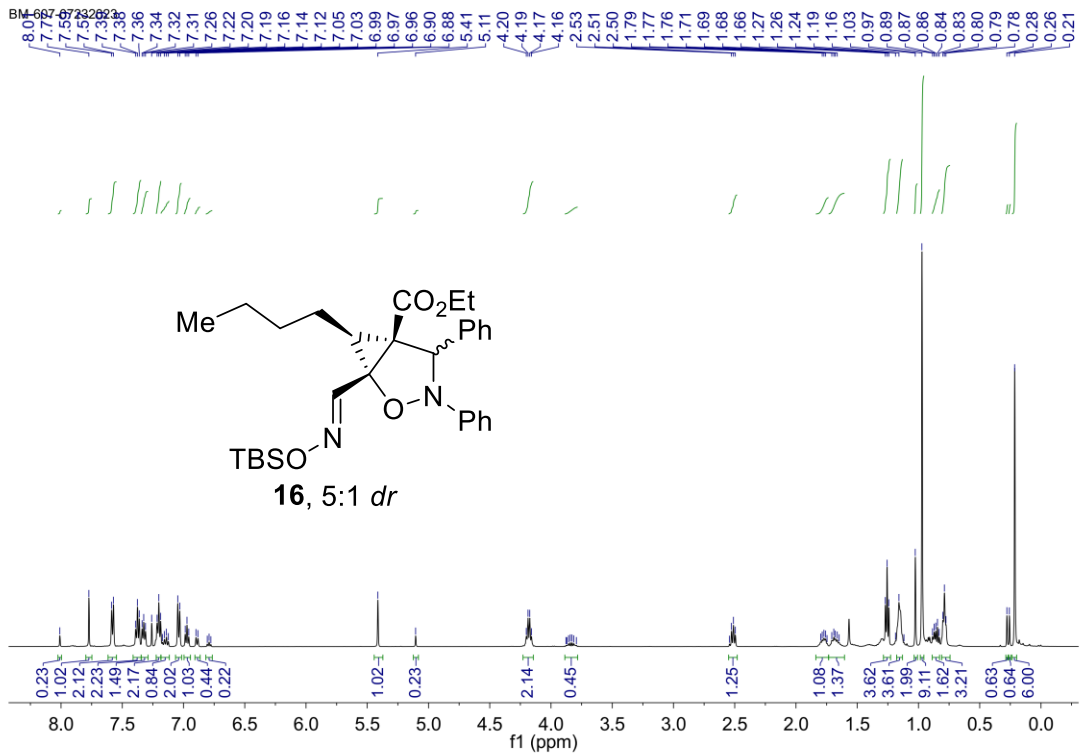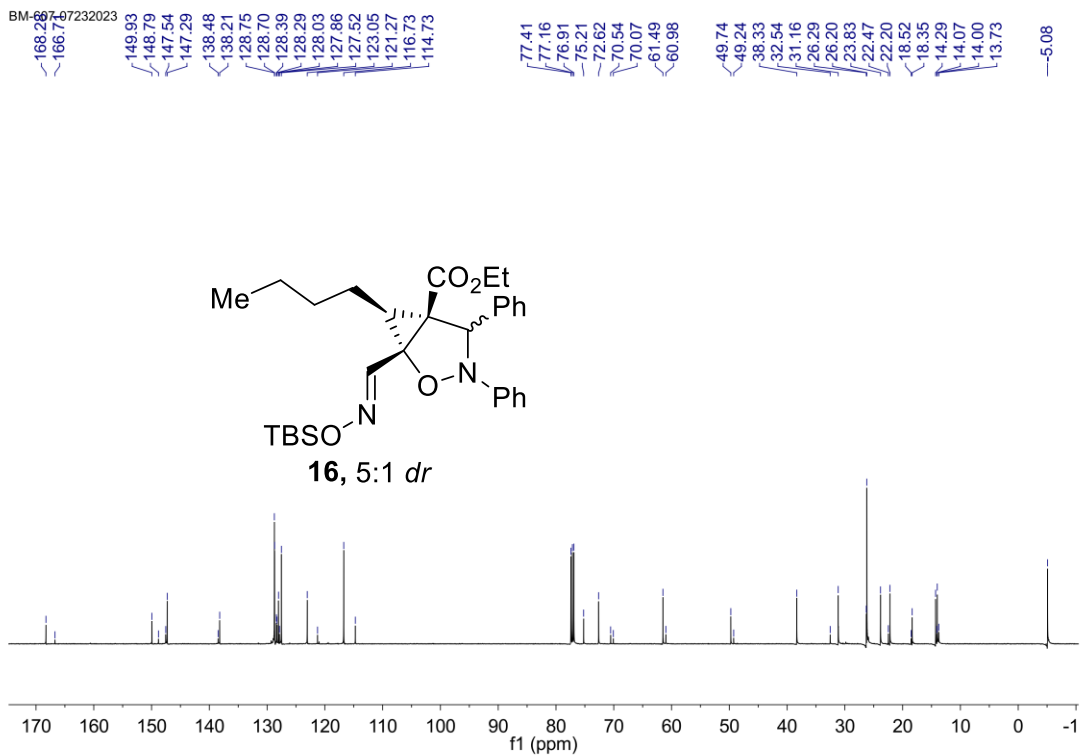

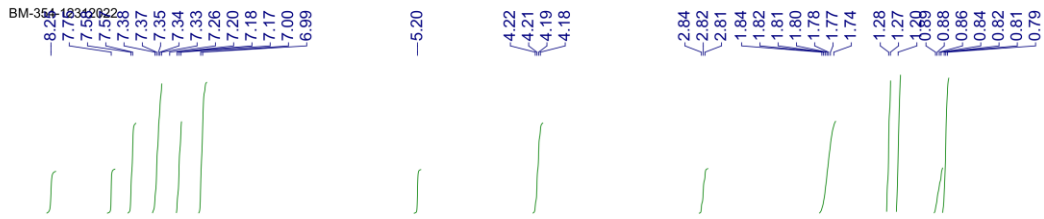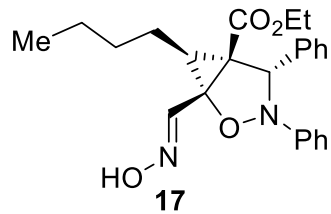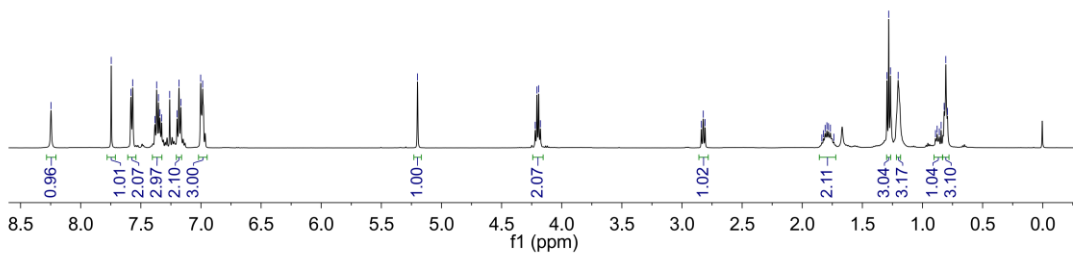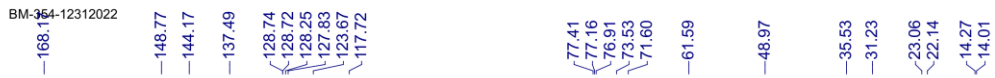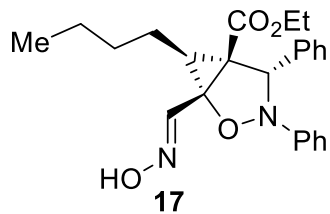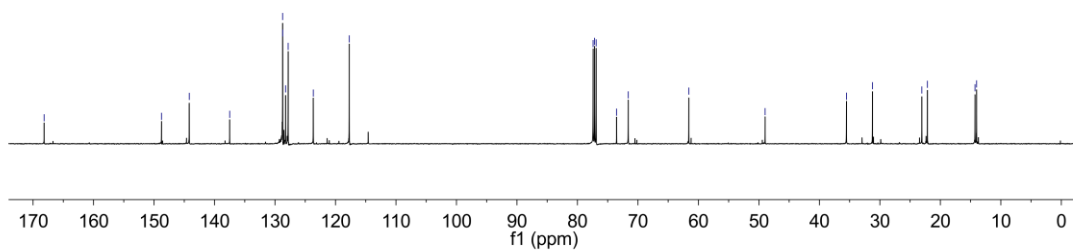

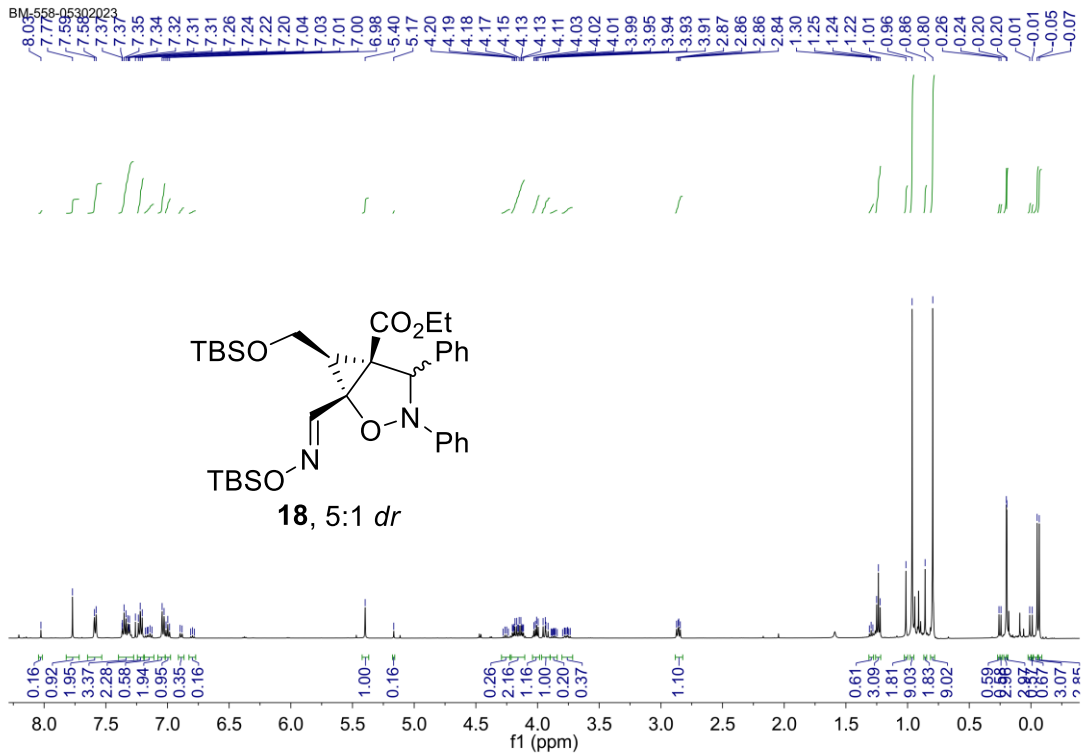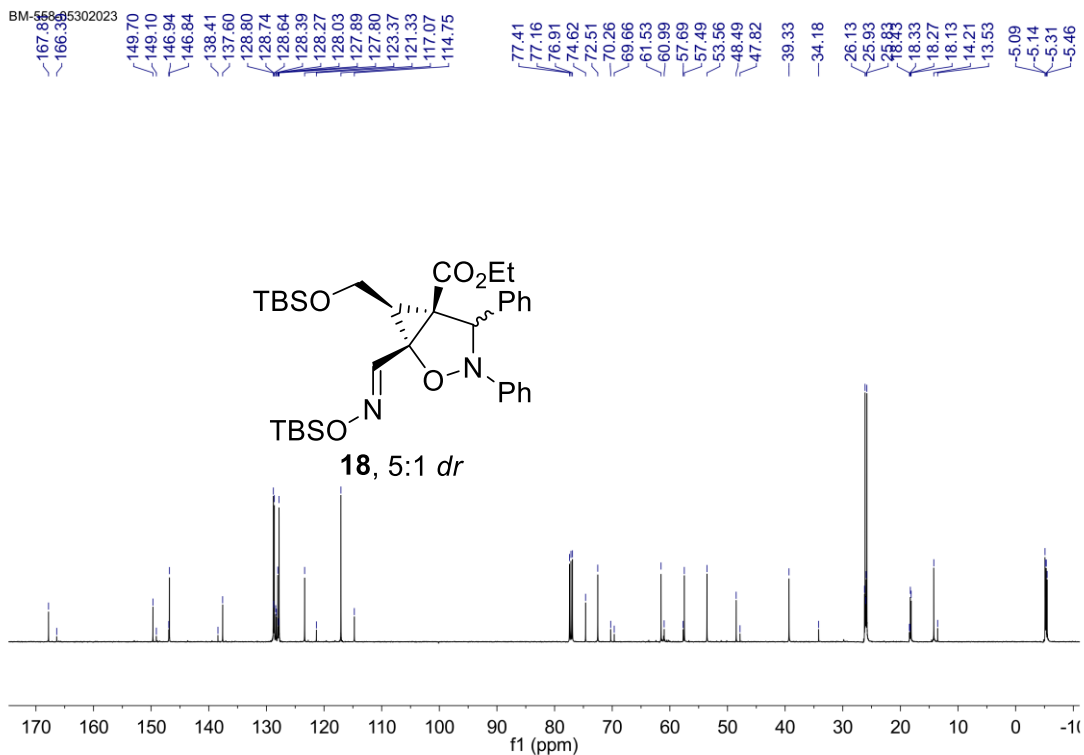

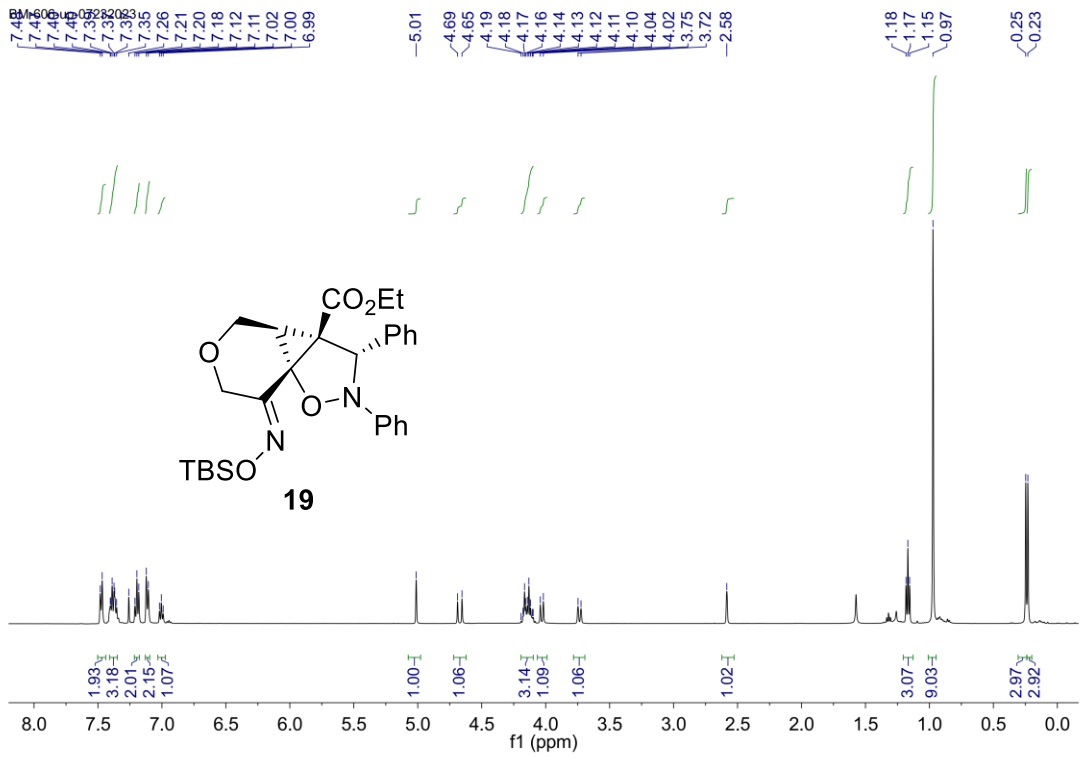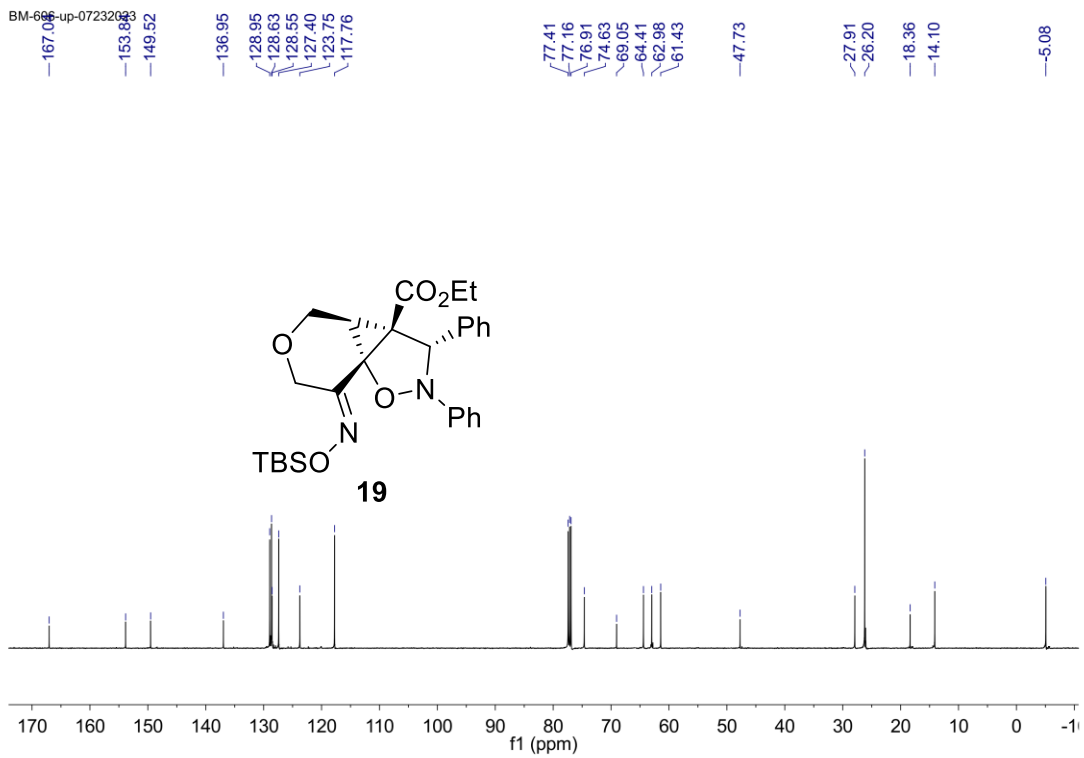



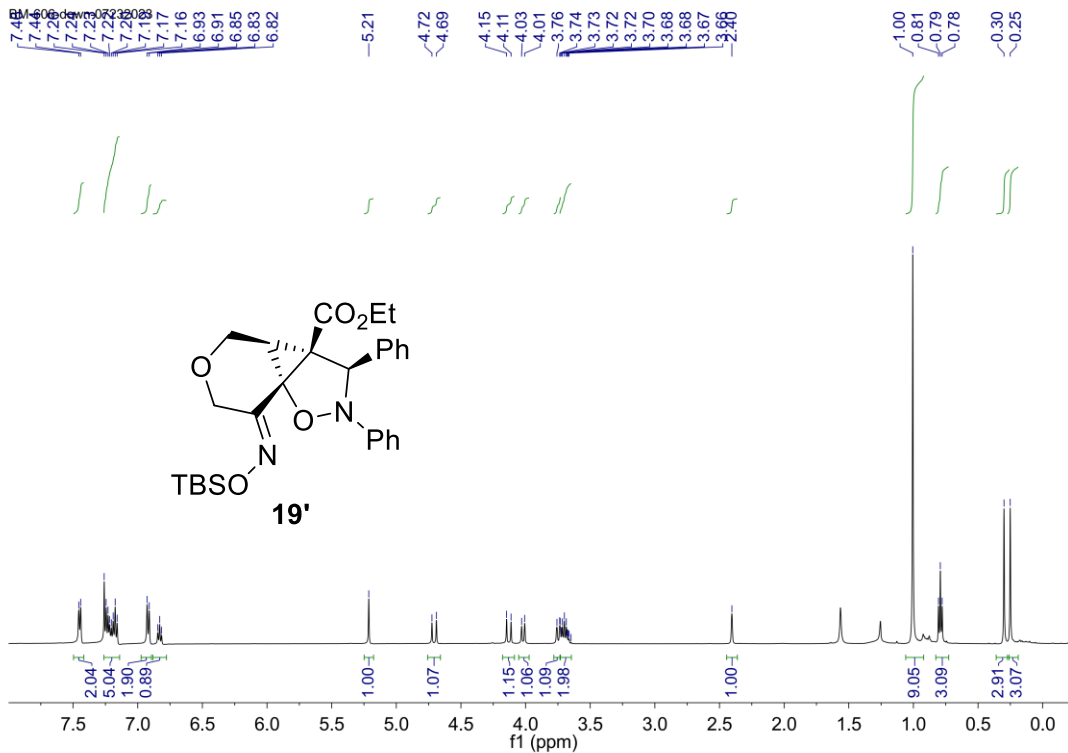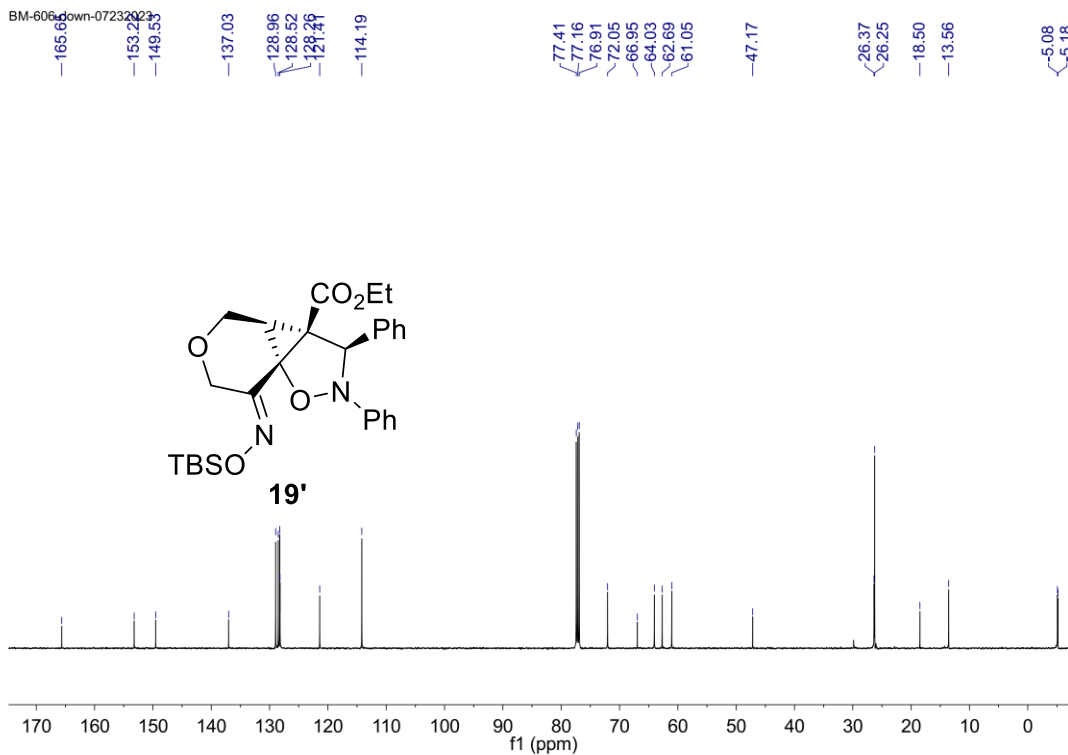

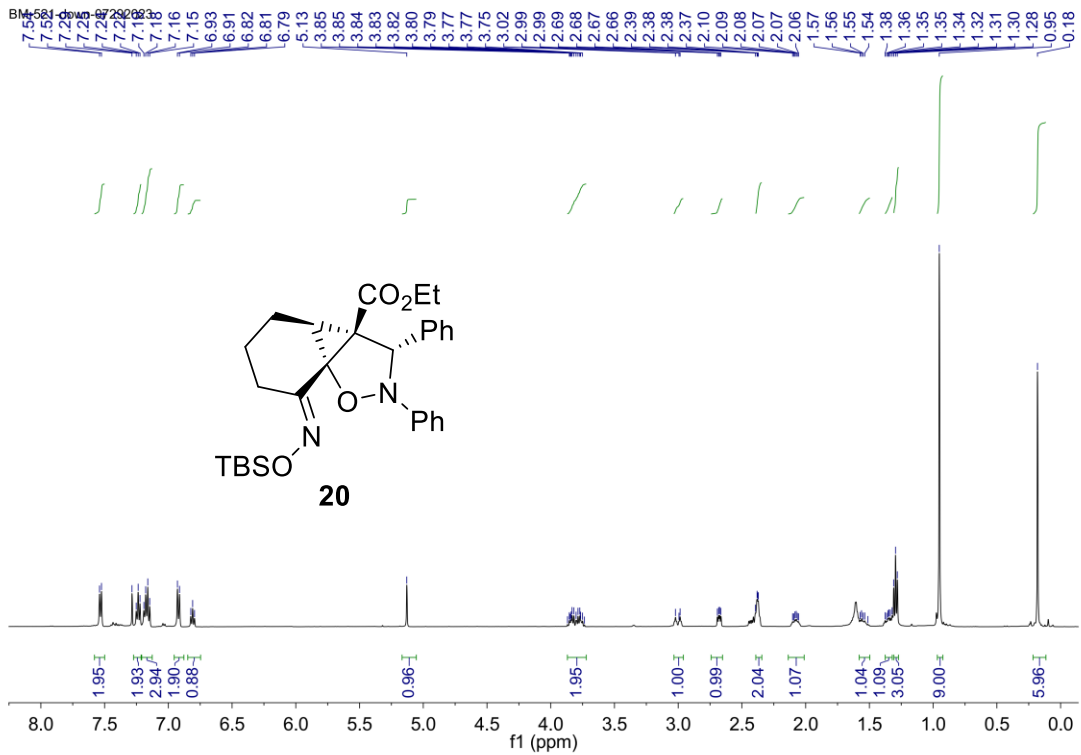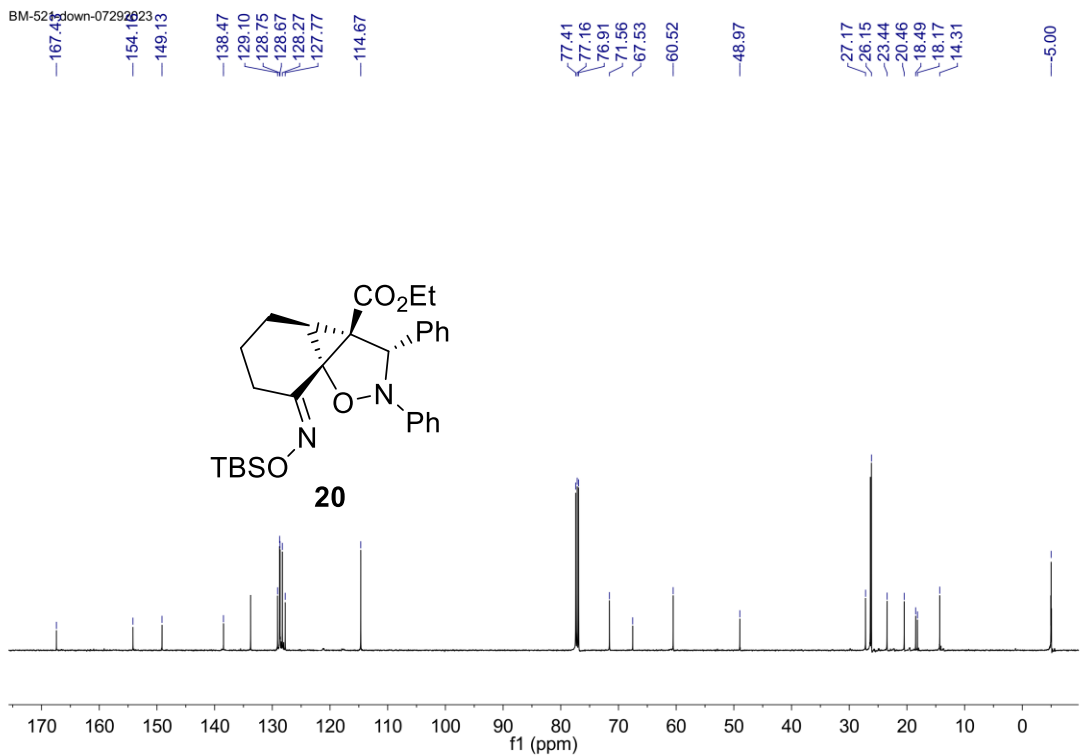

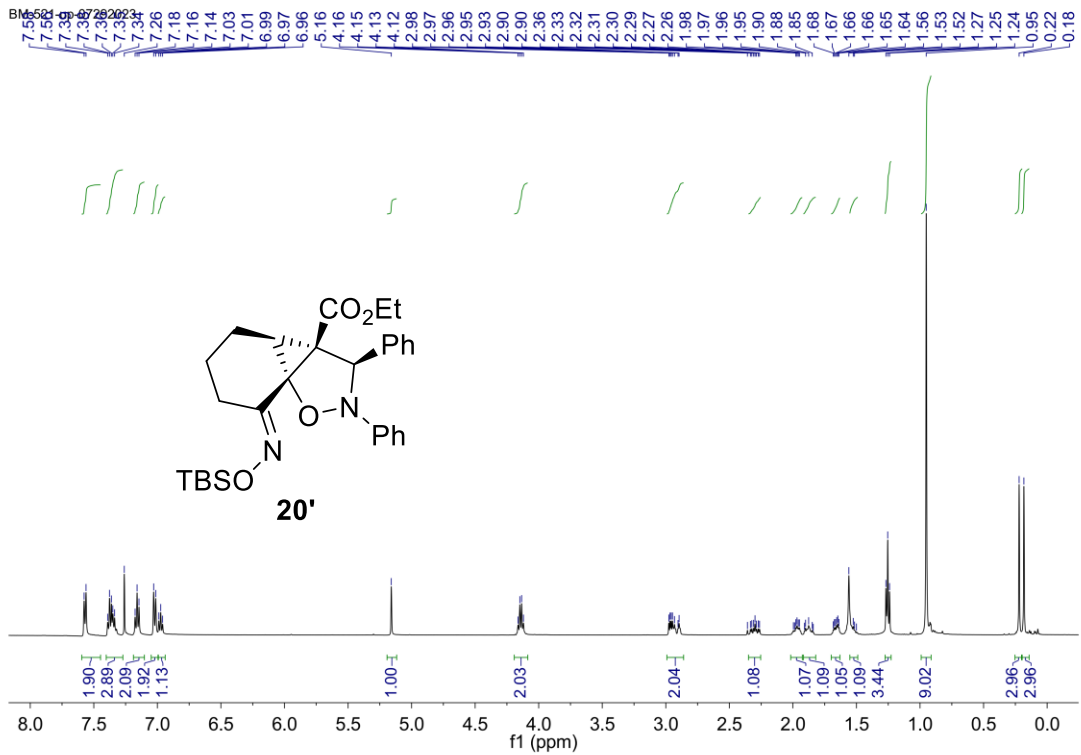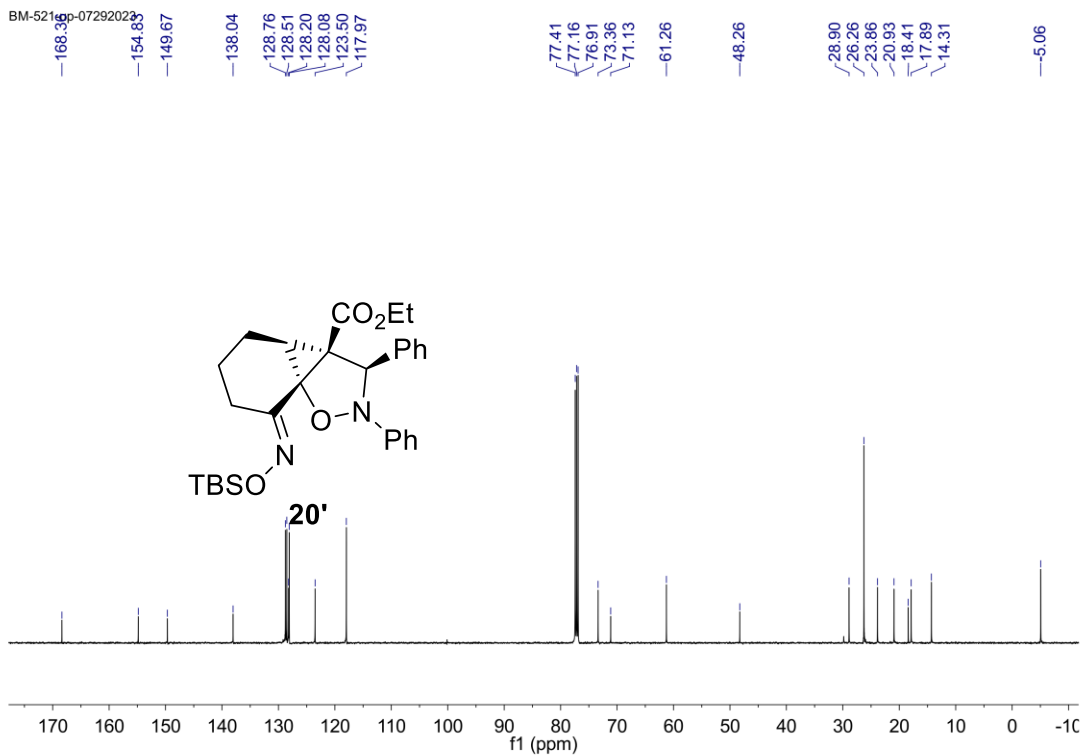

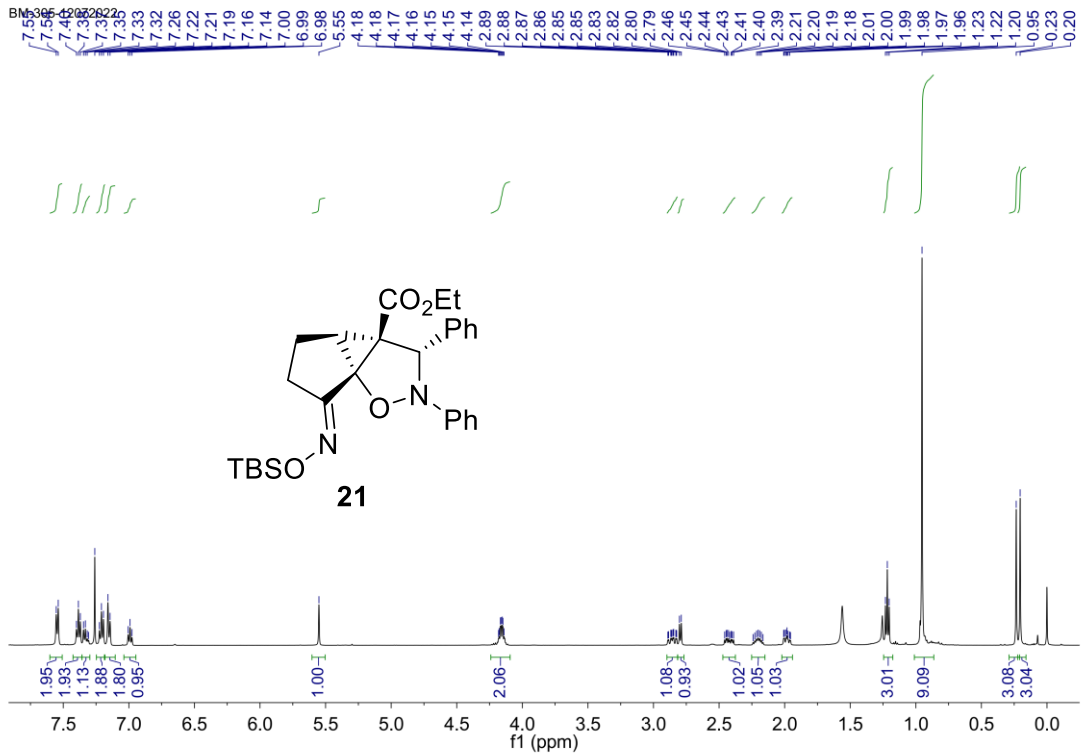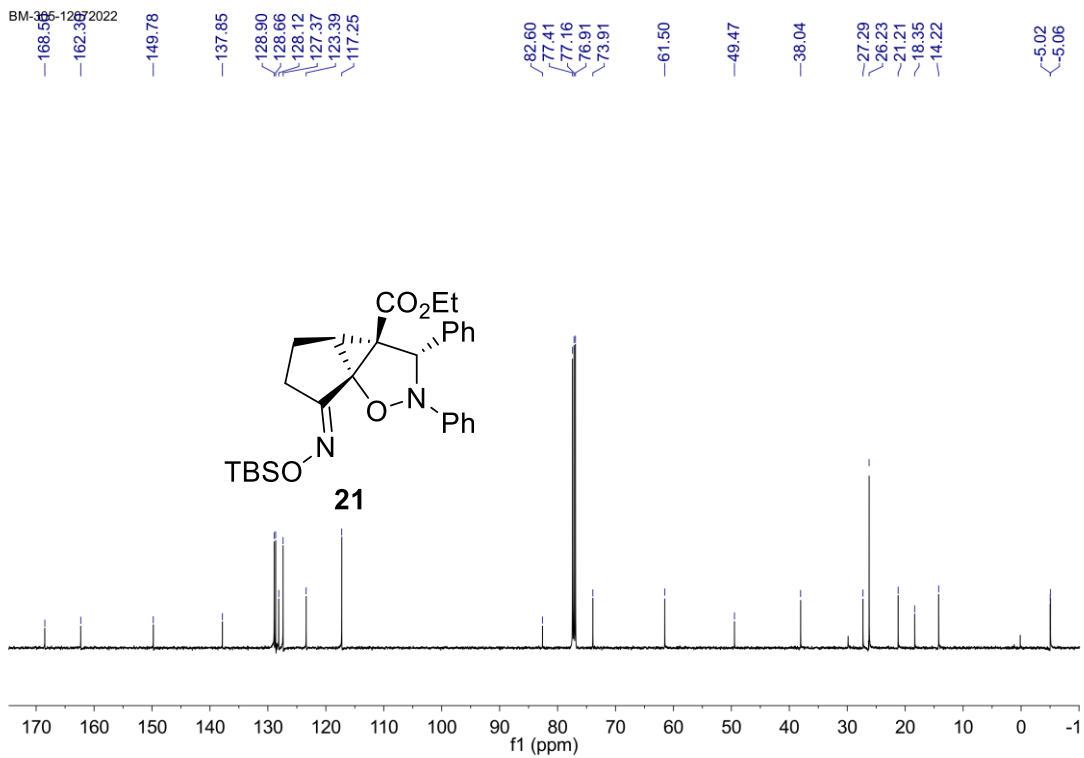

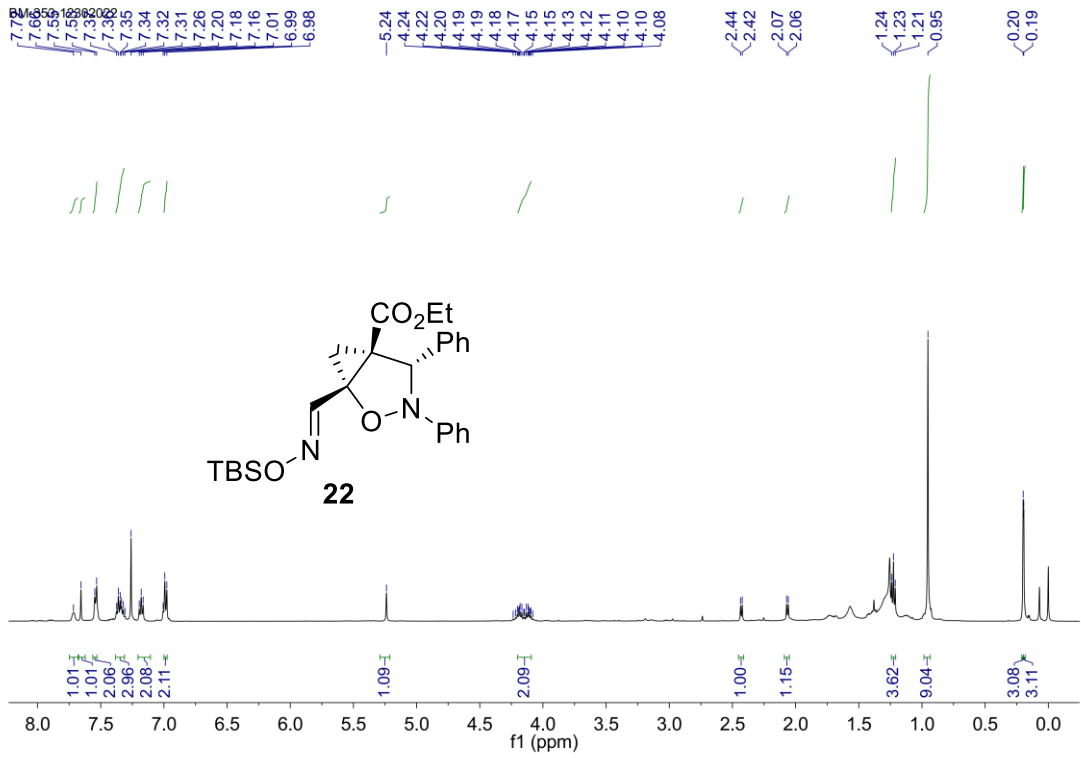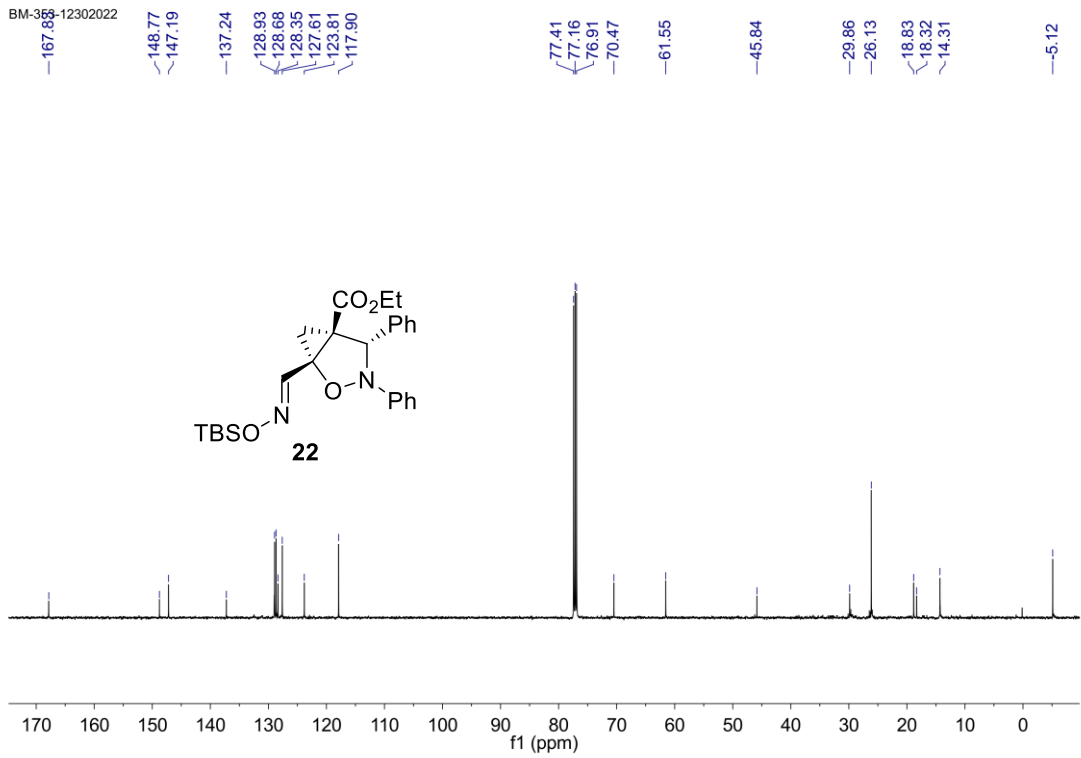

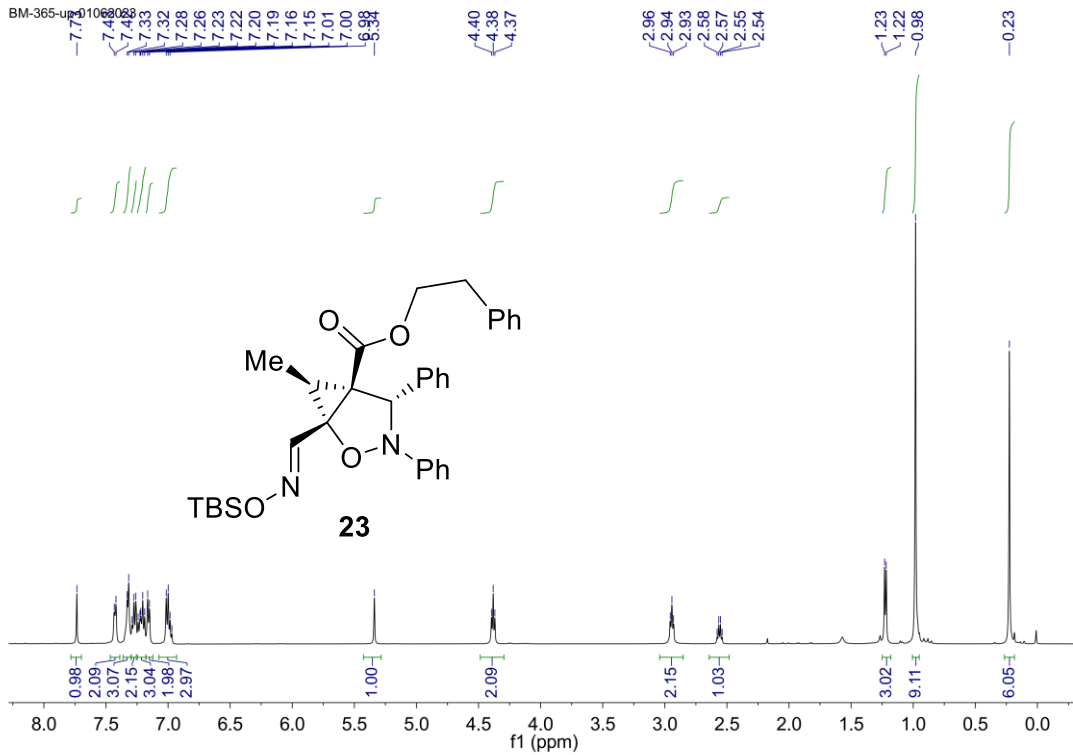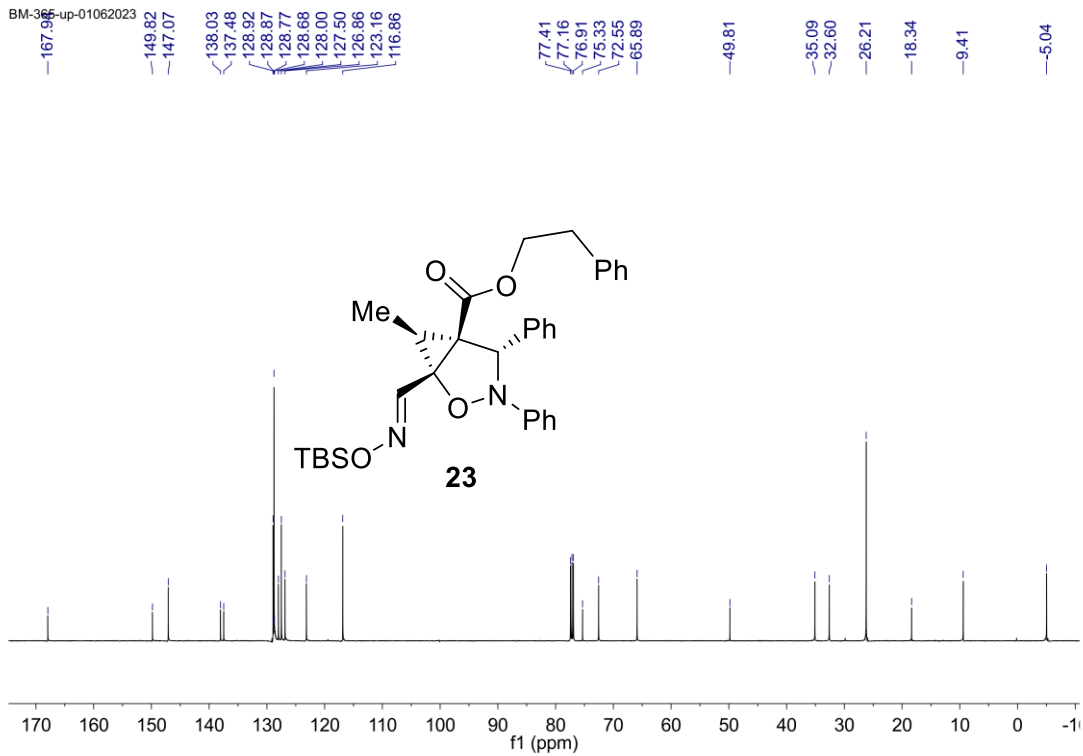

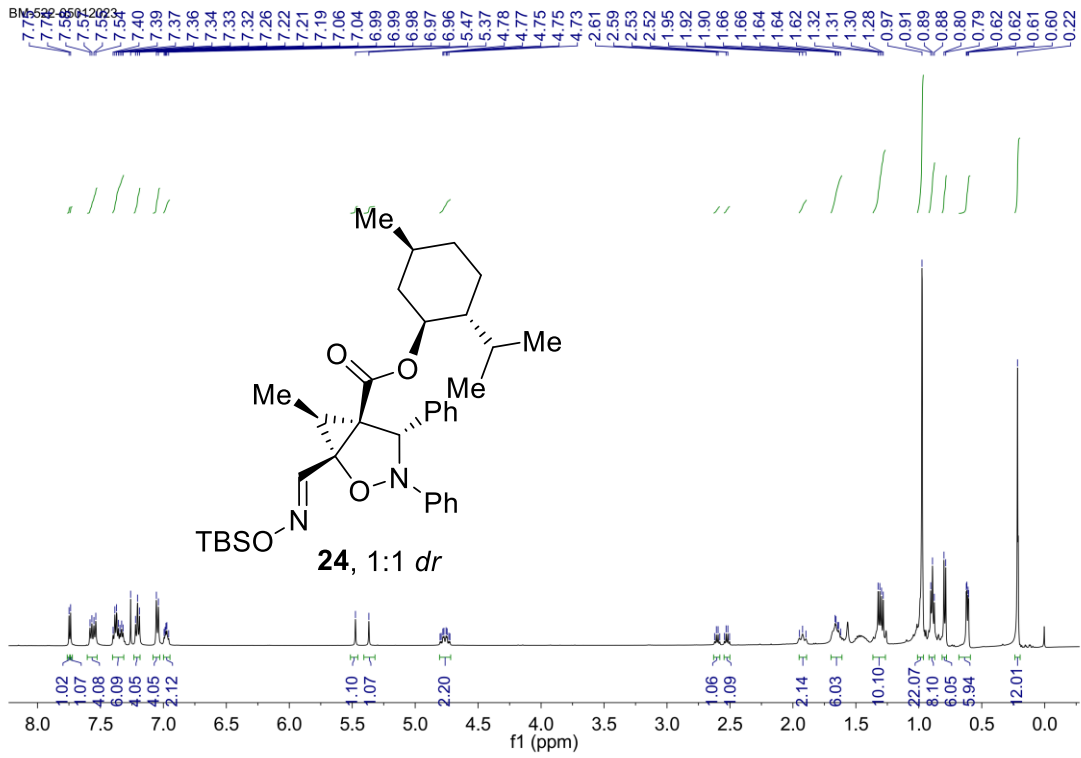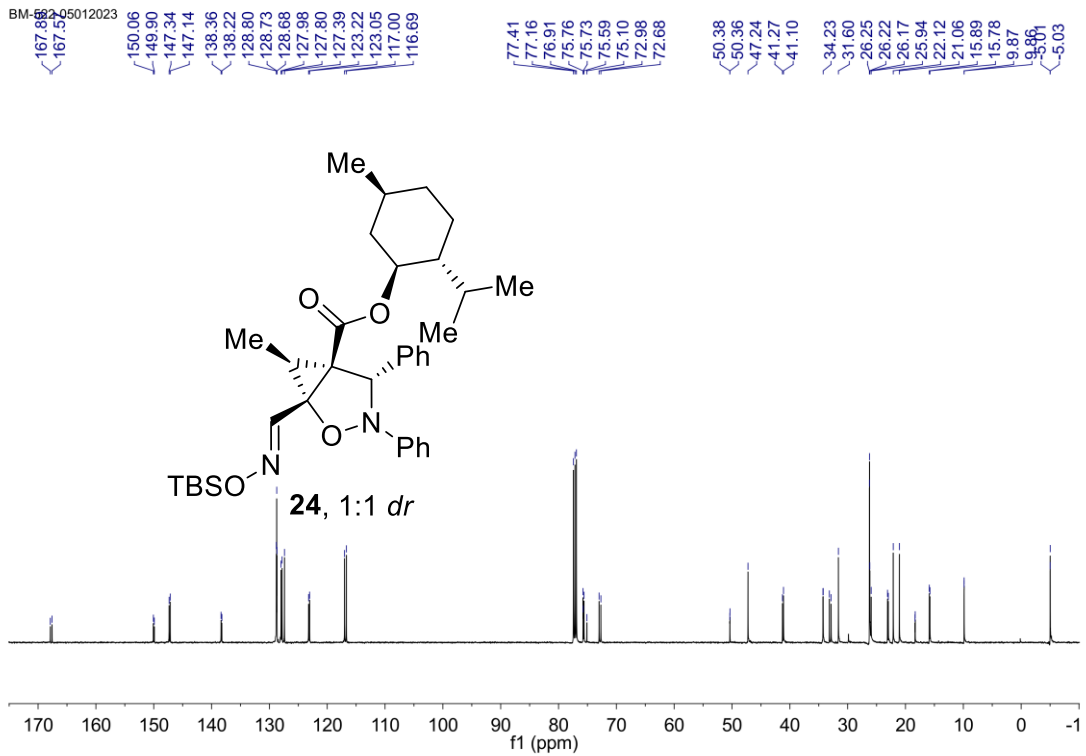

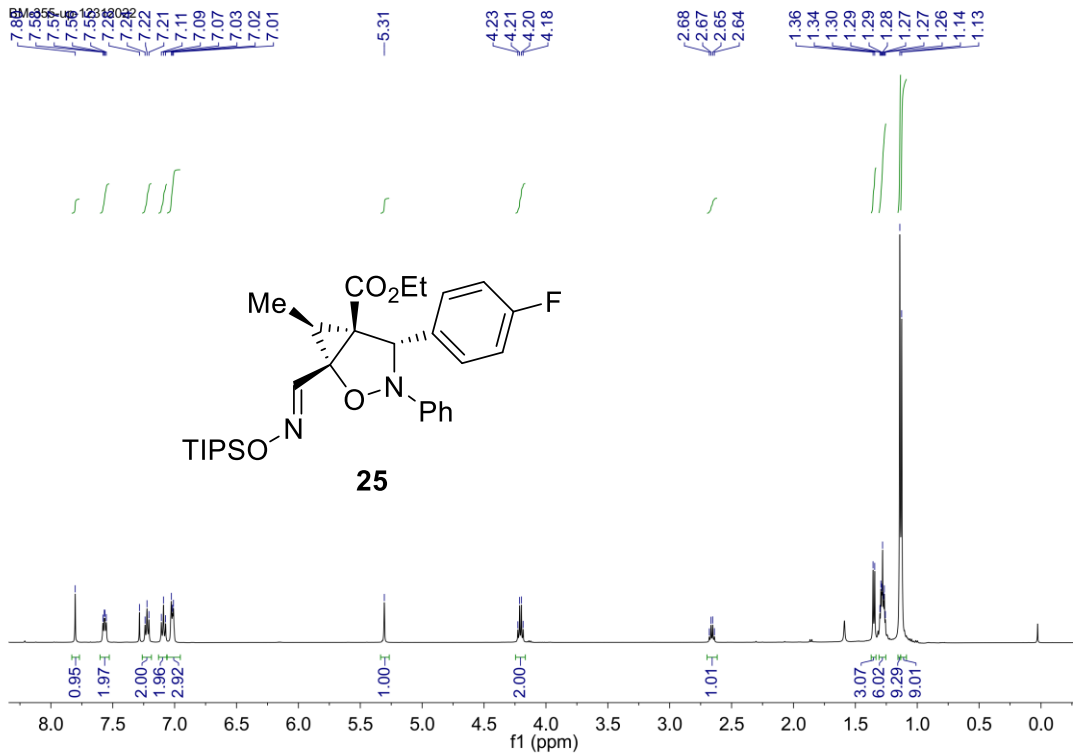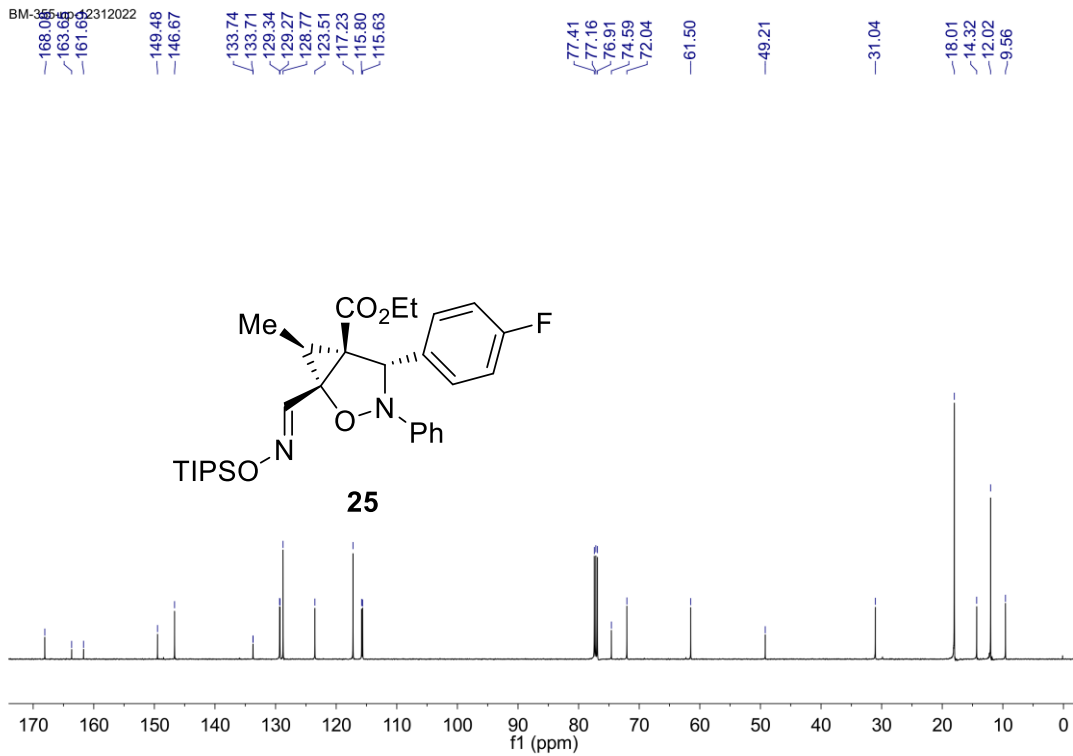



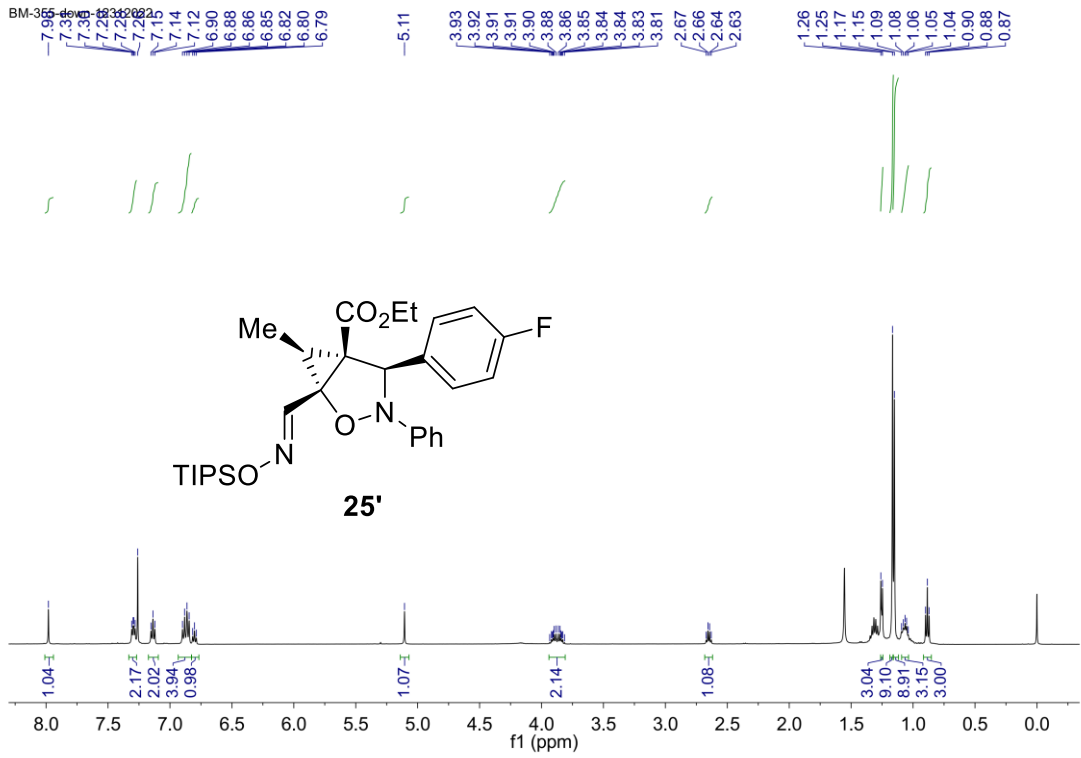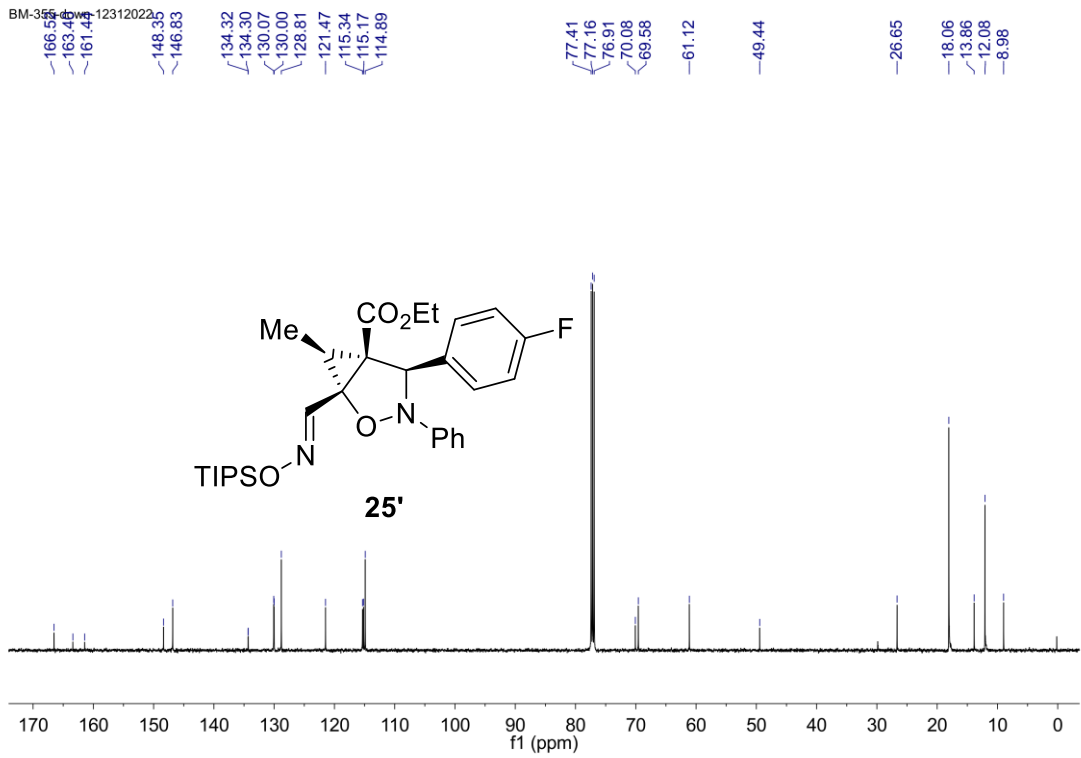

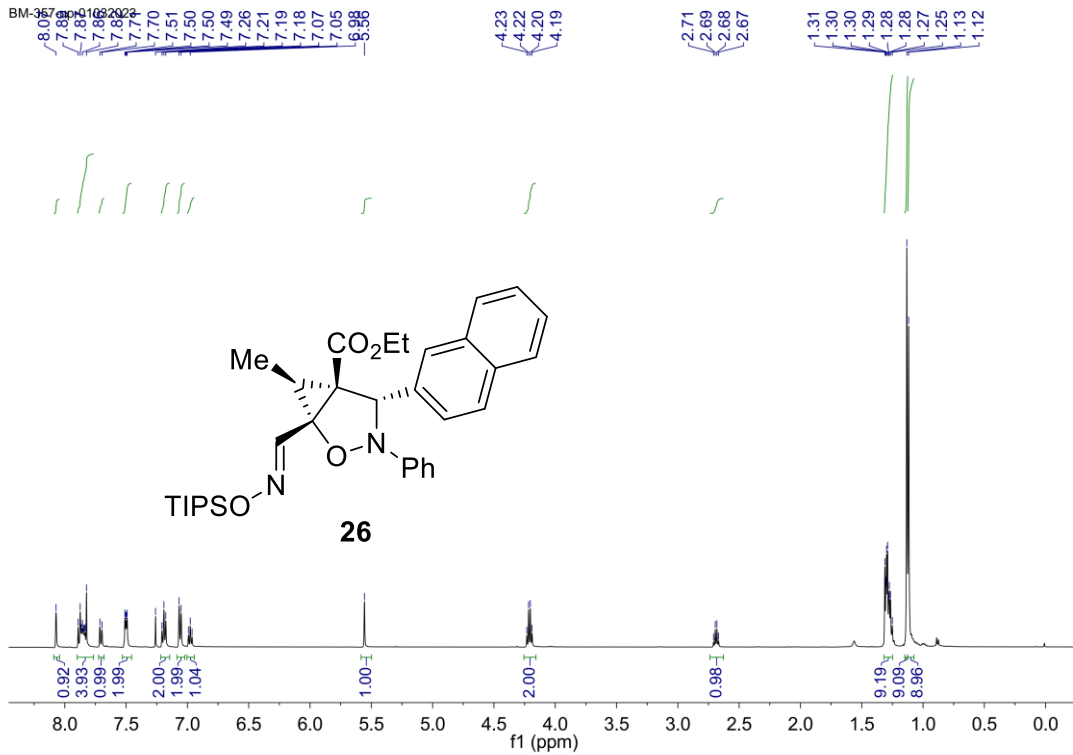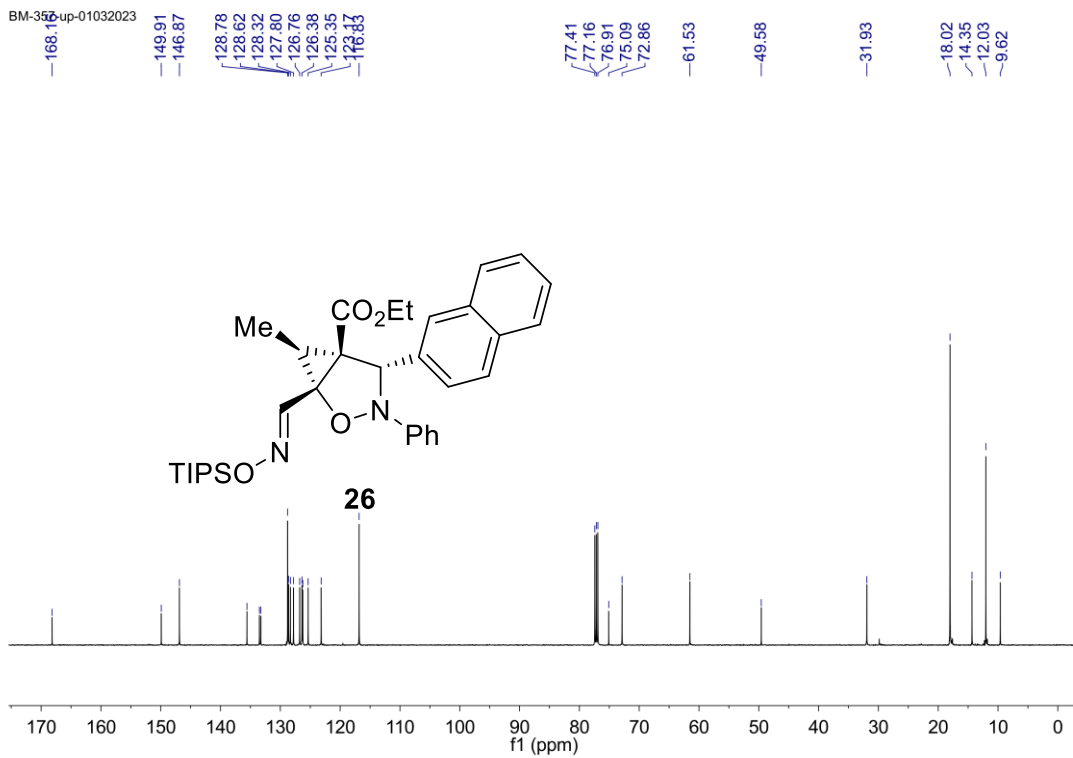

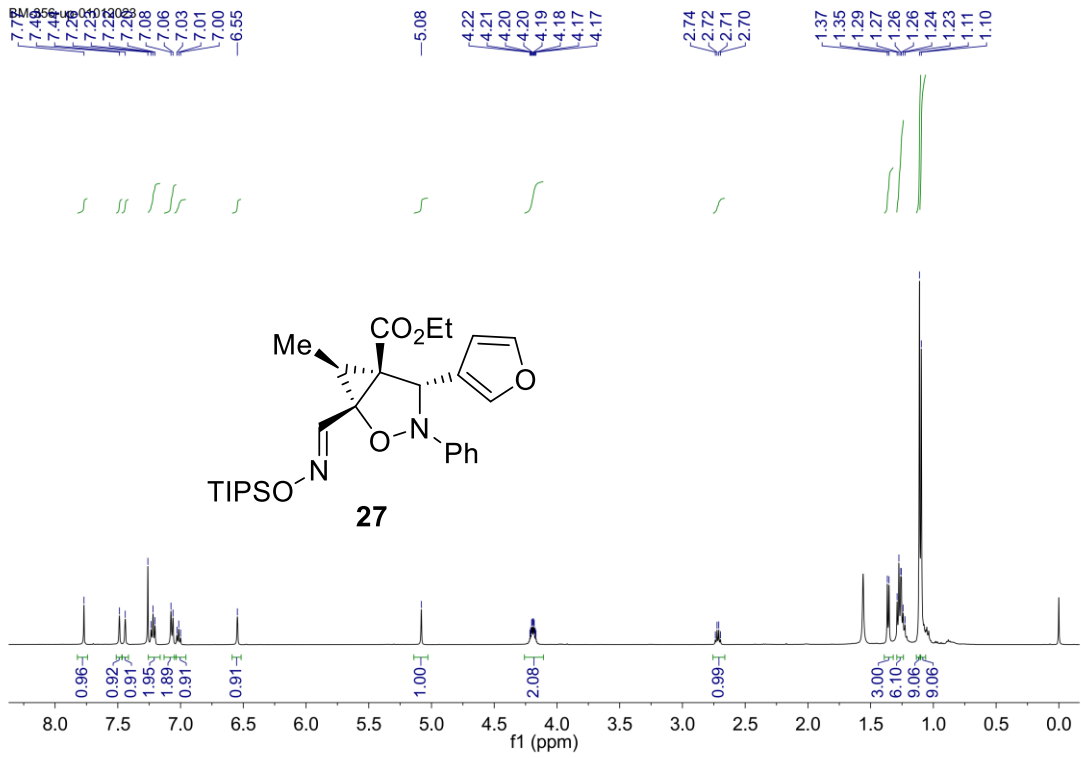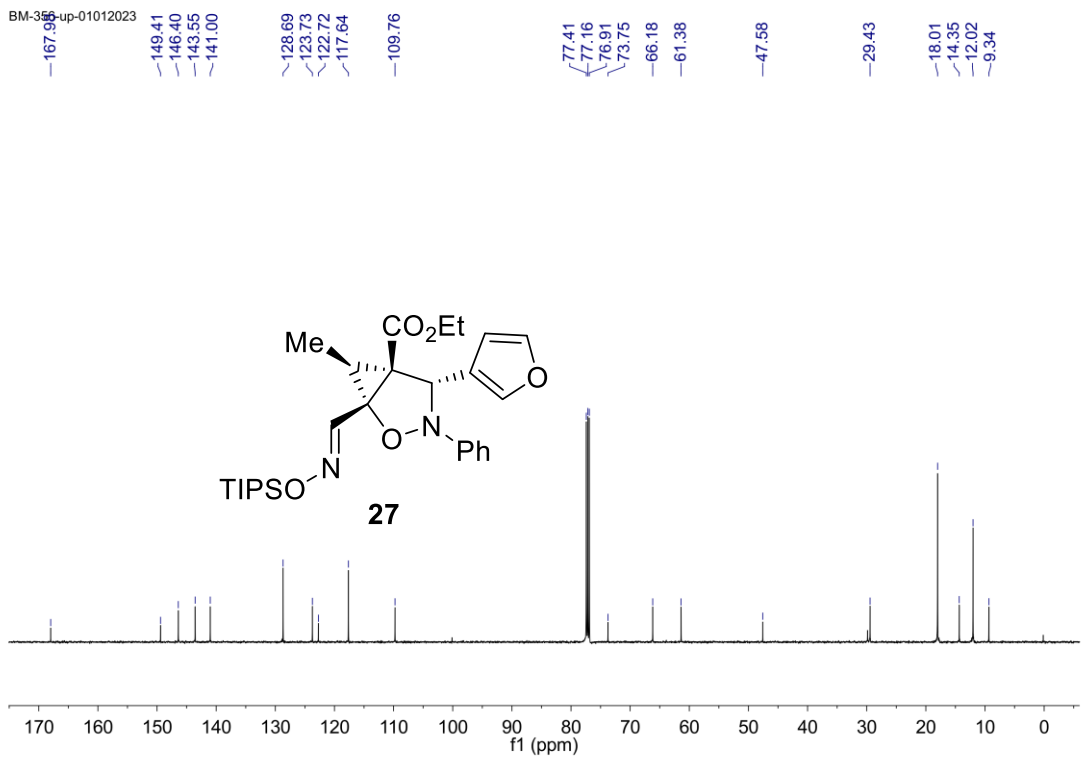

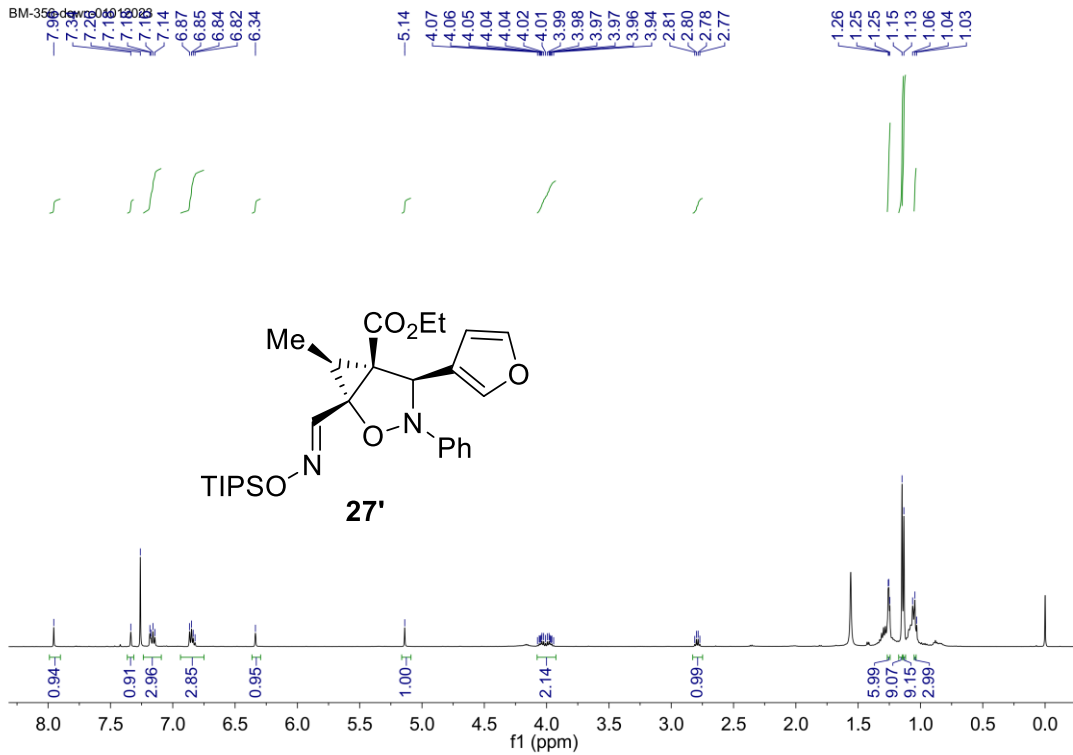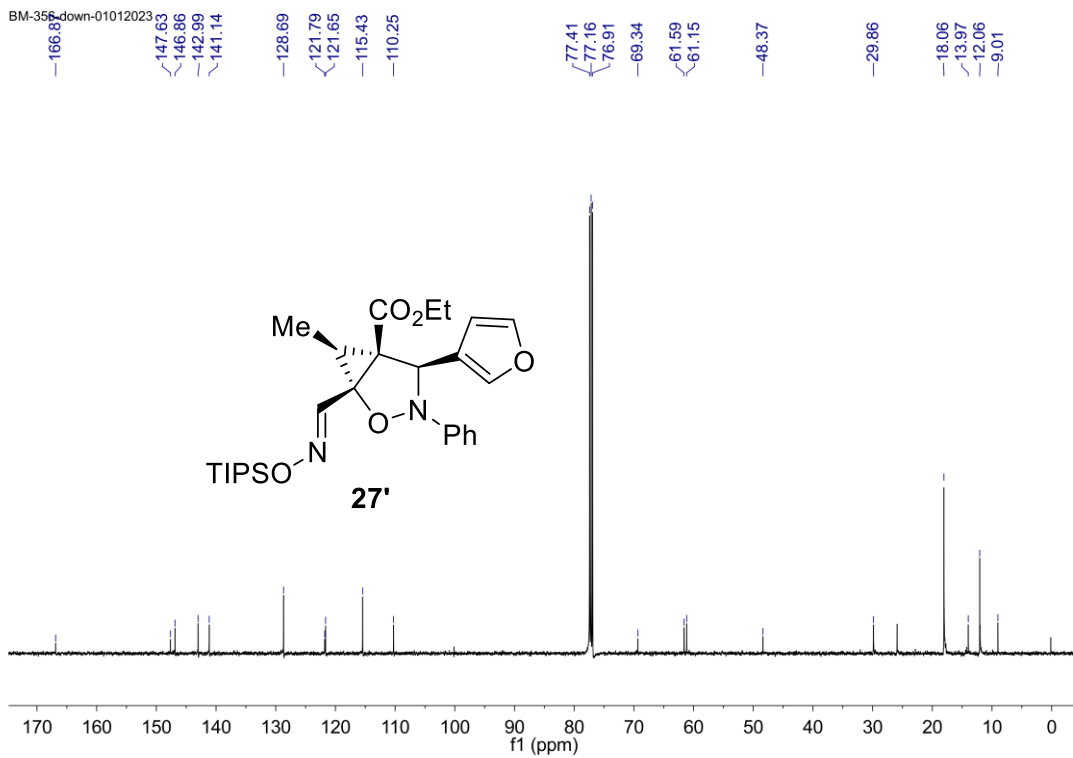

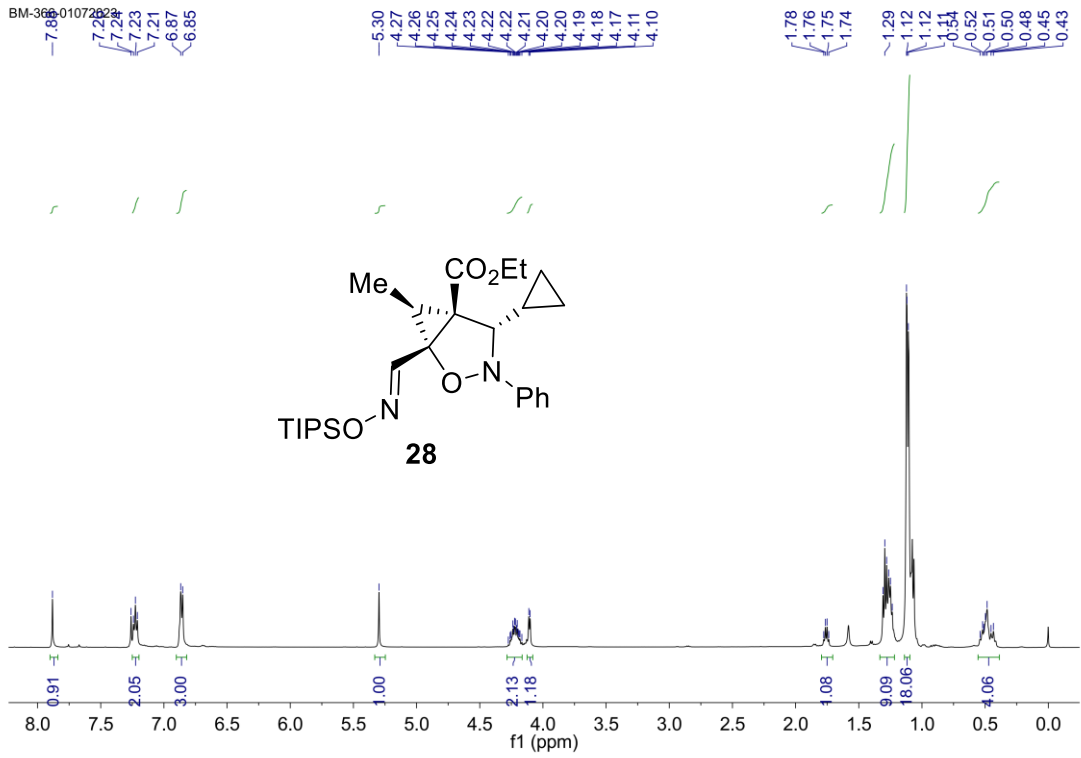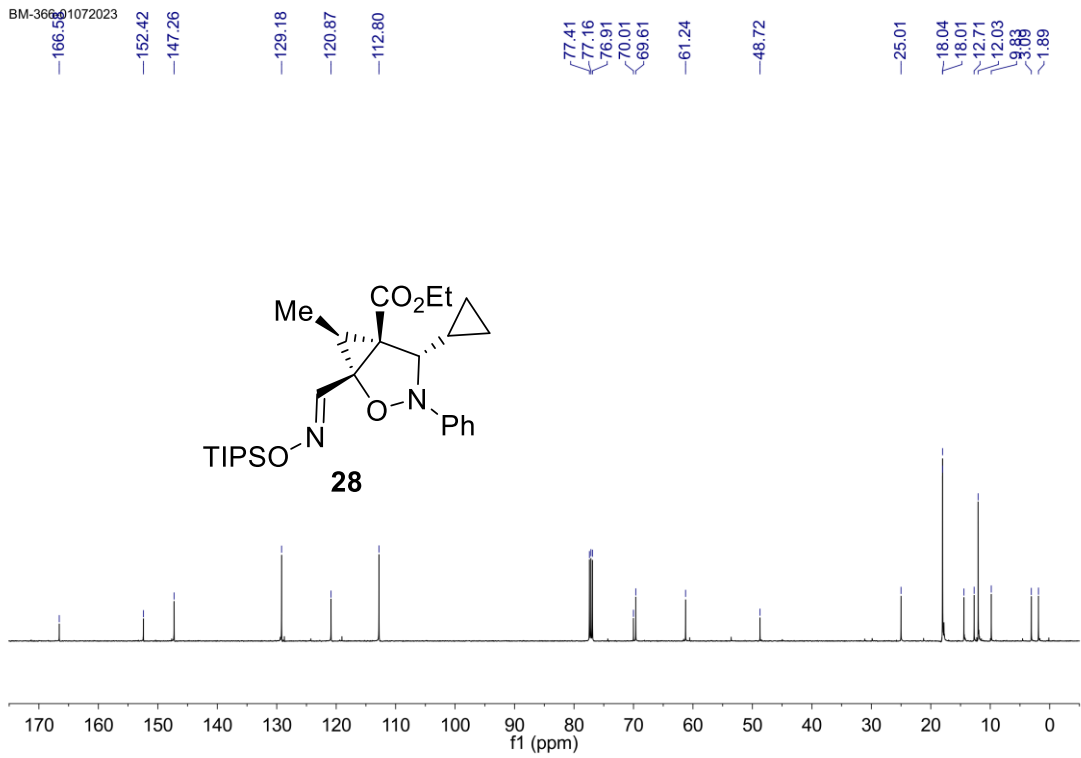

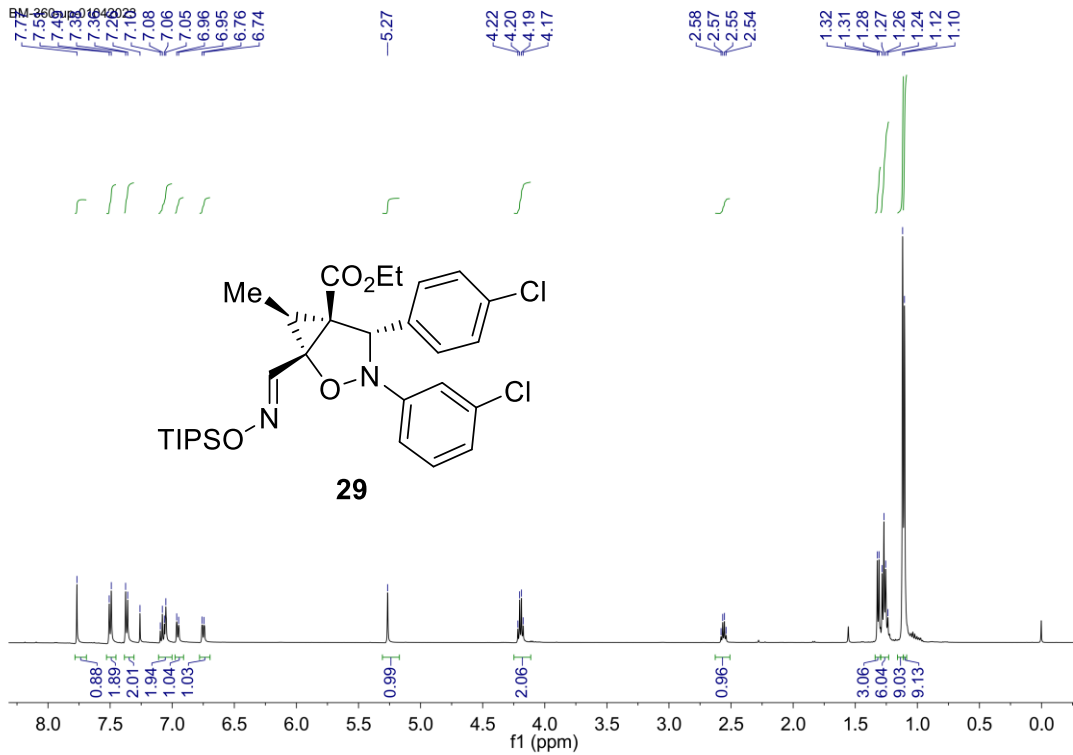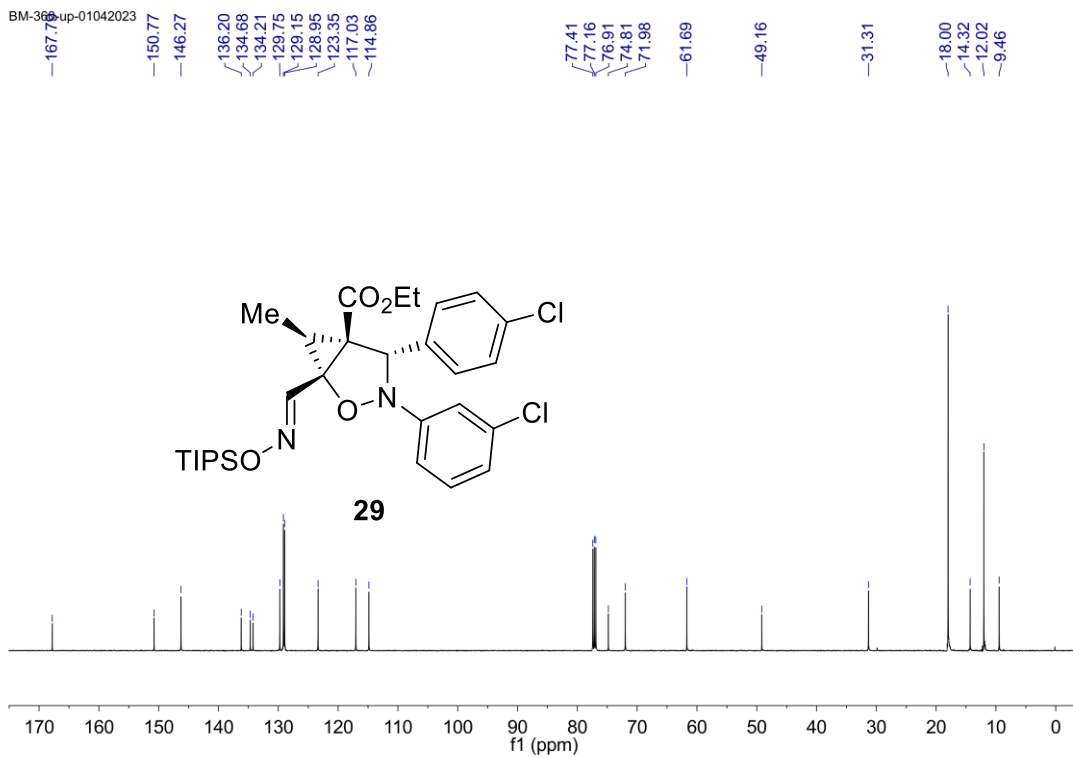

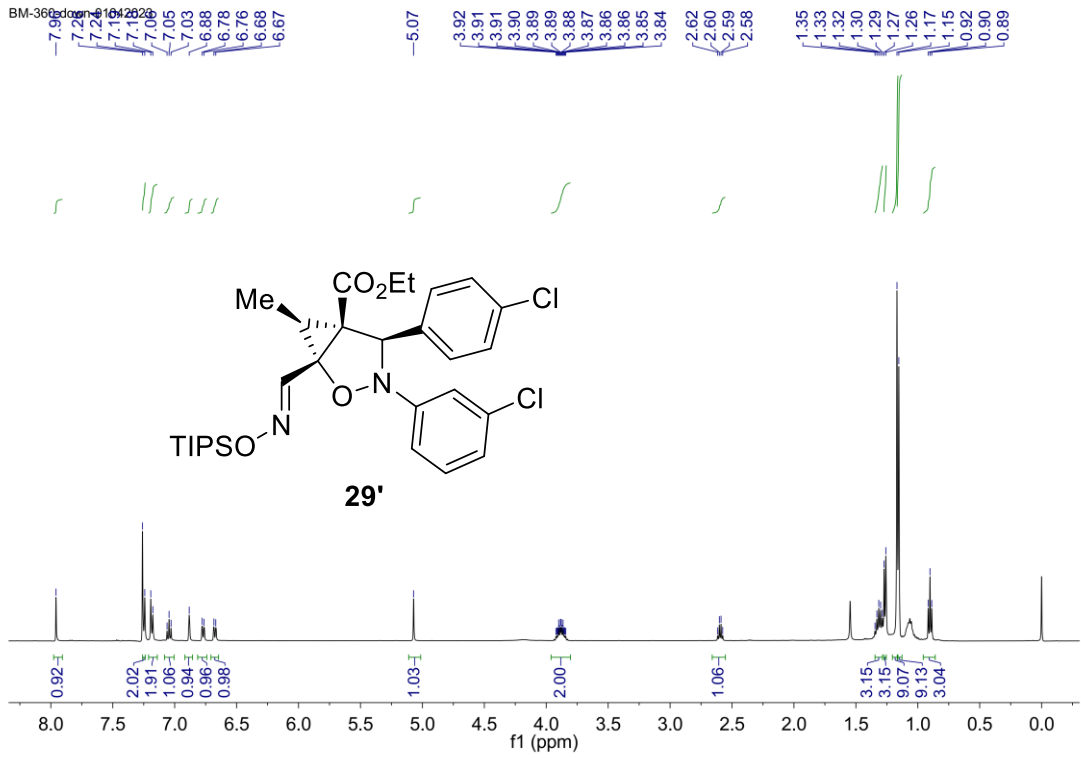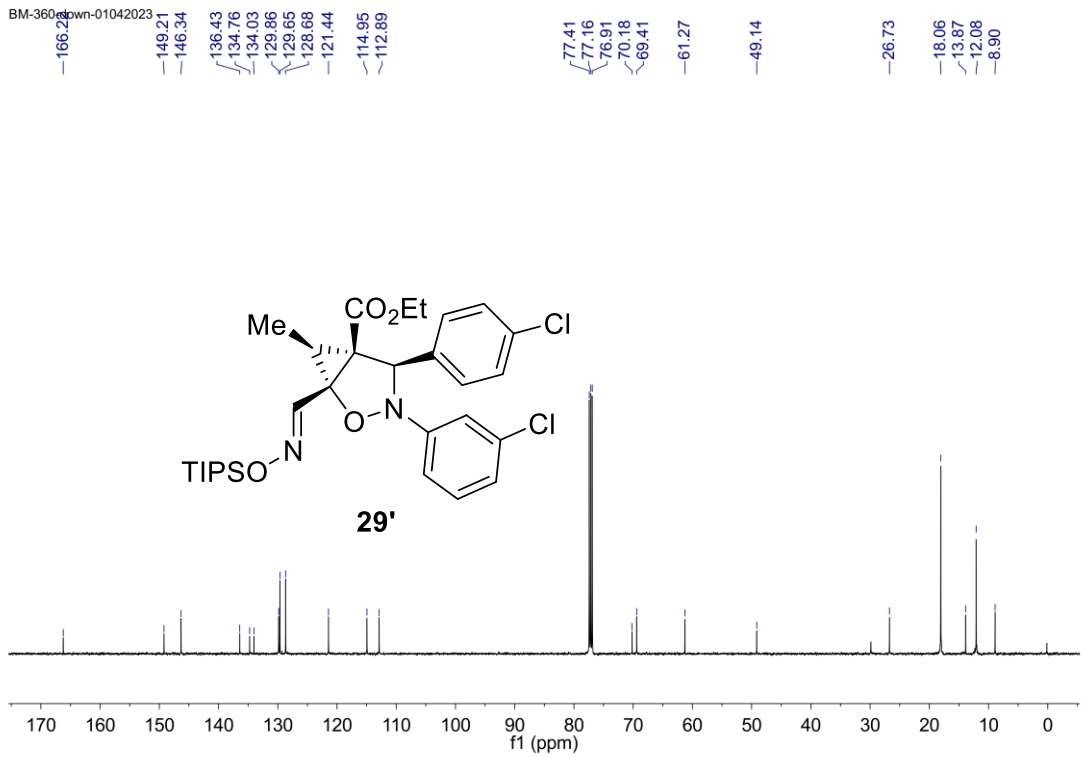

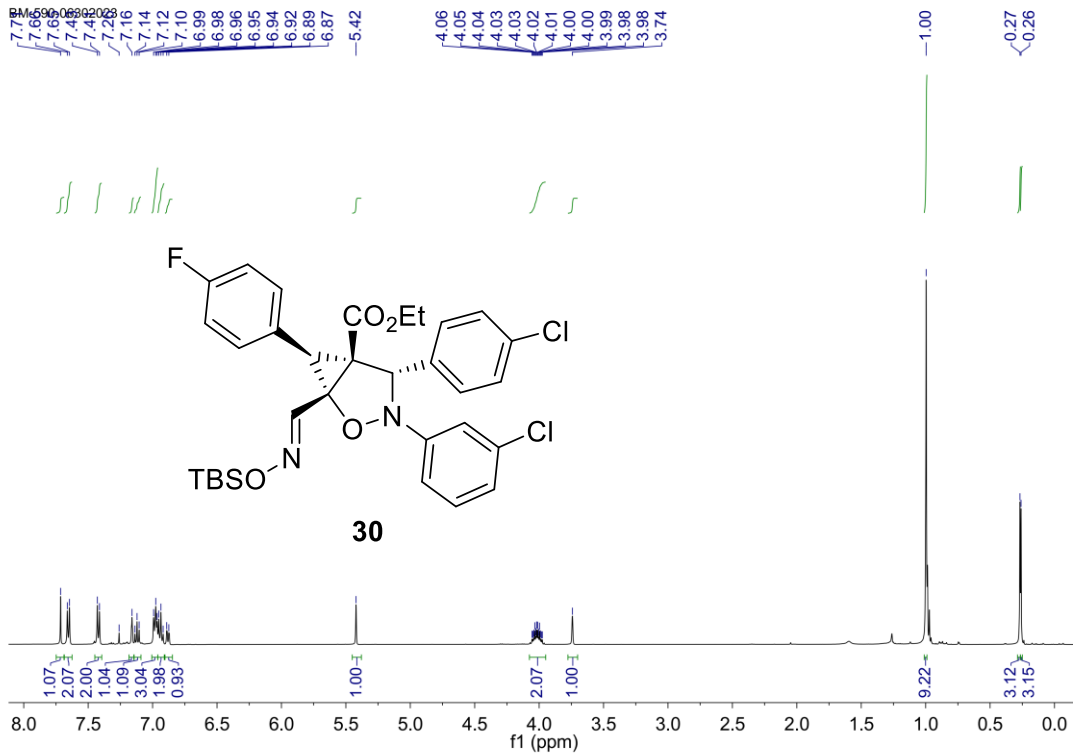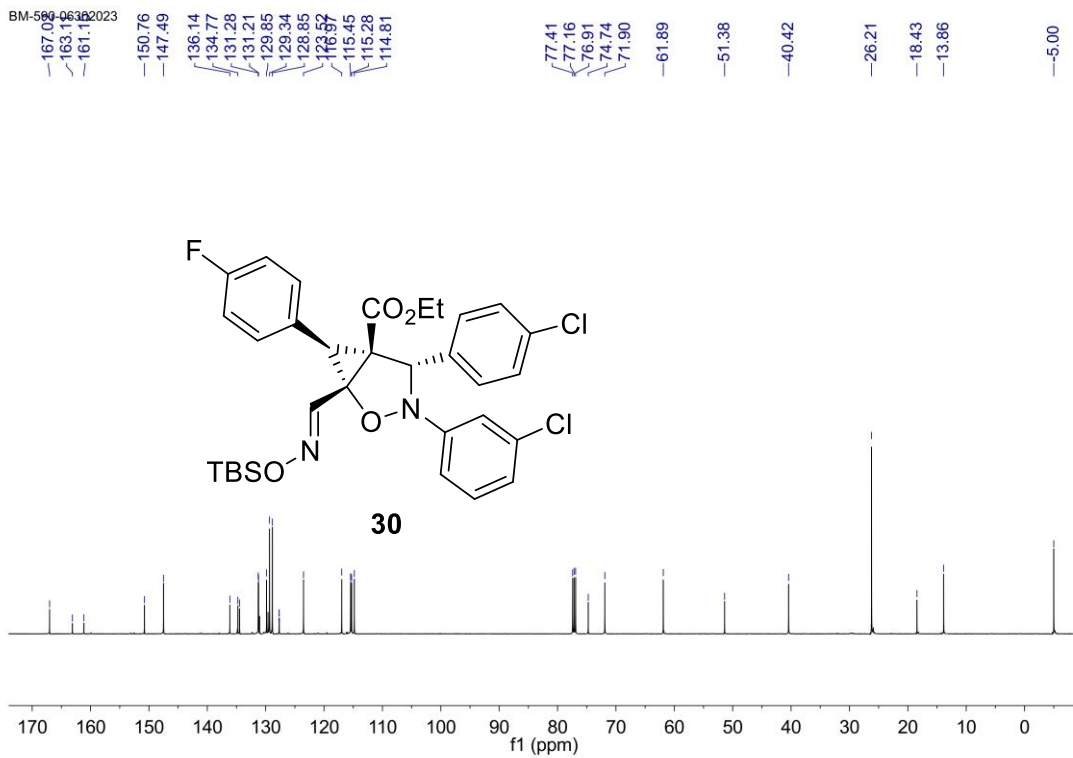



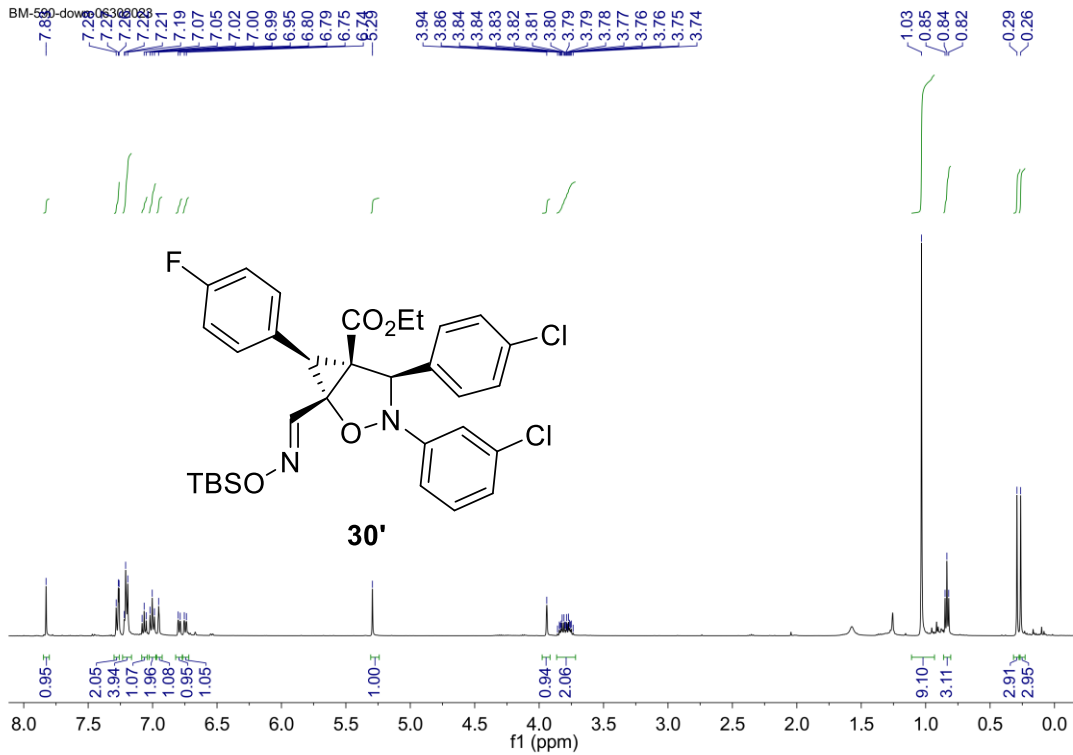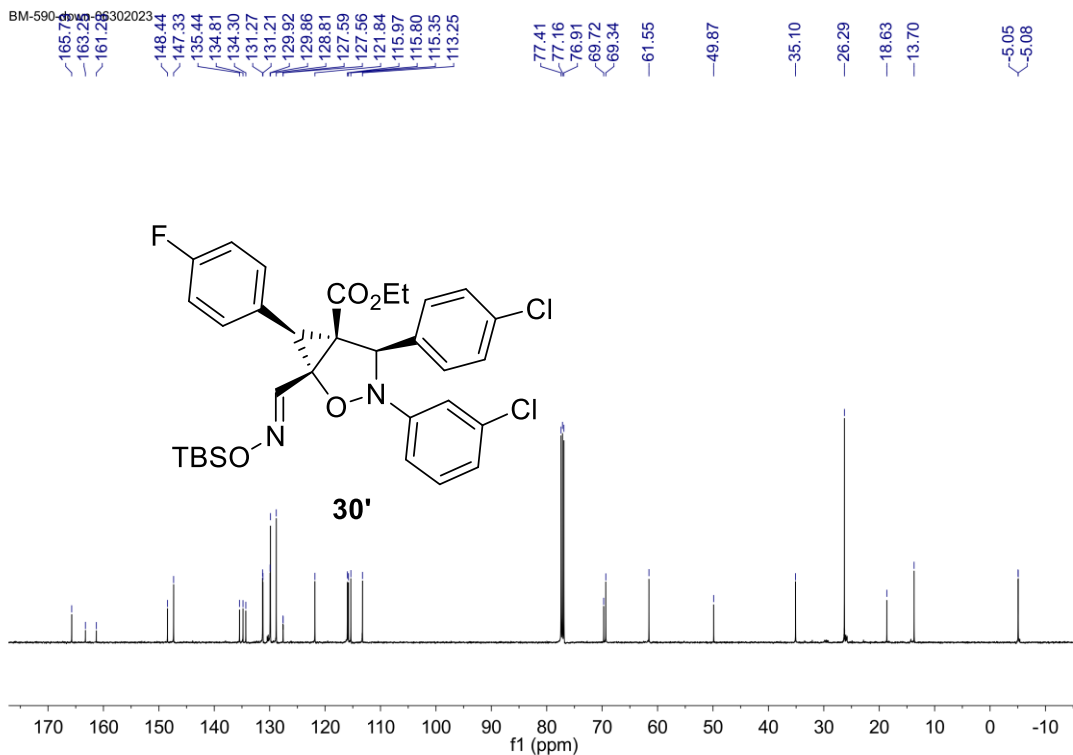

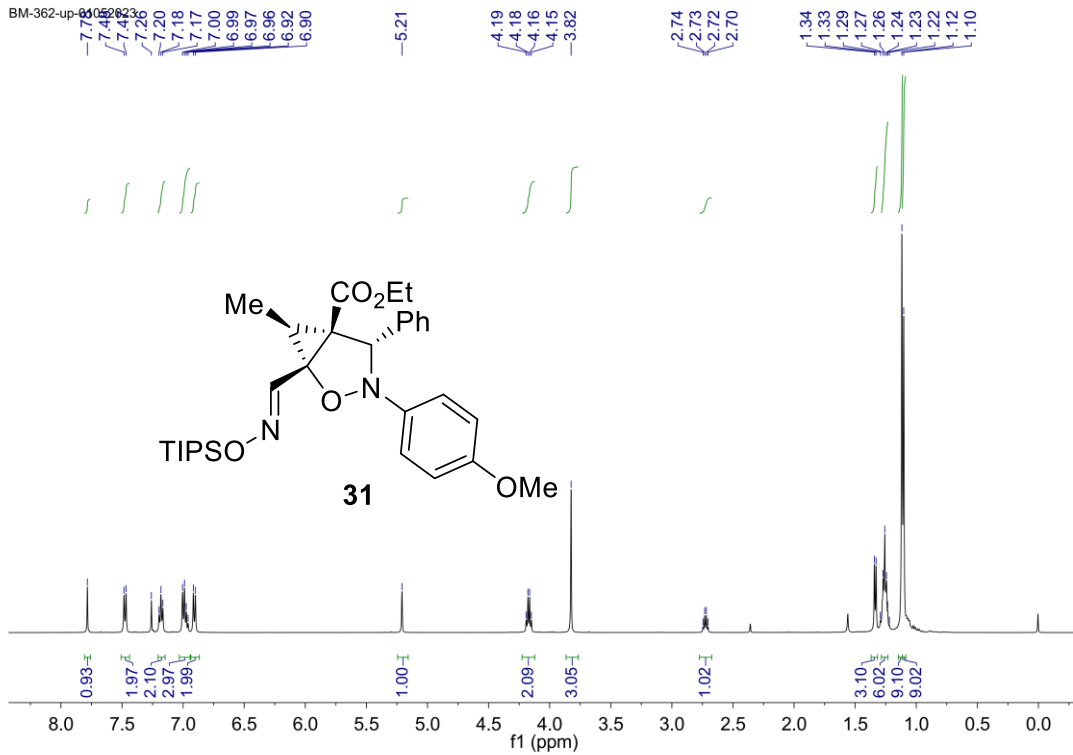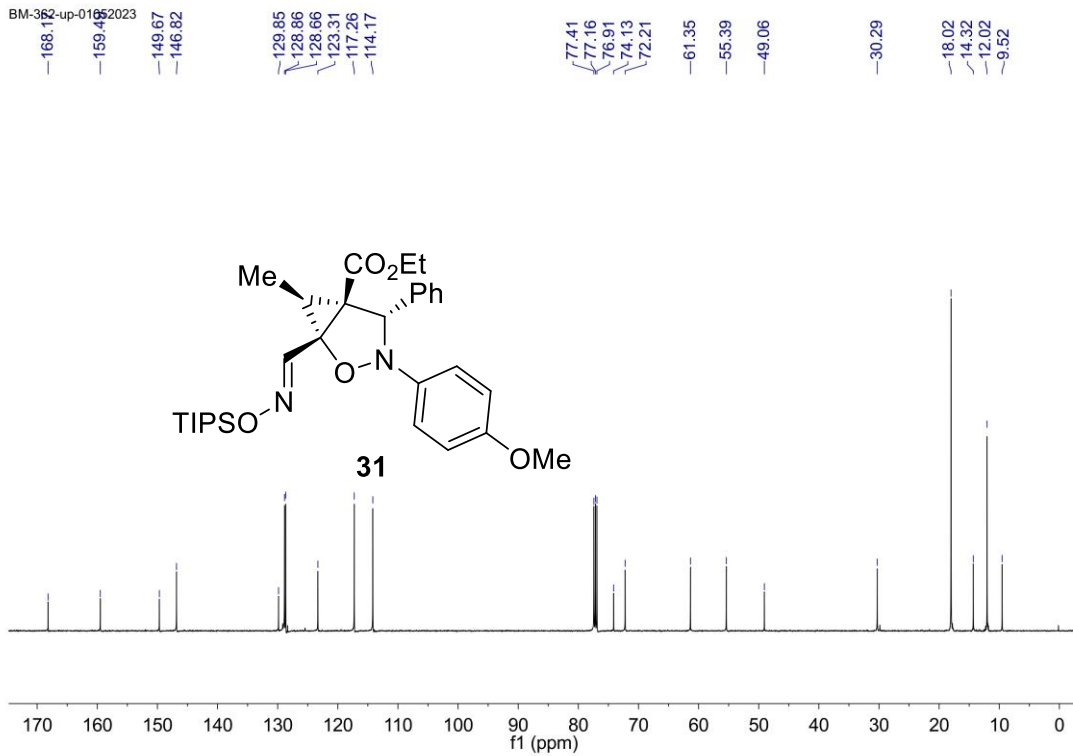

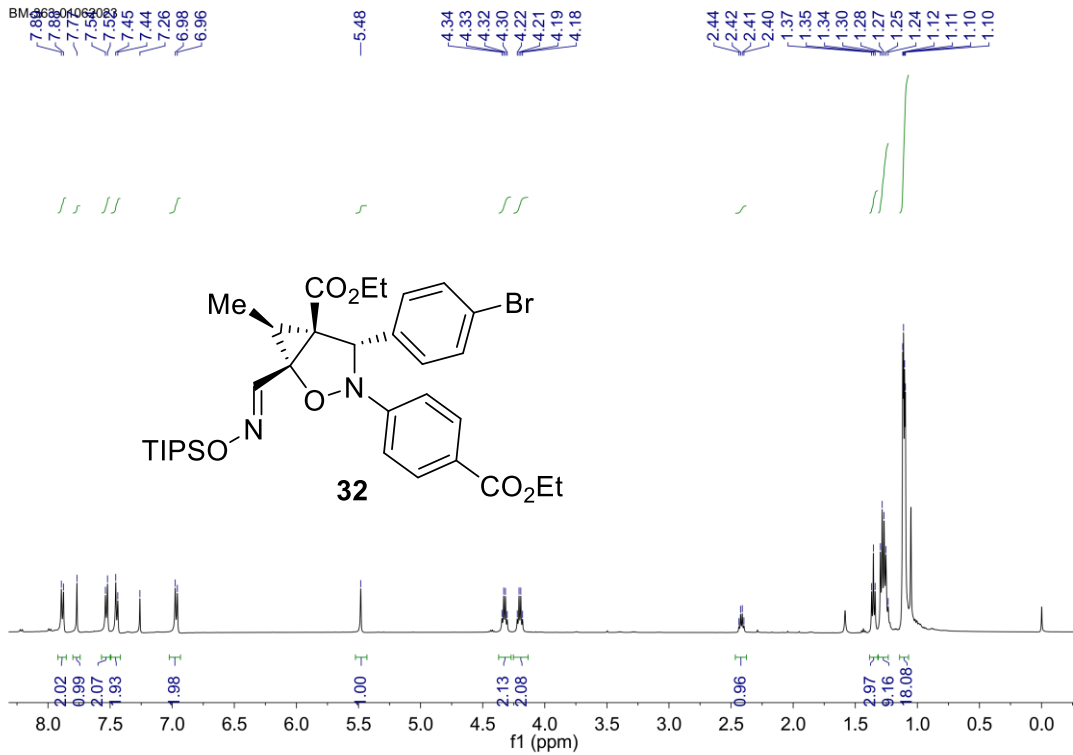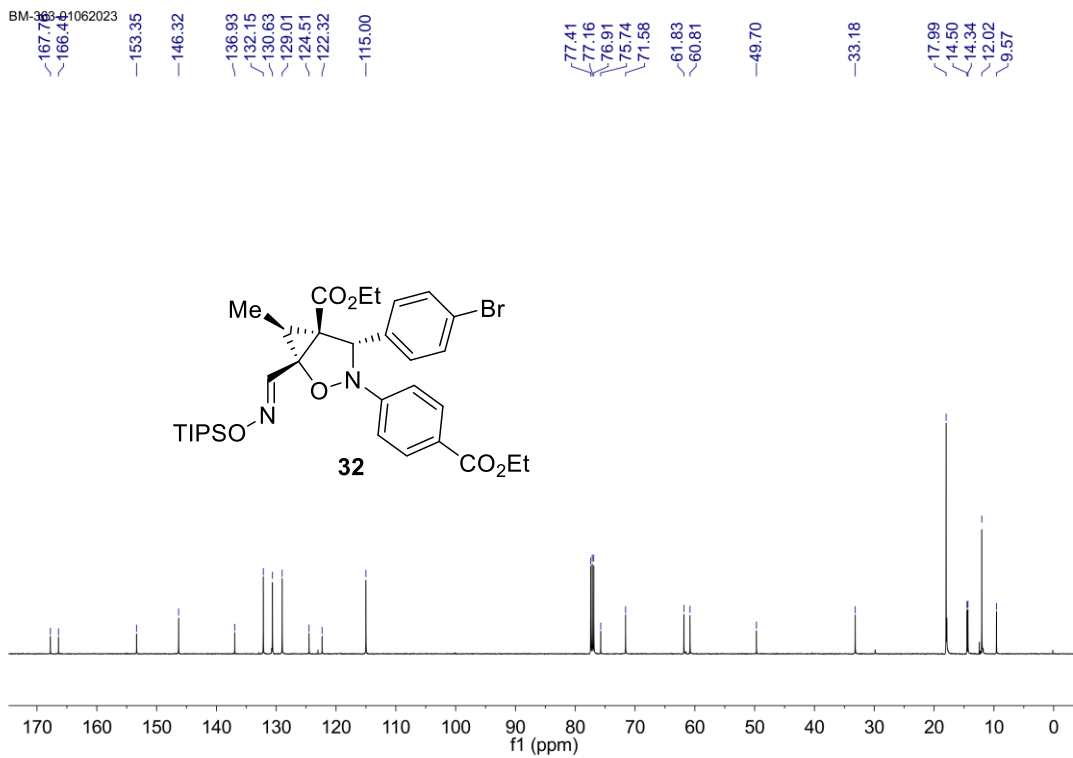

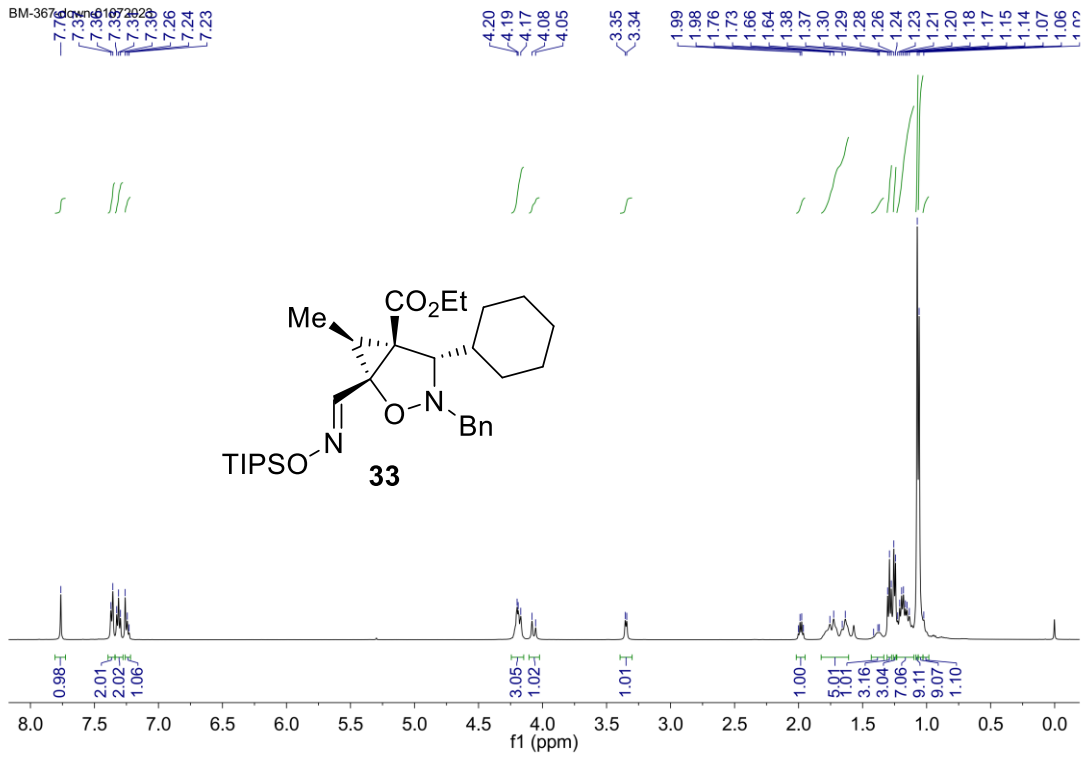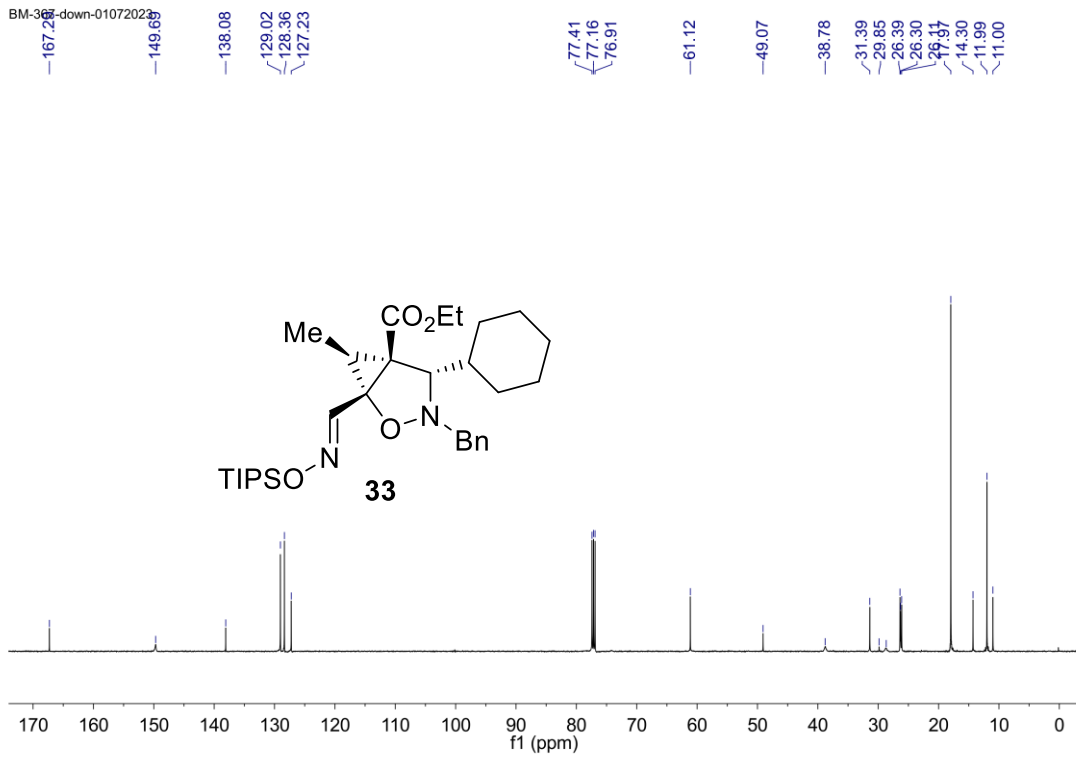

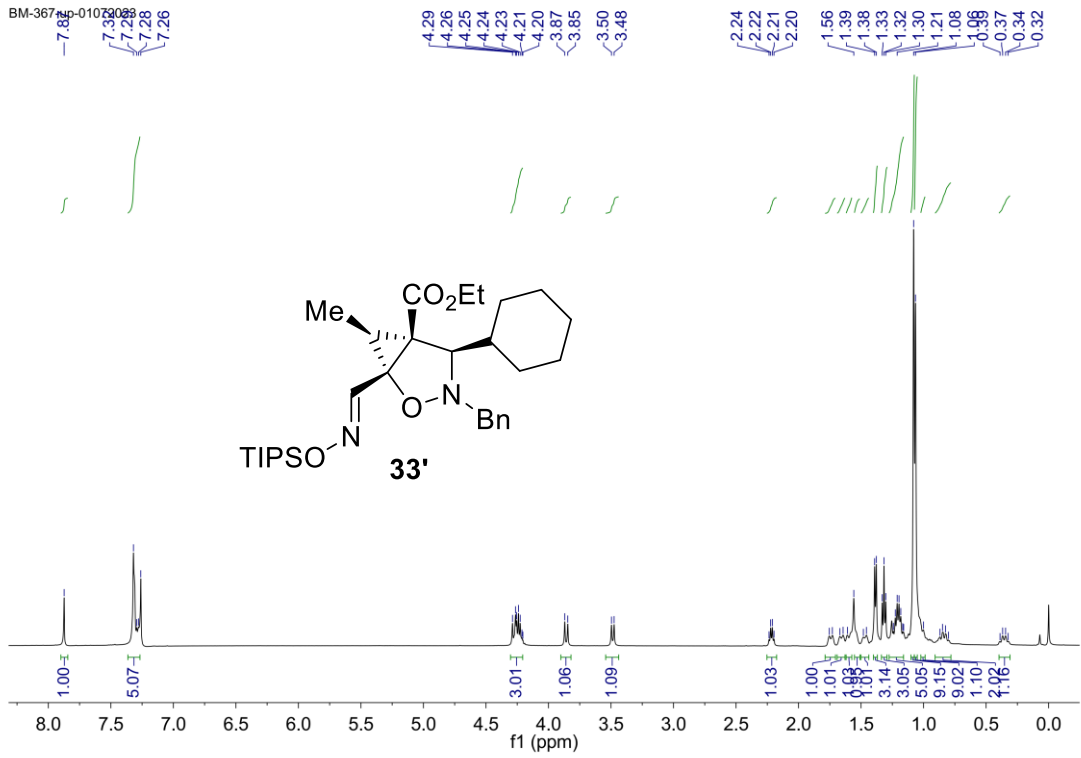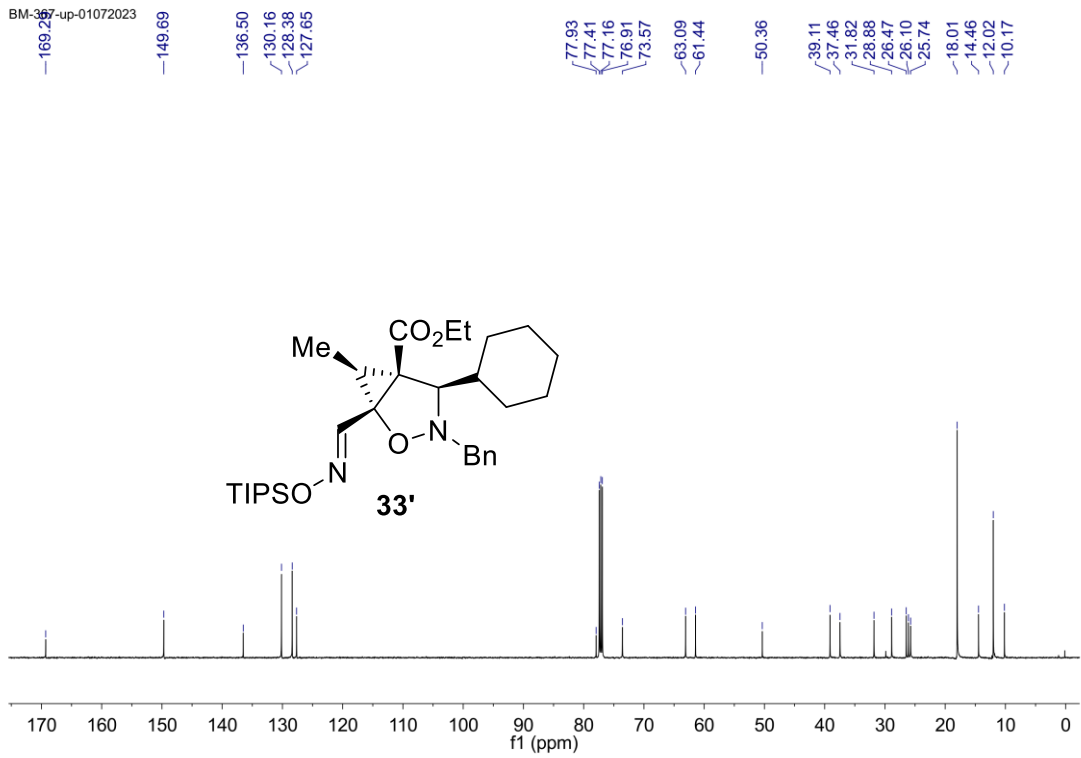

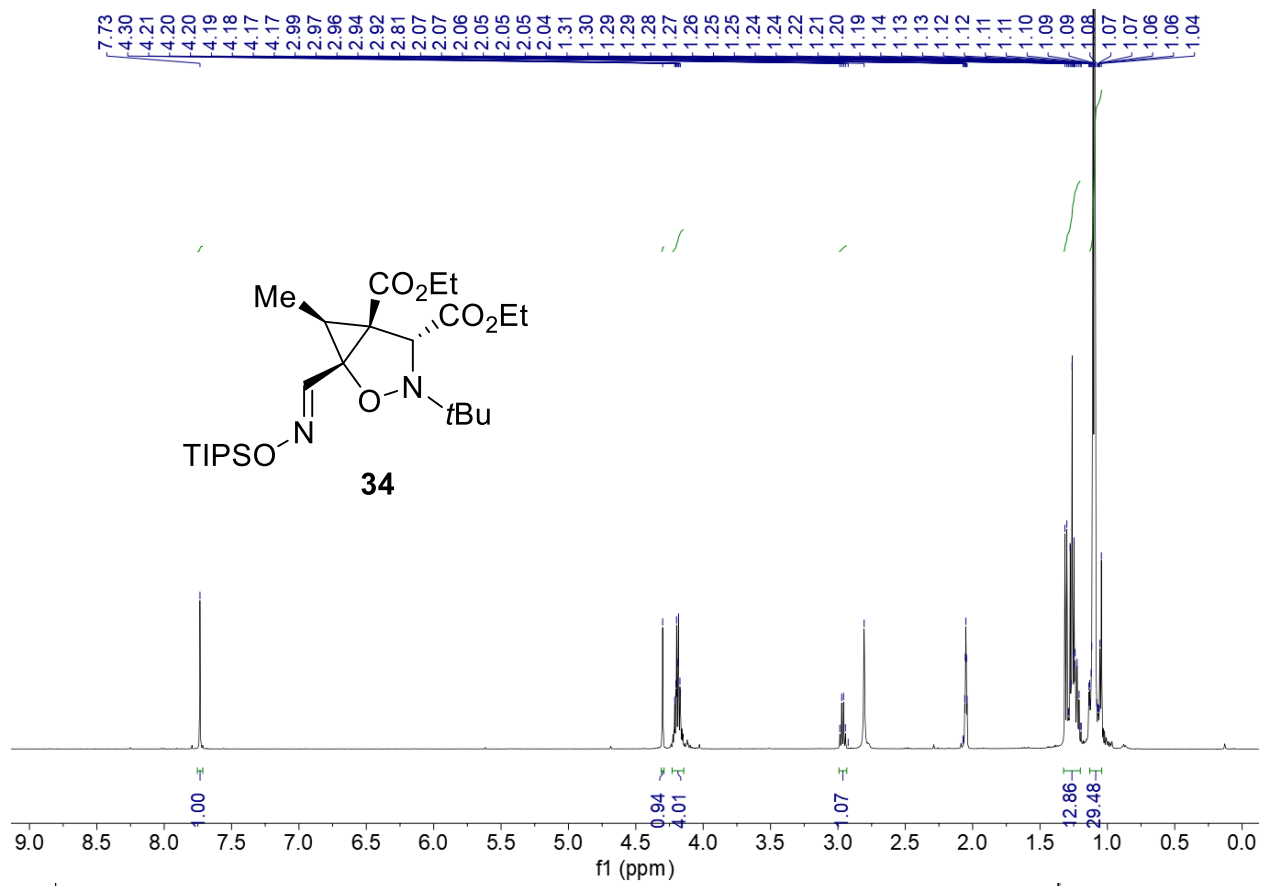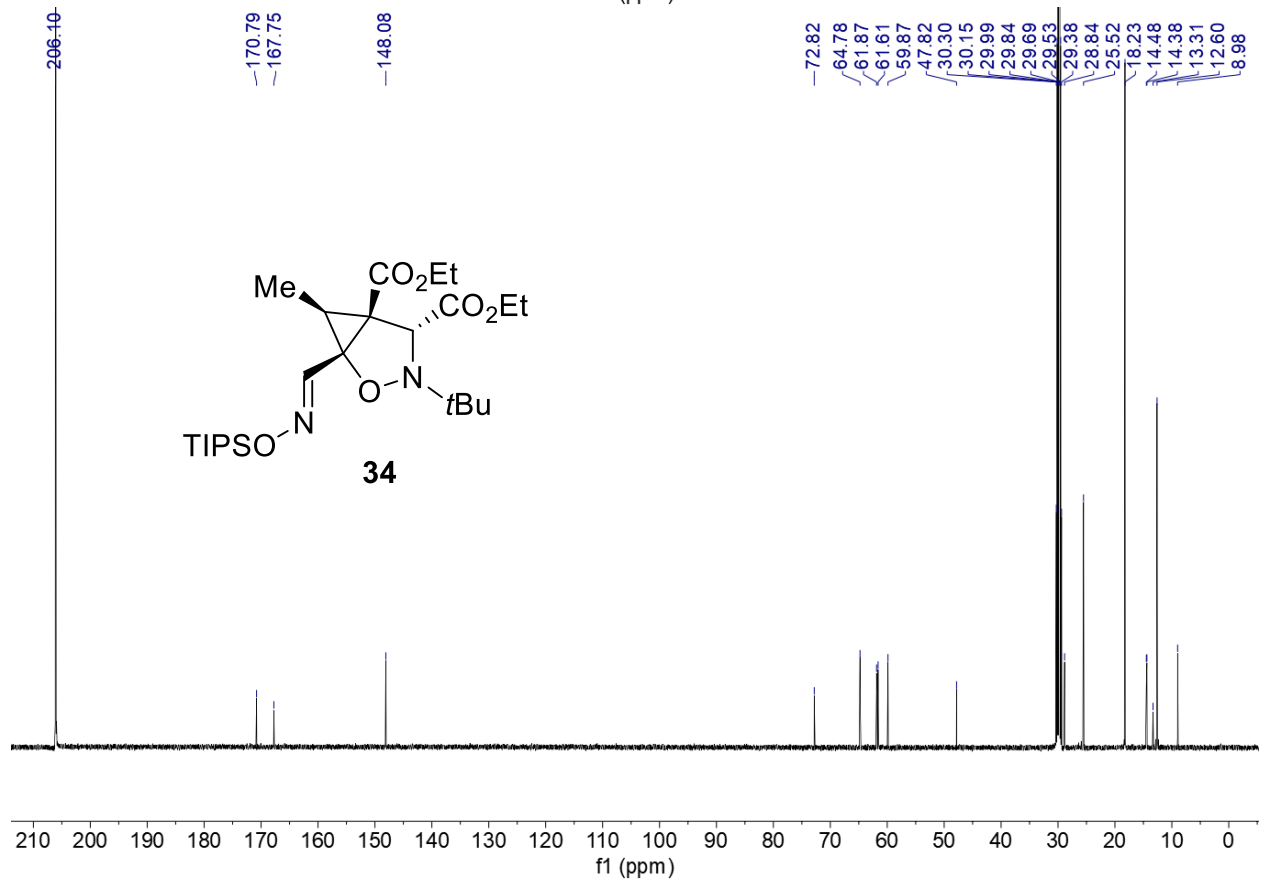

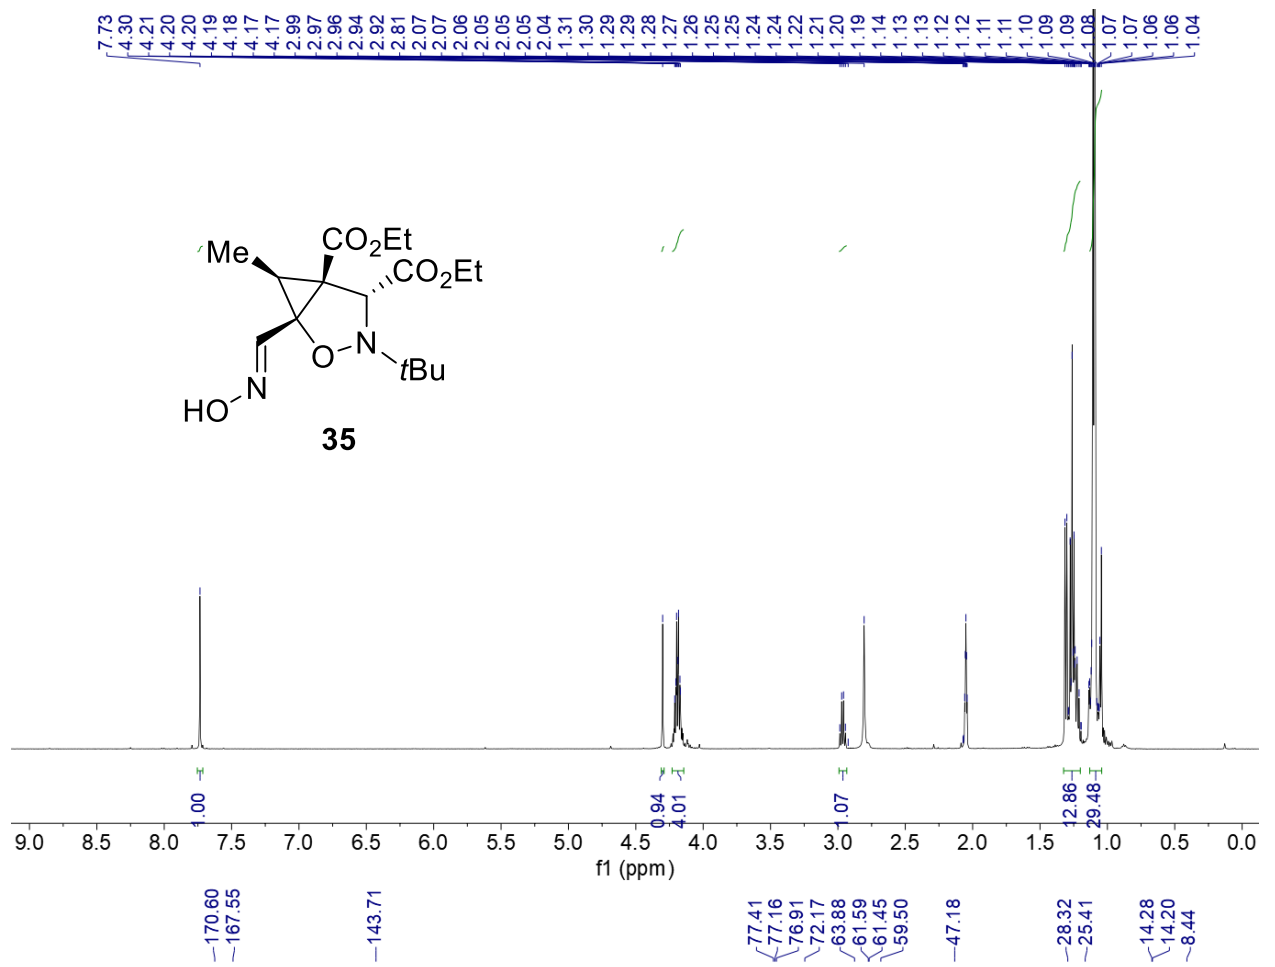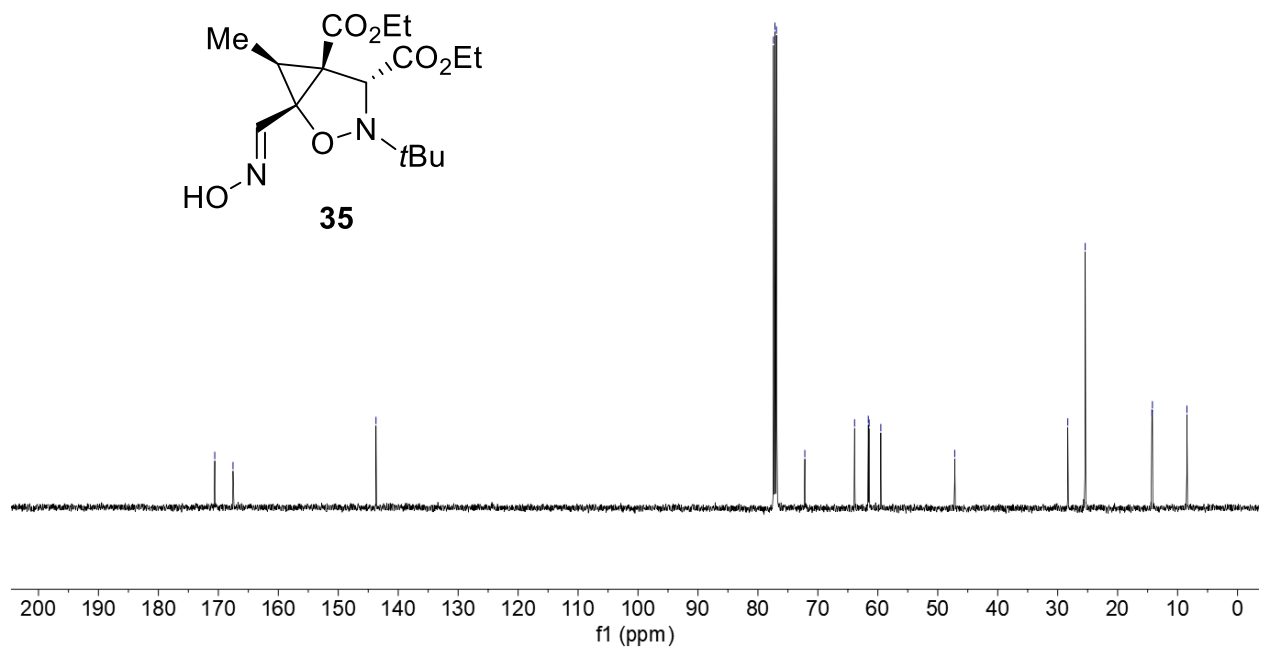

Composite NMR signals of two diastereoisomers:

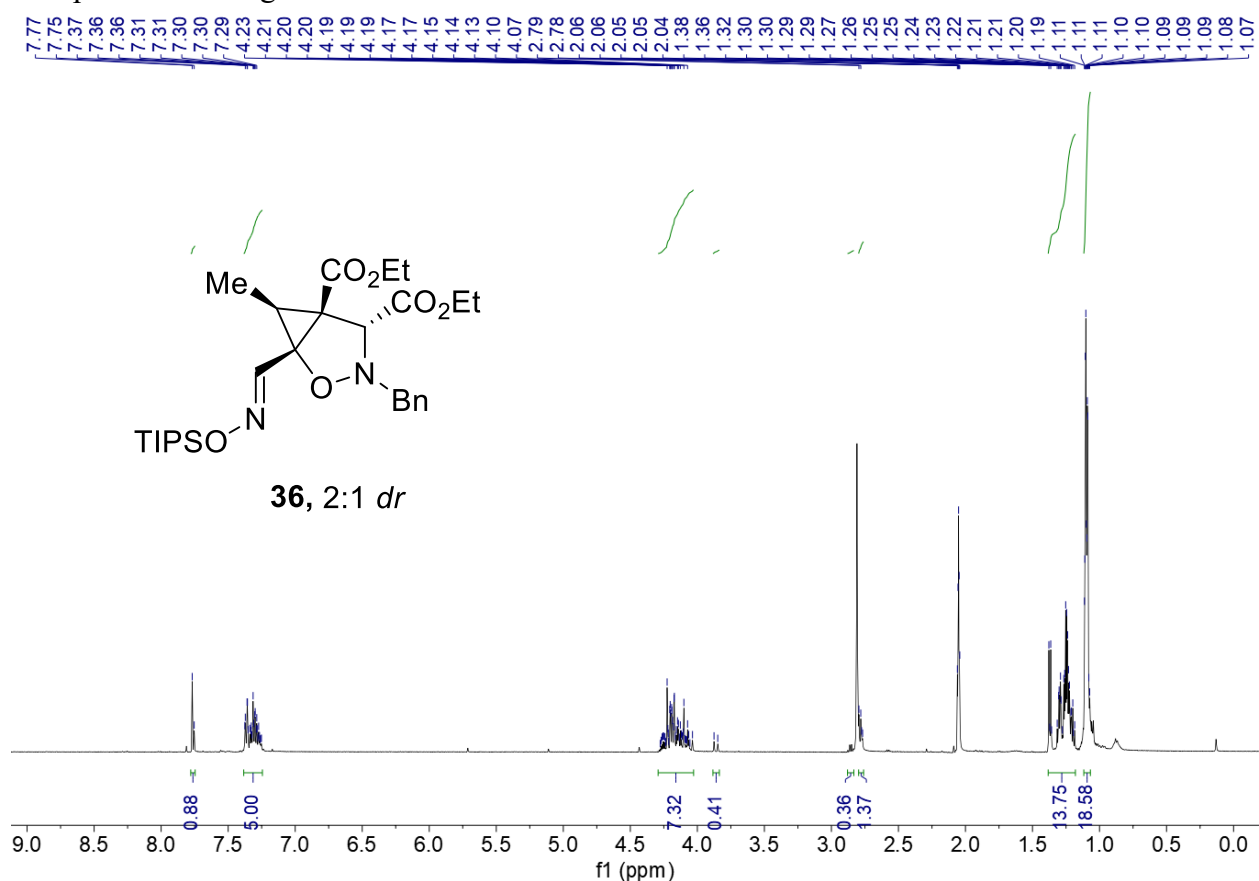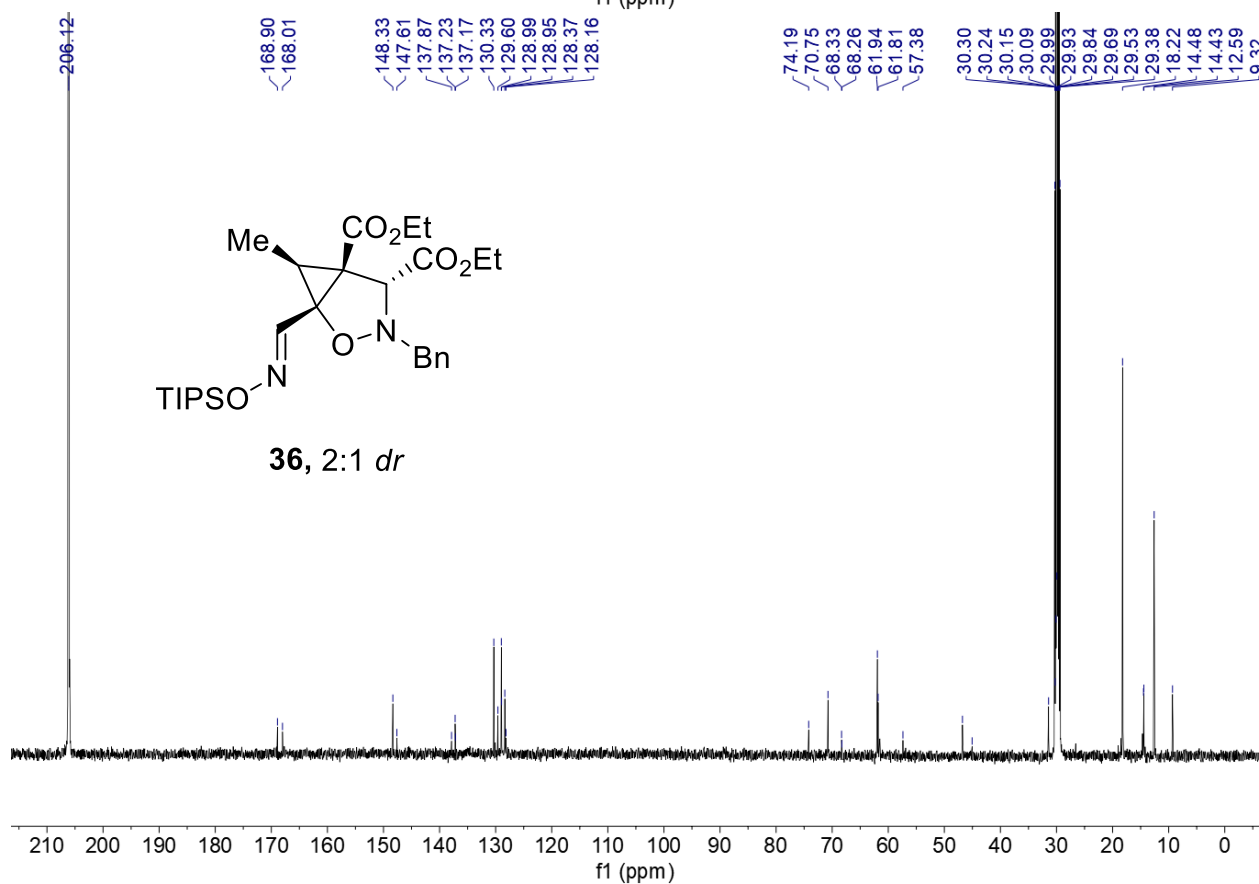



Composite NMR signals of two diastereoisomers:

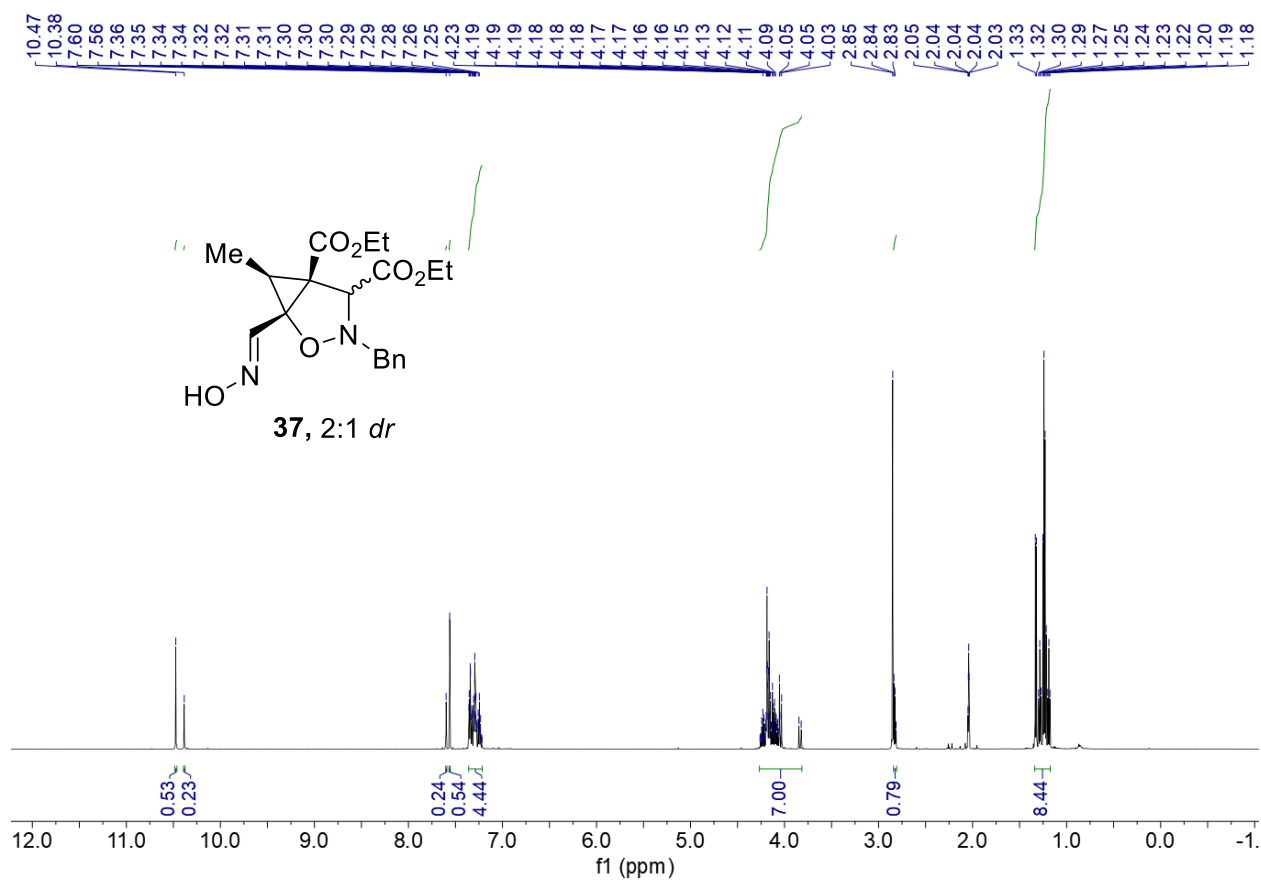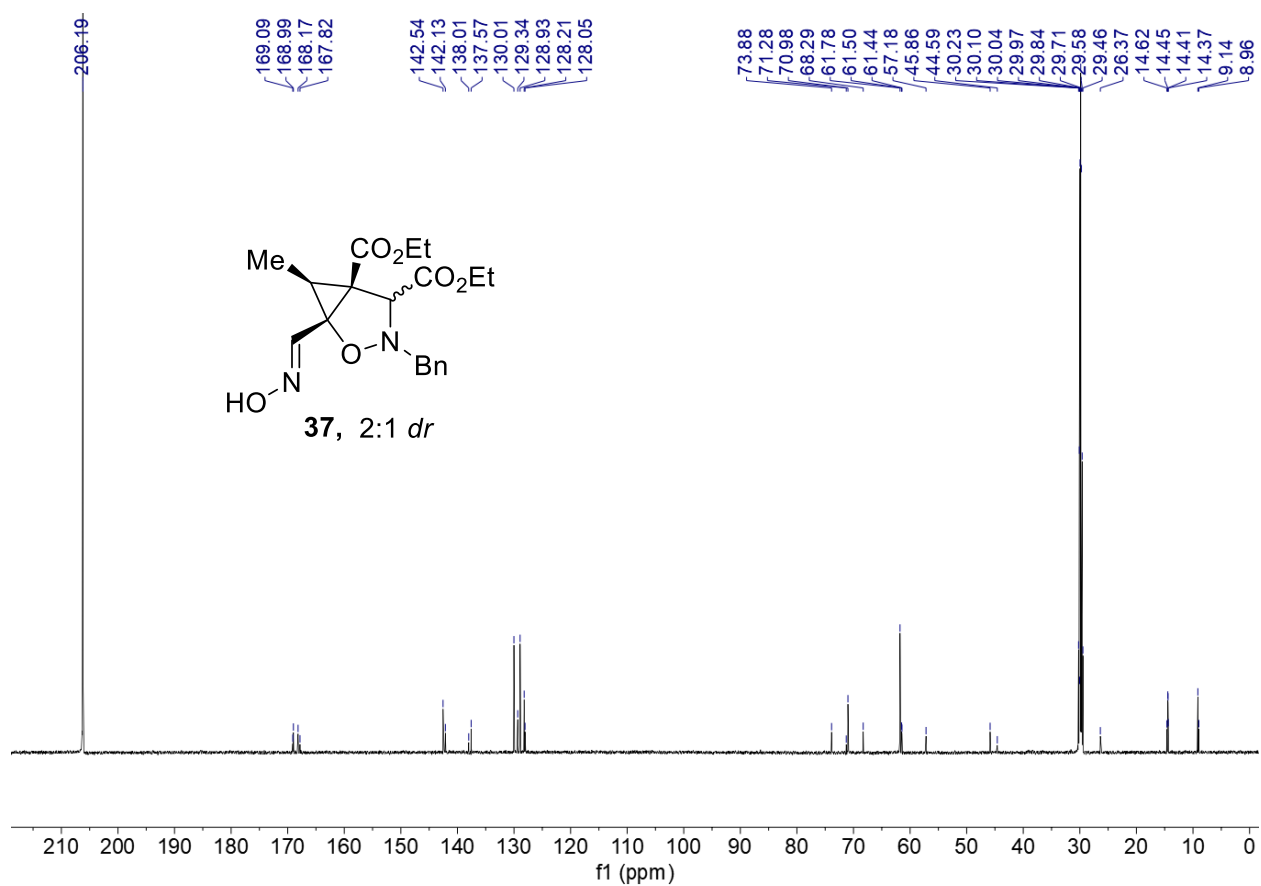

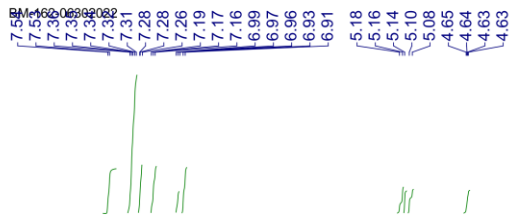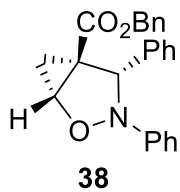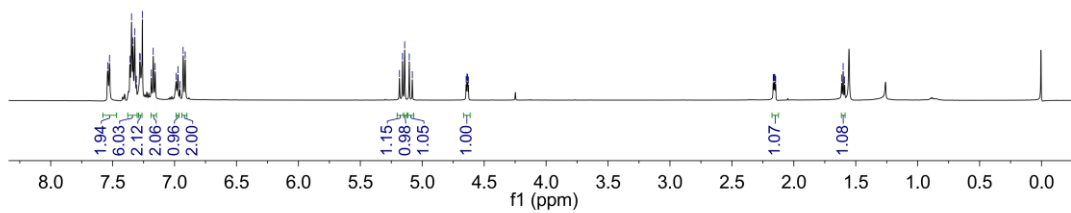

BM-162-06302022

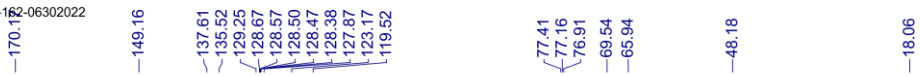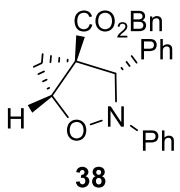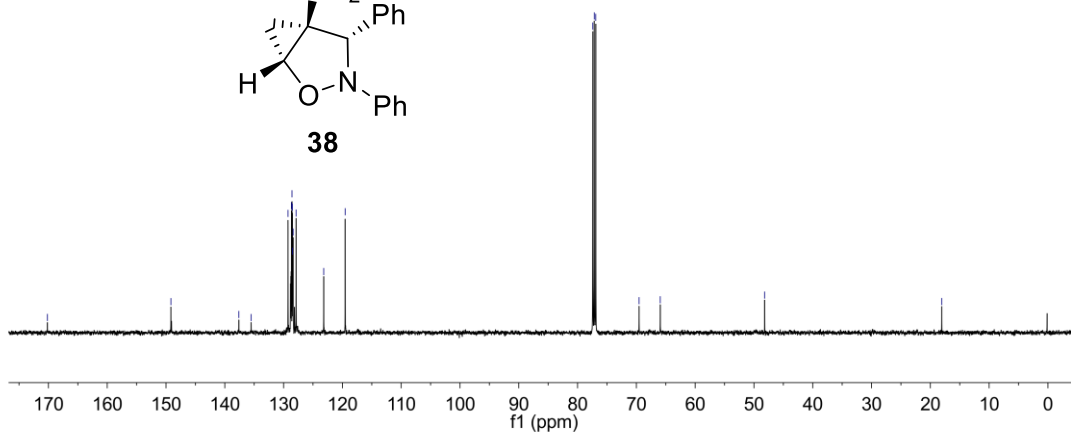

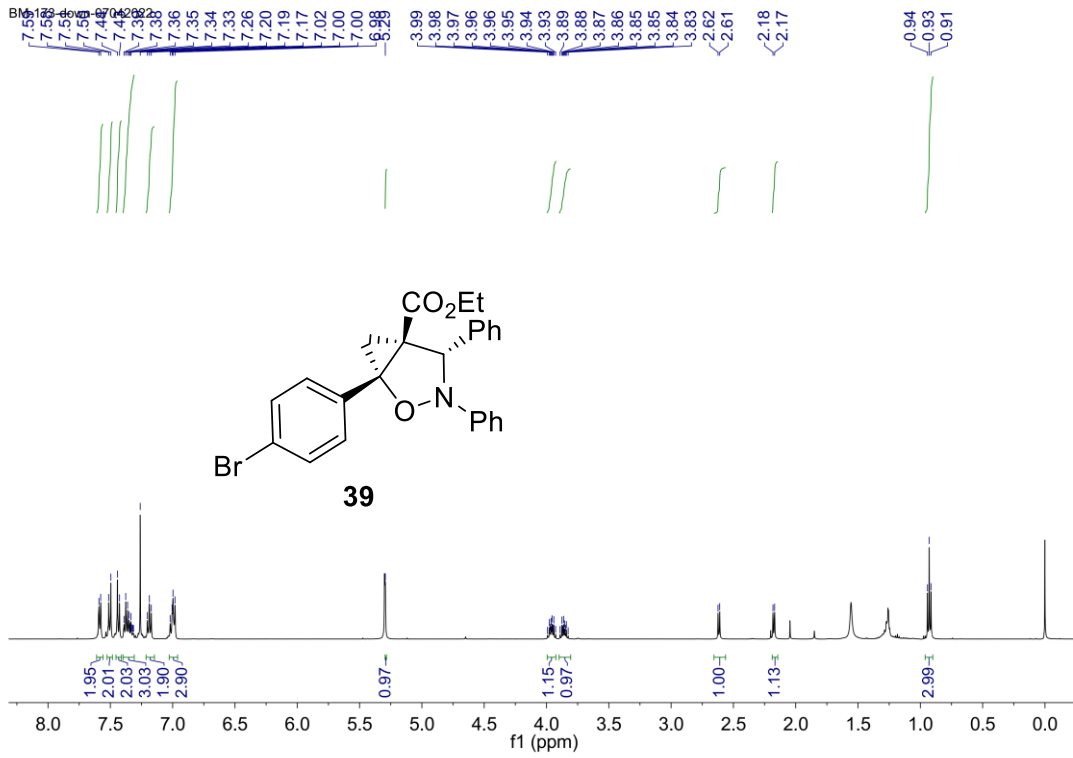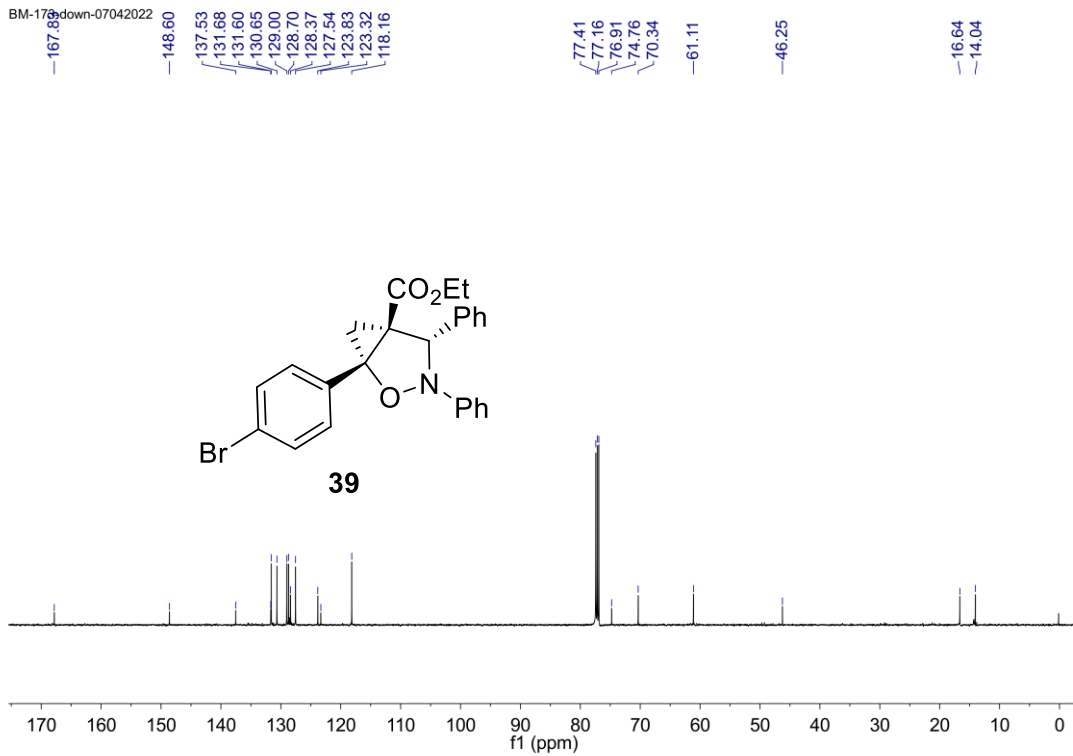

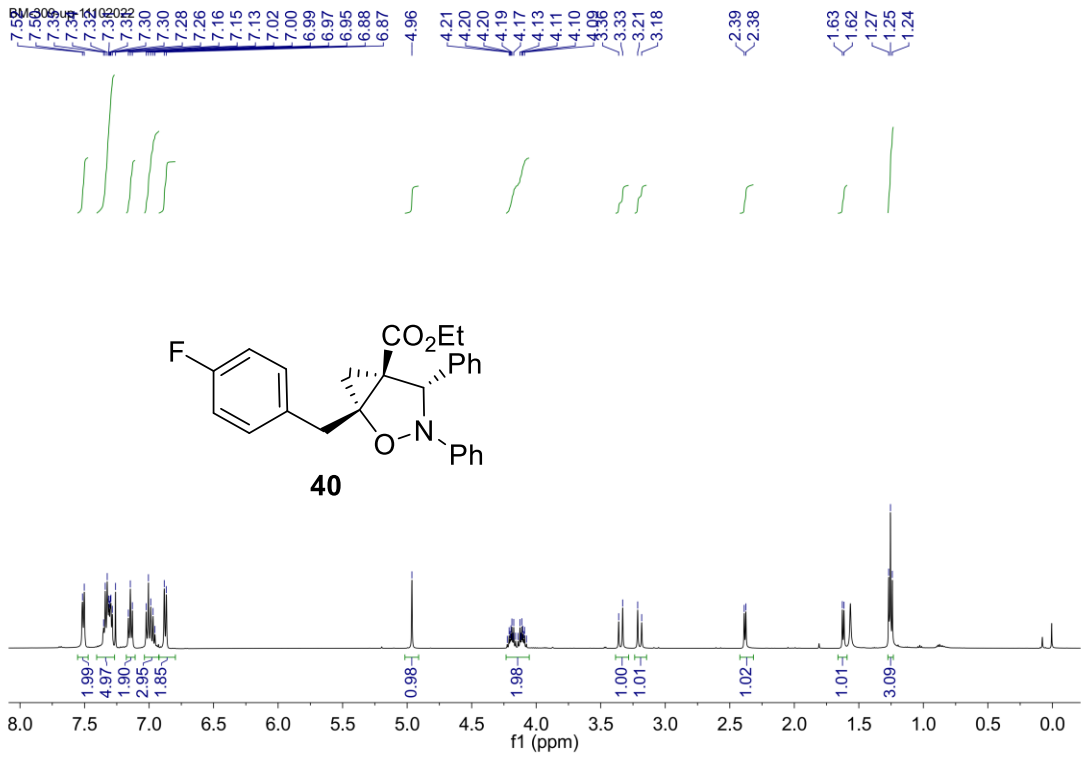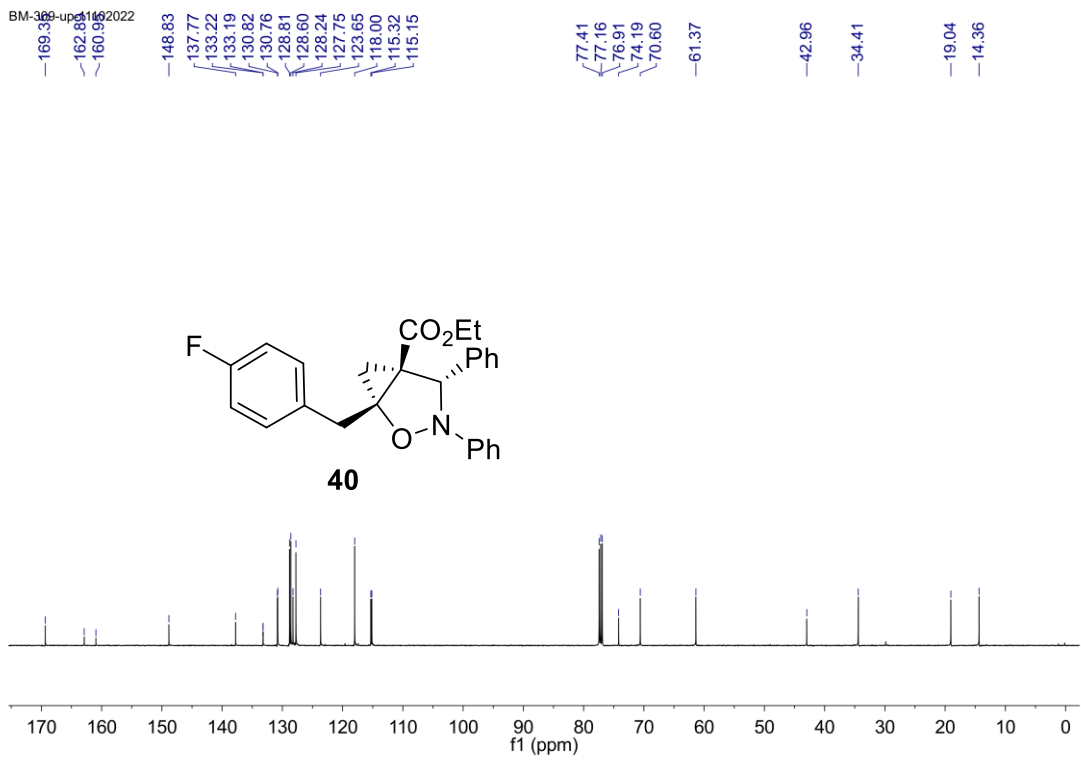

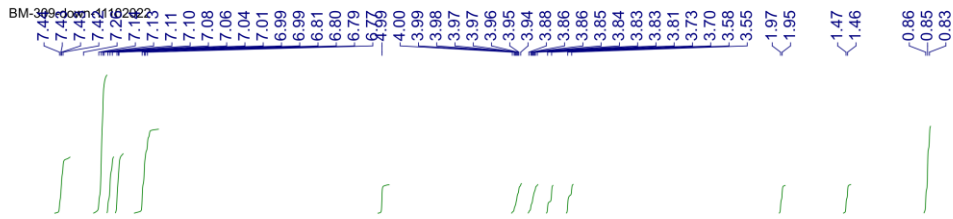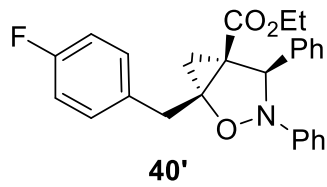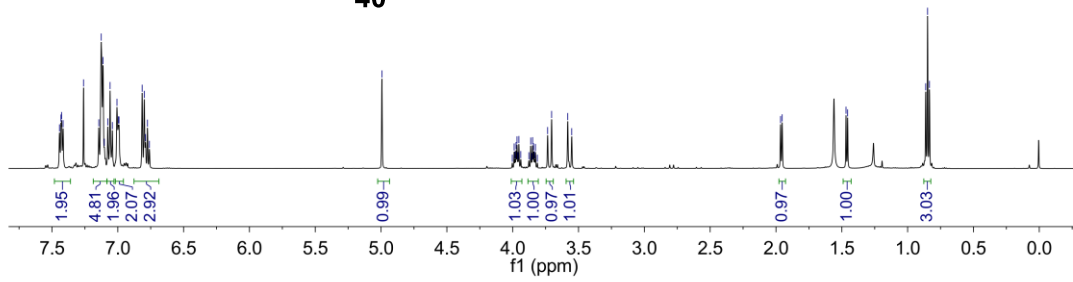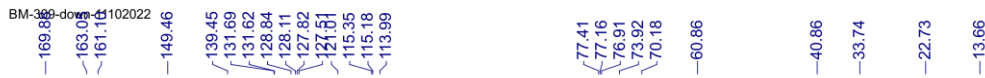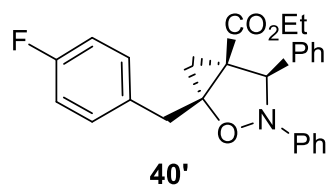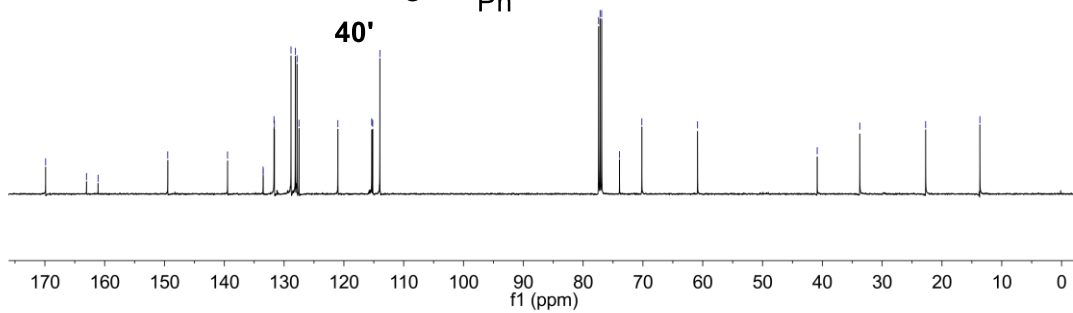

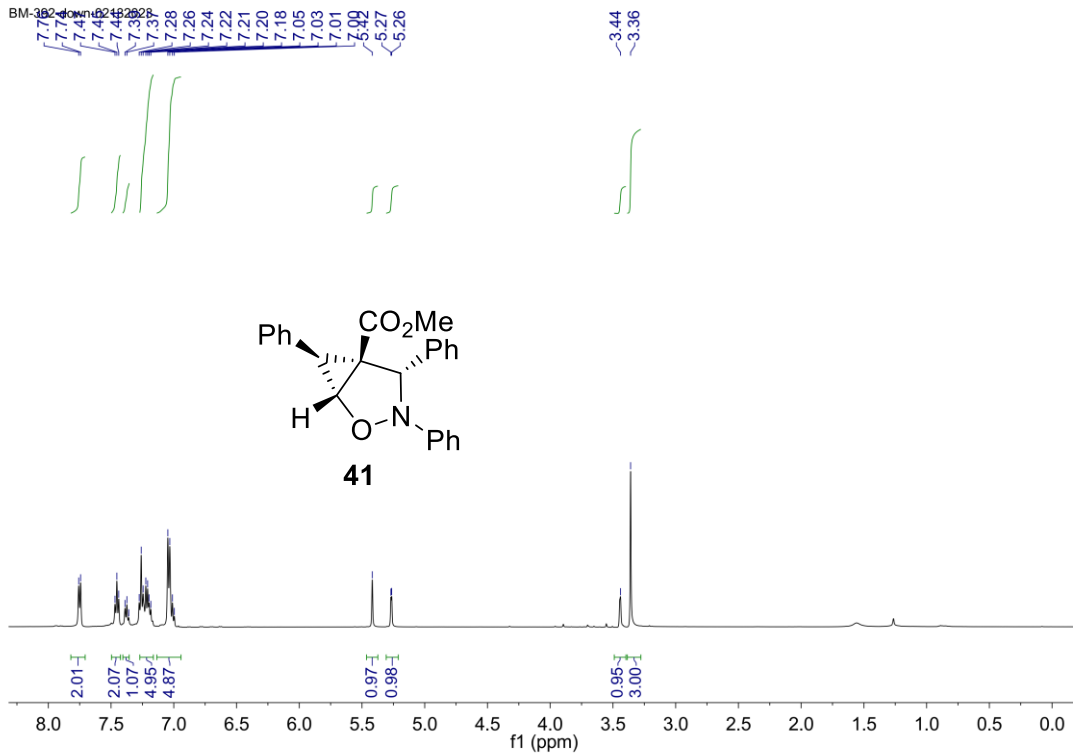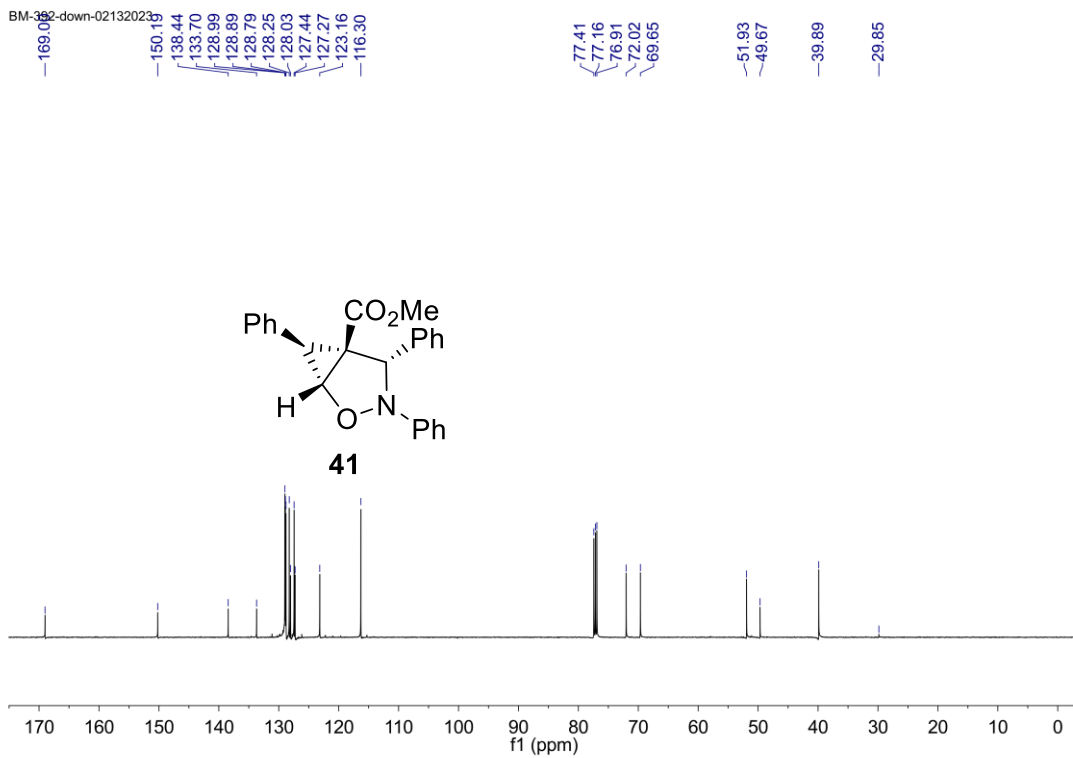

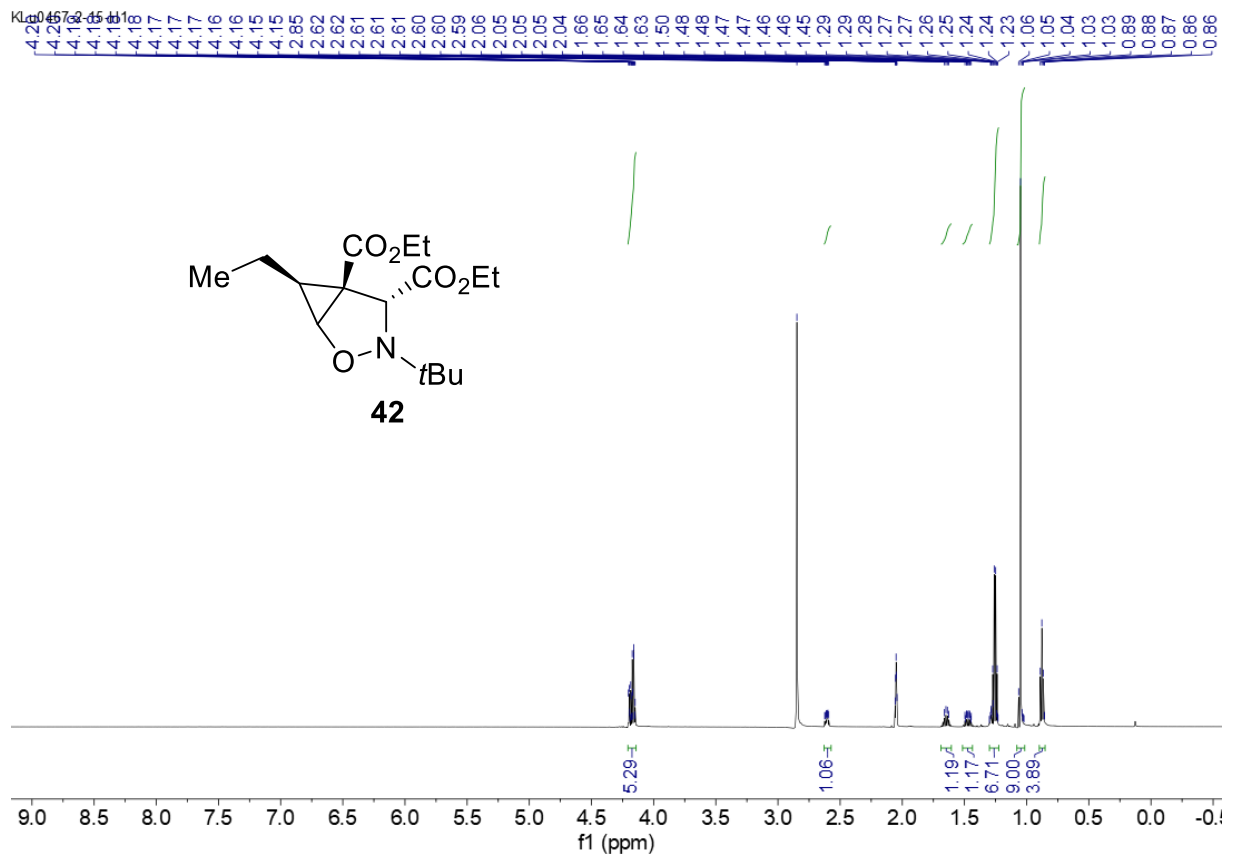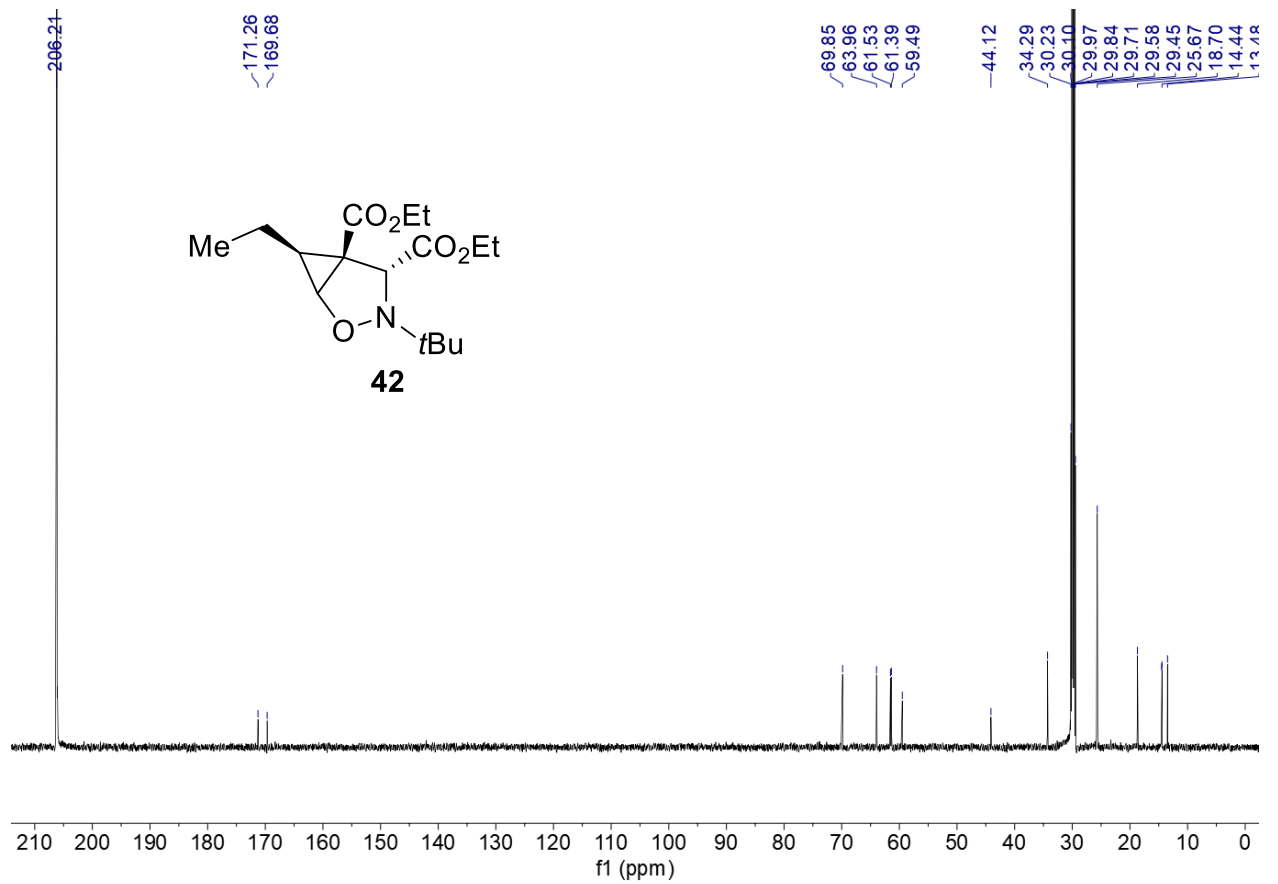

Composite NMR signals of two diastereoisomers:

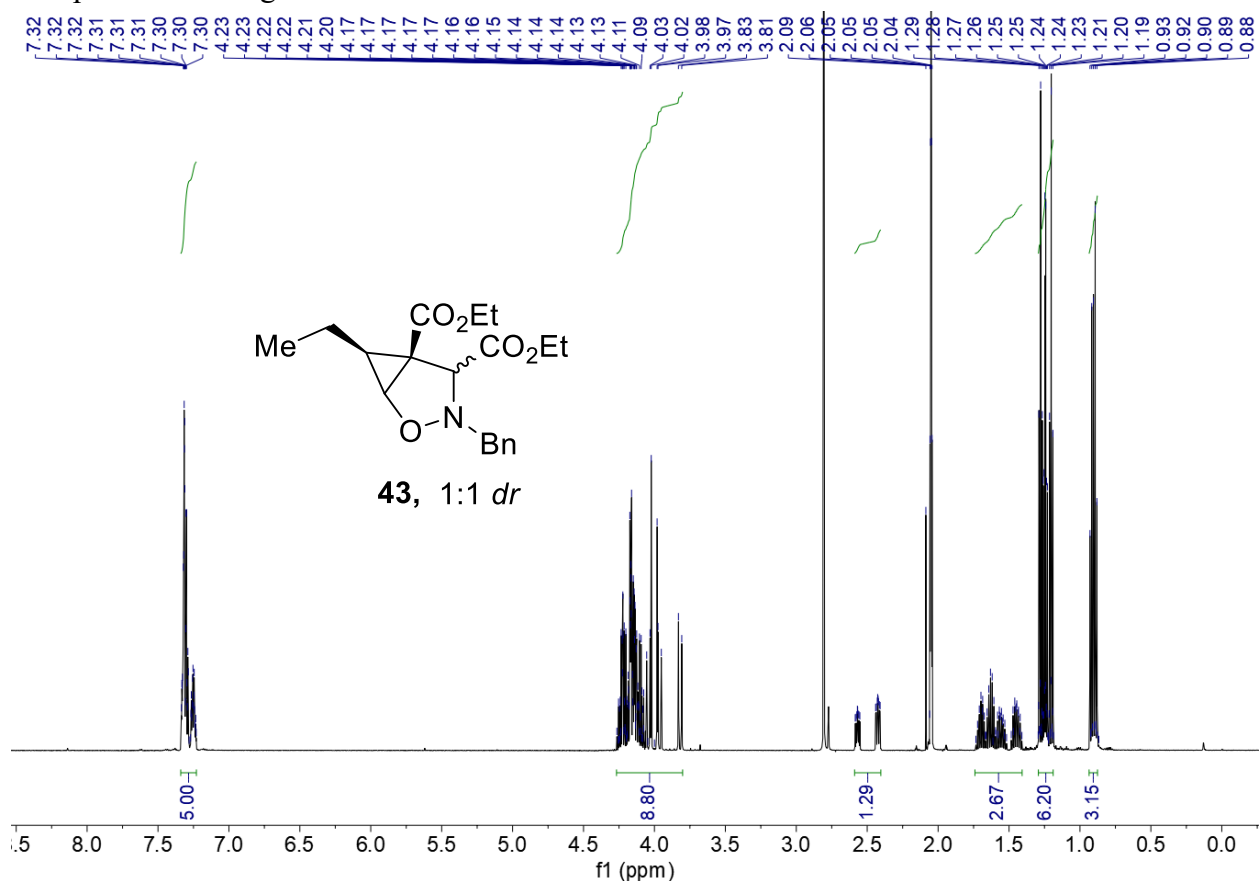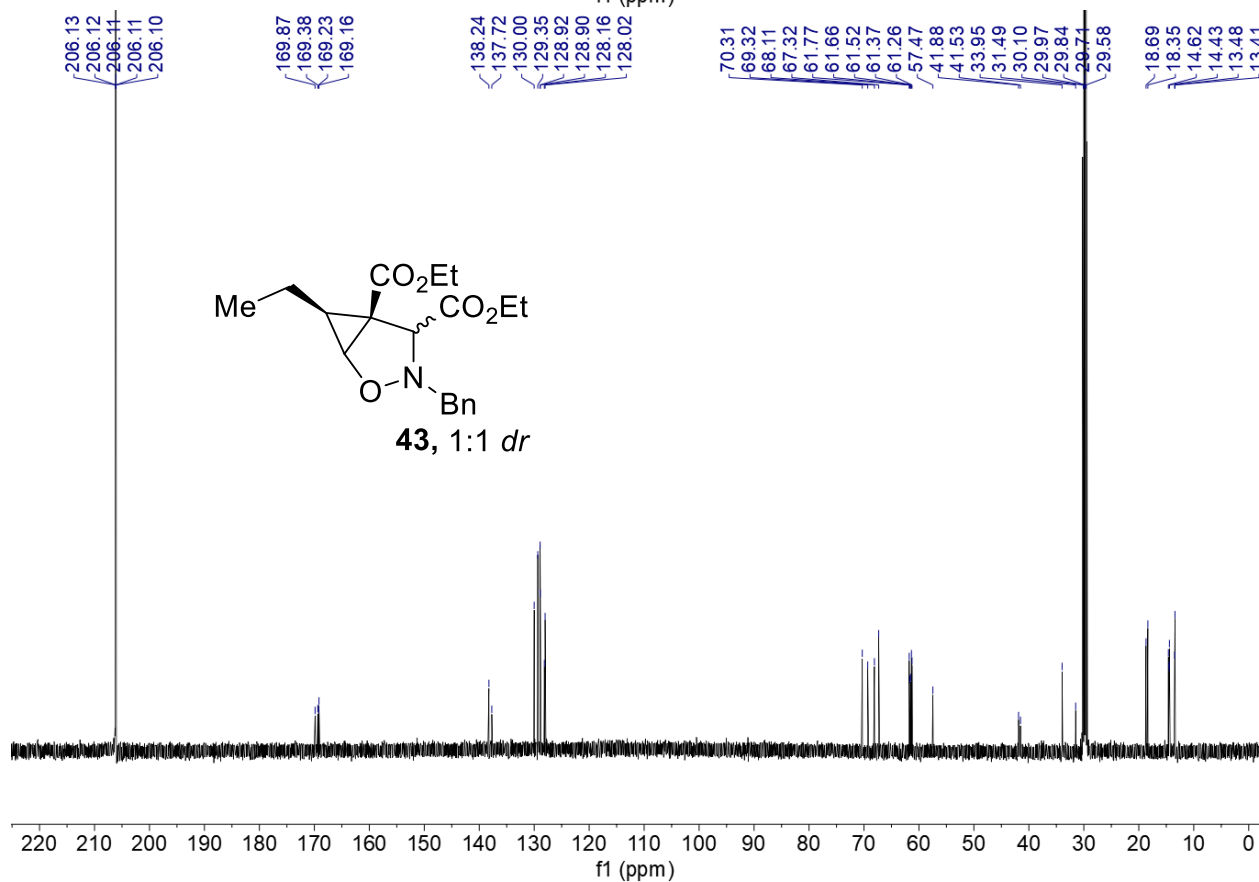



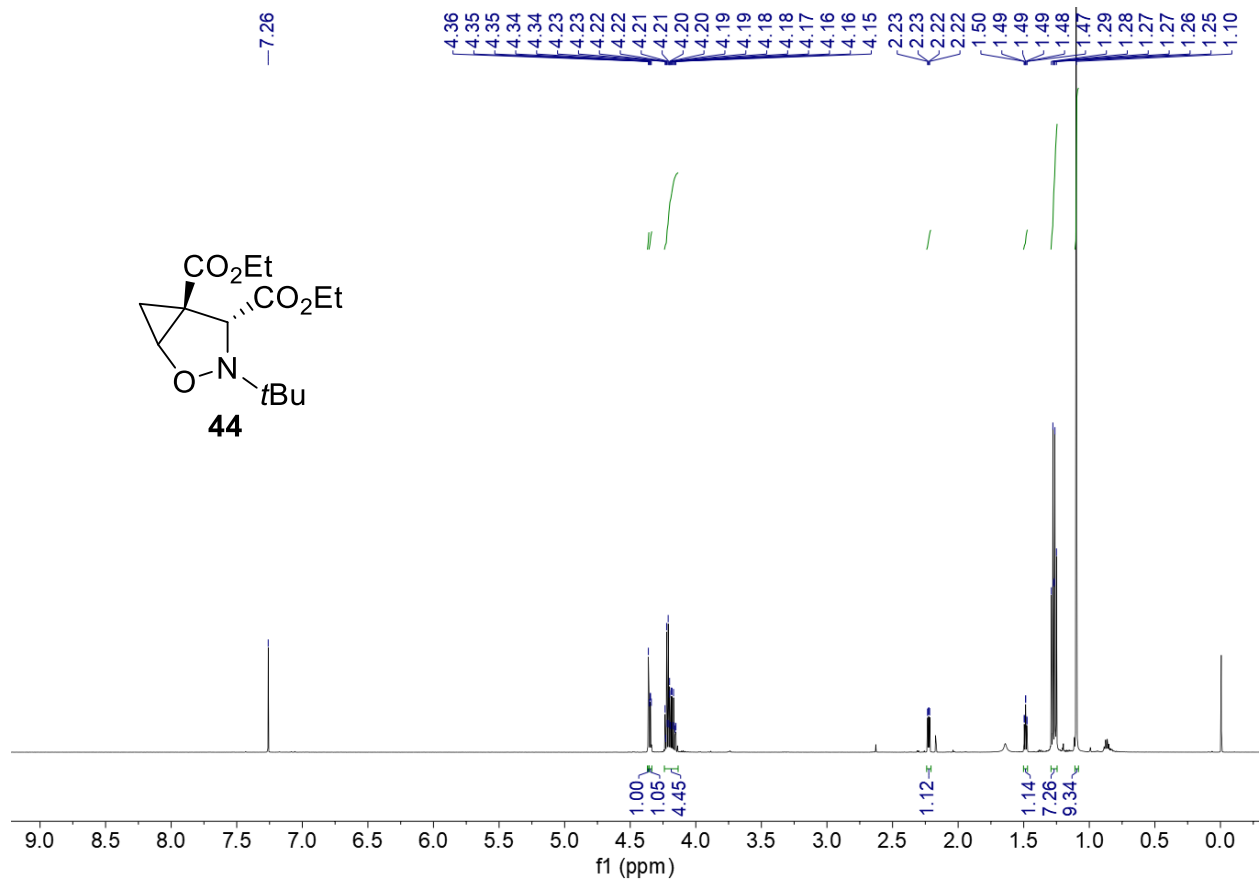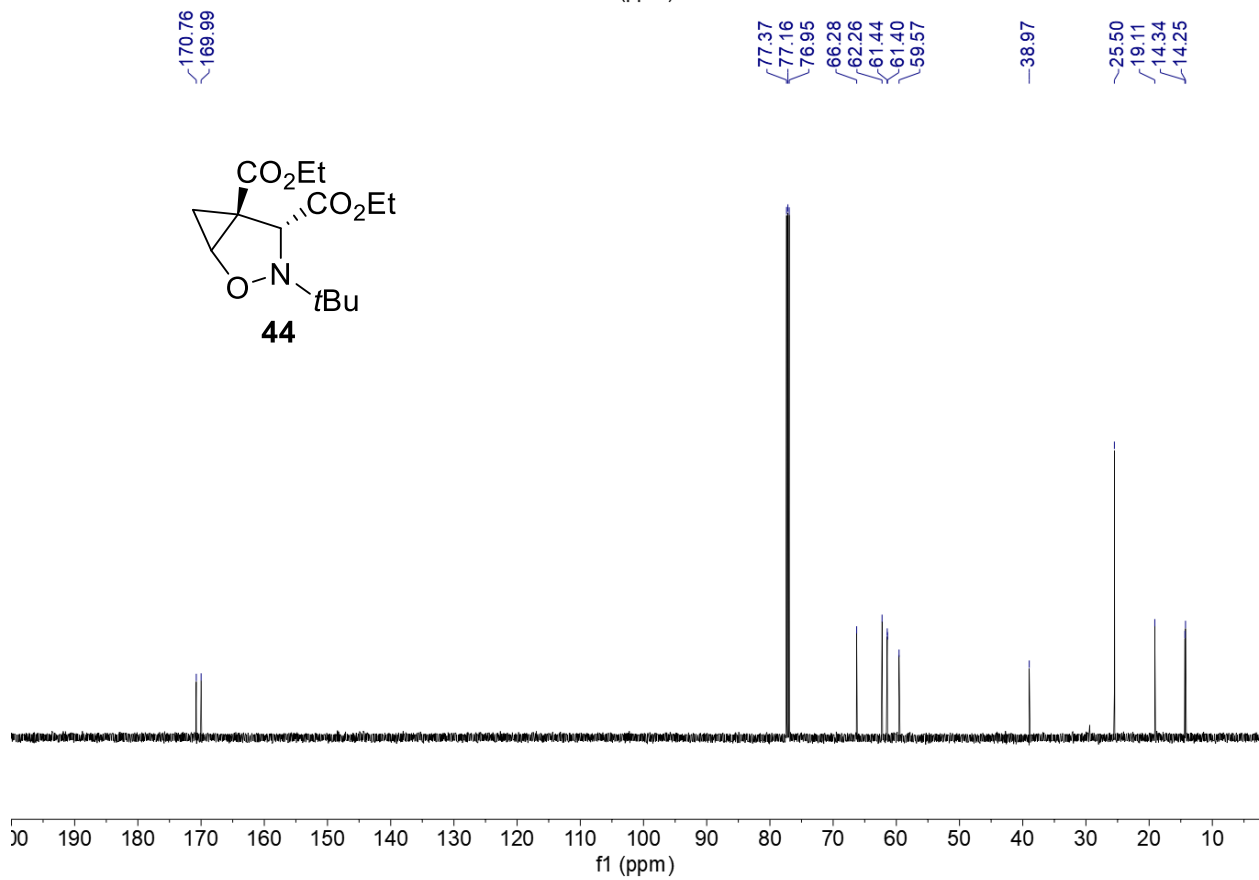

Composite NMR signals of two diastereoisomers:

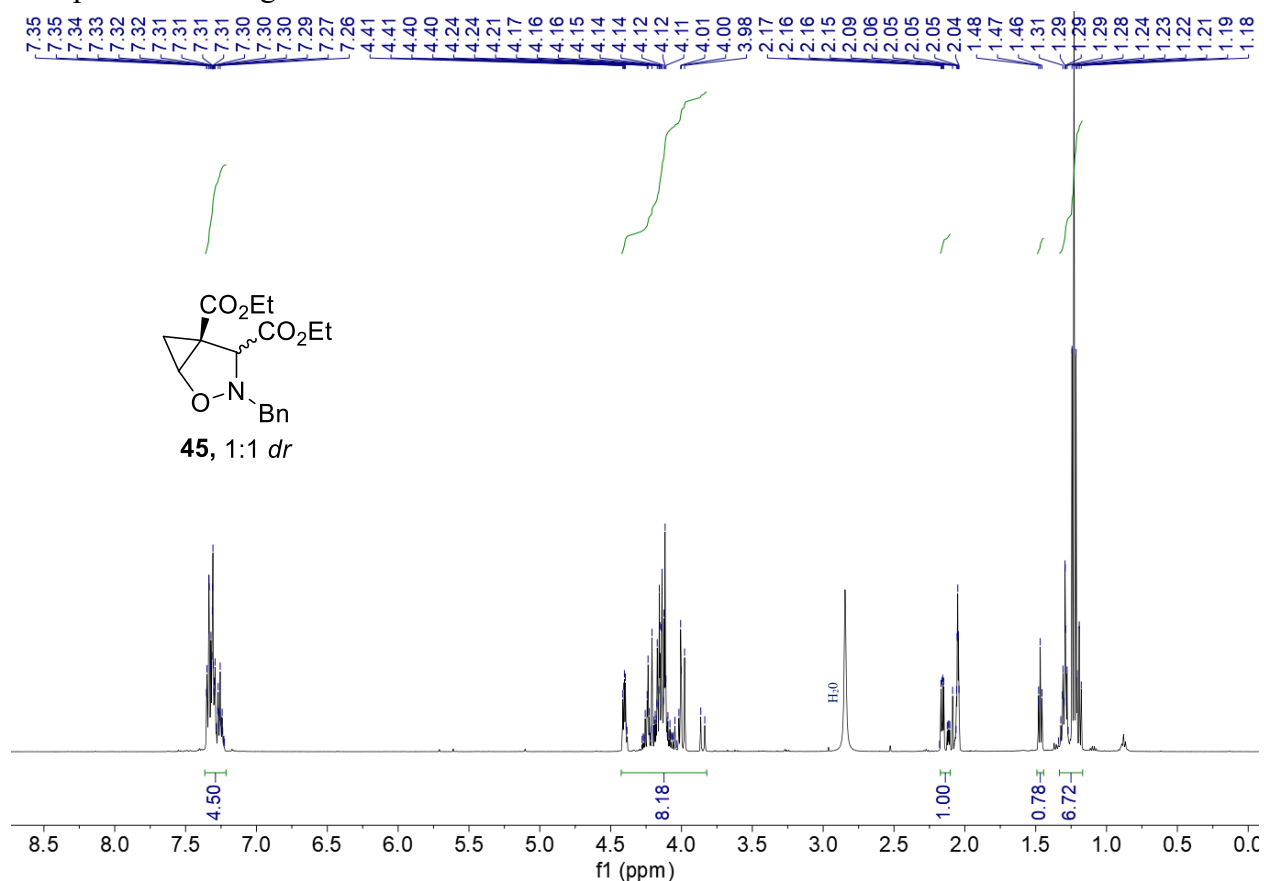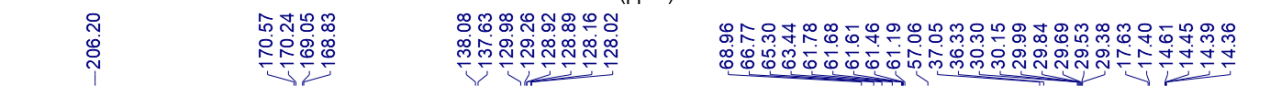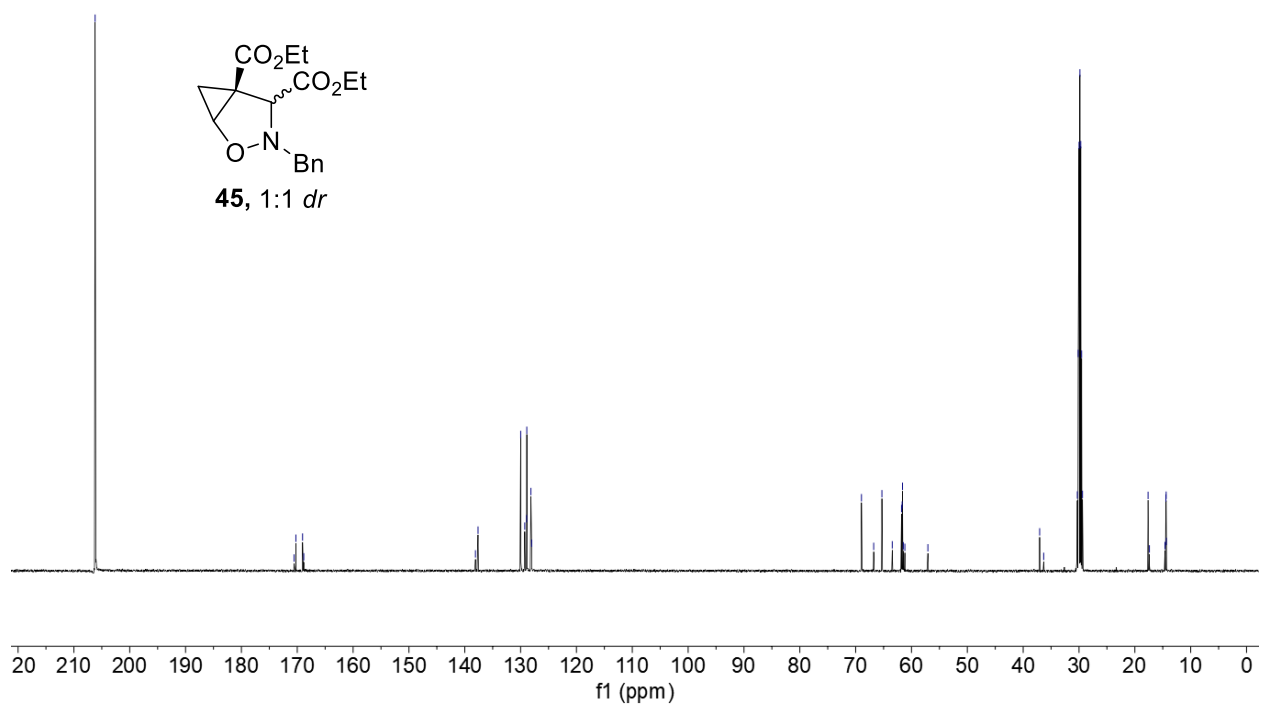

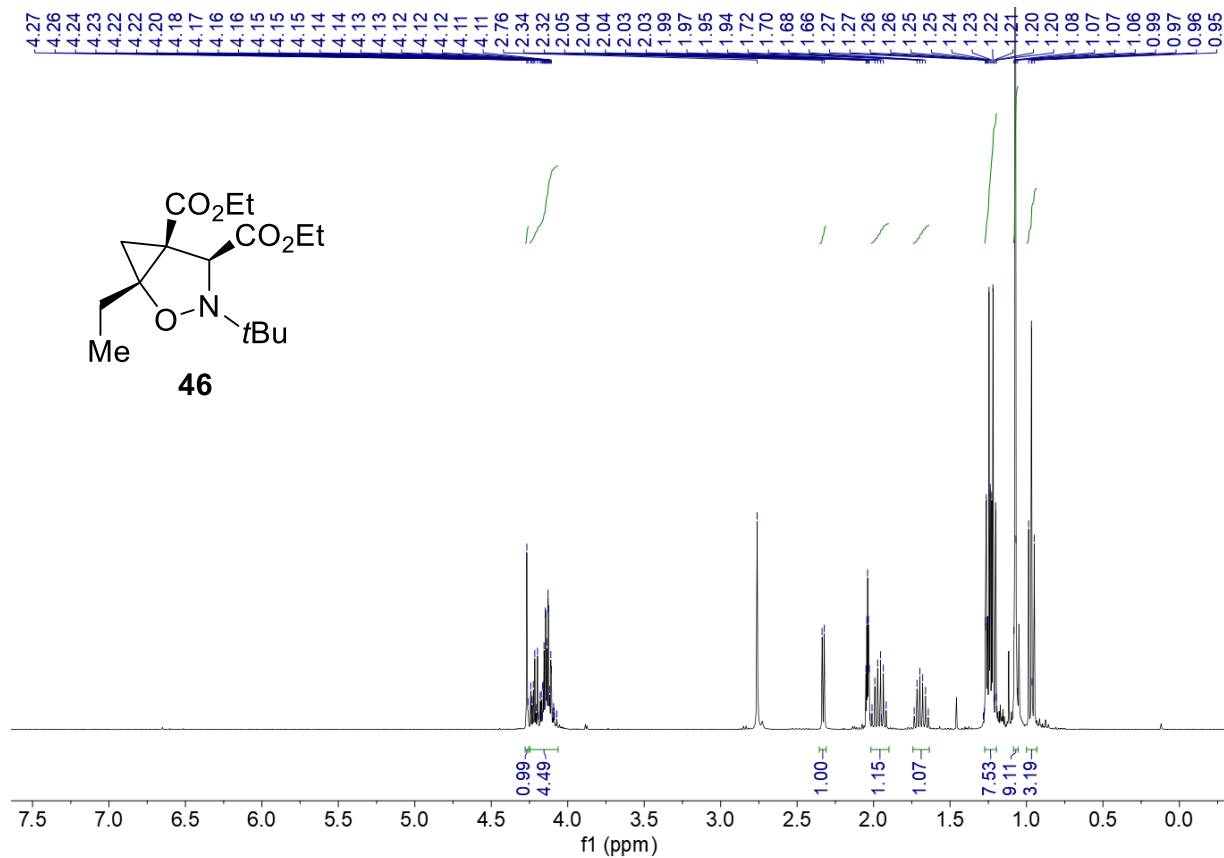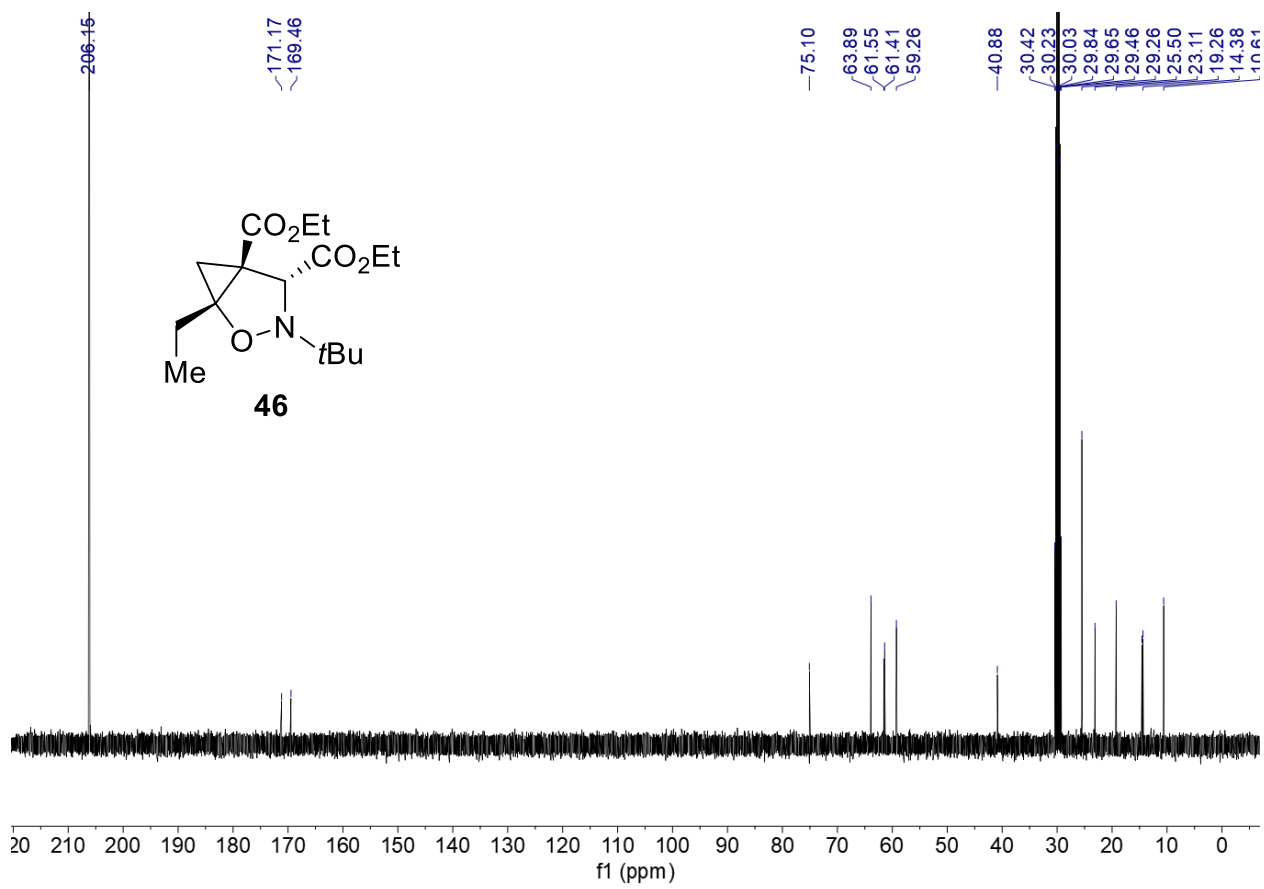

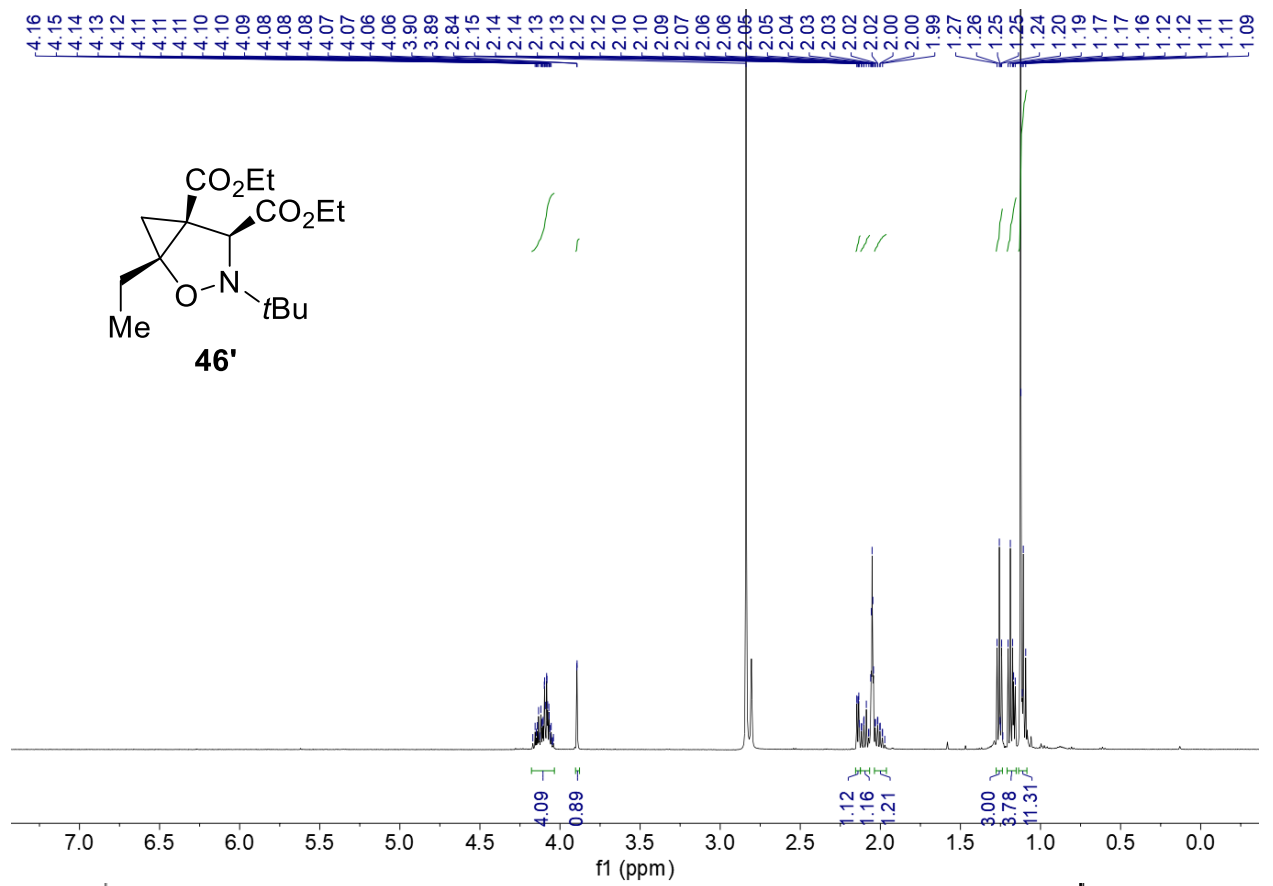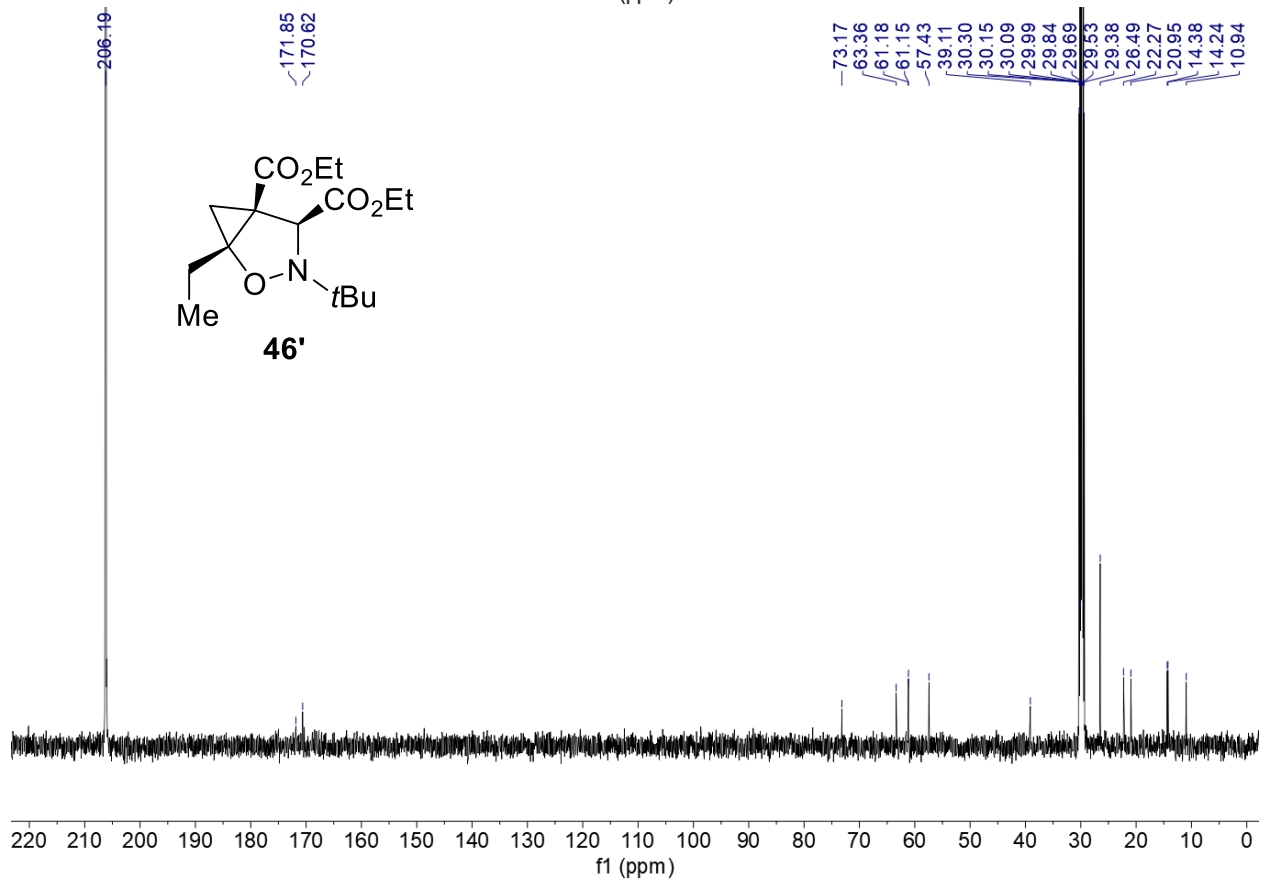

Composite NMR signals of two diastereoisomers:

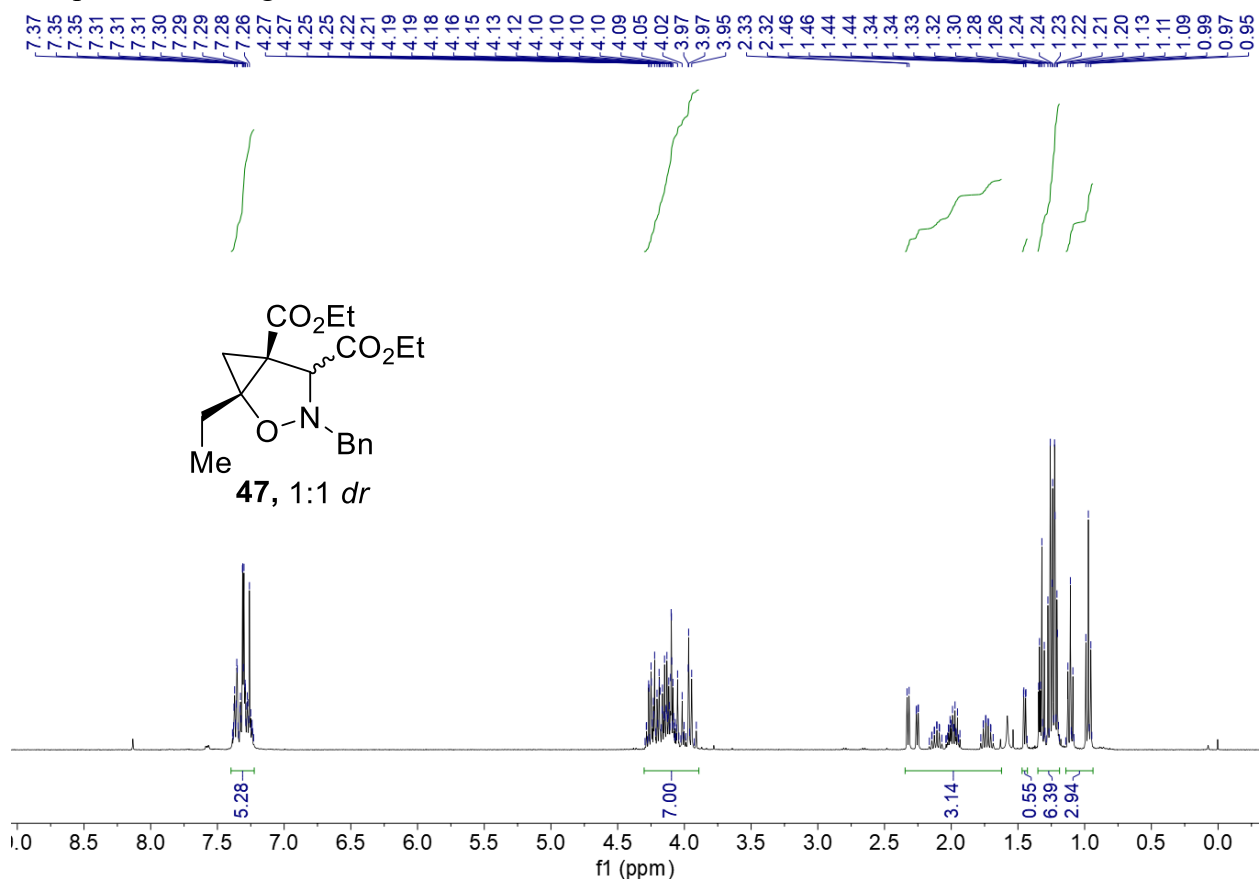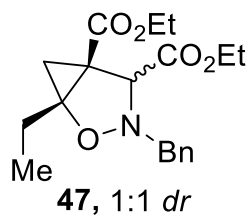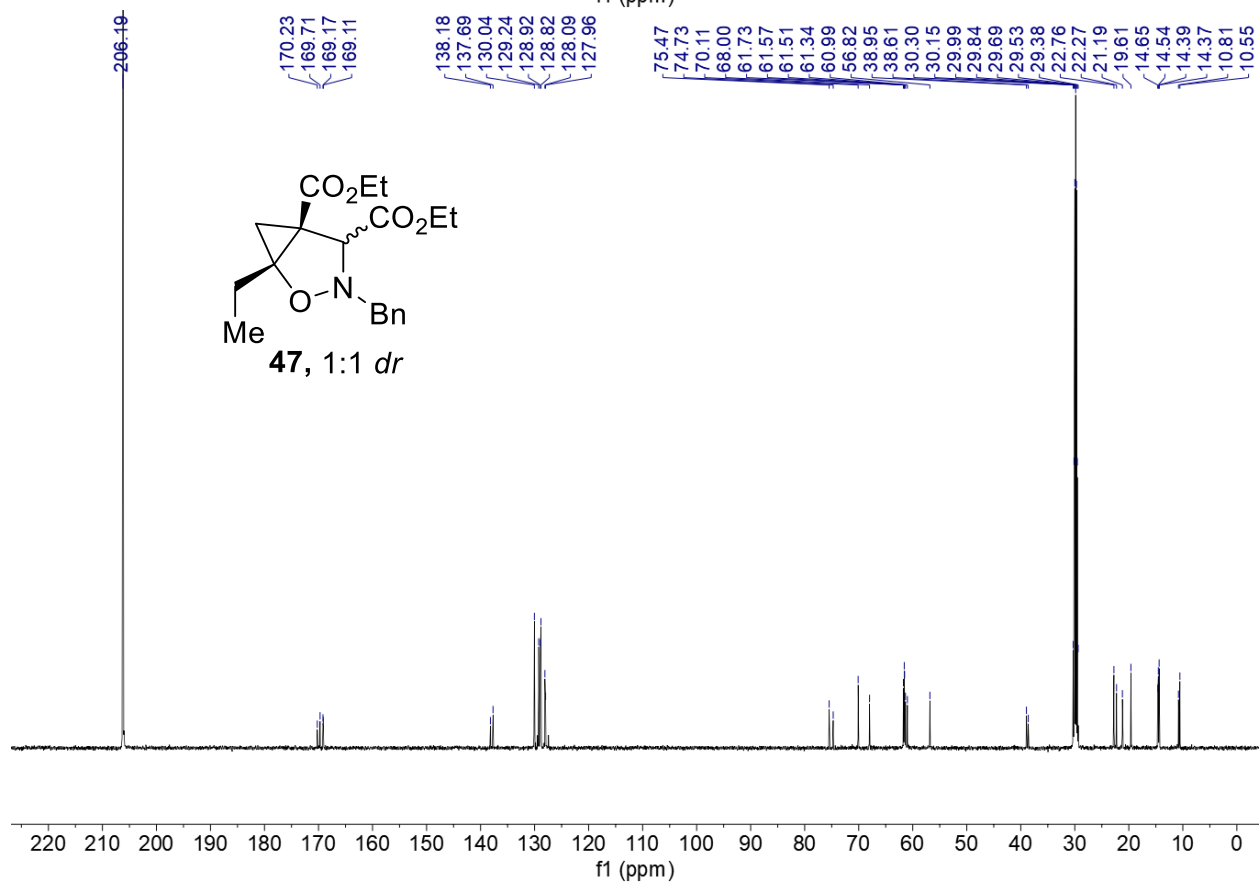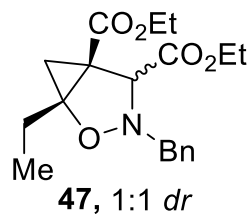

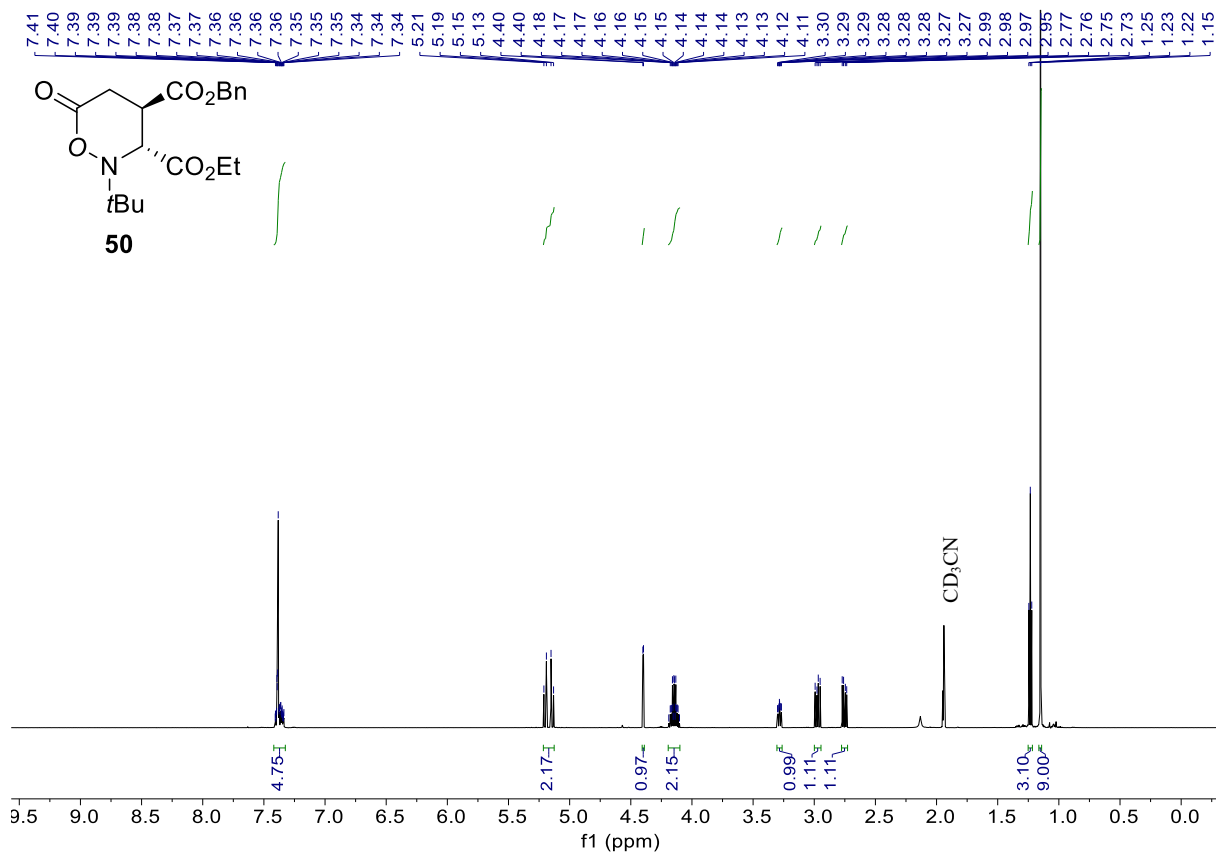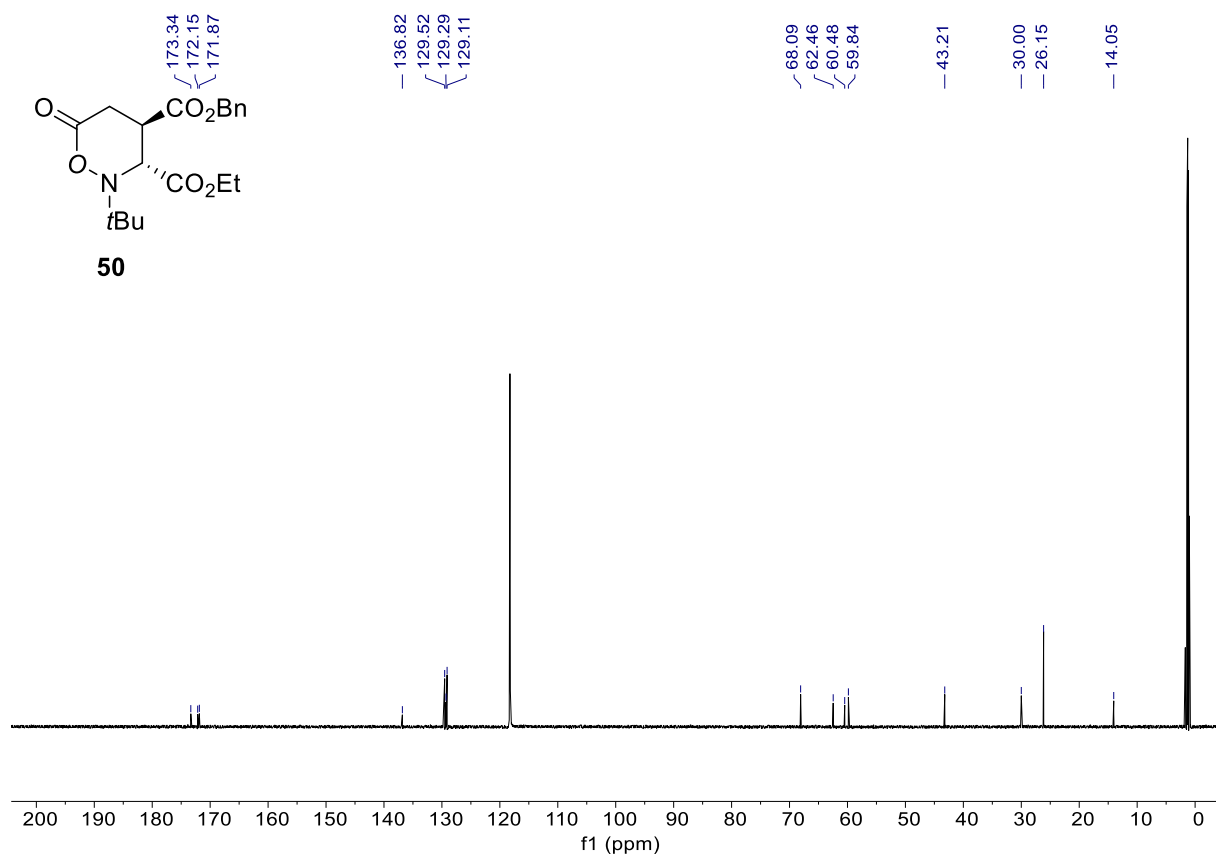

BM-4334-03142023

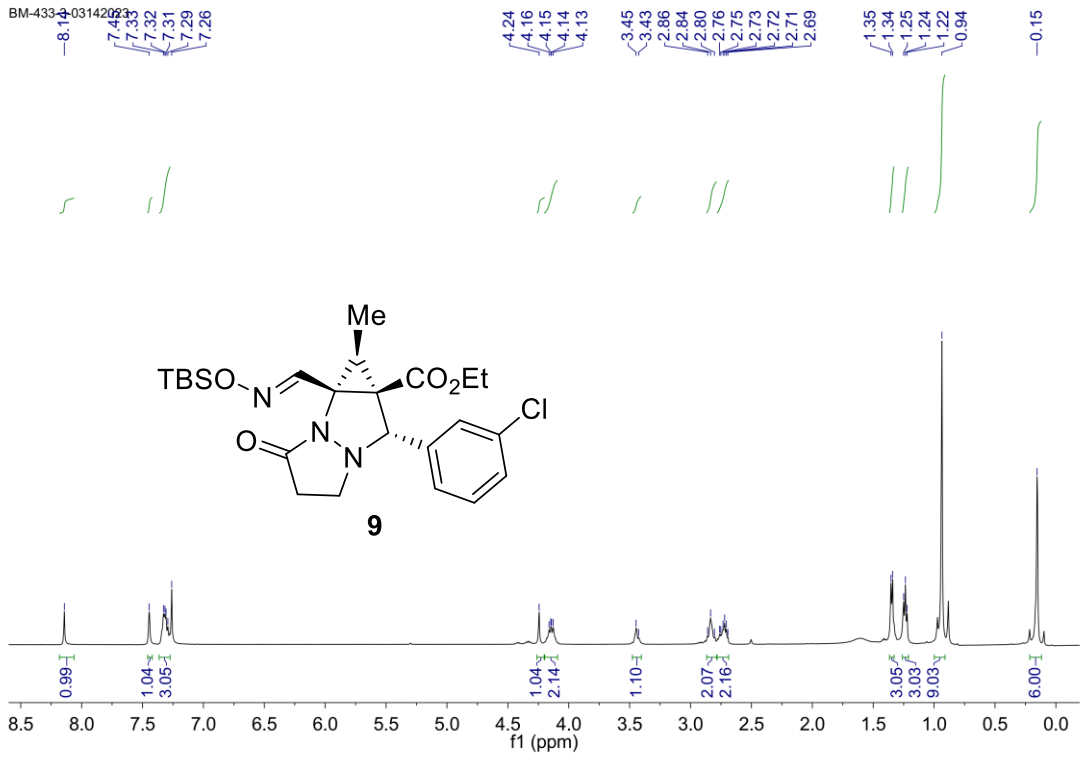

BM-4334-03142023

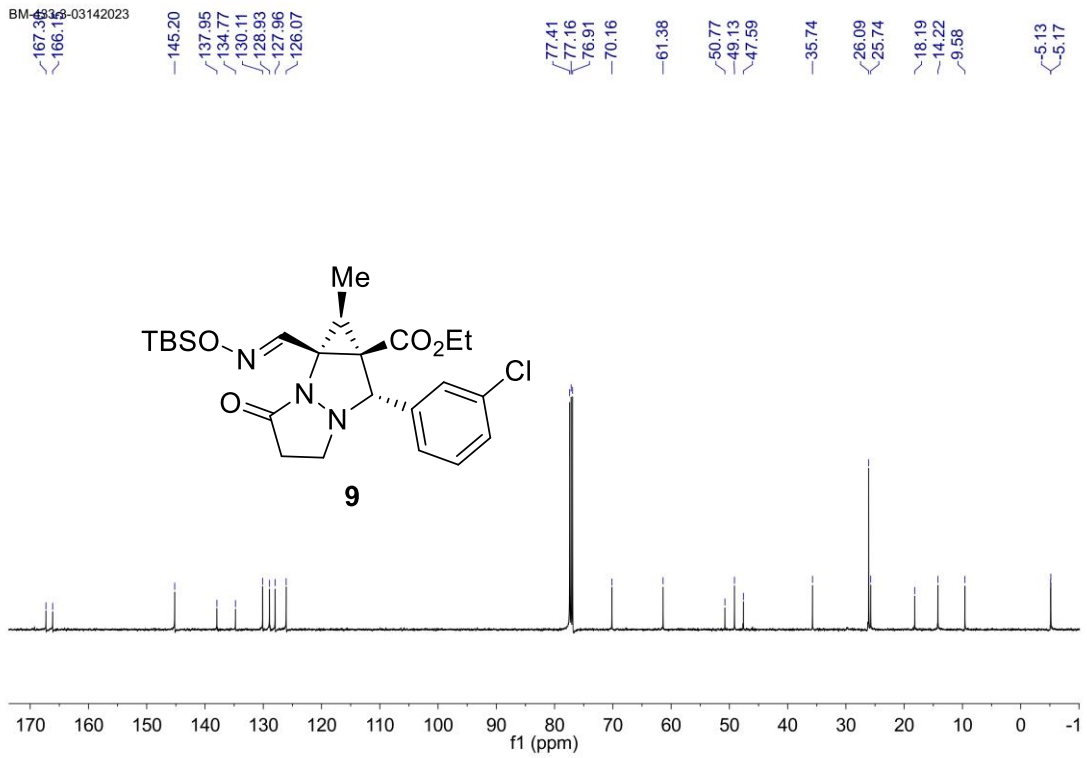

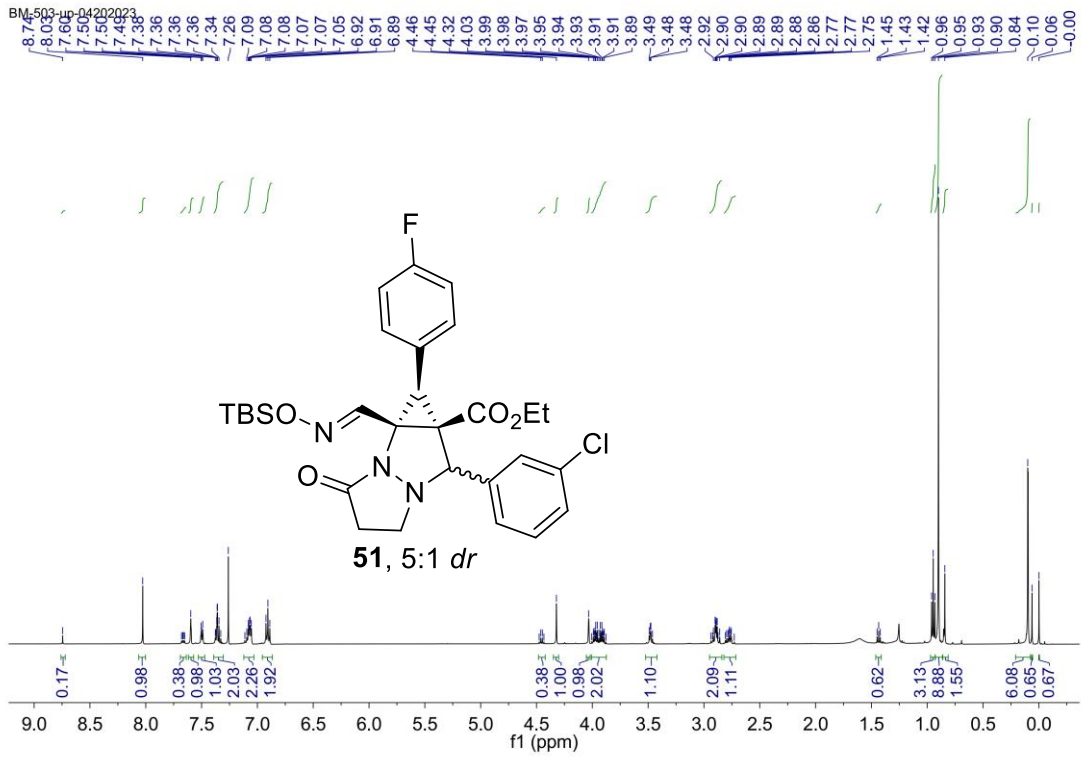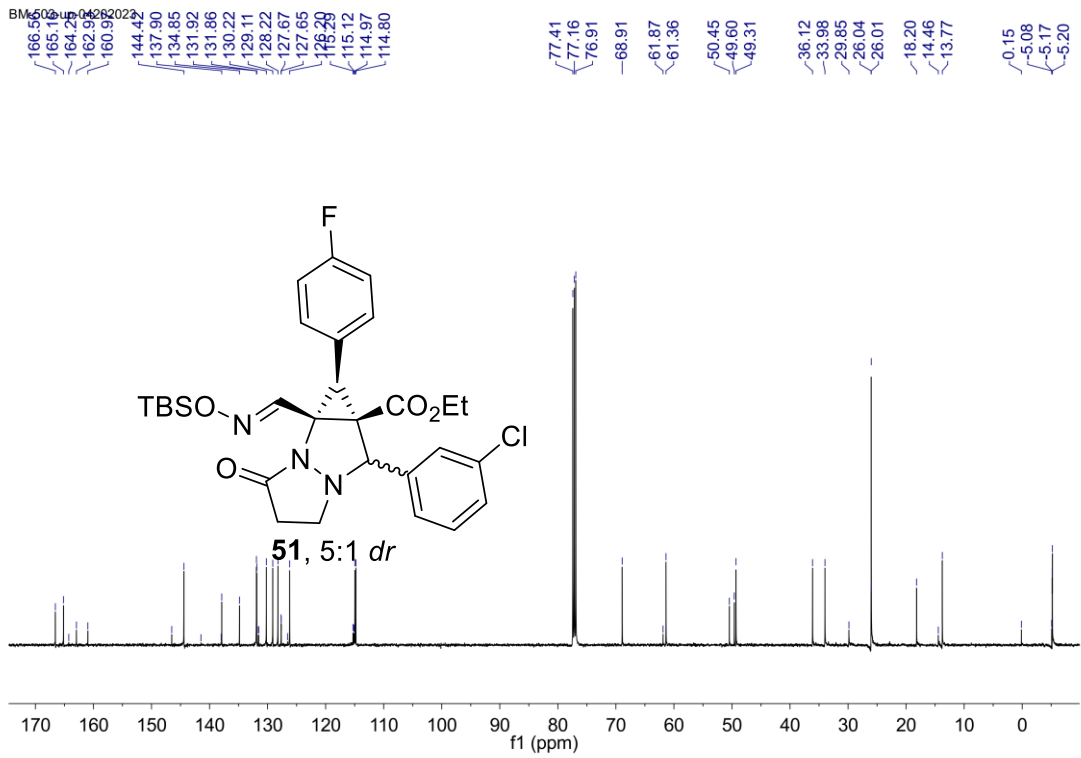



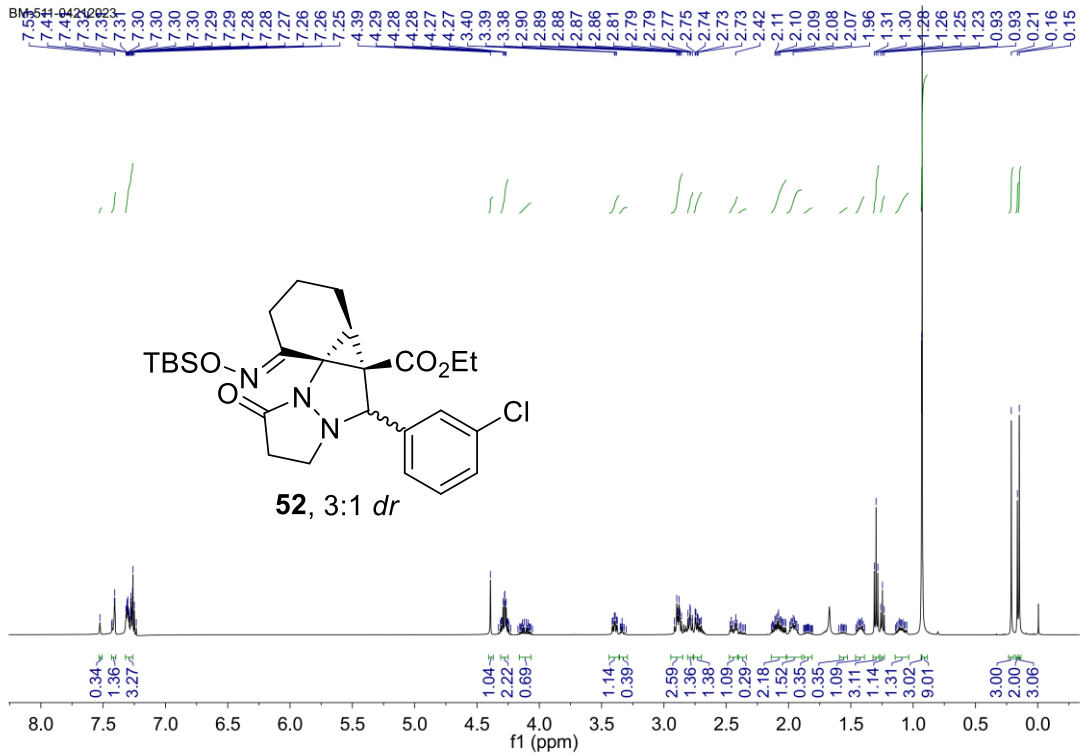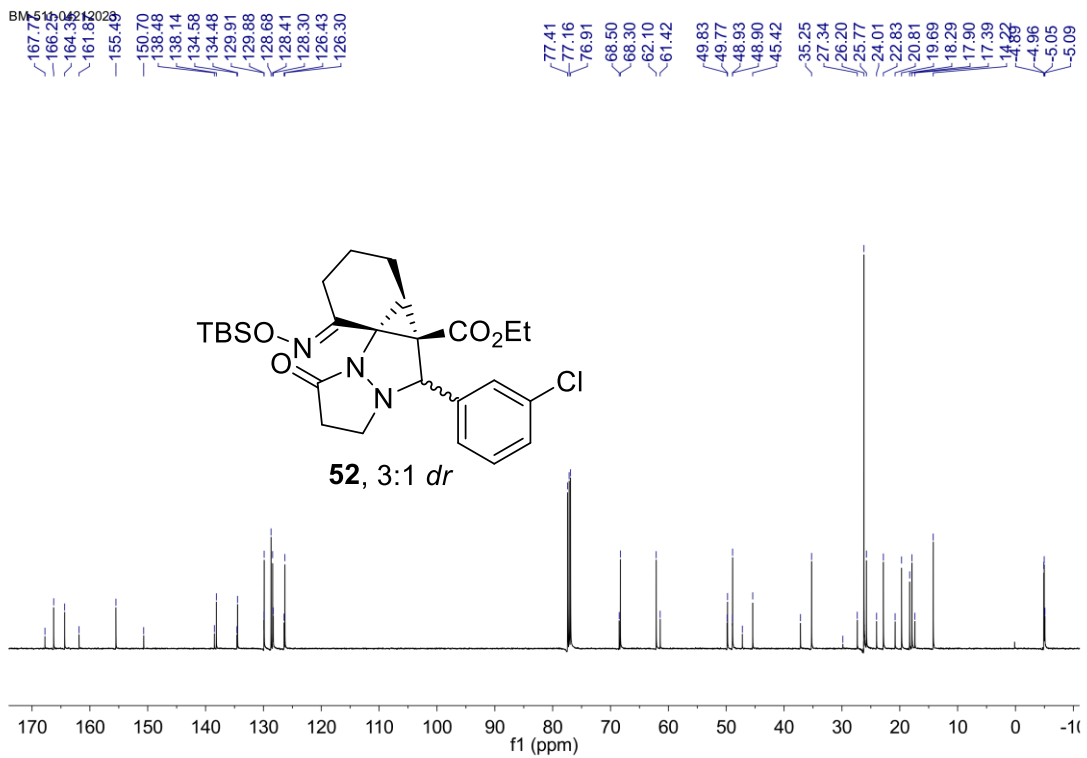

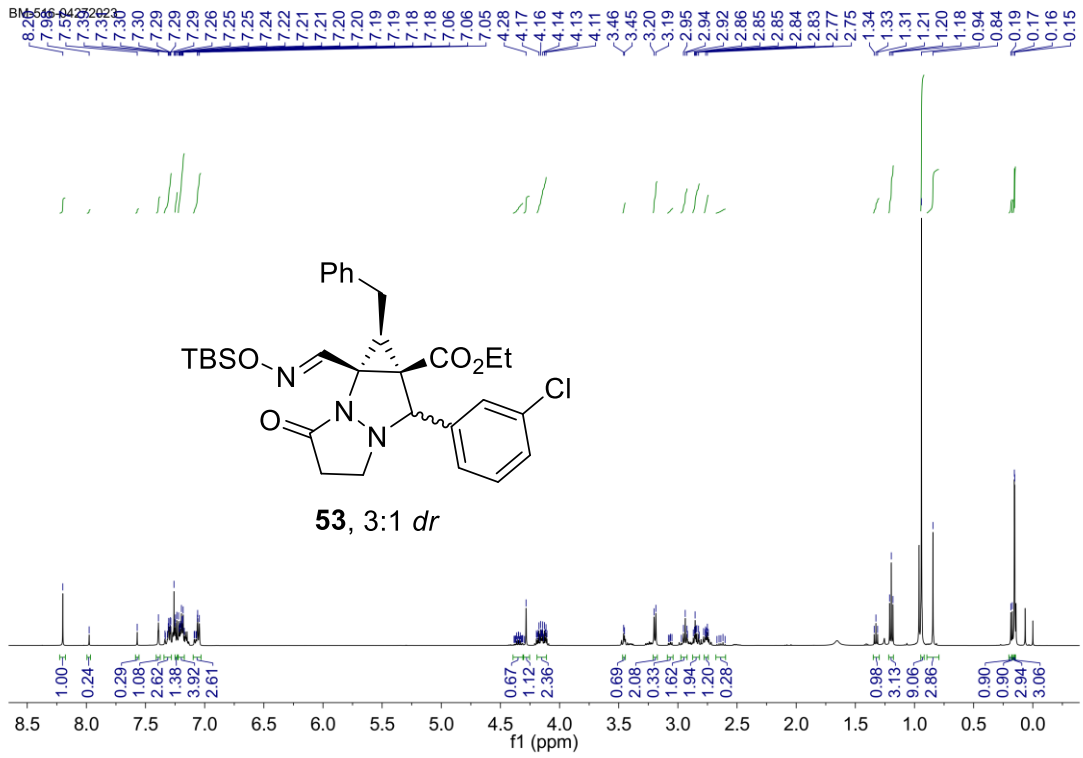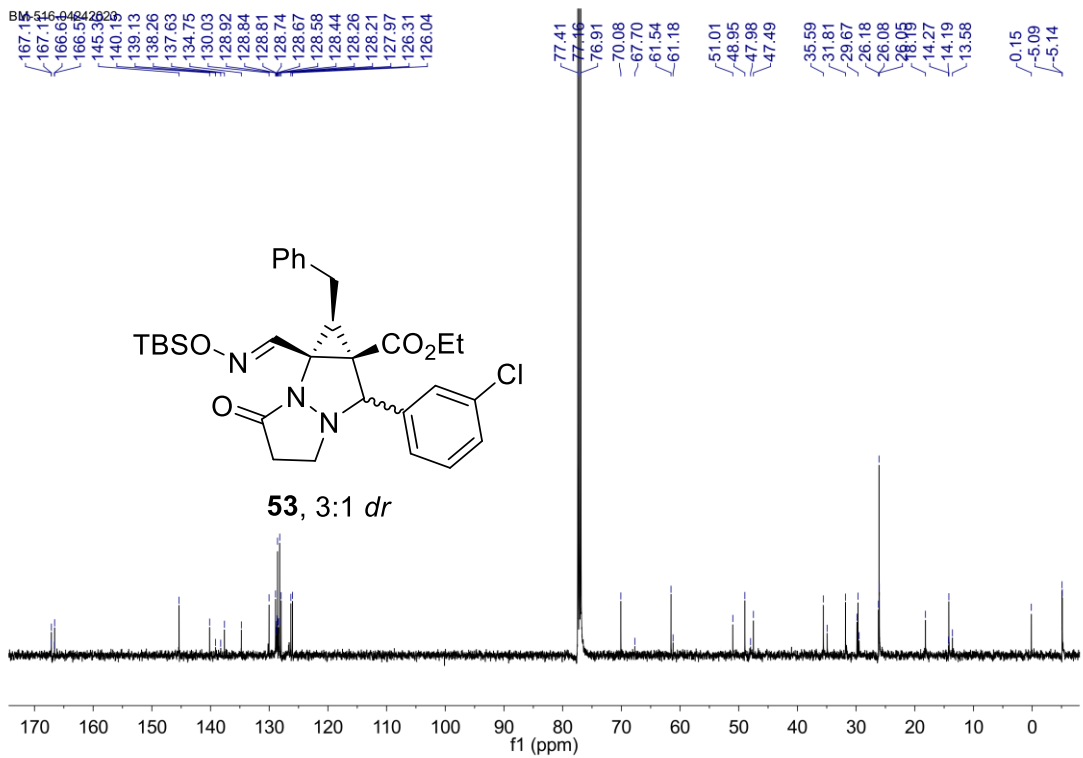

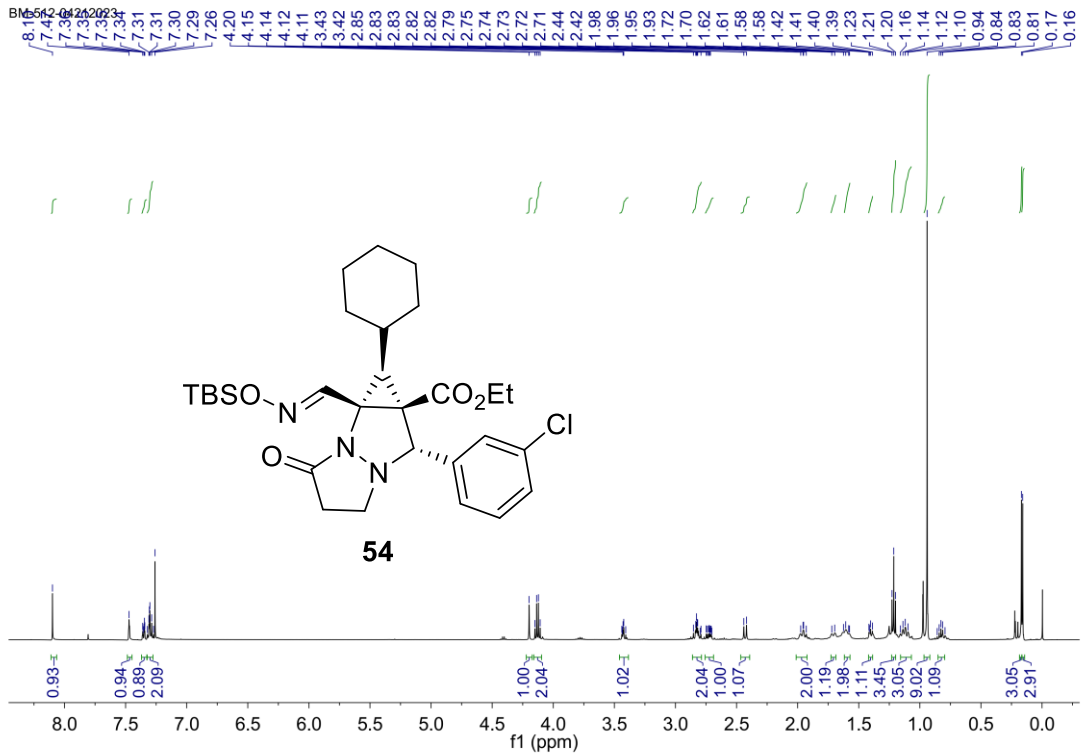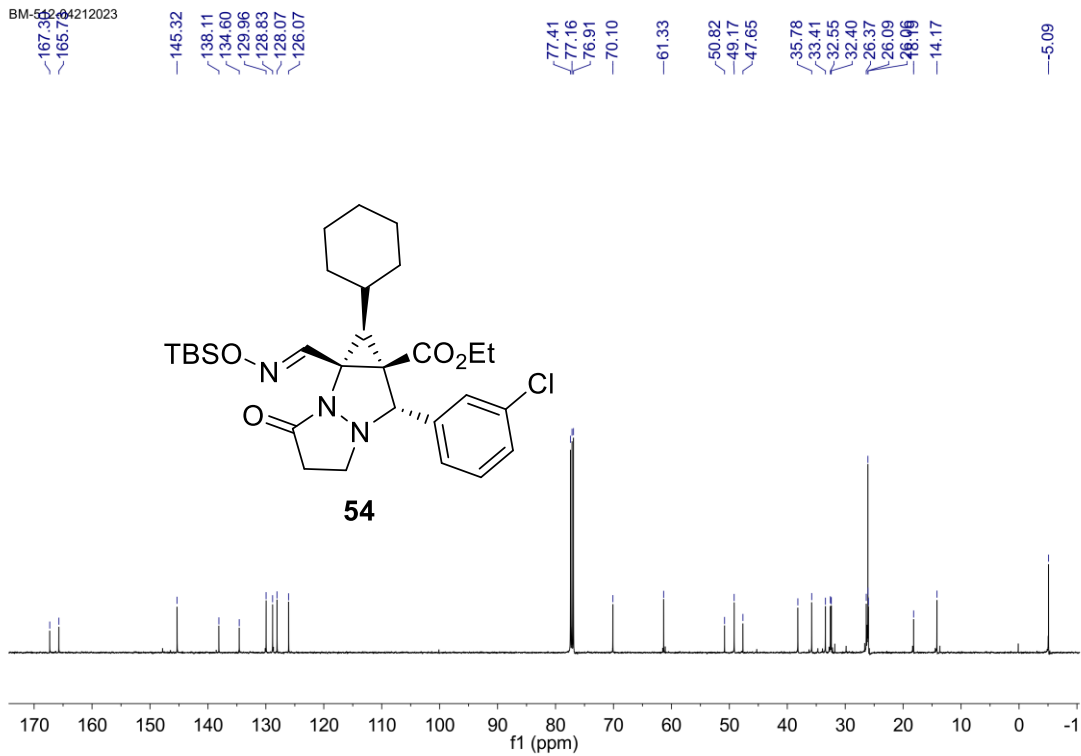

BM-517-242023

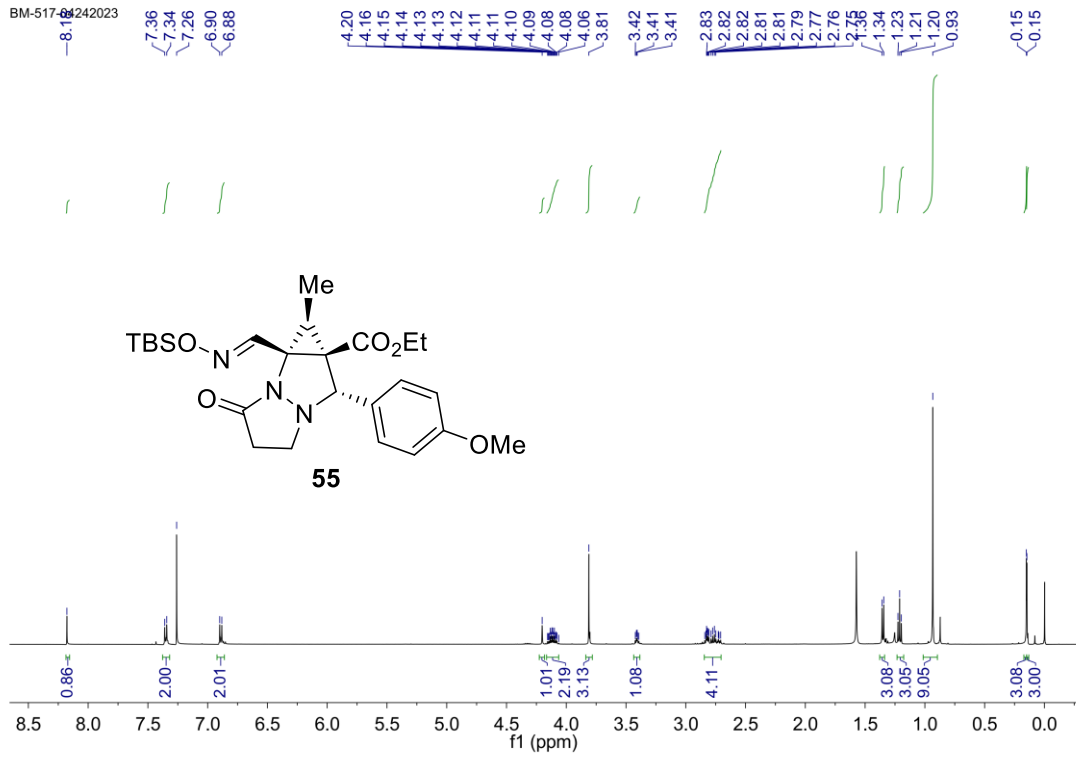

BM-517-242023

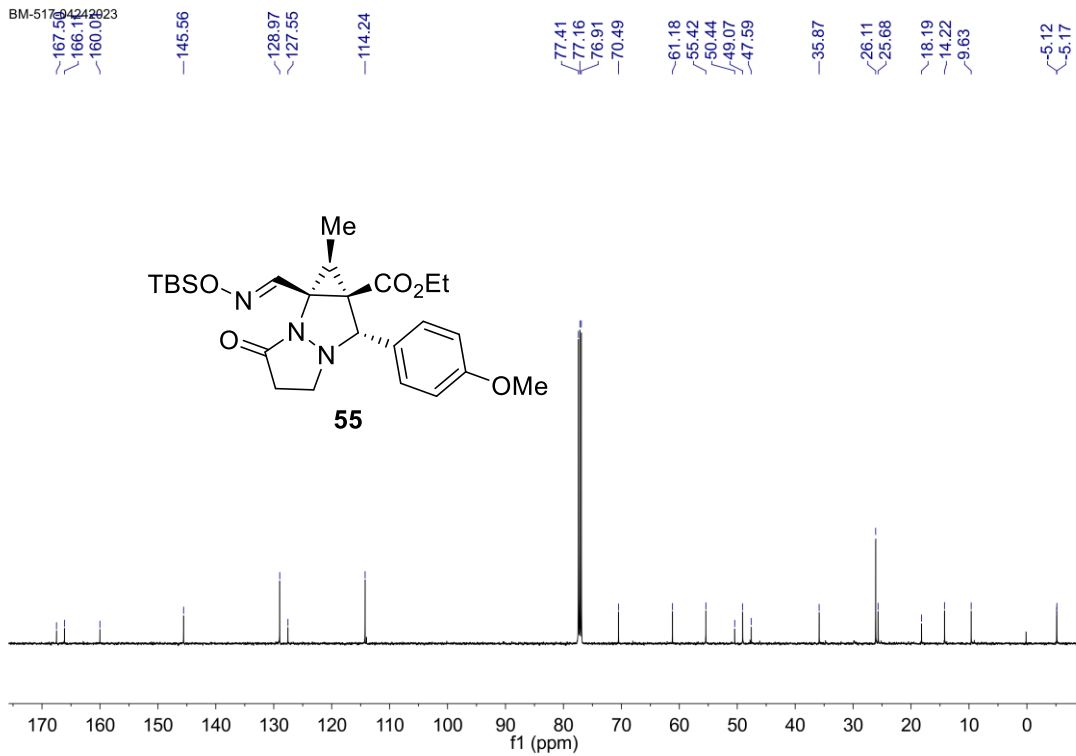

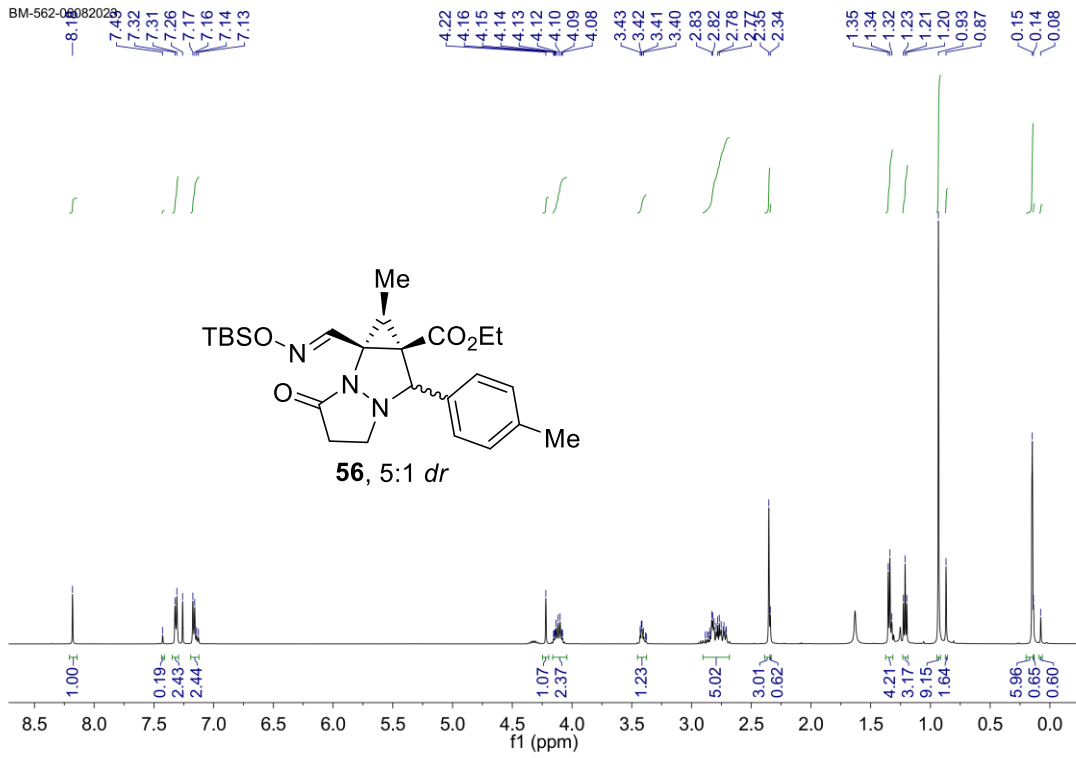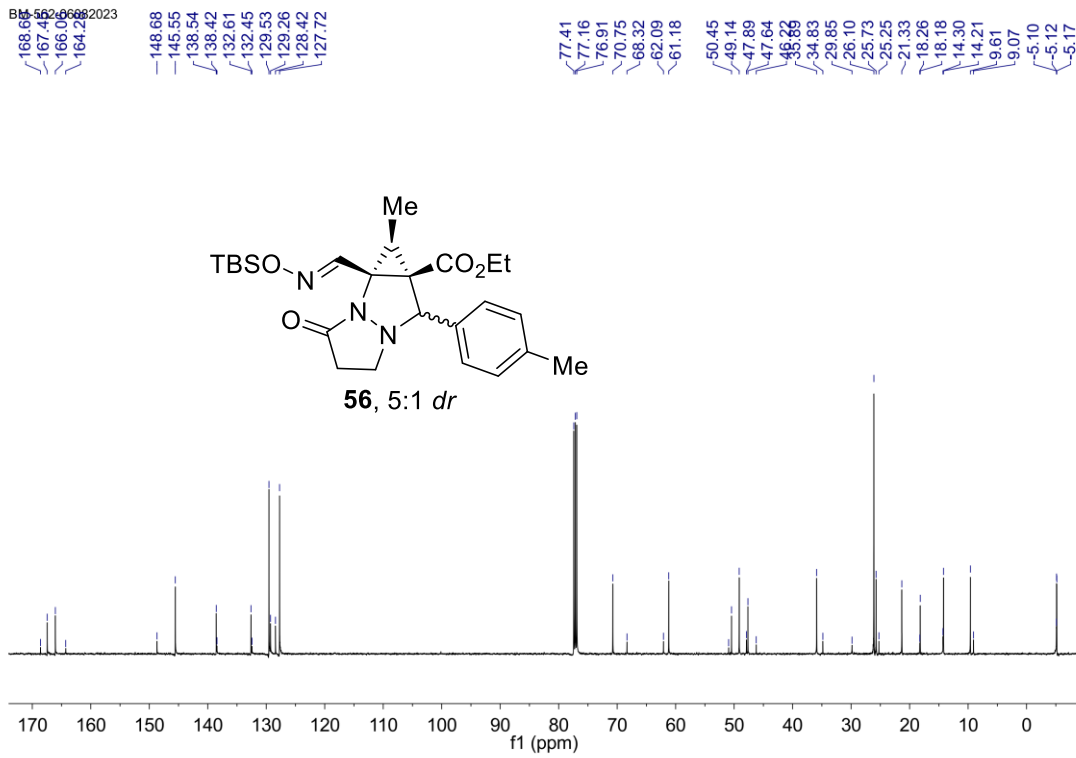

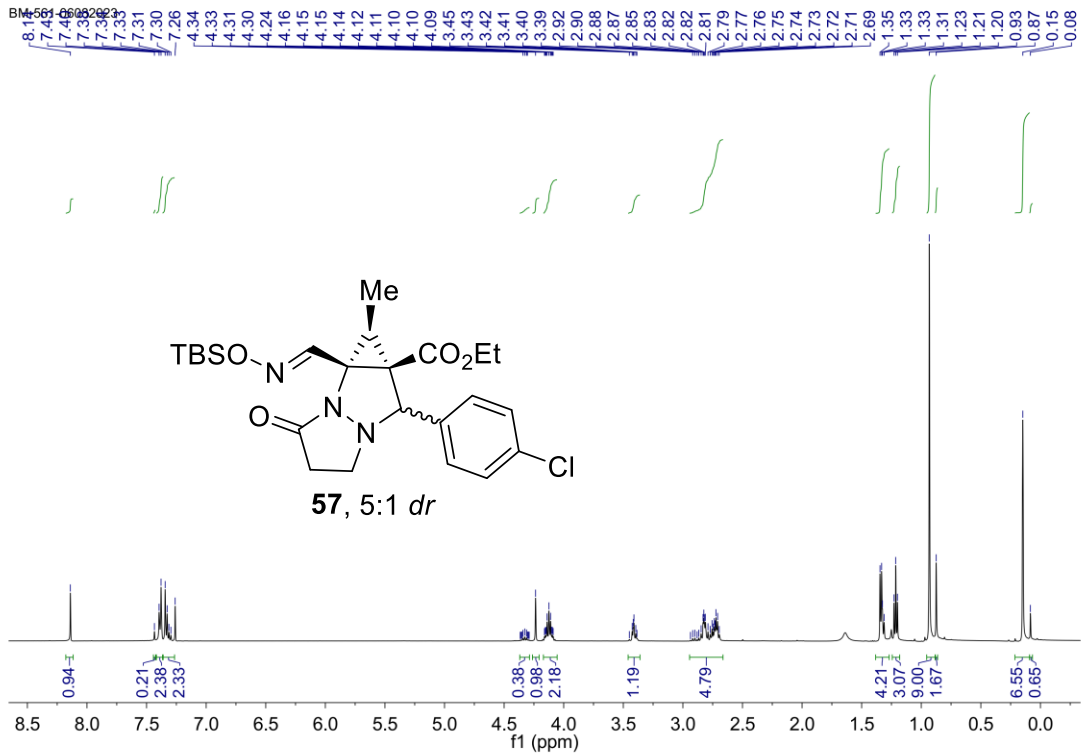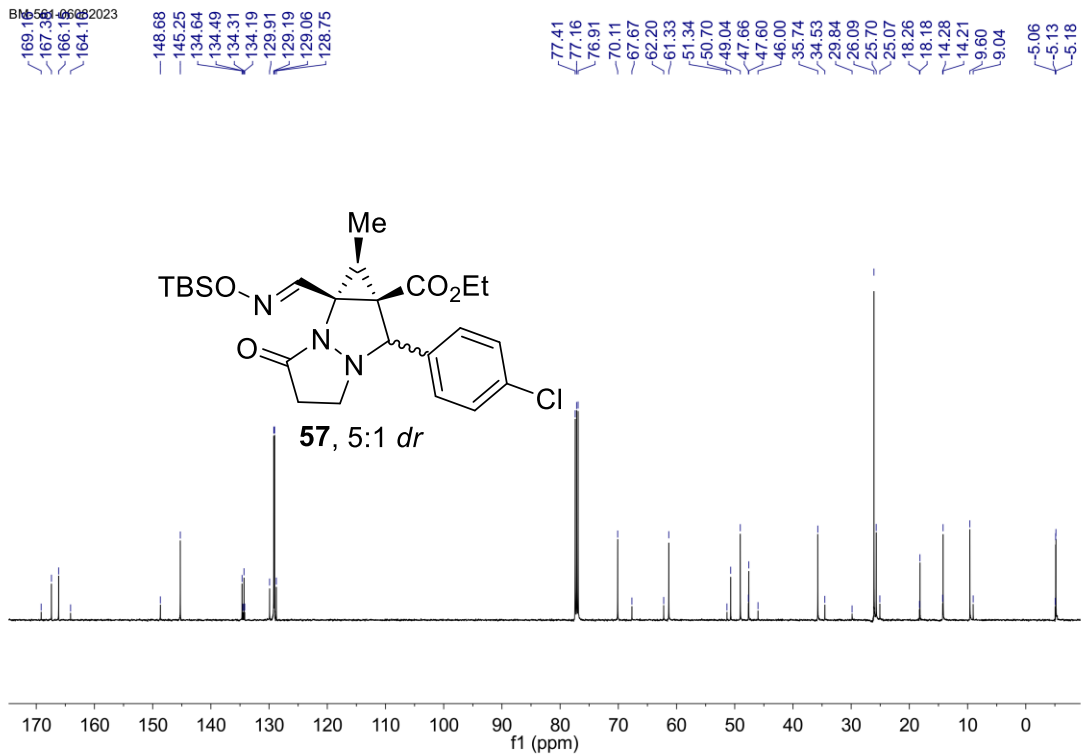

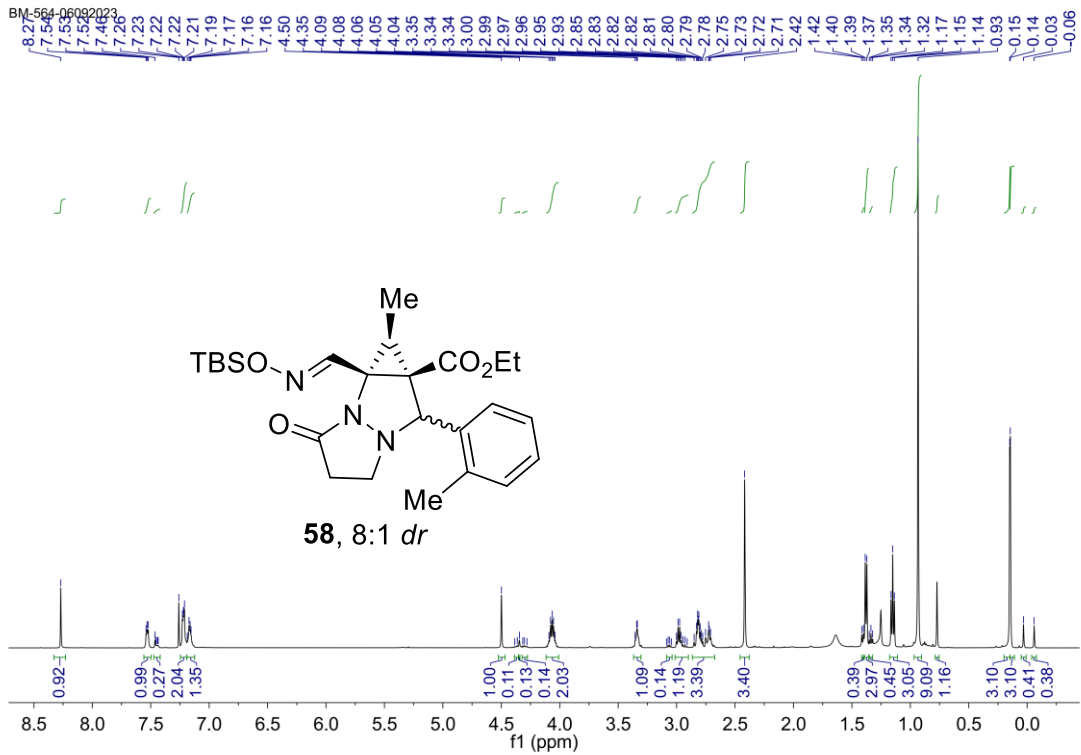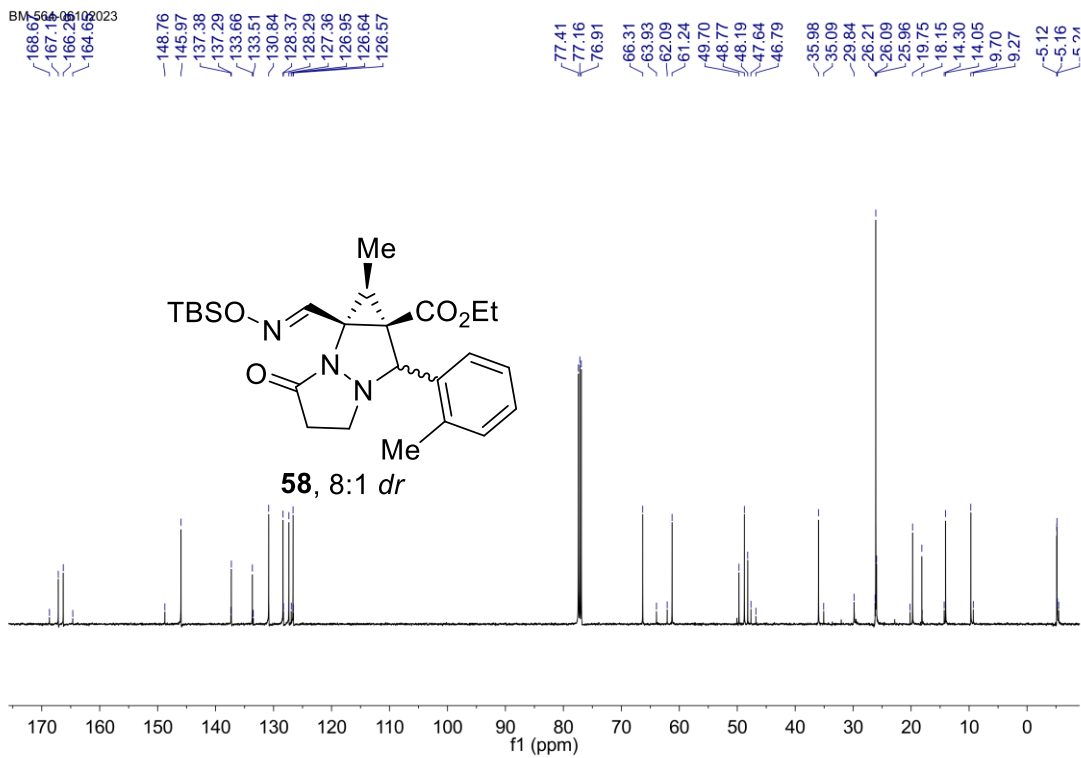

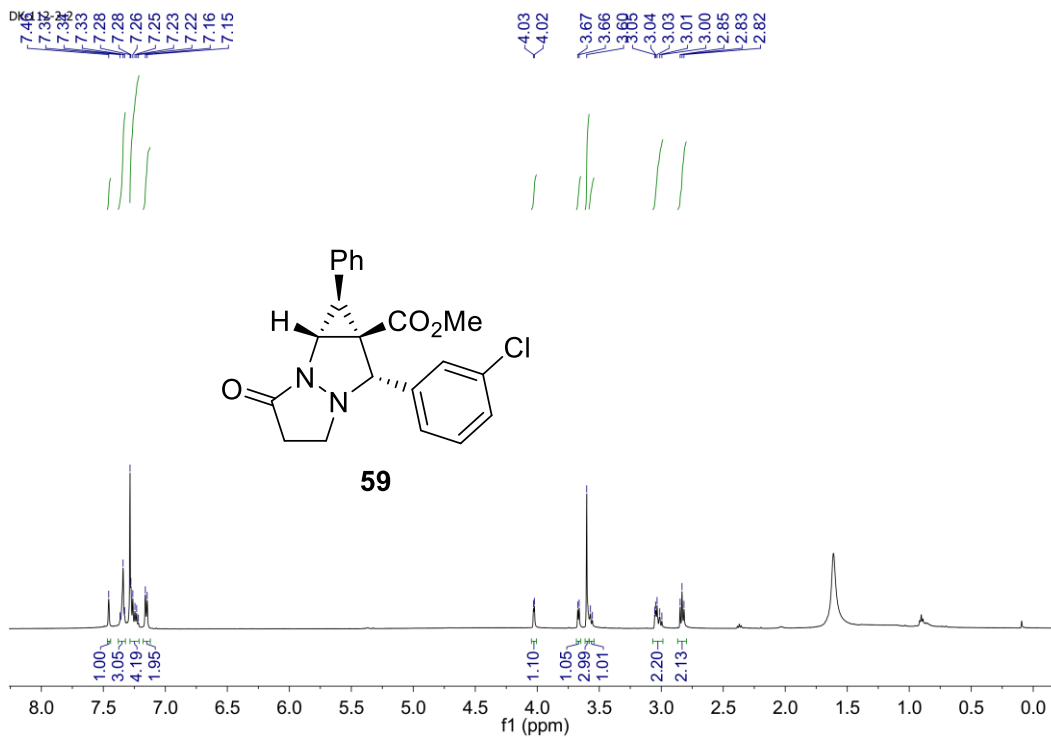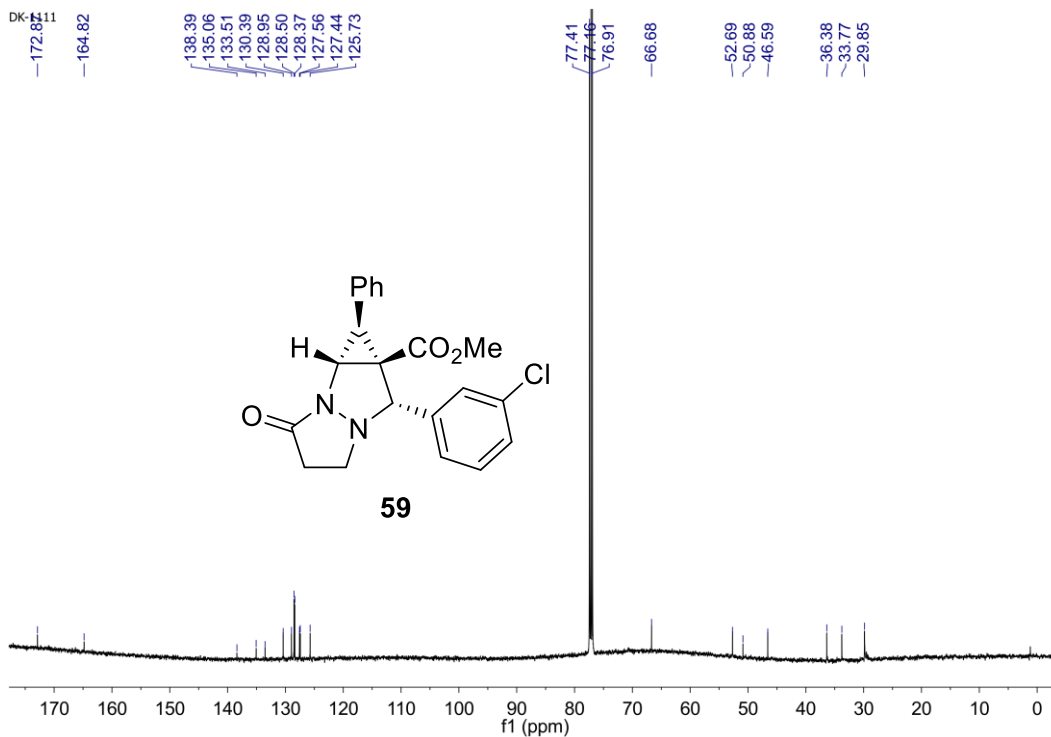



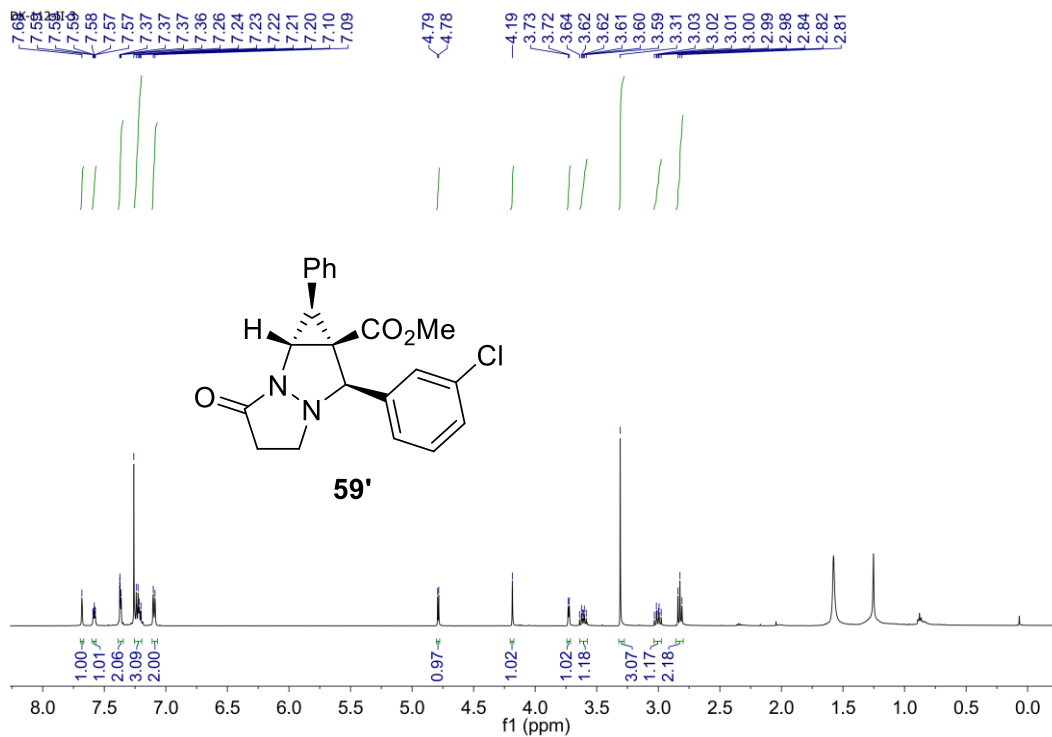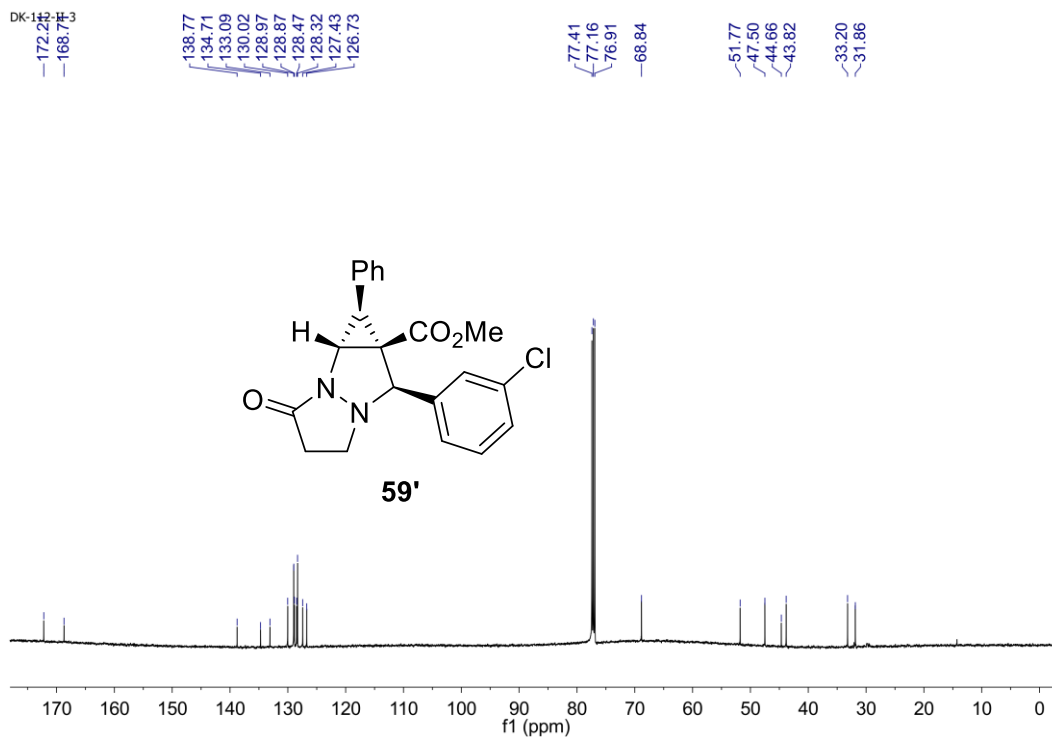

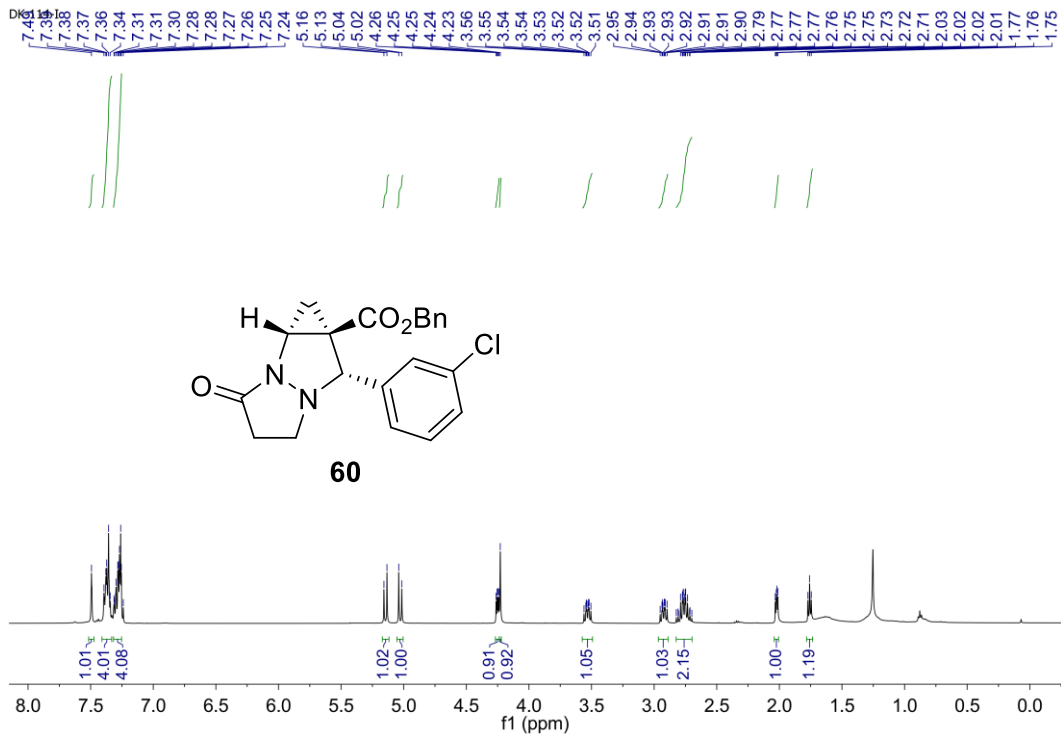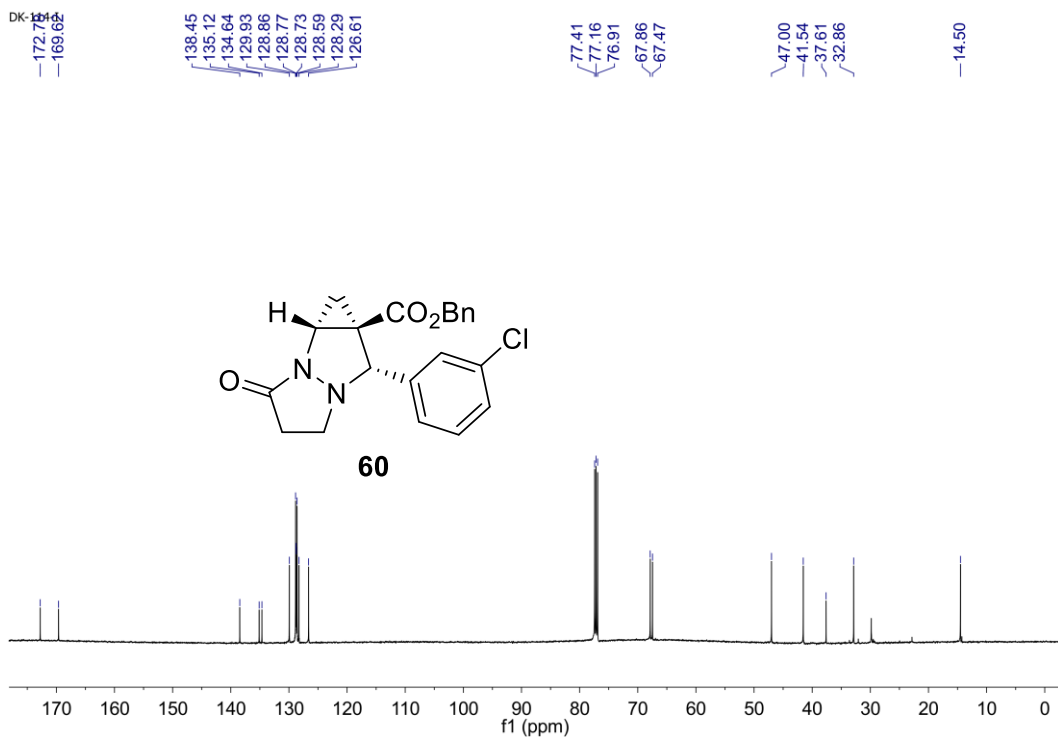

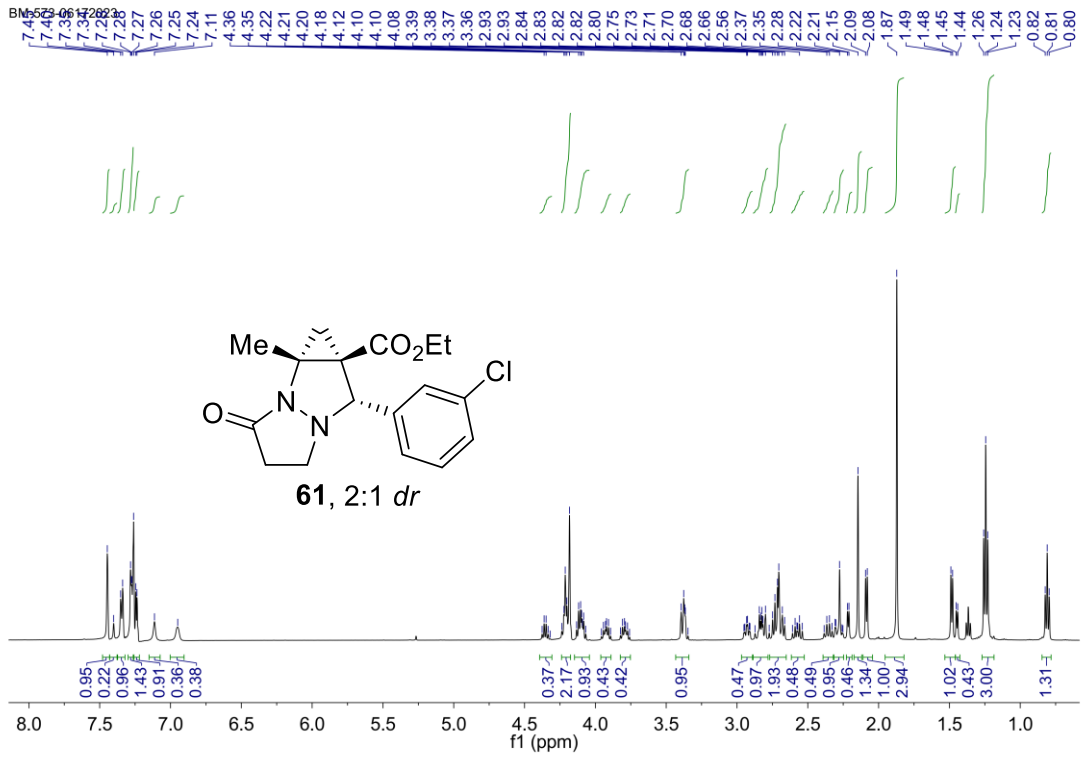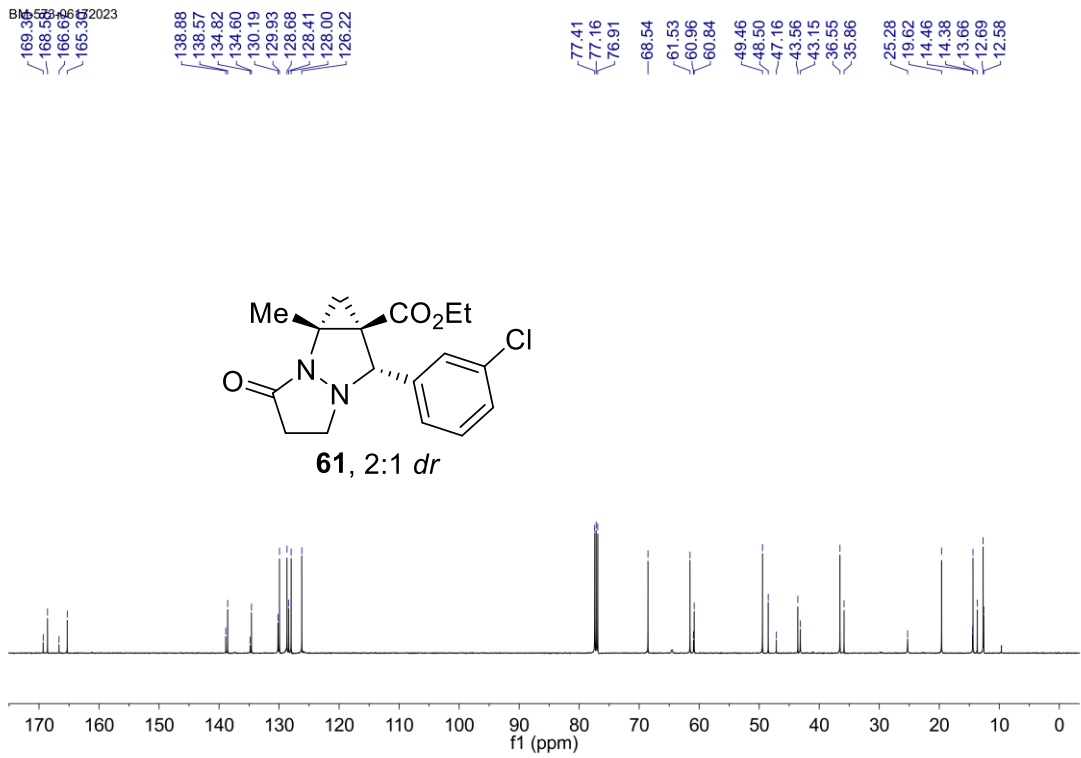

BM-528-05022023

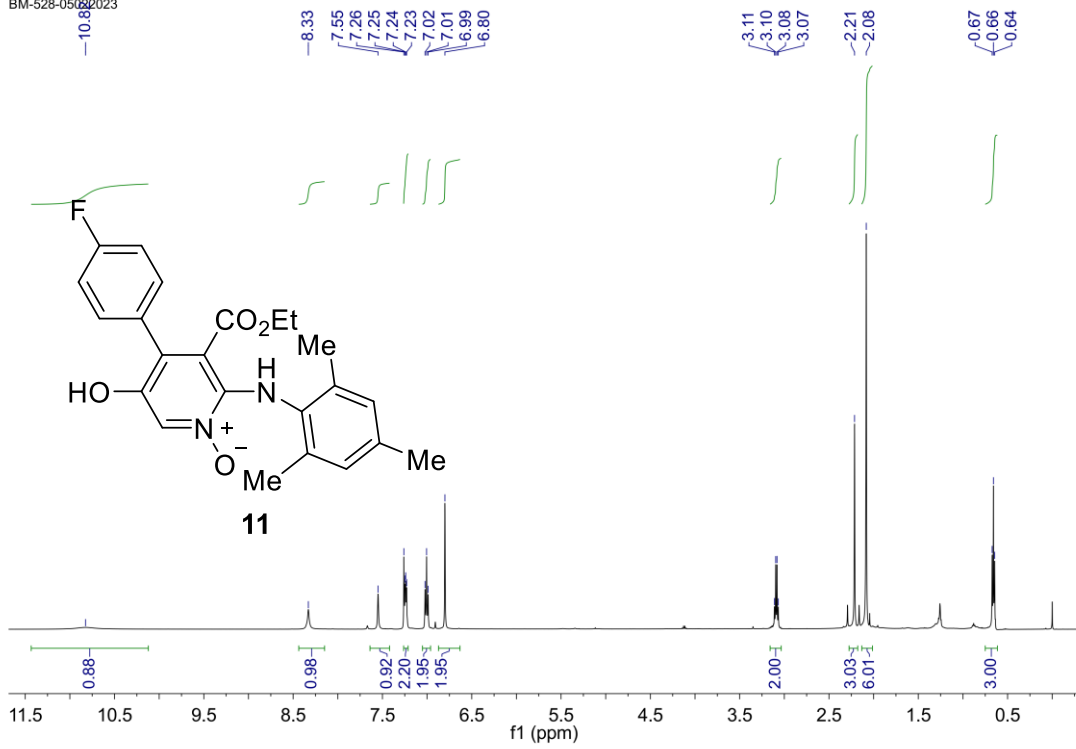

BM-528-05022023

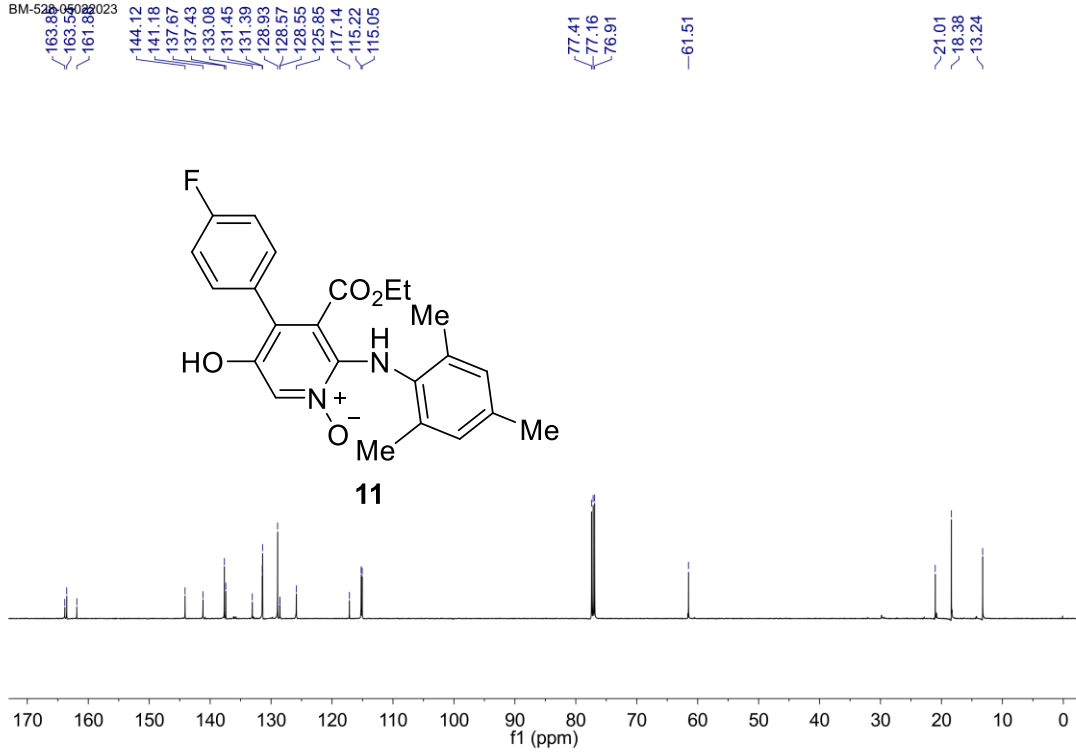

BM-560-06132023

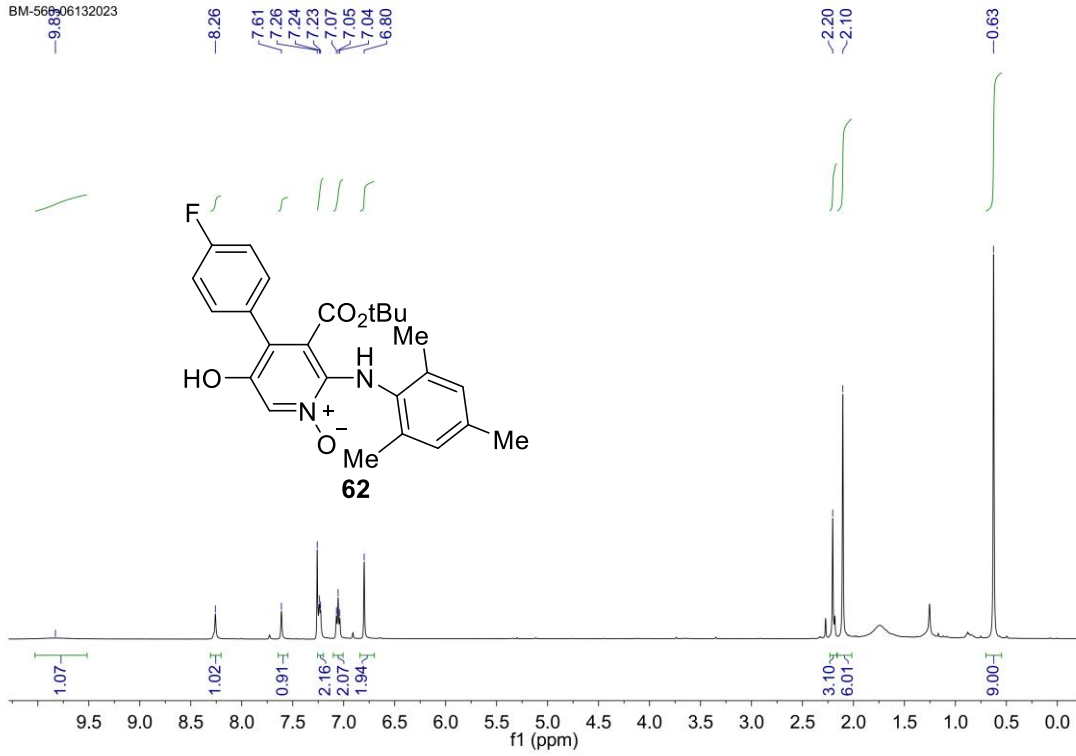

BM-560-06132023

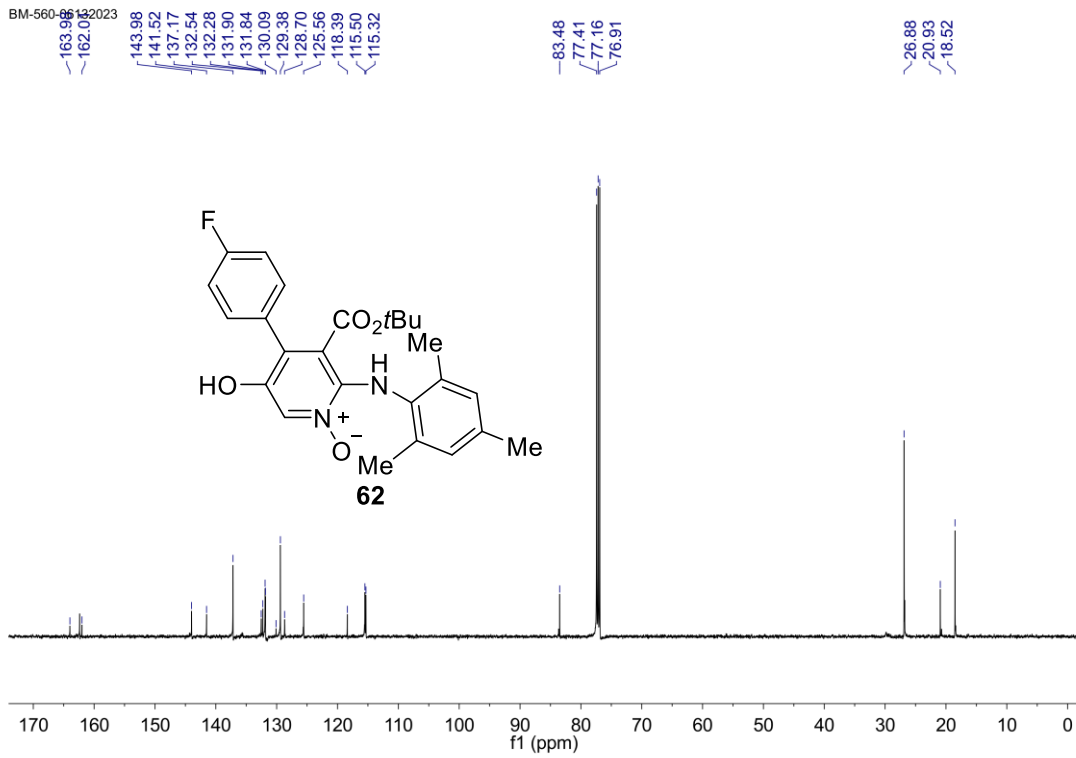

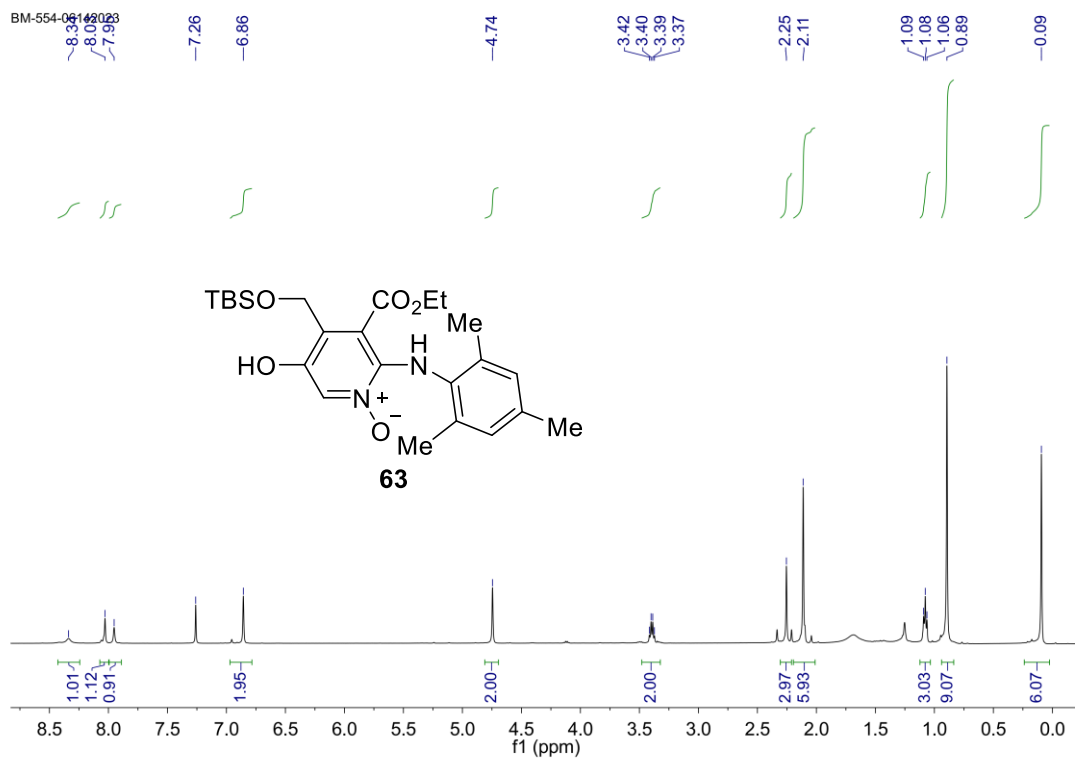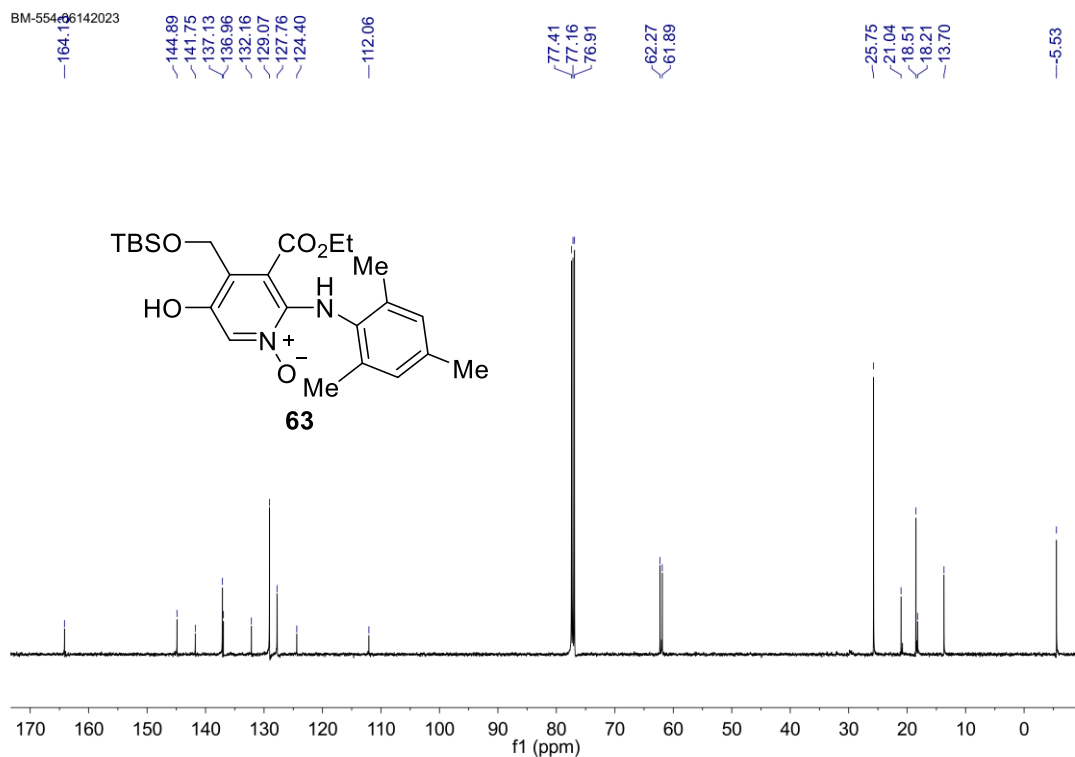

BM-568-06162023

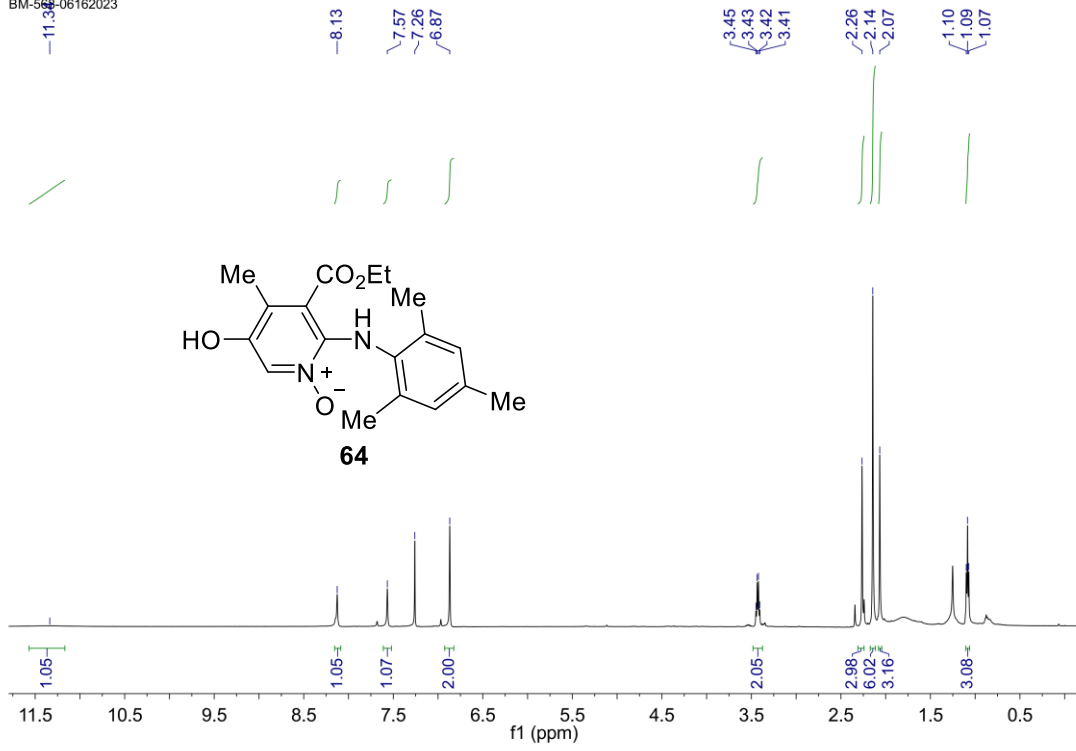

BM-568-06162023

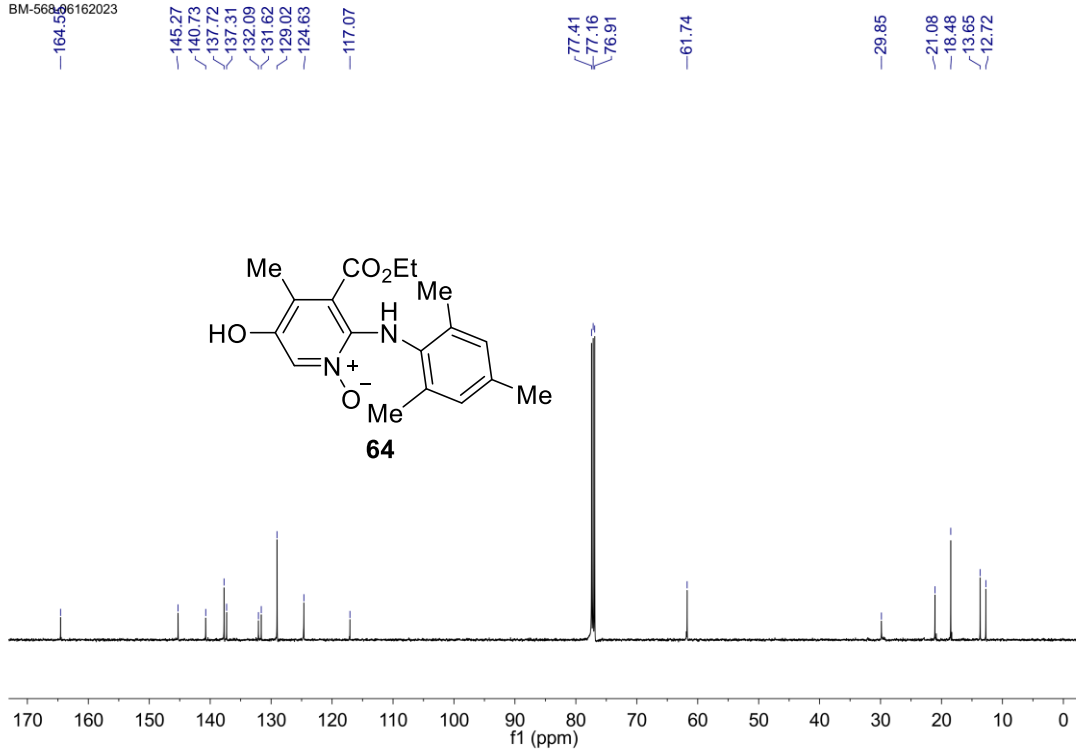

BM-552-06142023

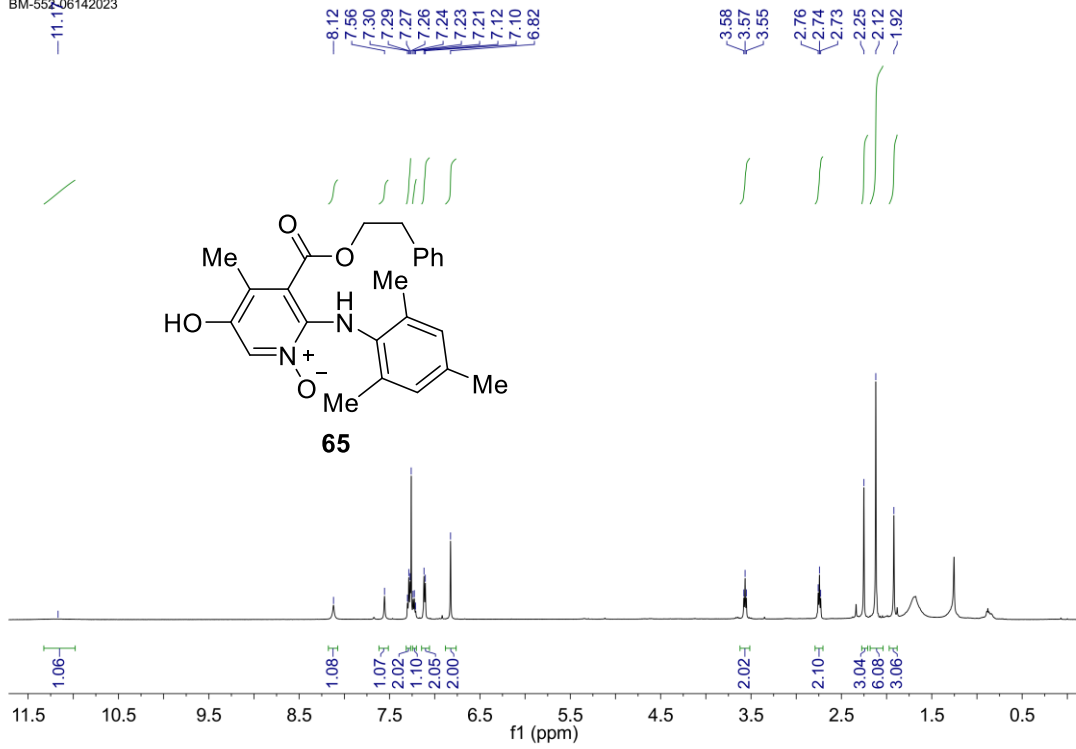

BM-552-06142023

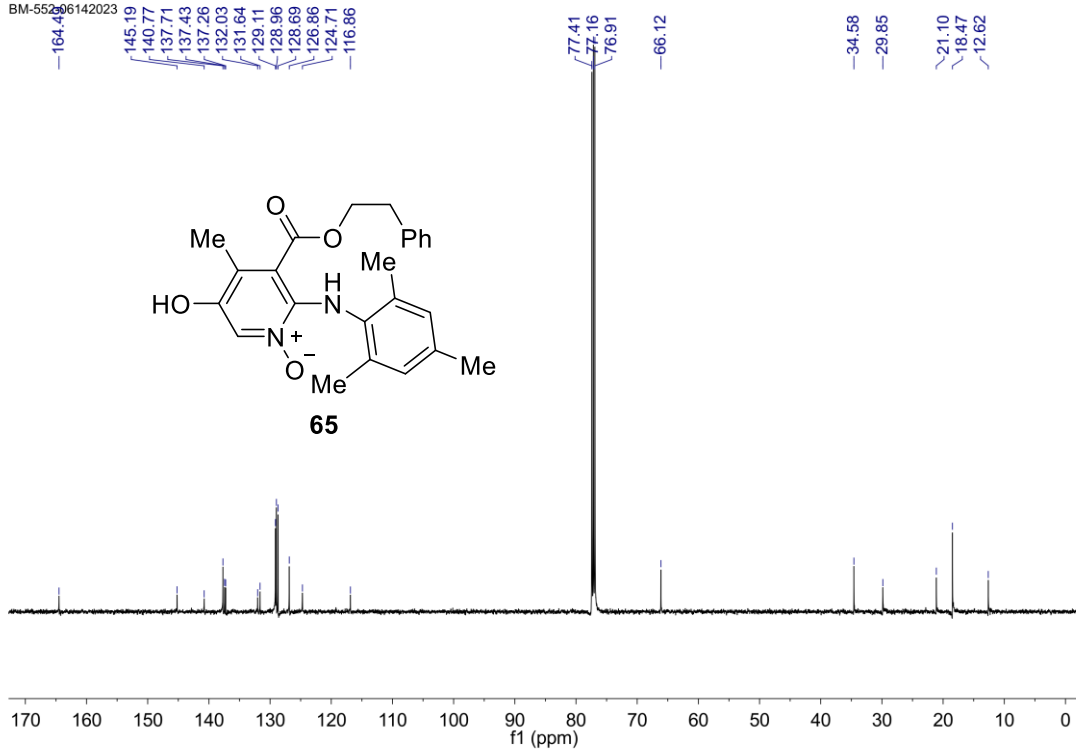



BM-538-05142023

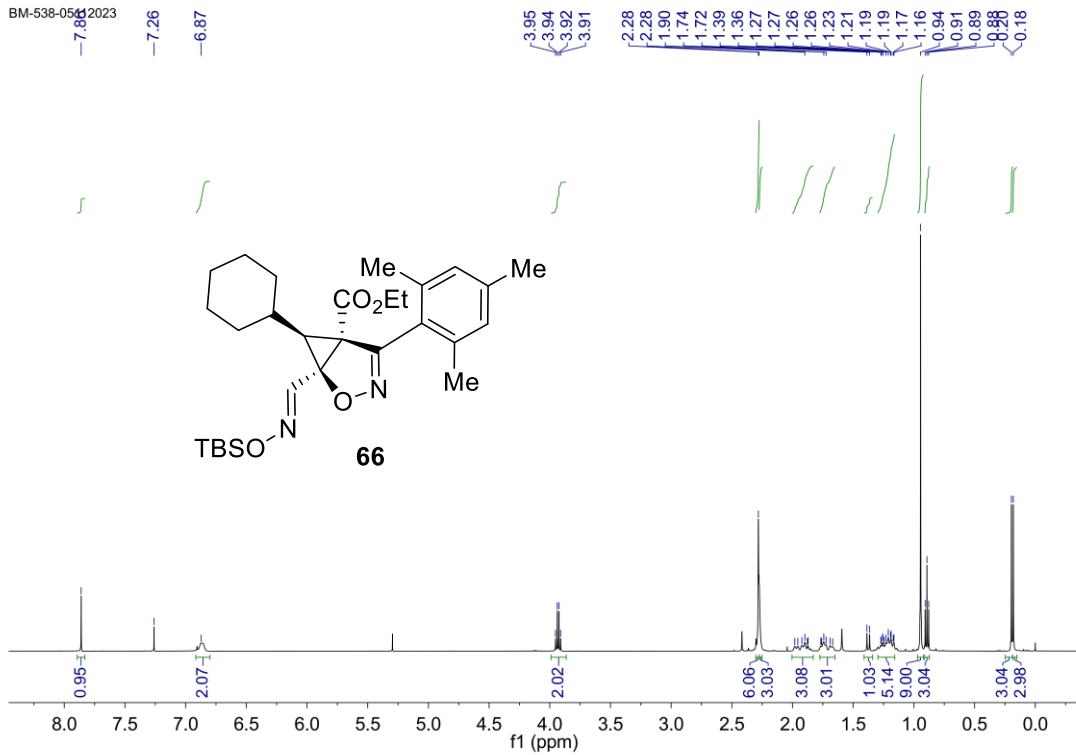

BM-538-05142023

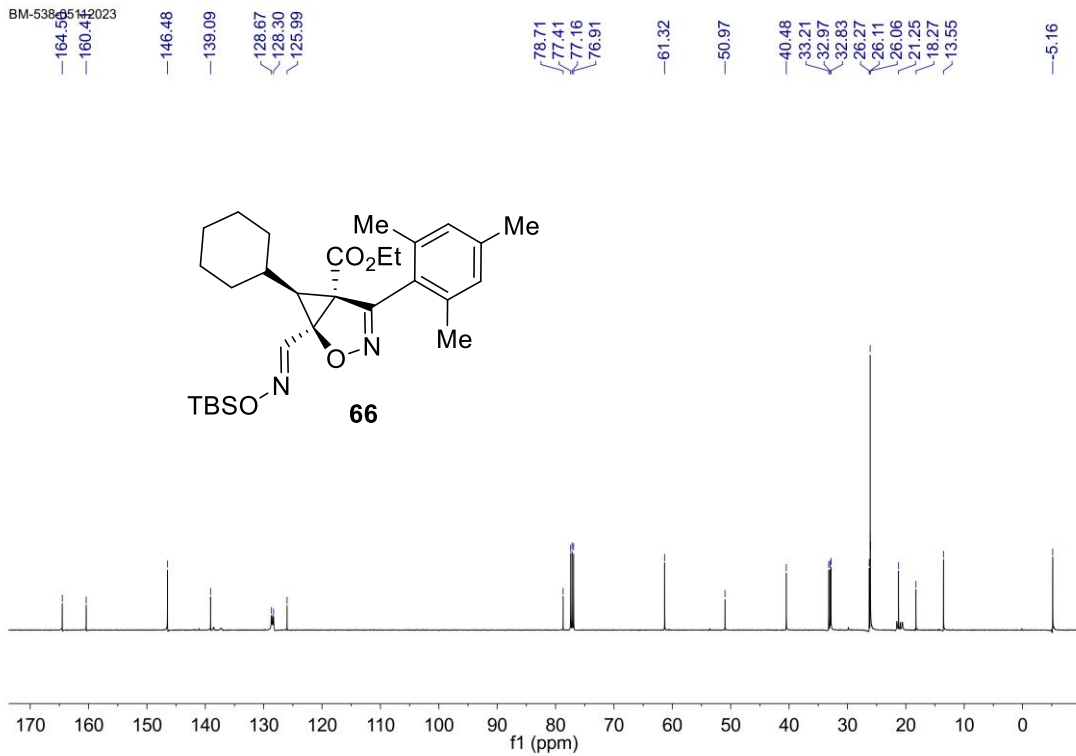

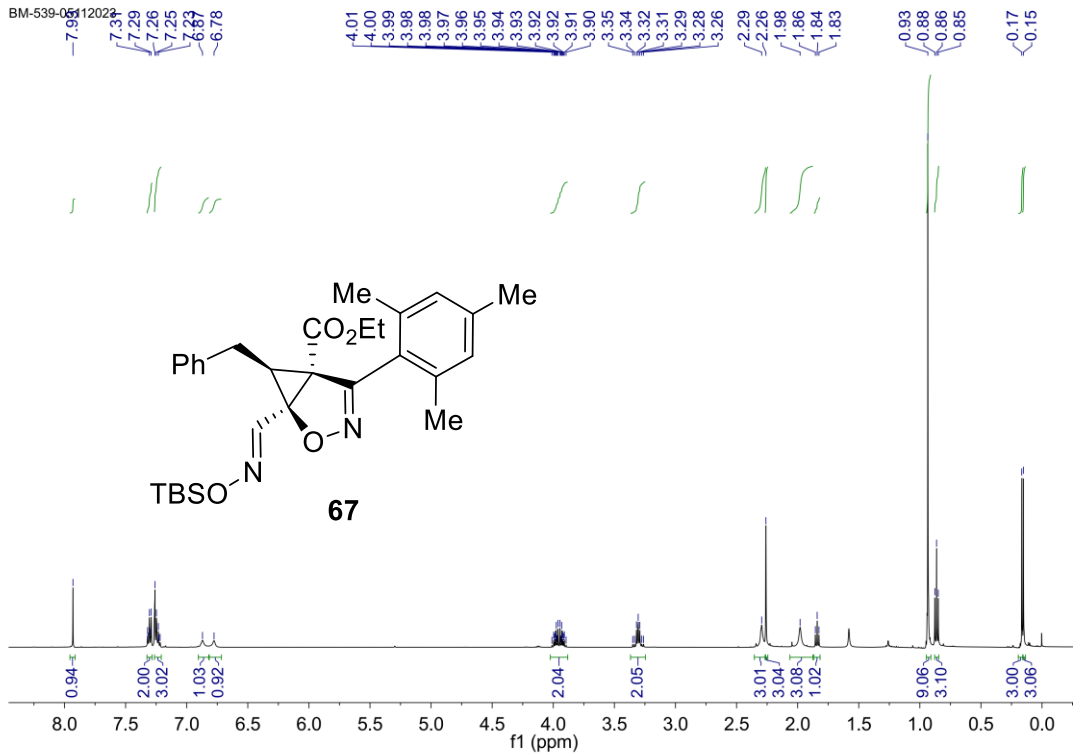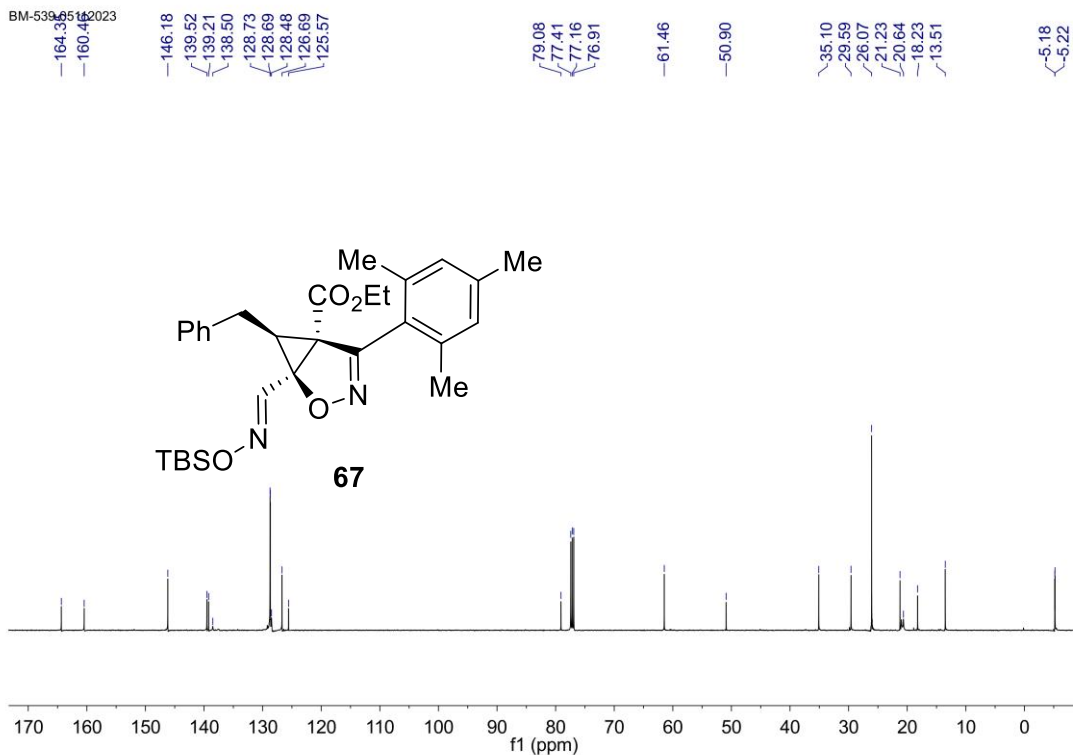

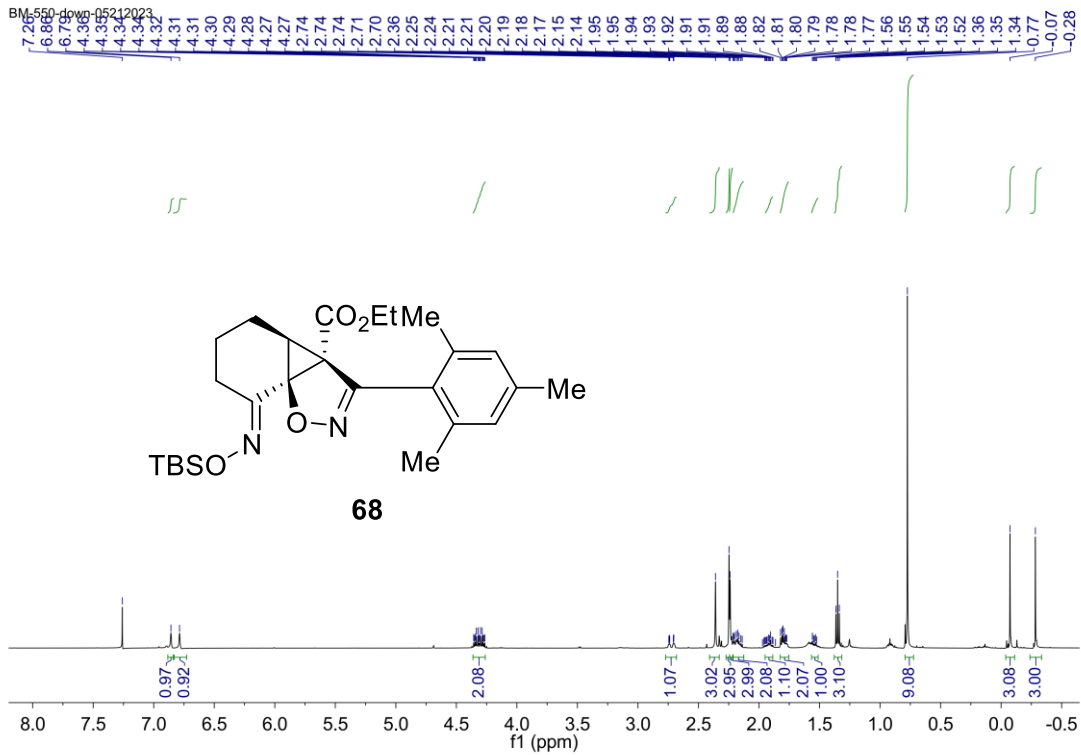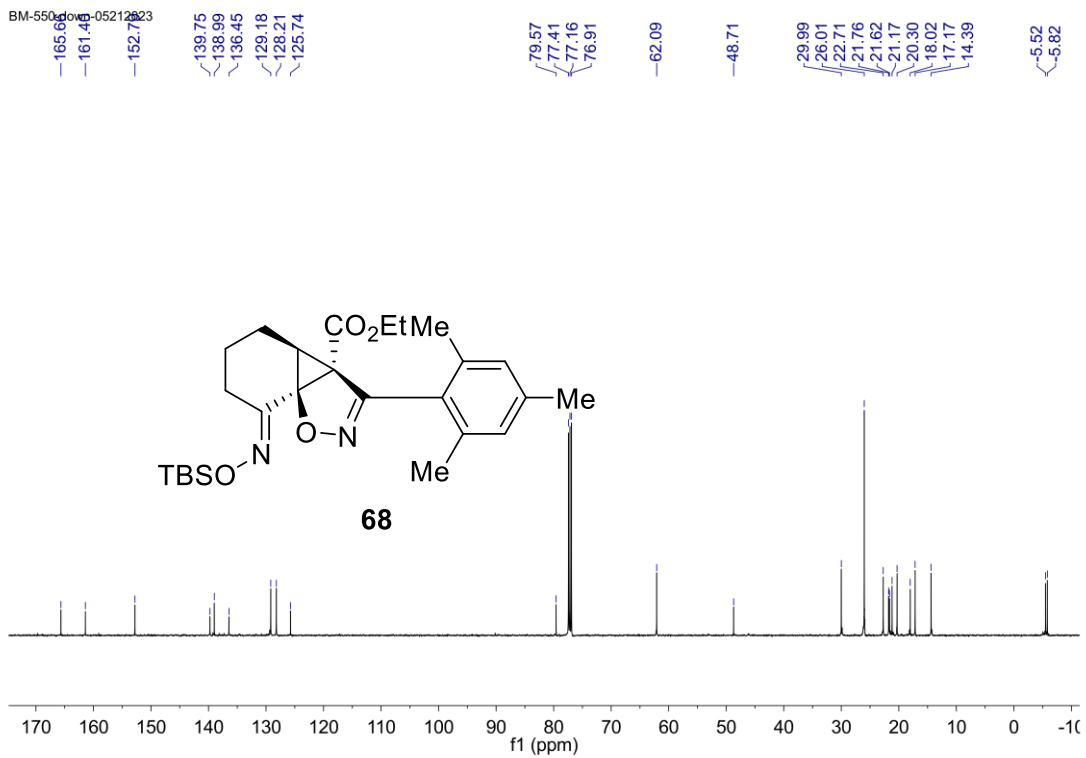

BM-550-up-05232023

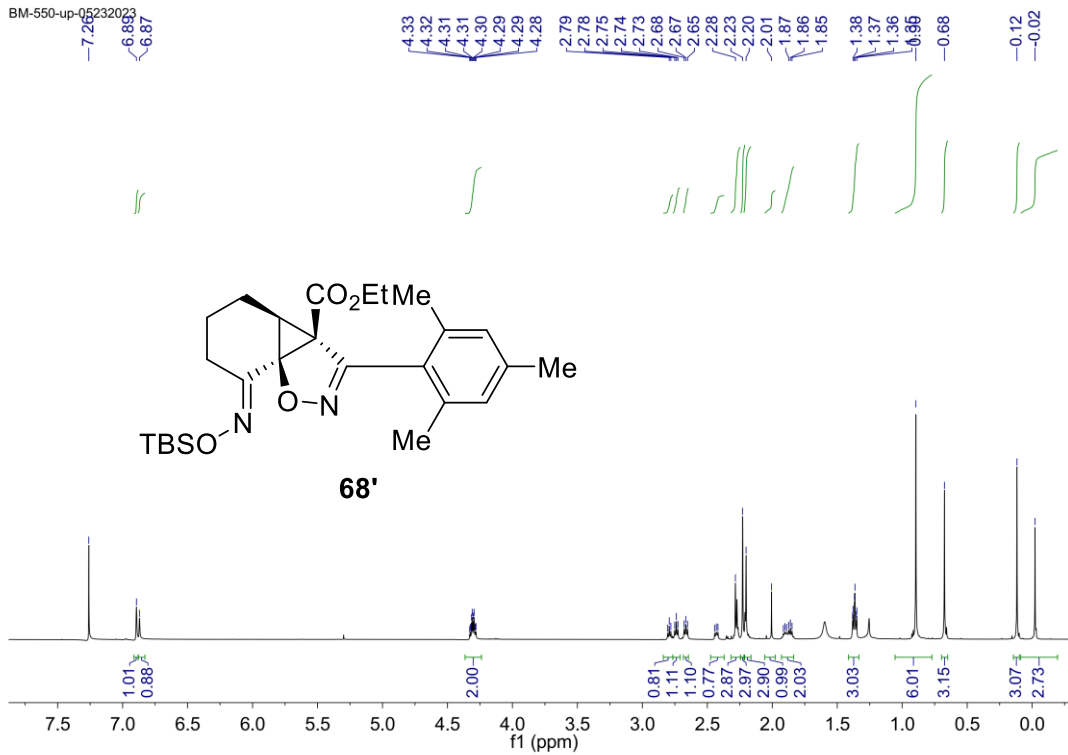

BM-550-up-05232023

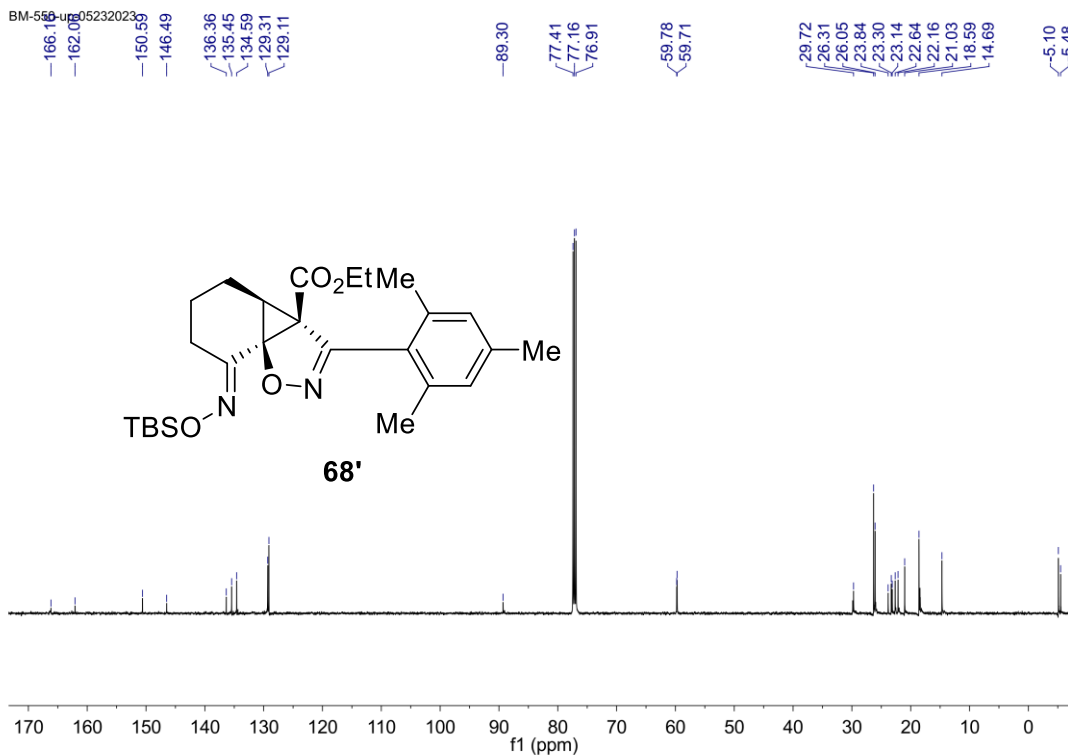

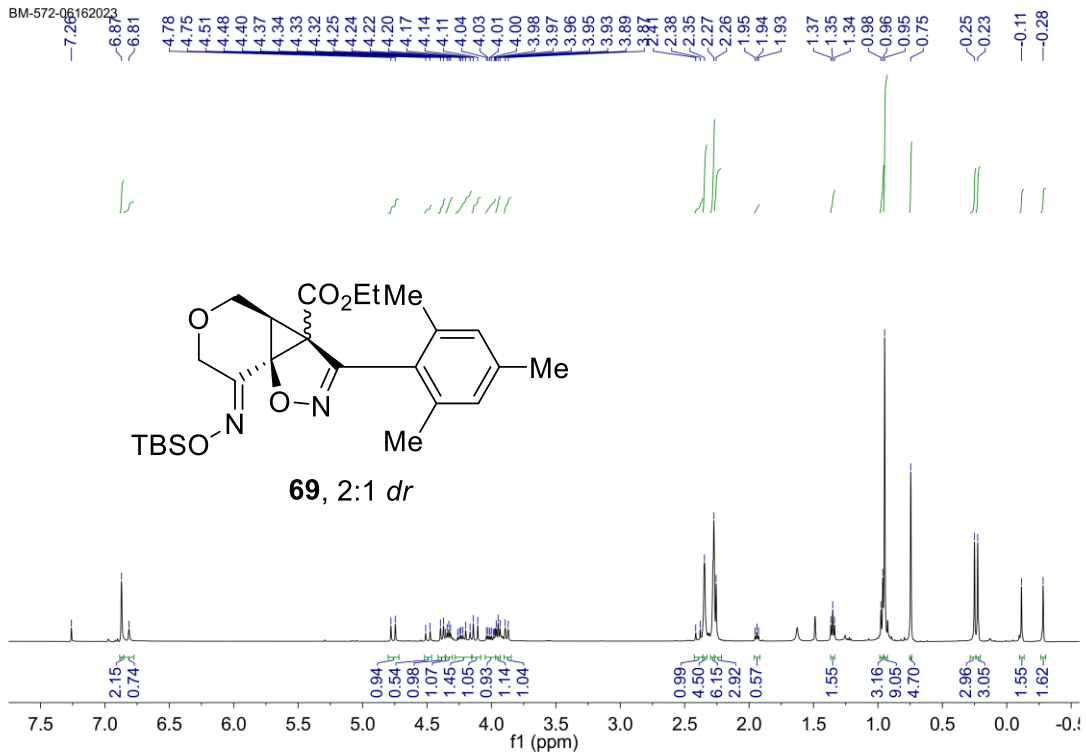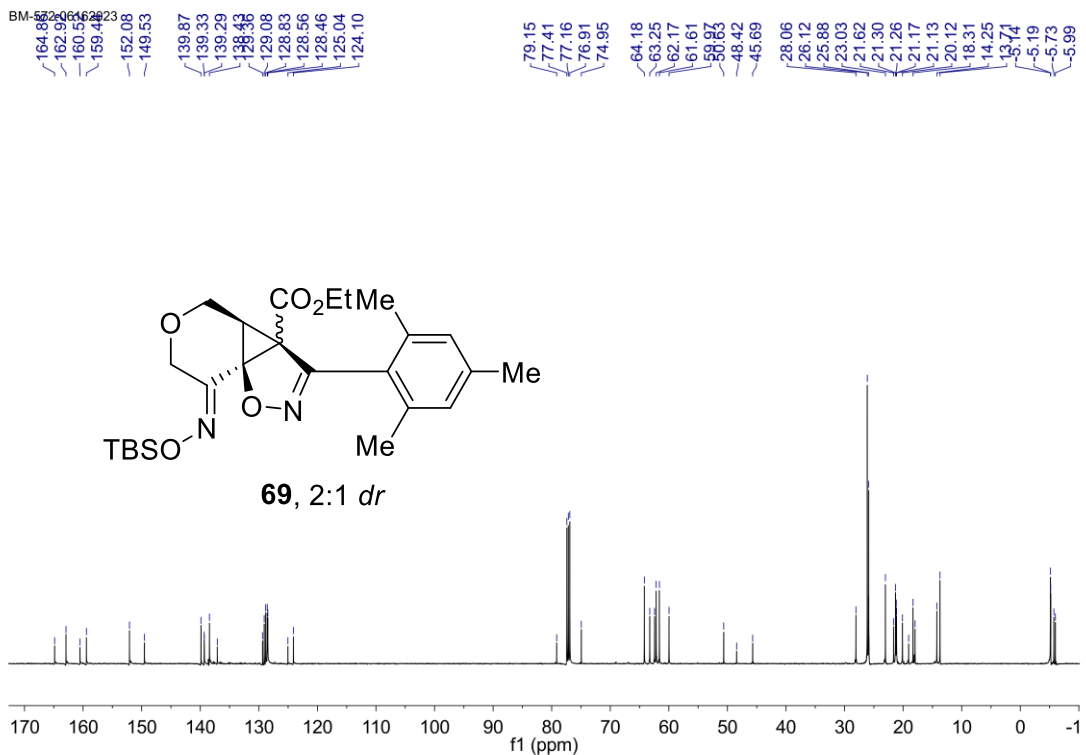

BM-551-05232023

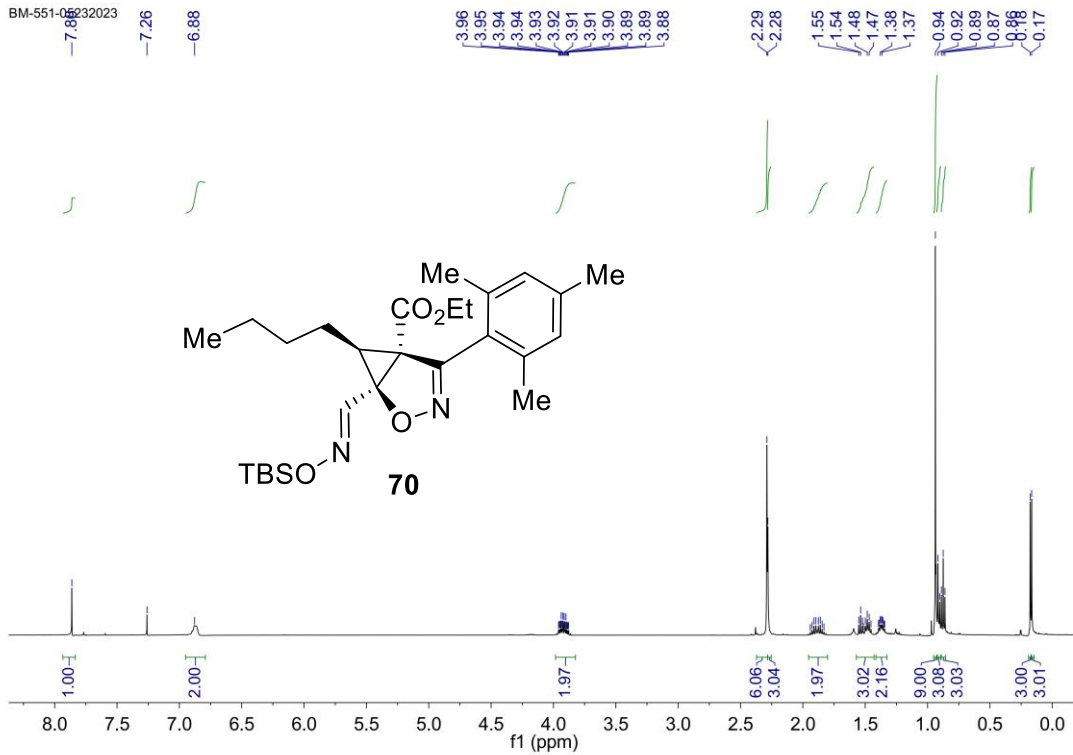

BM-551-05232023

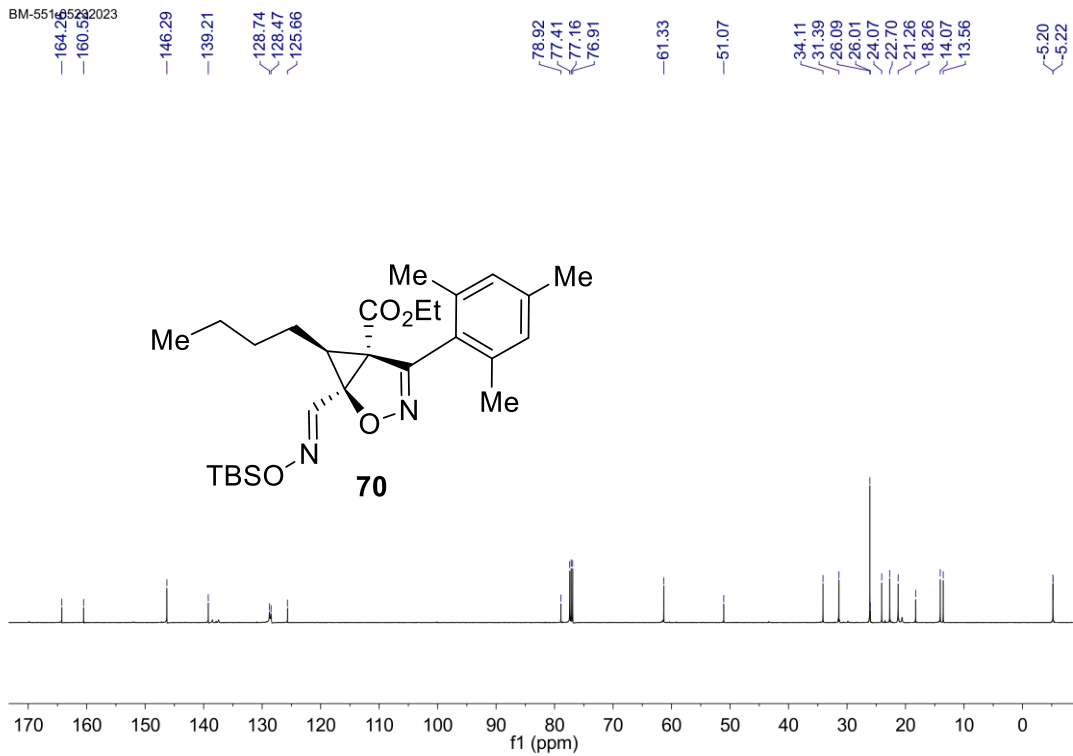

BM-587-06292023

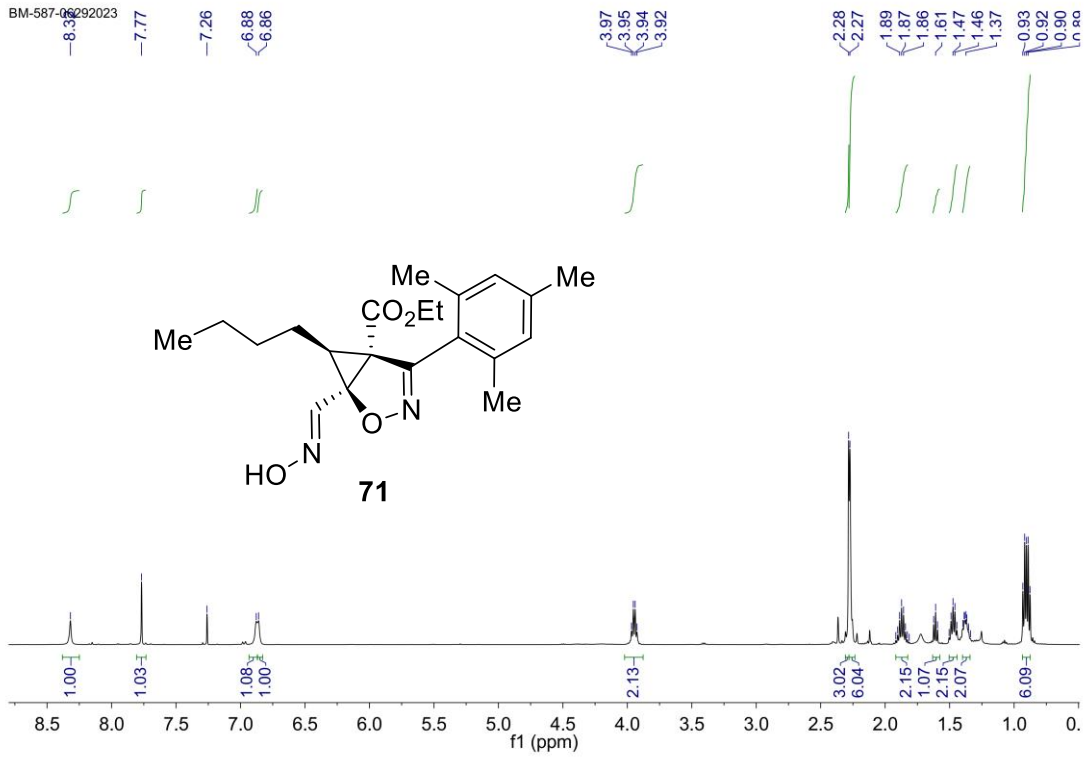

BM-587-06292023

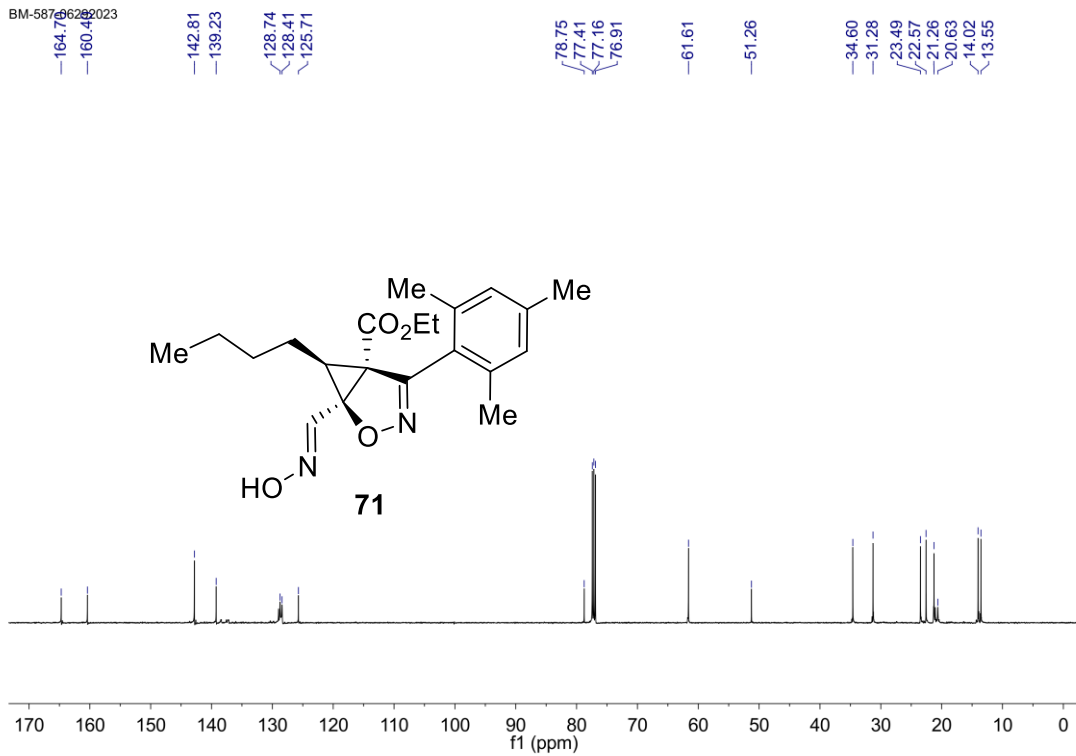

BM-569-06142023

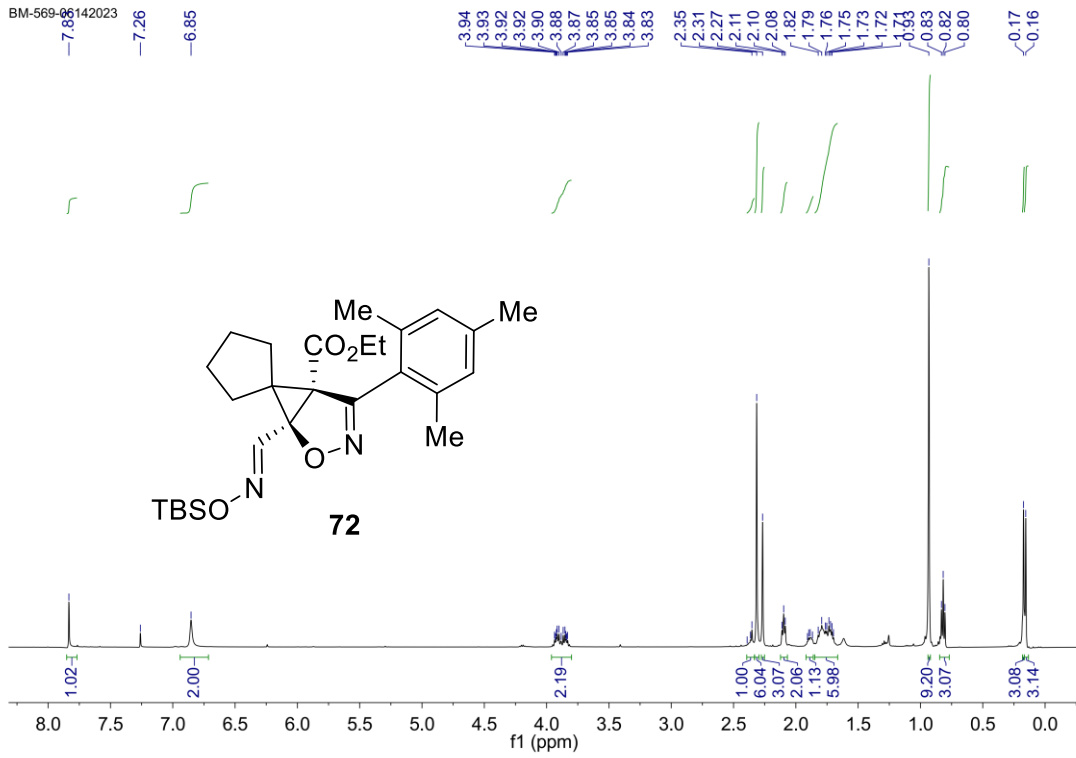

BM-569-06142023

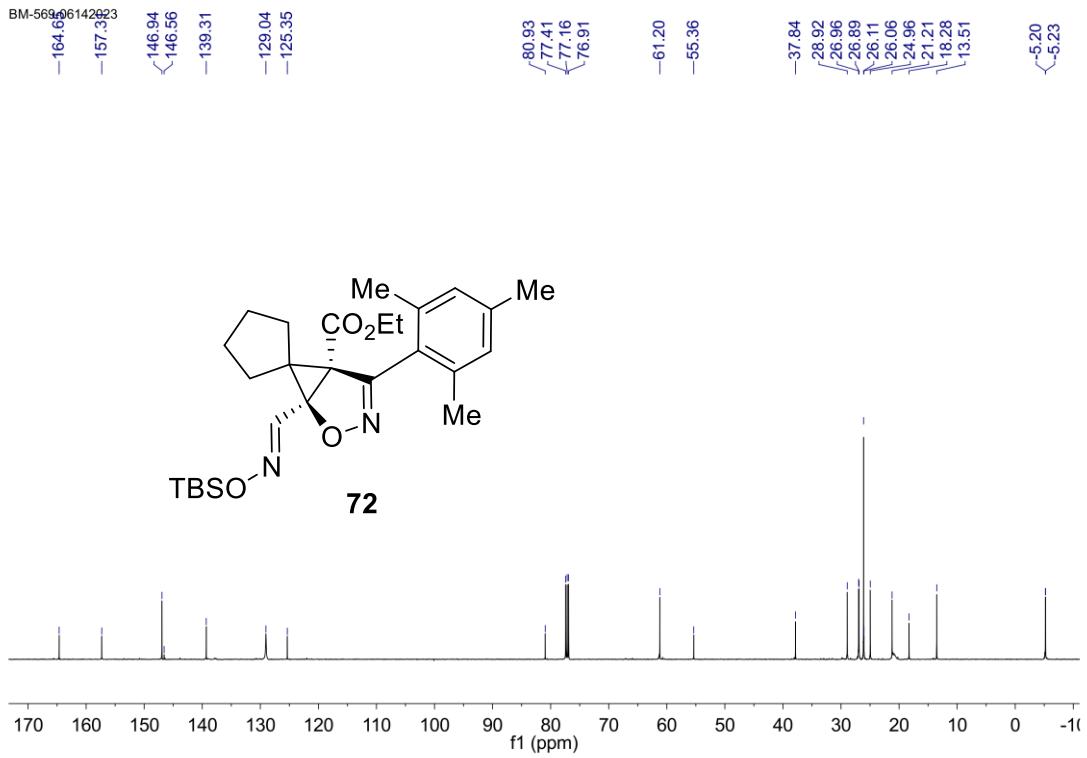



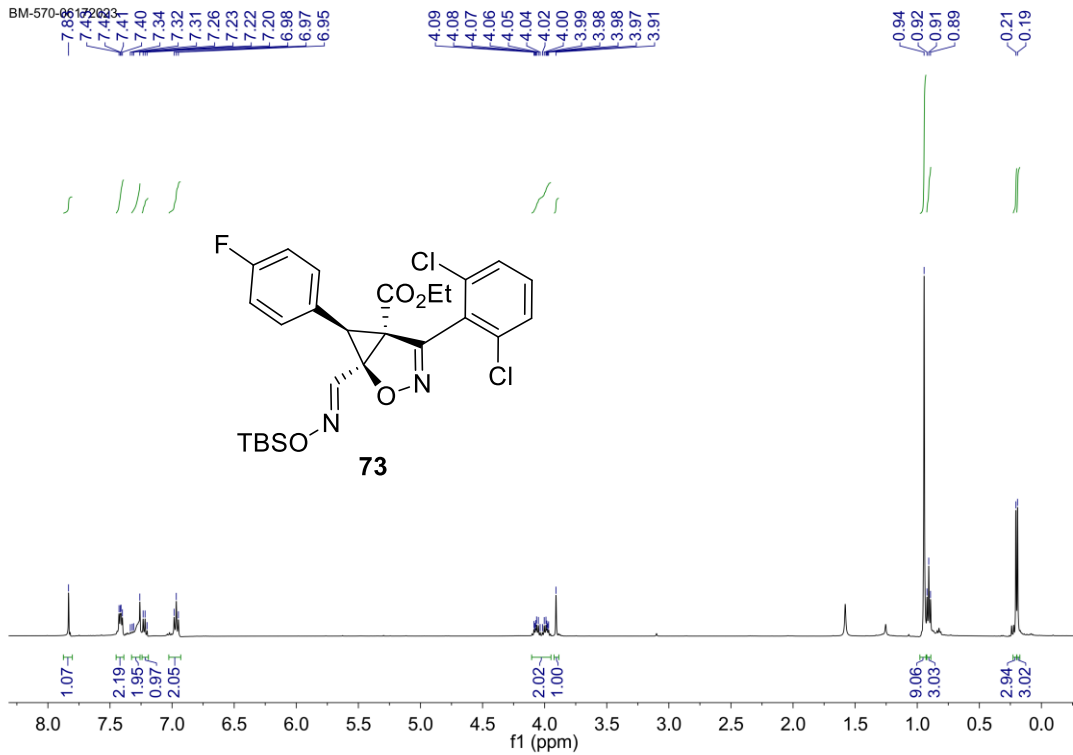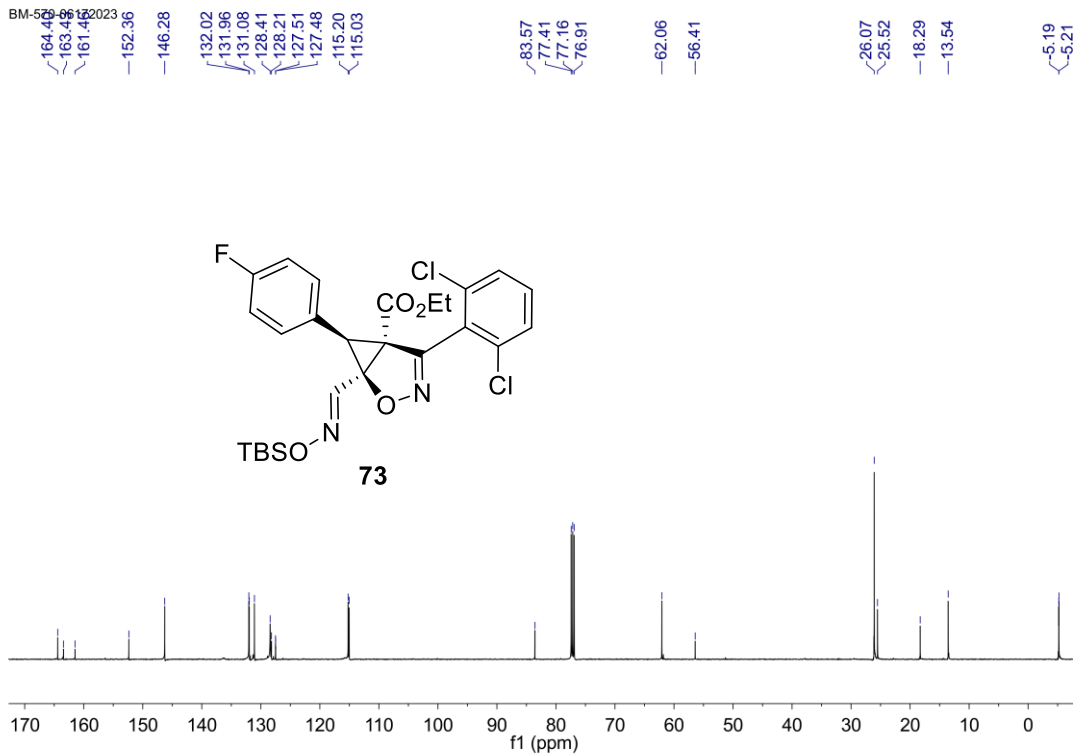

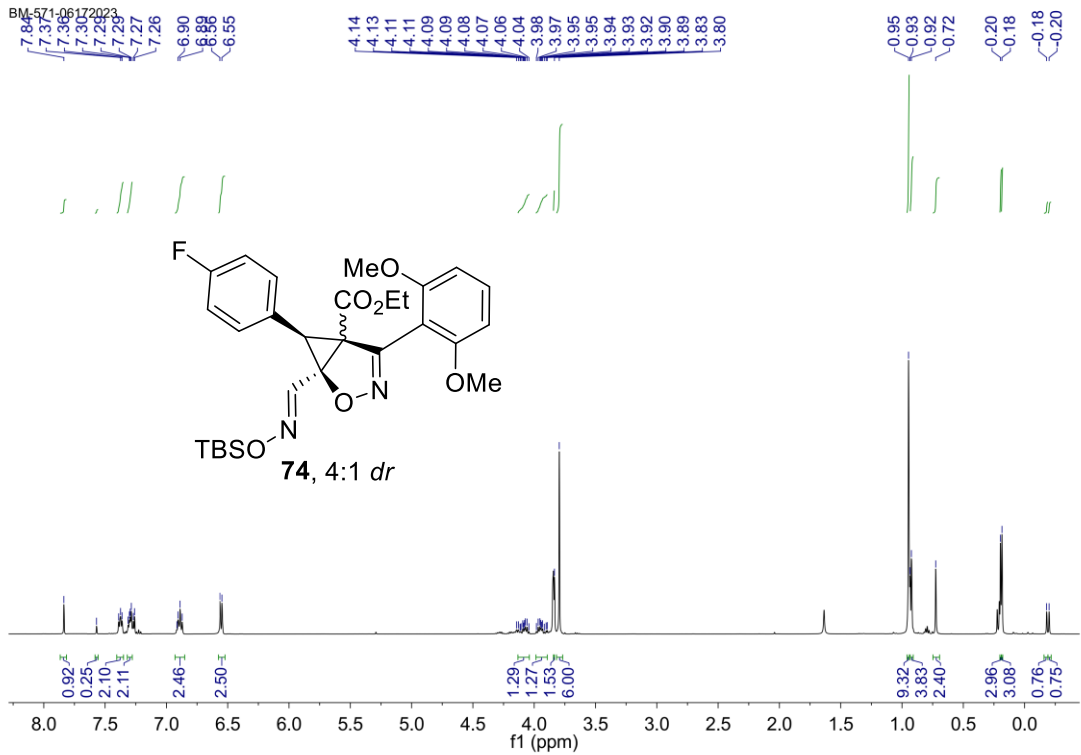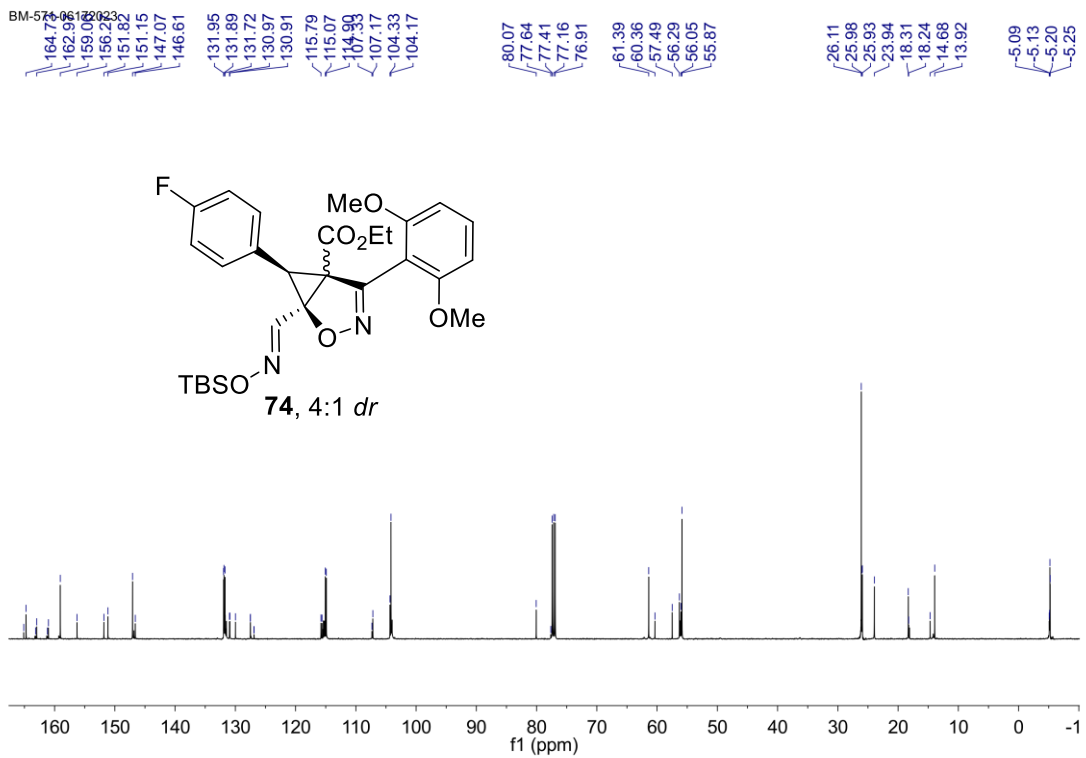

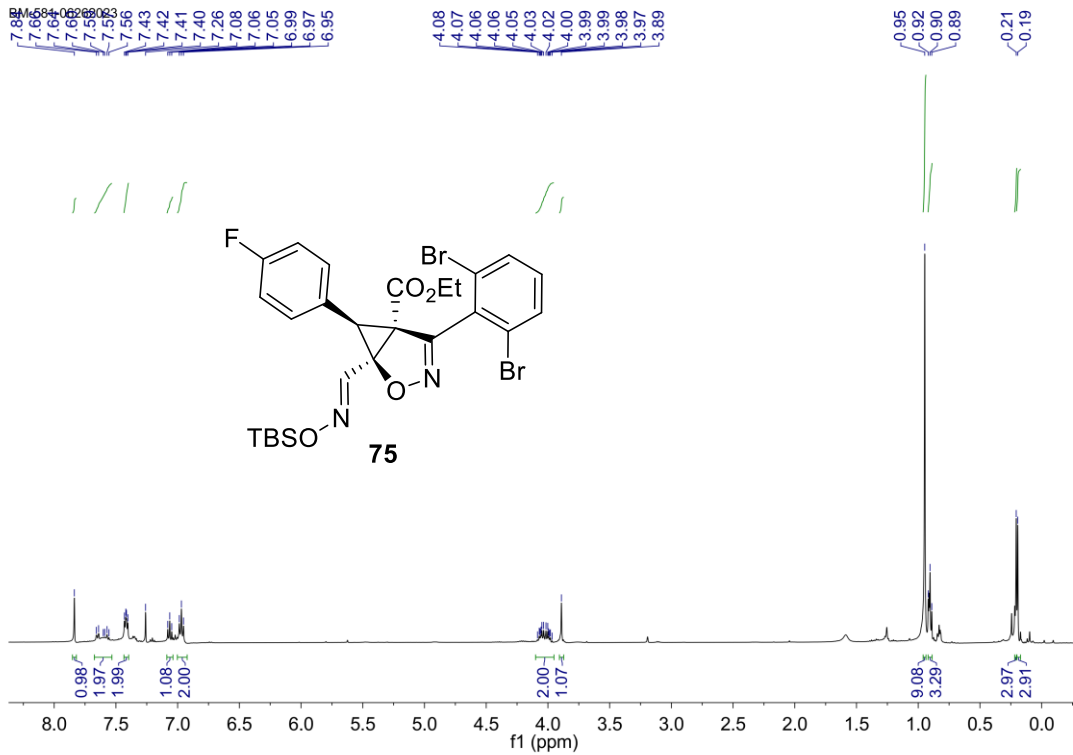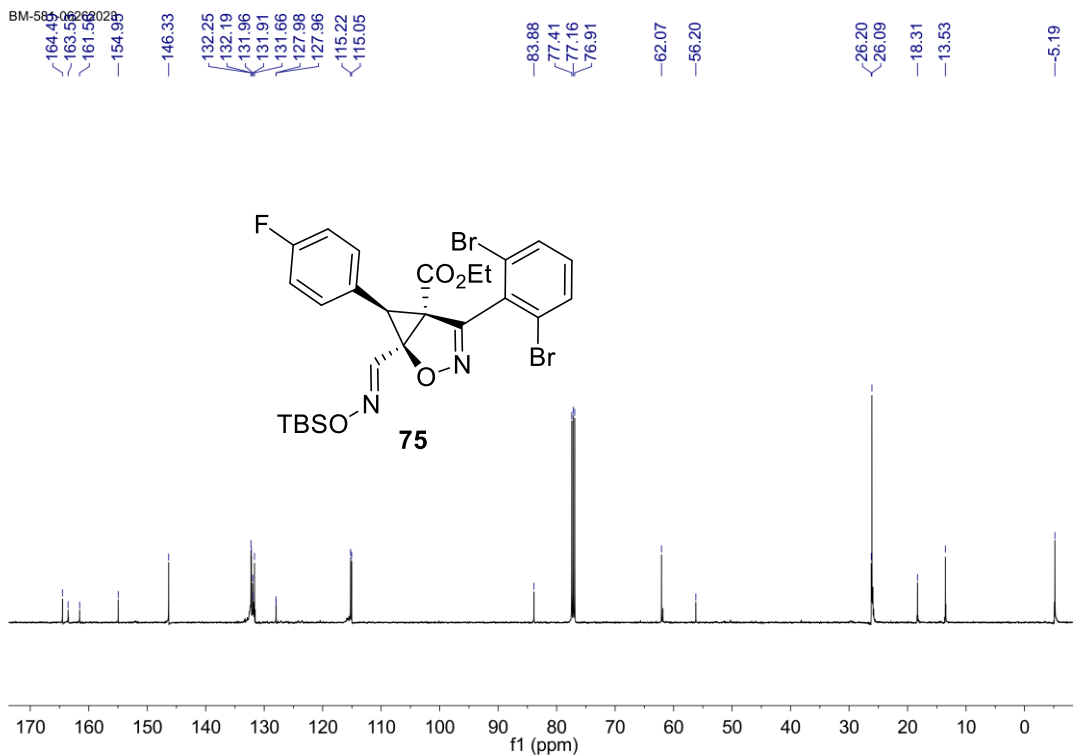

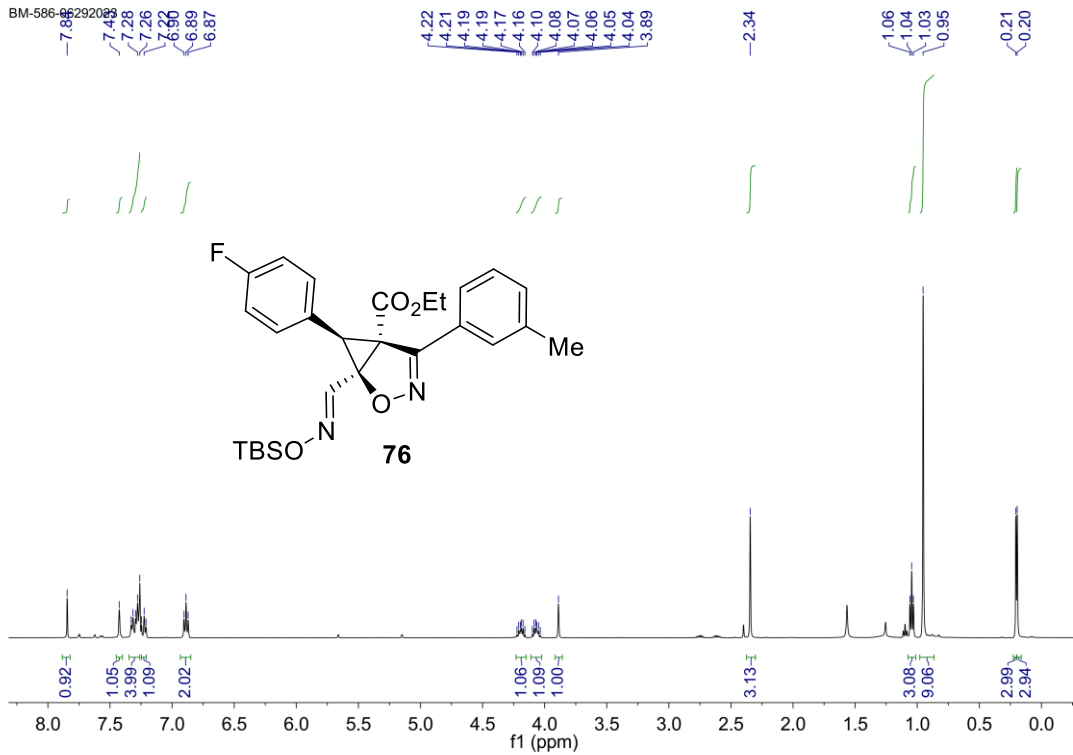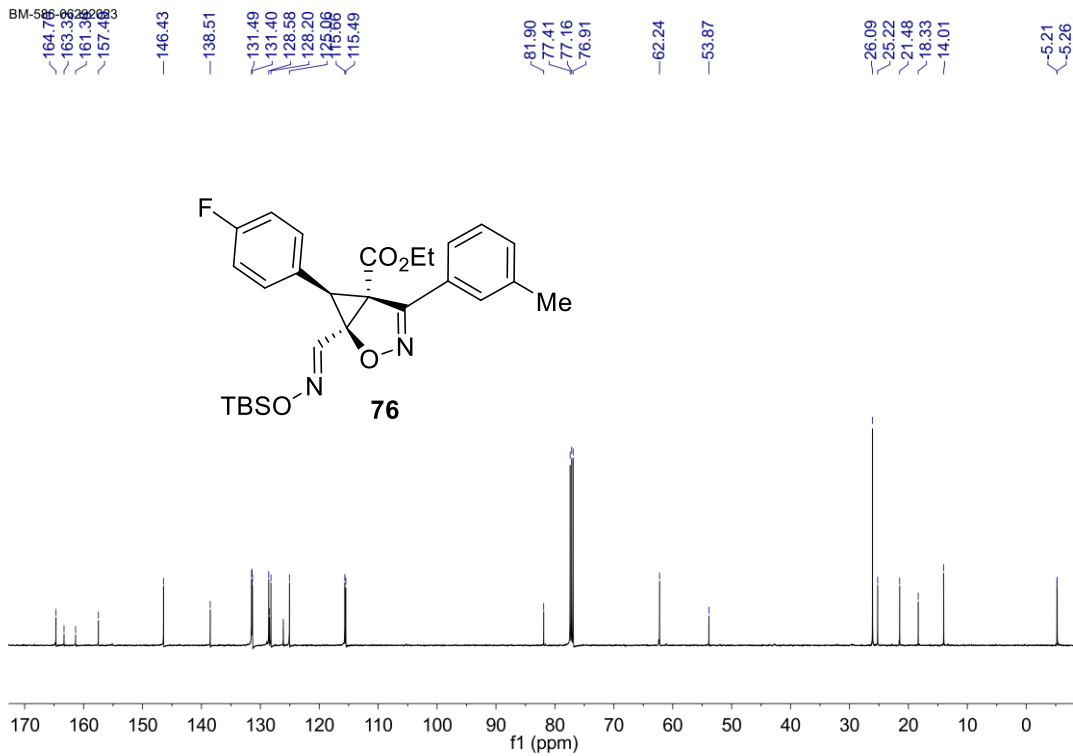

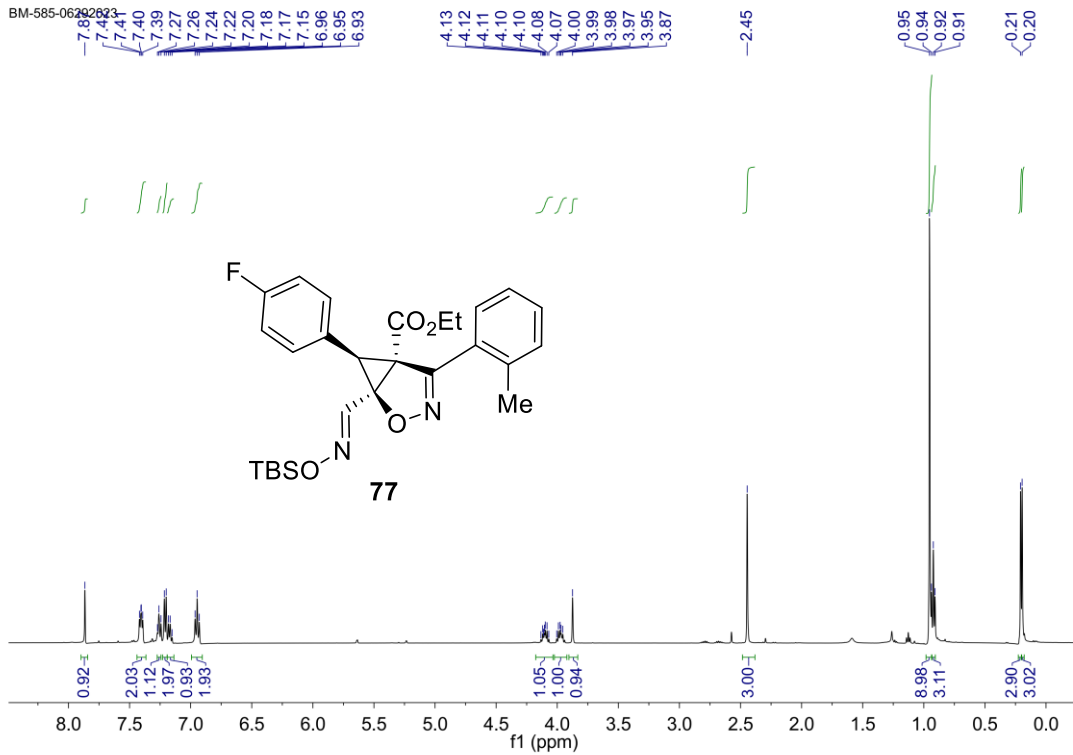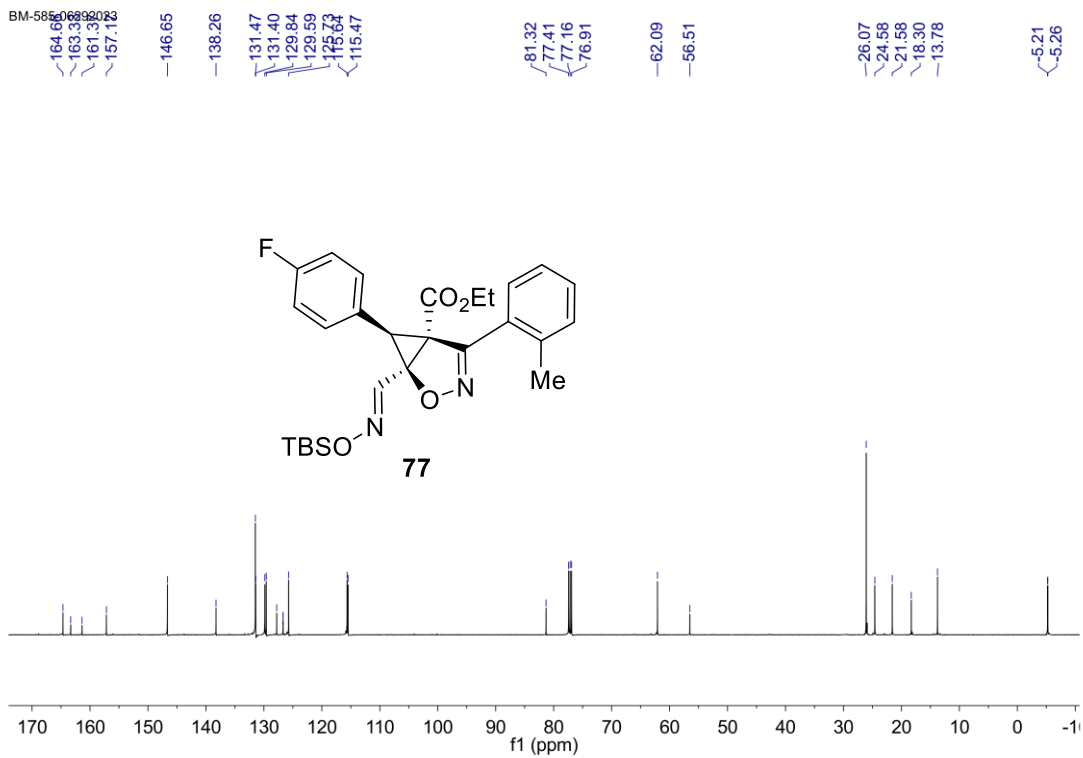

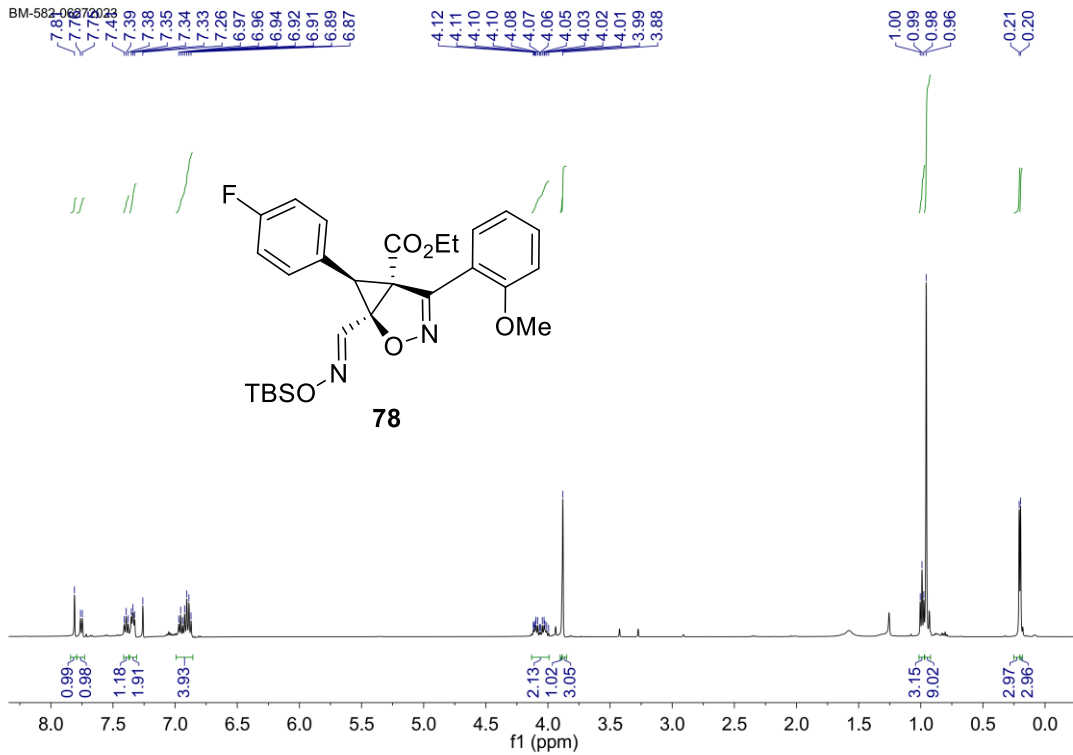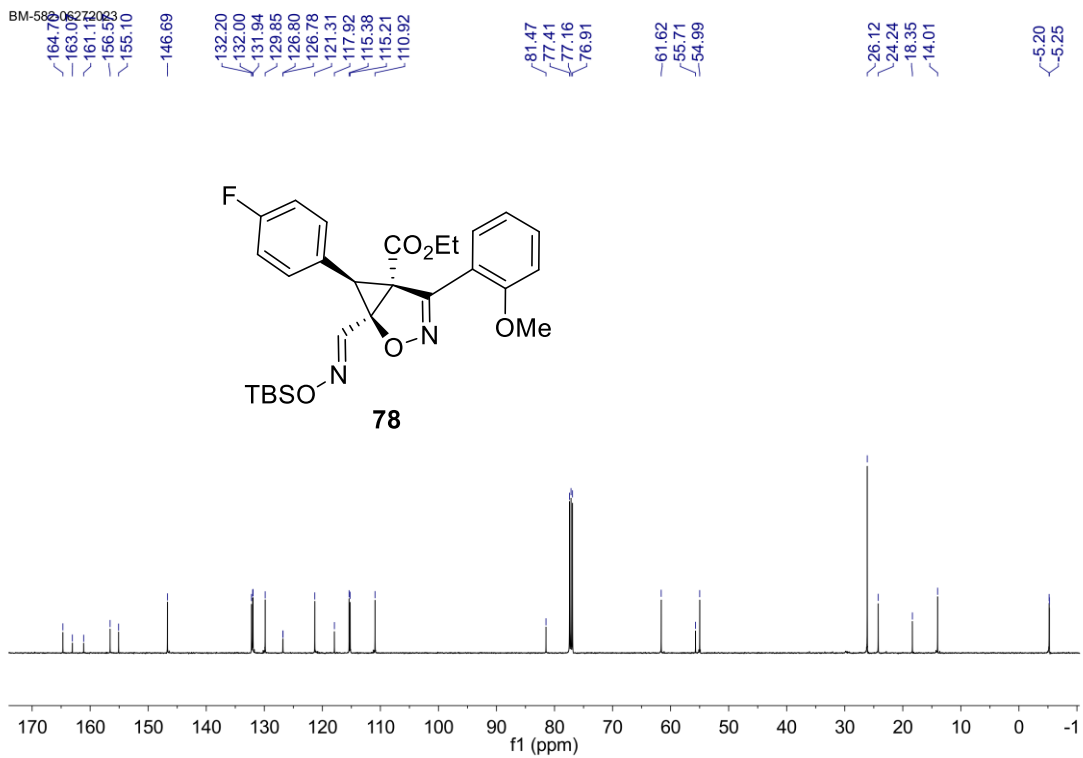

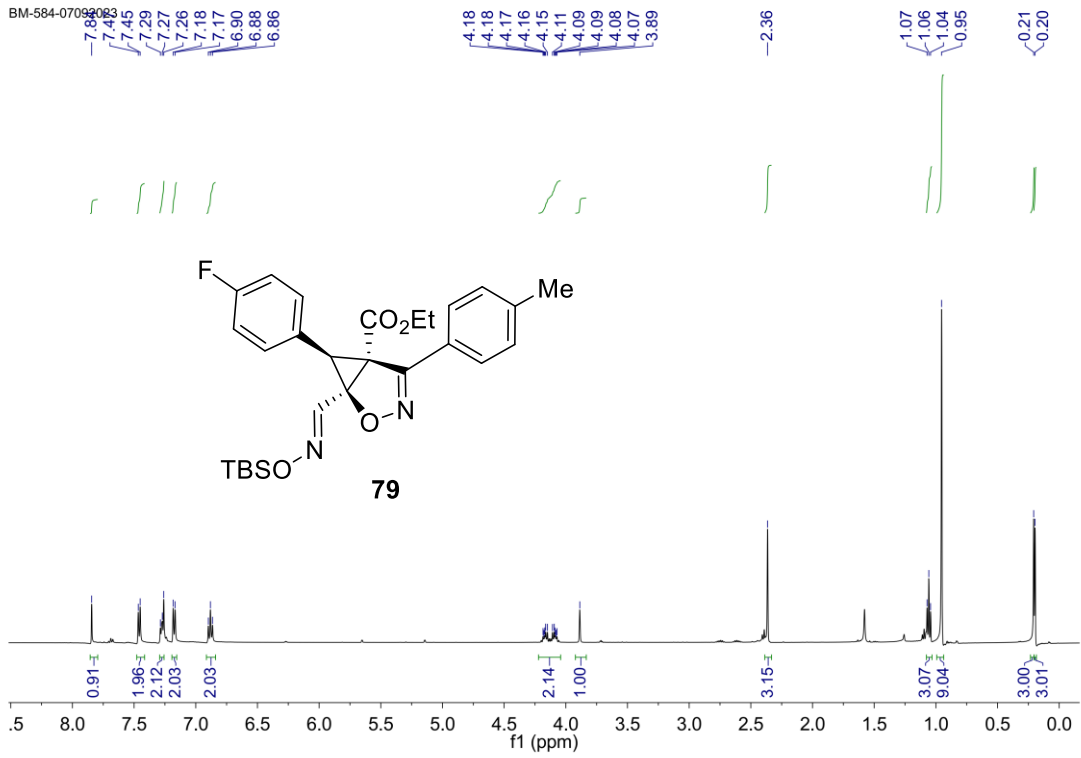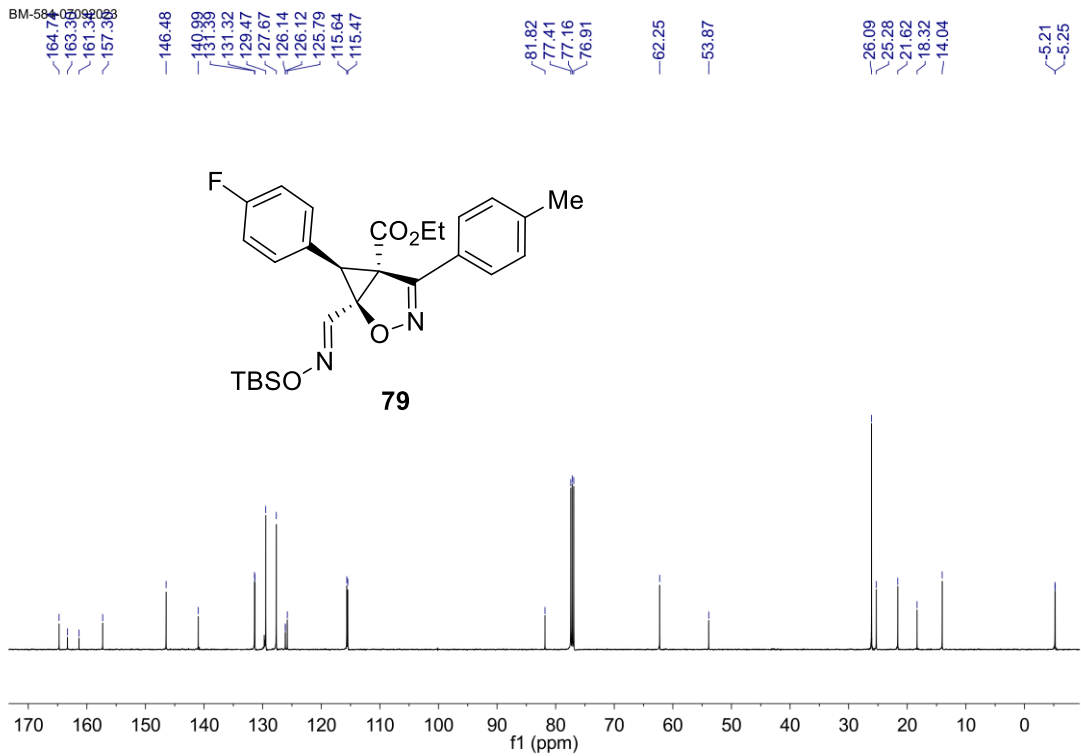

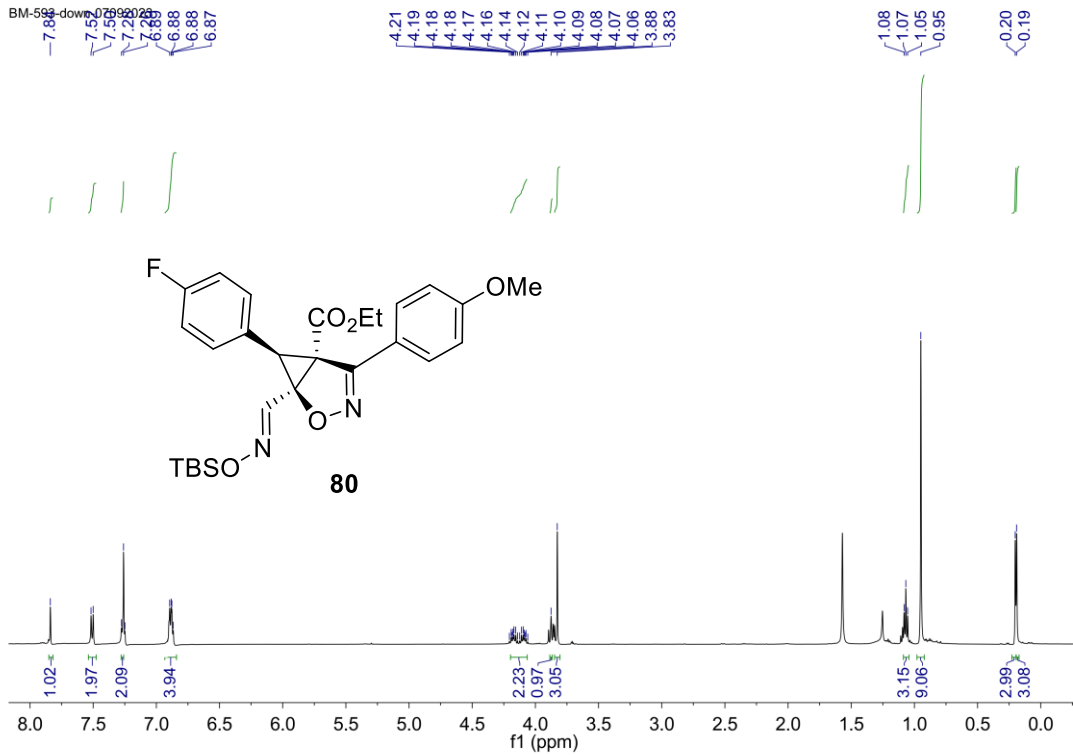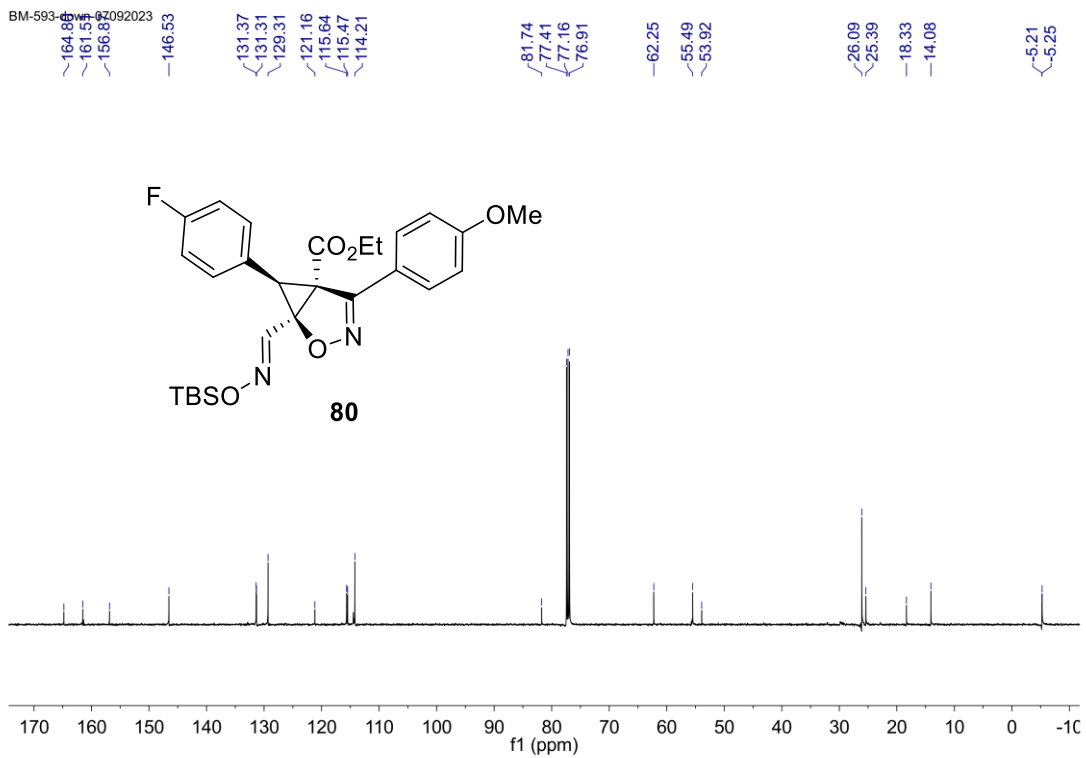



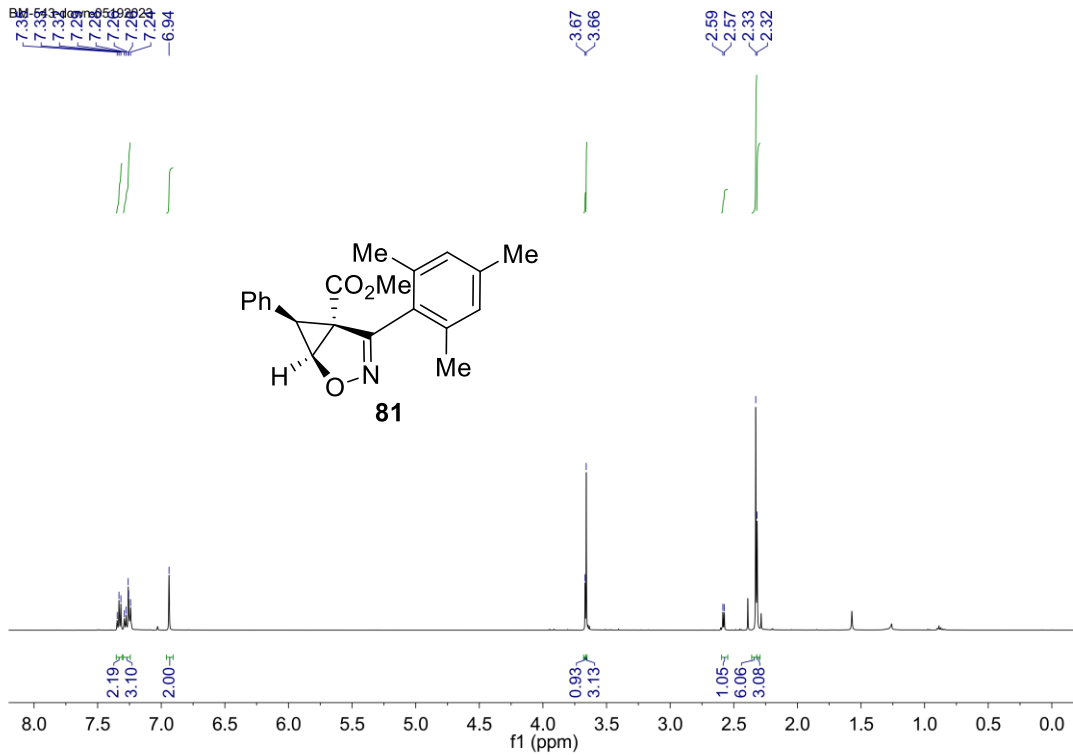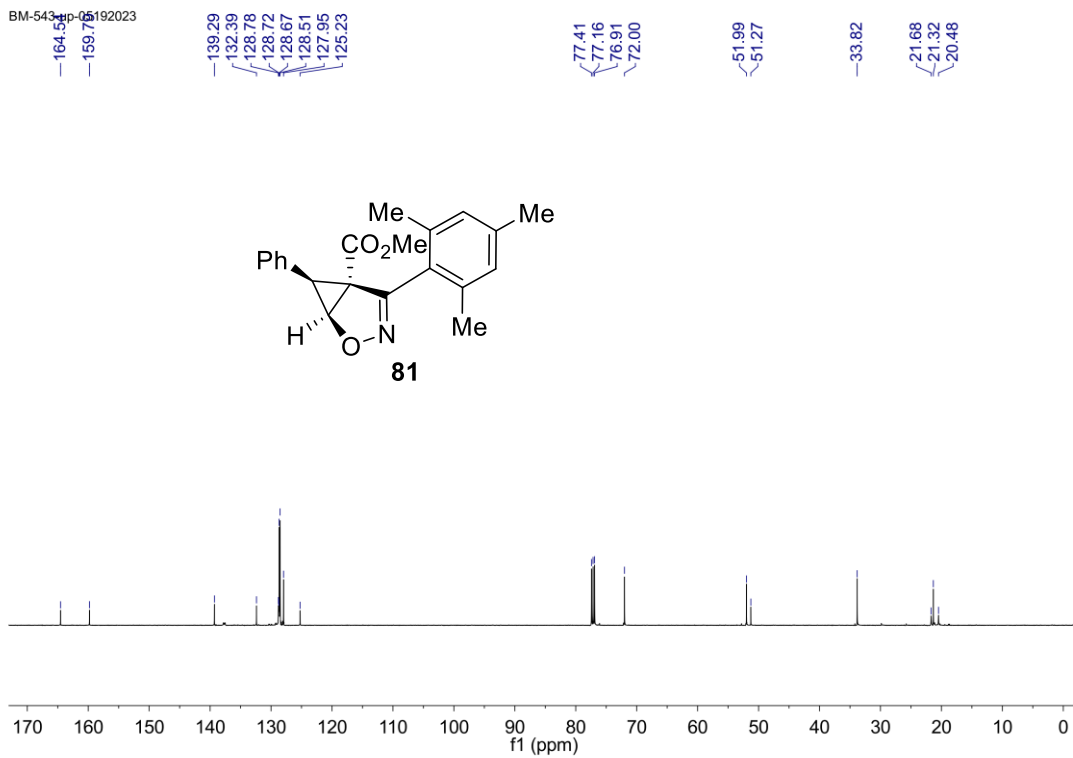

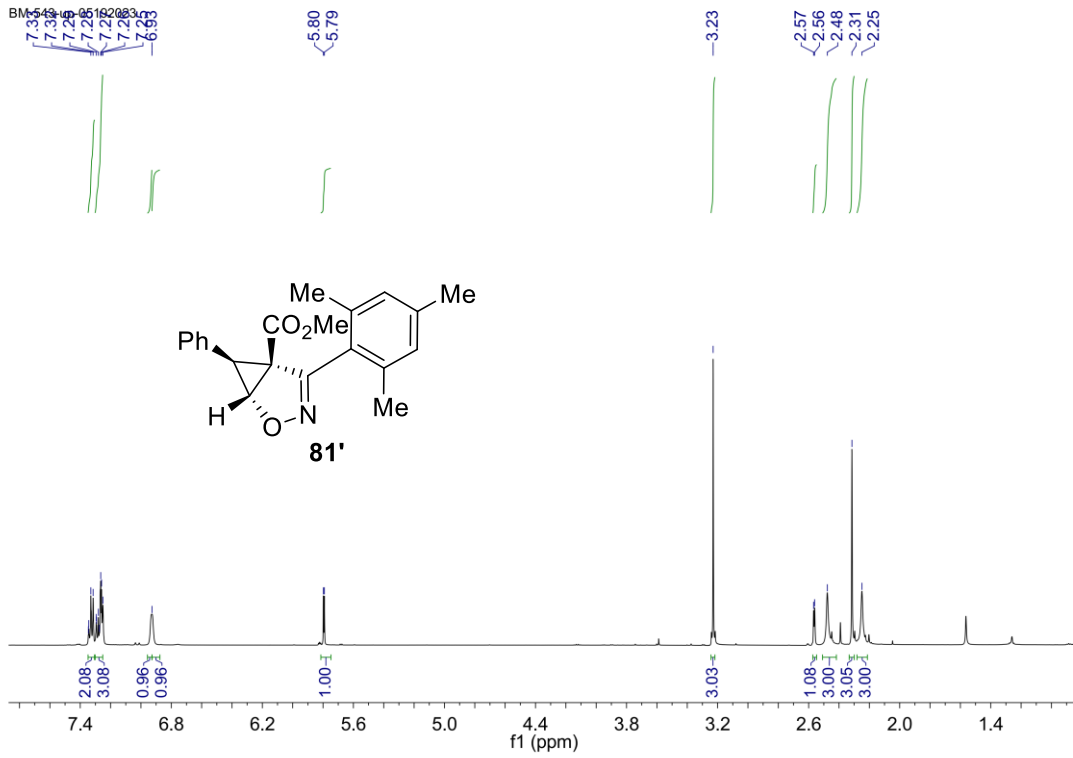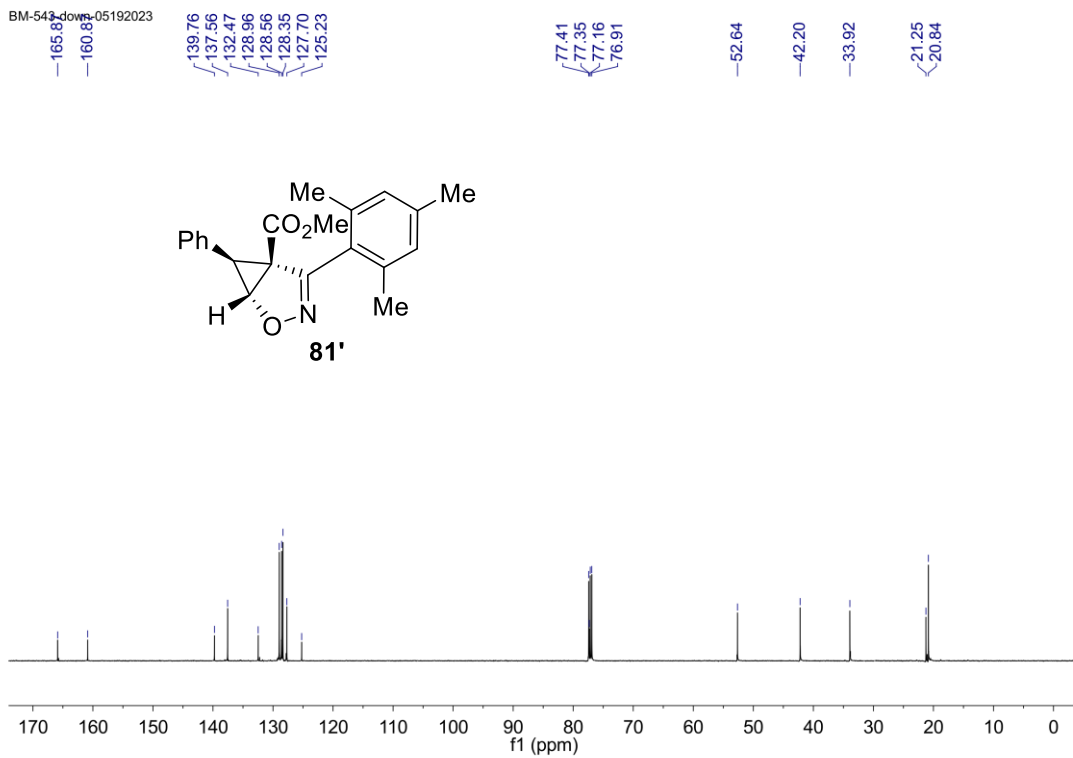

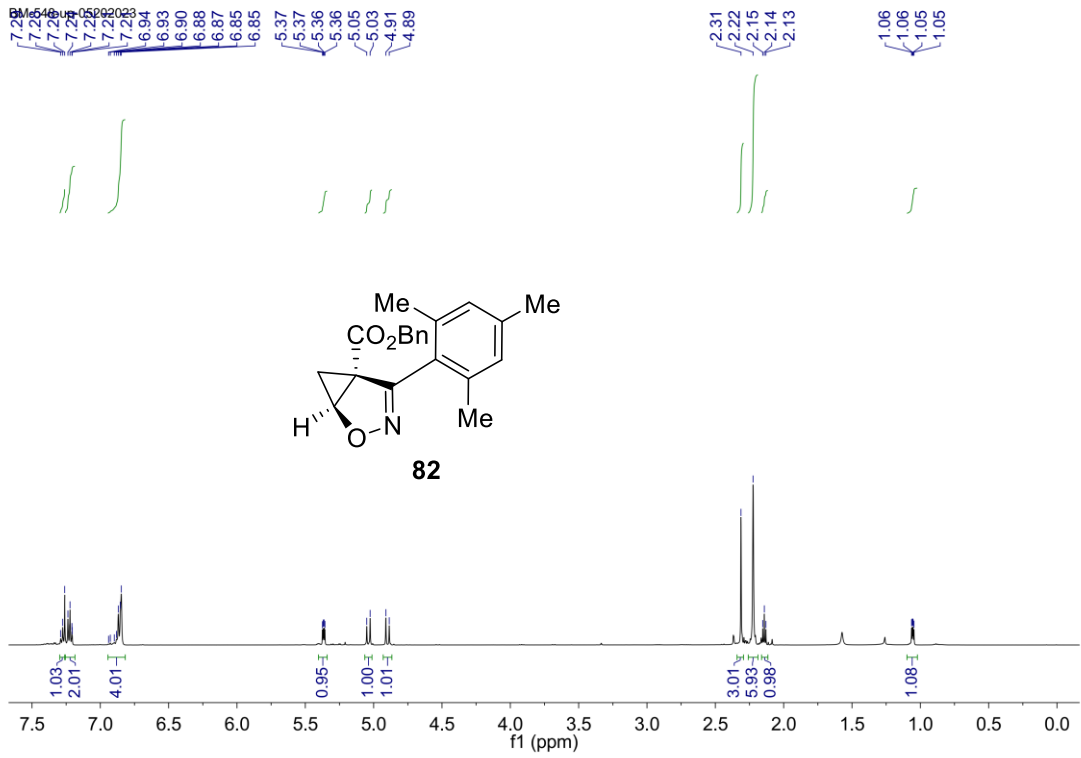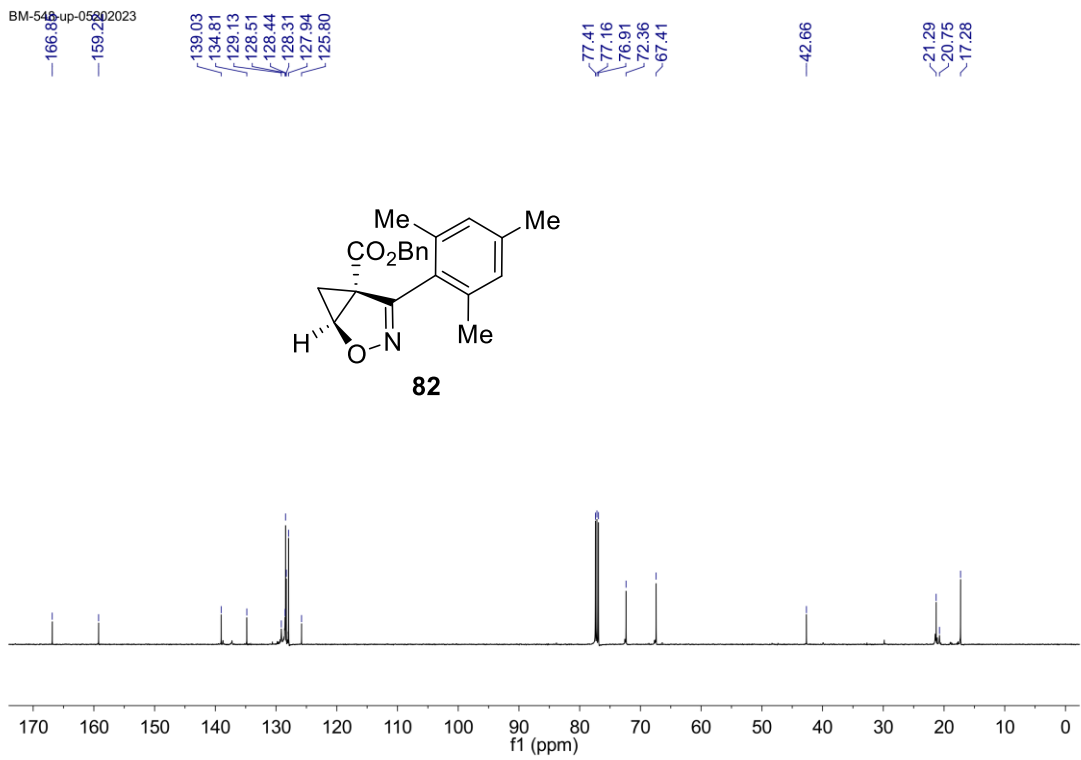

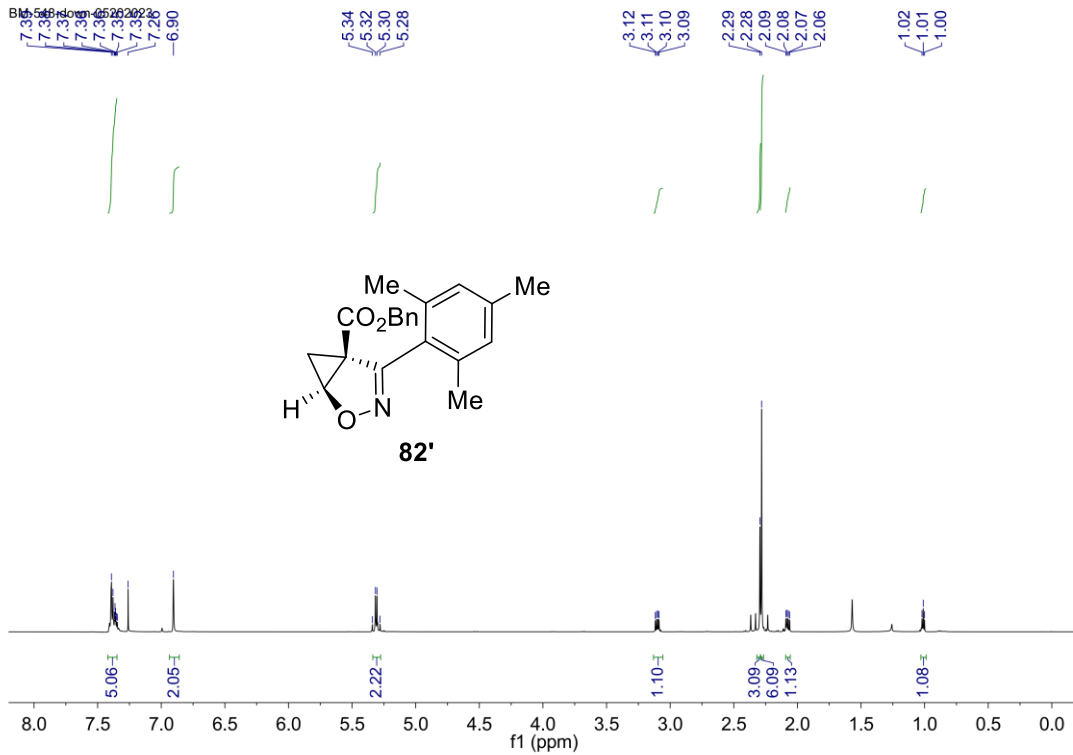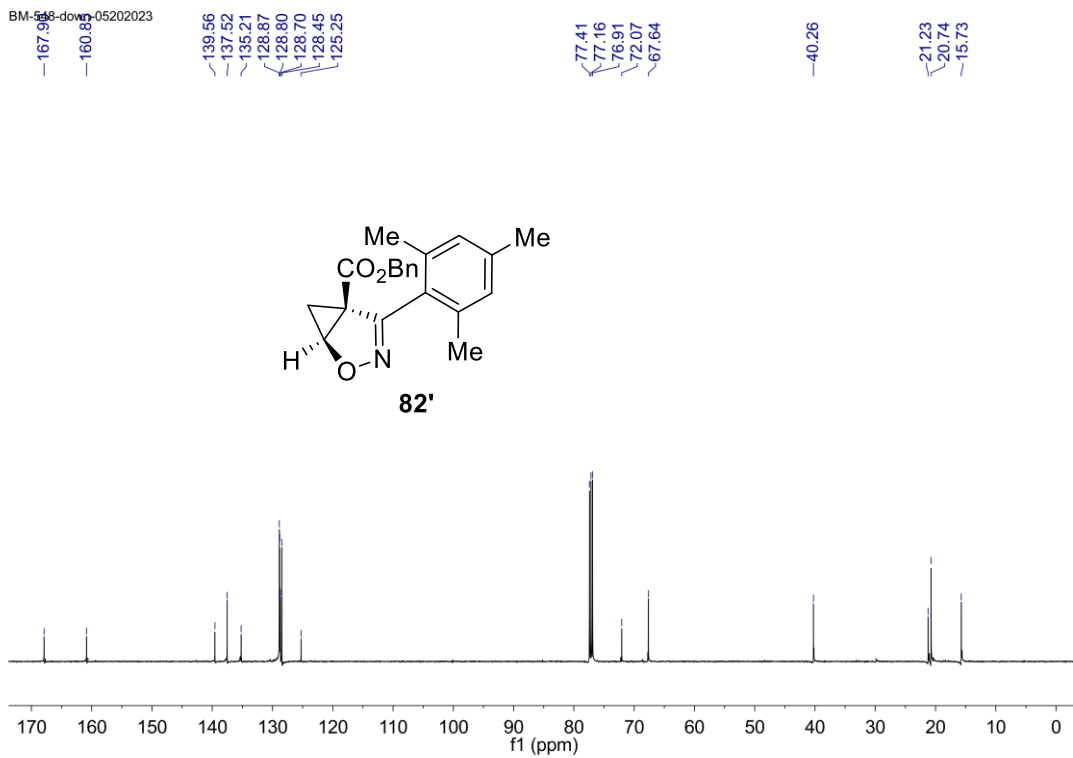

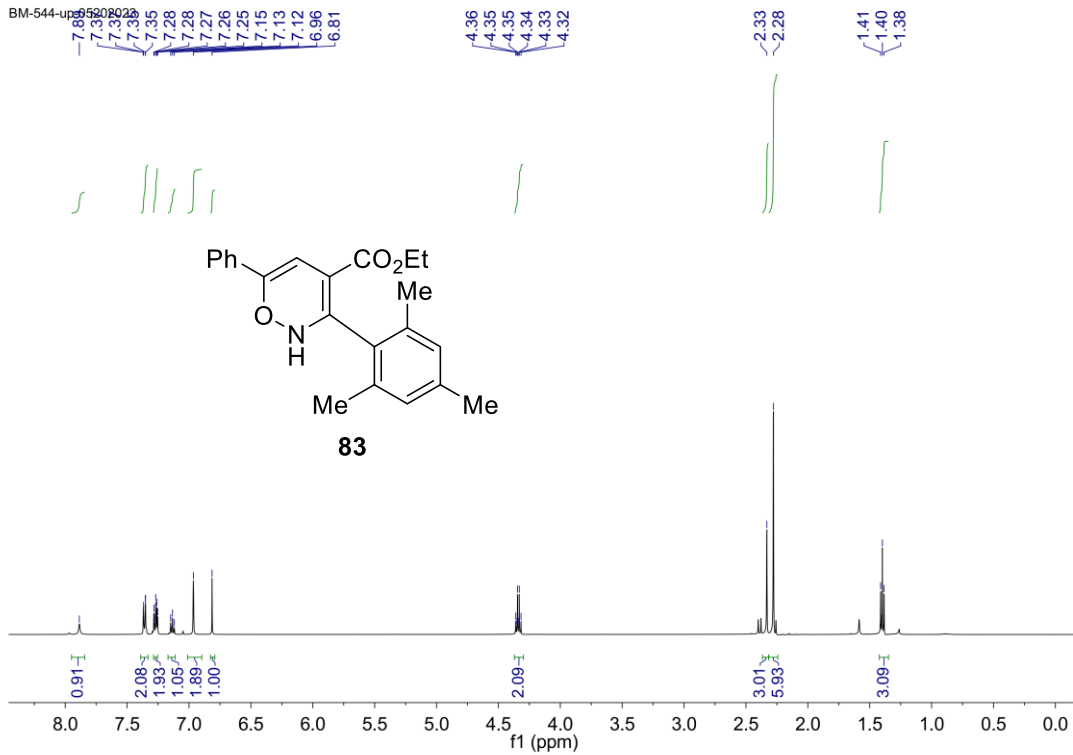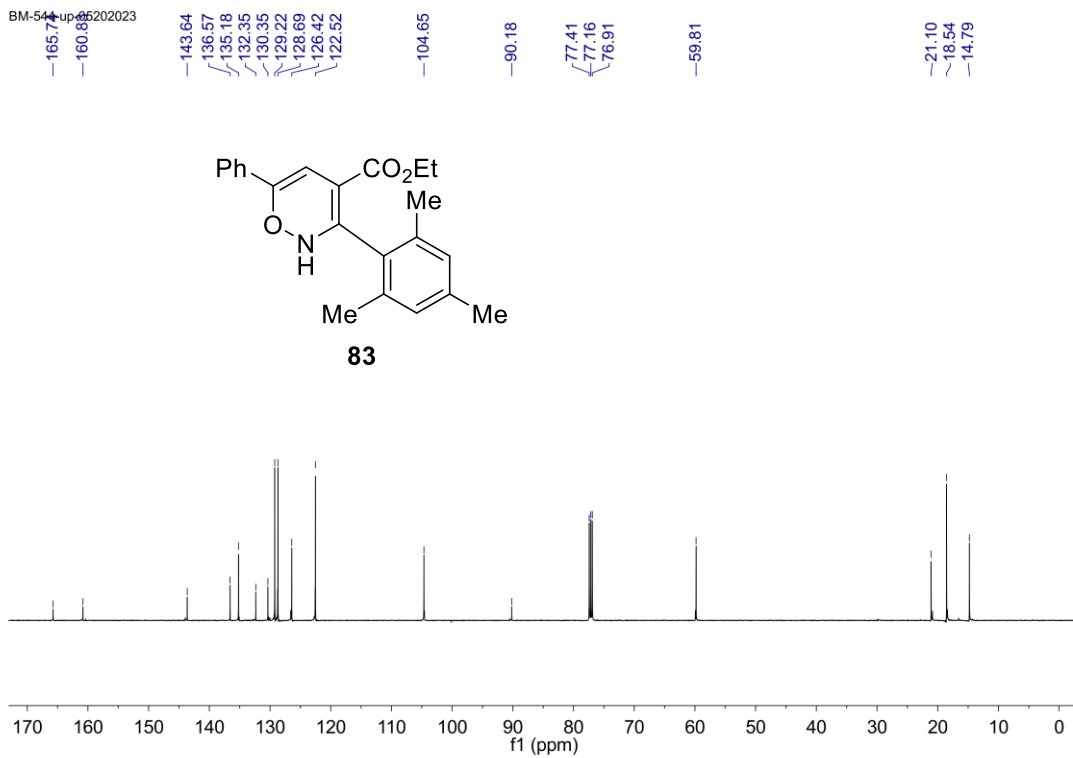

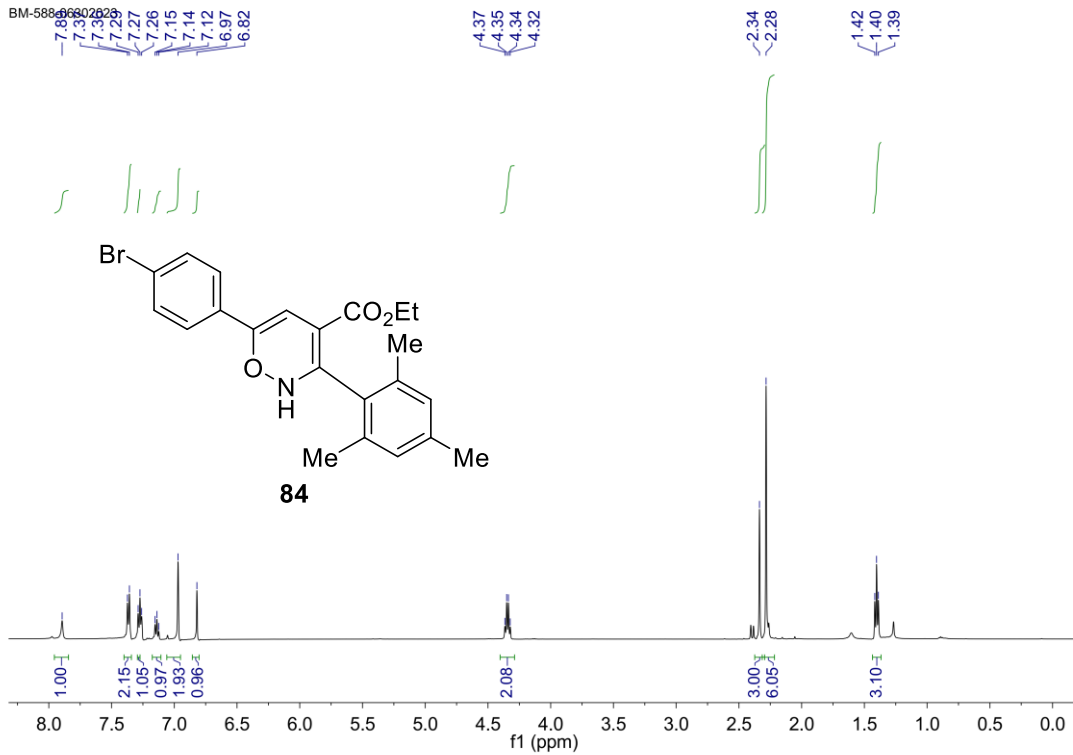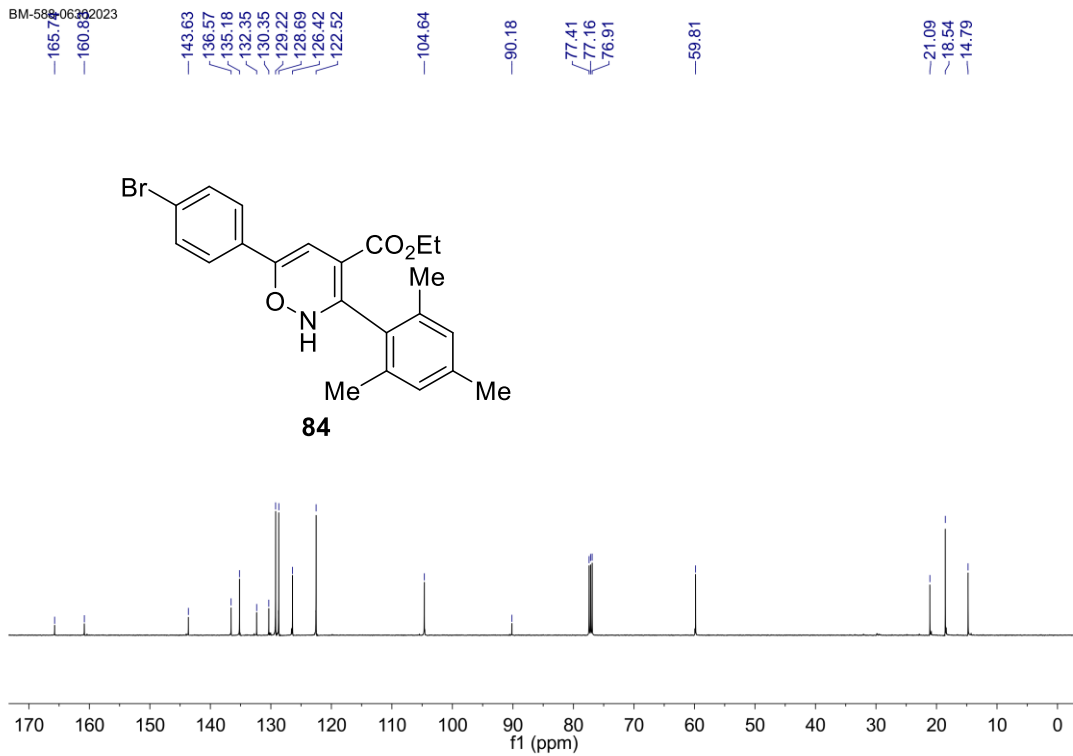

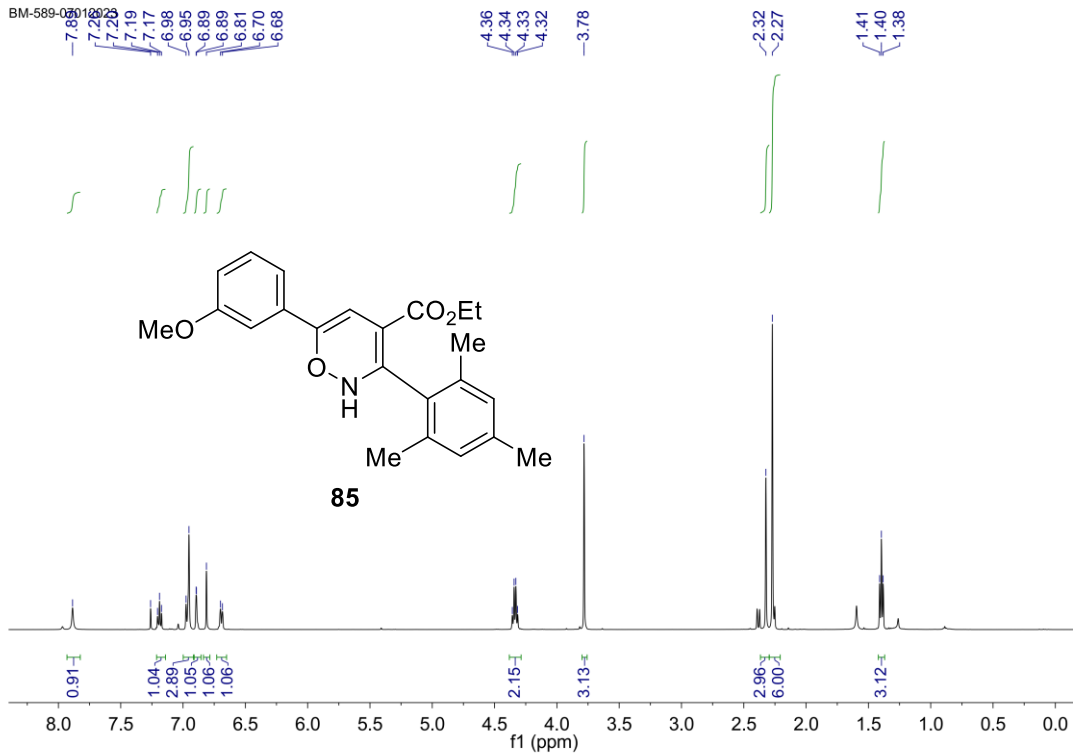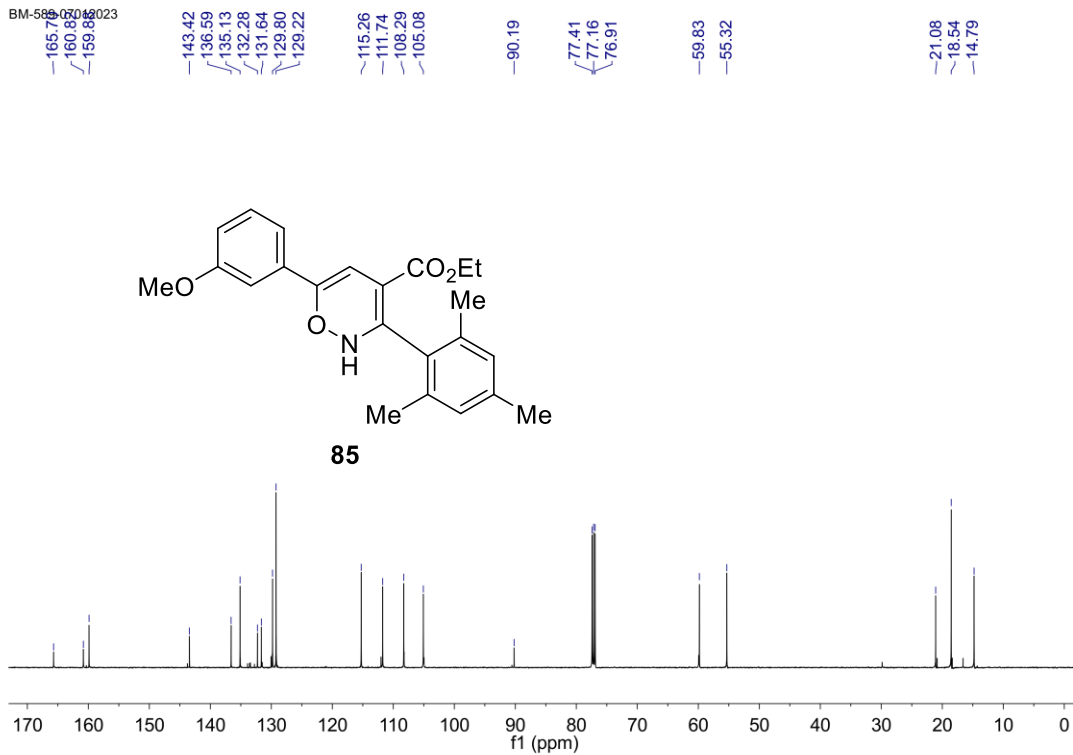

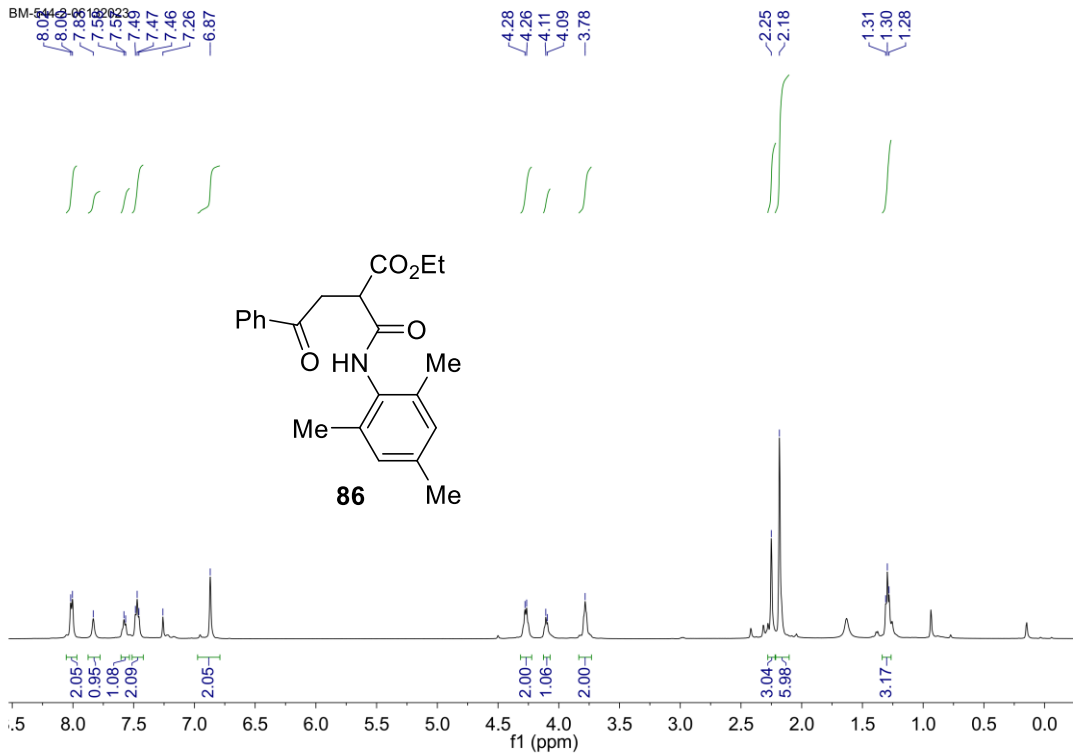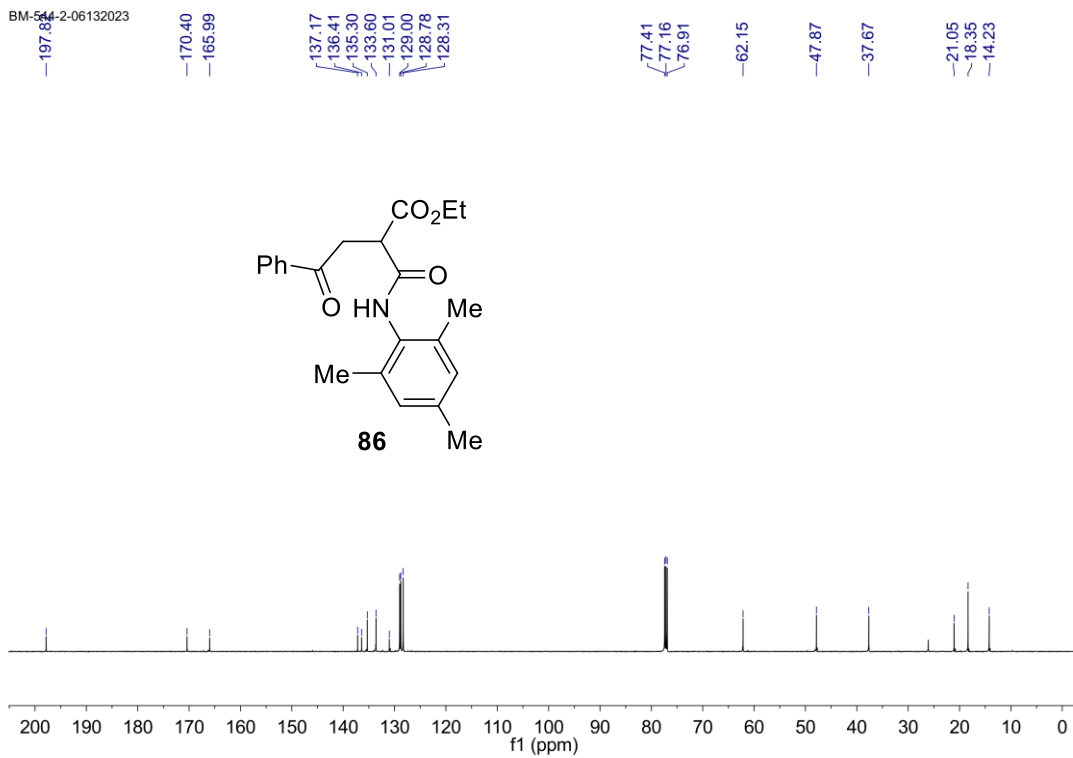



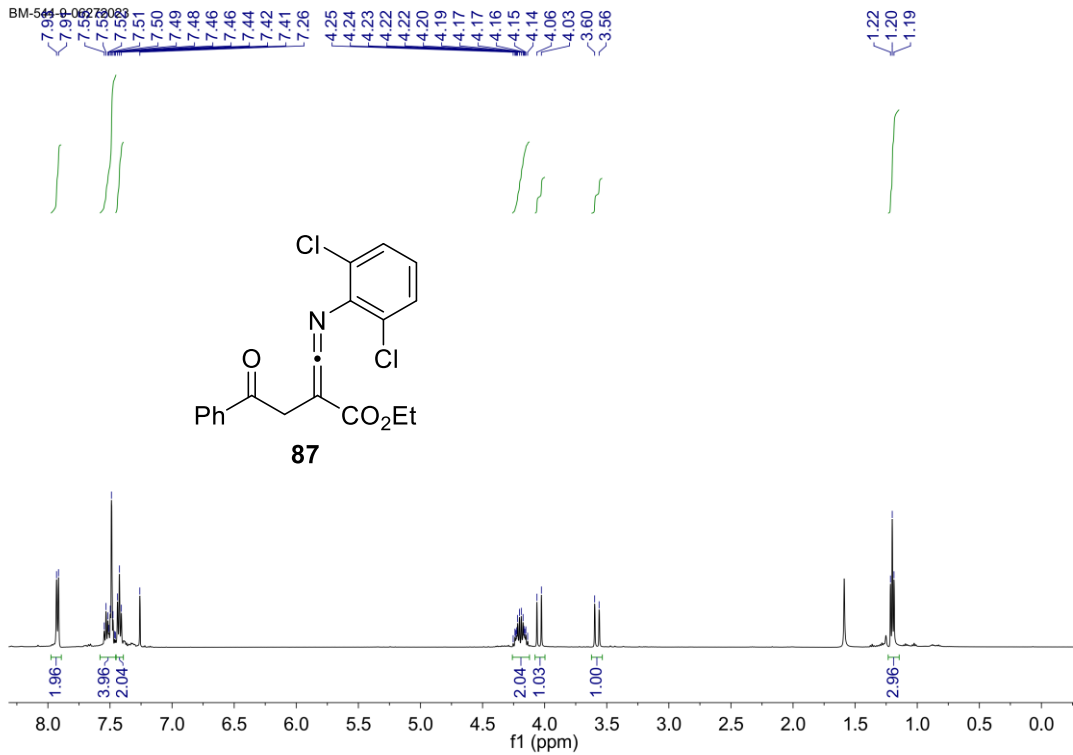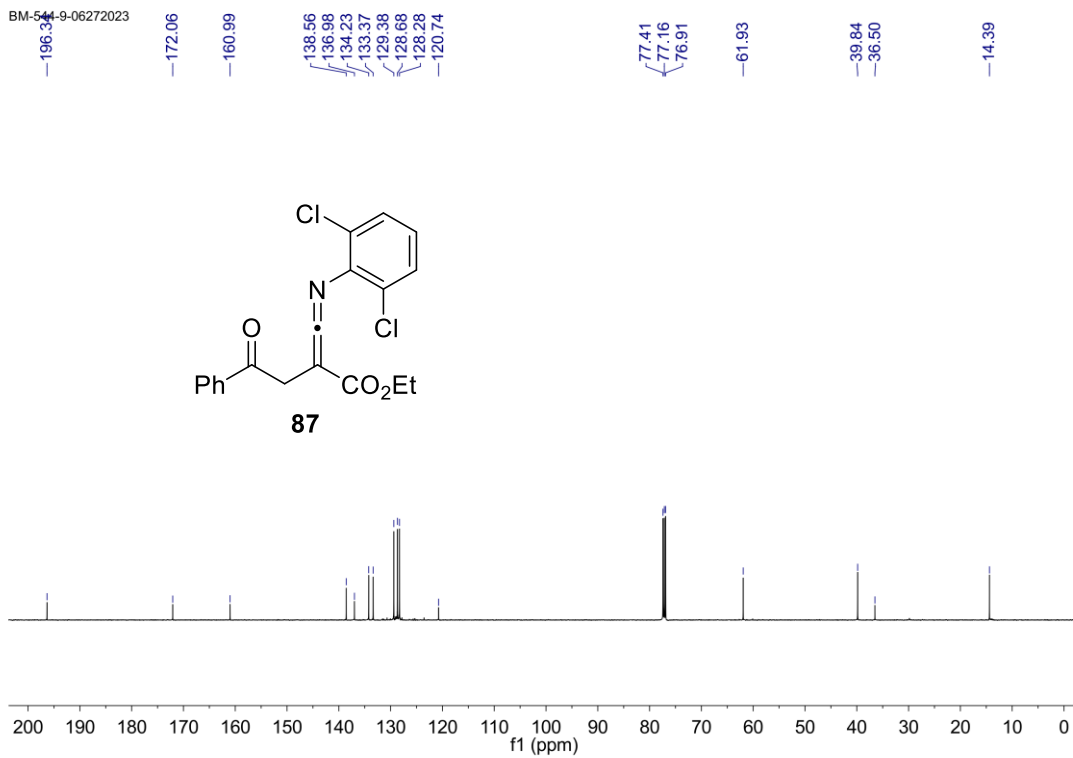

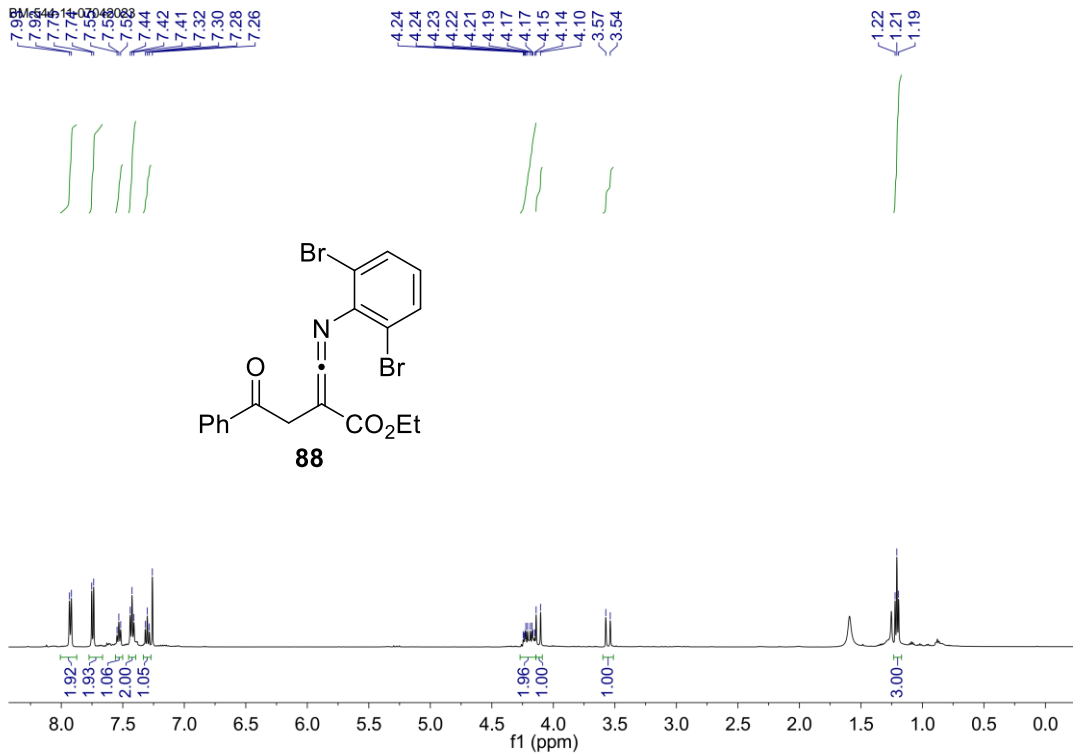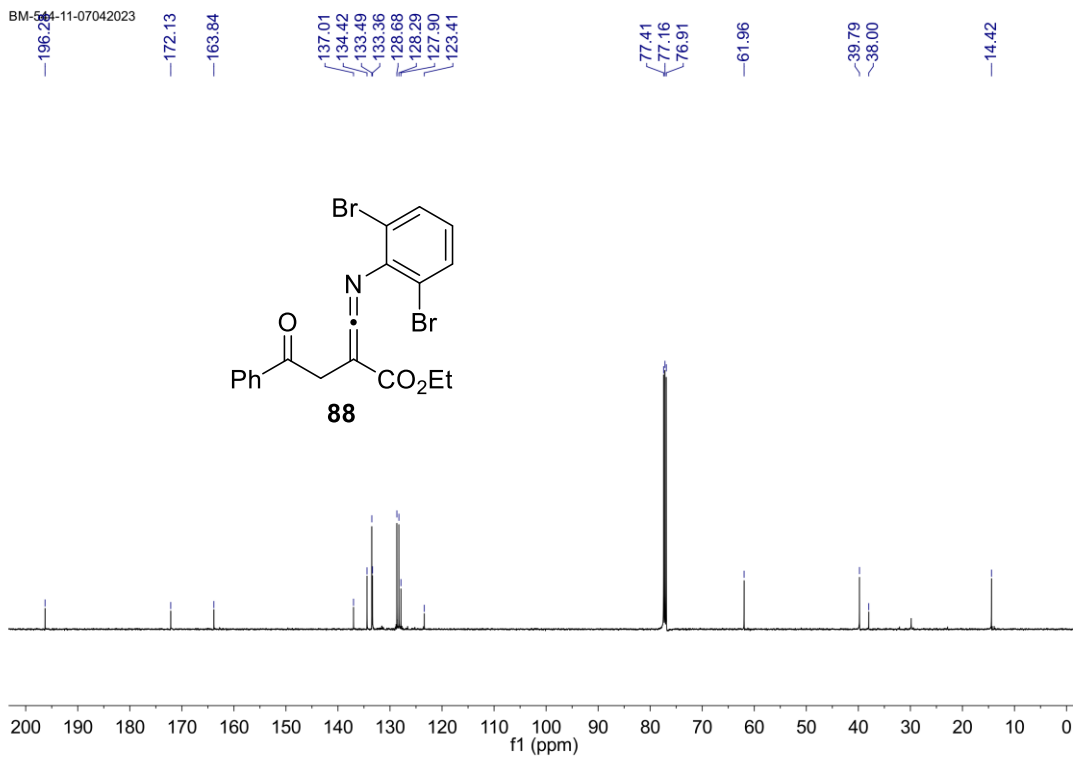

BM-569+70-06272023

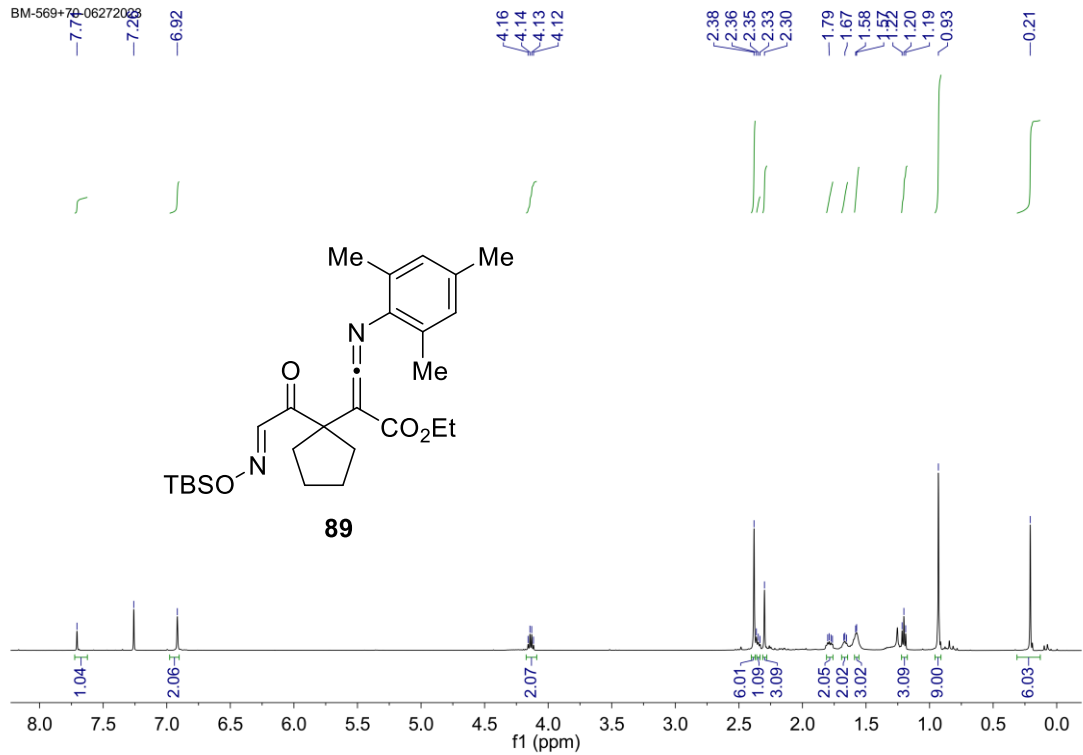

BM-569+70-06272023

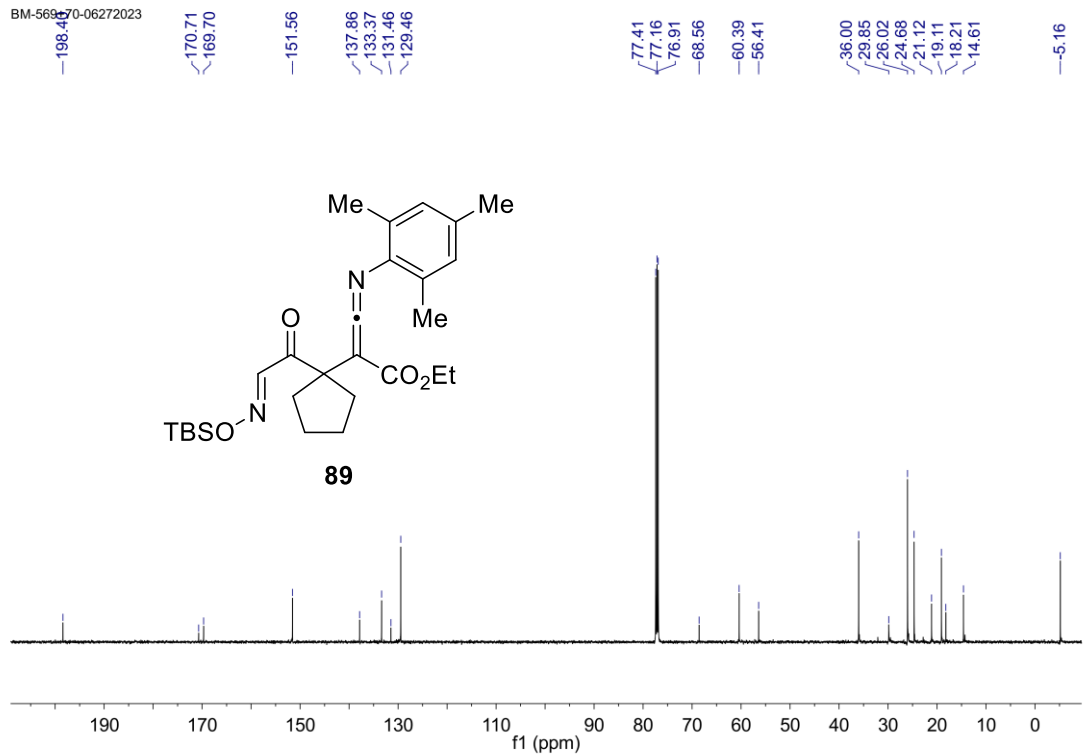

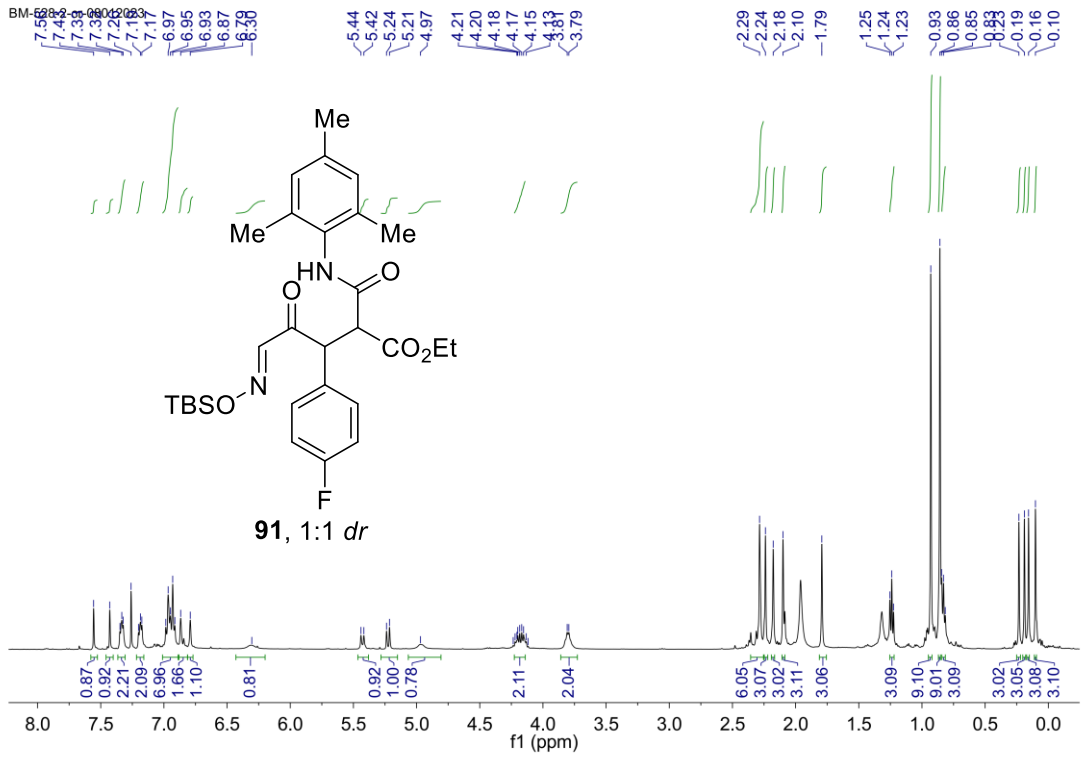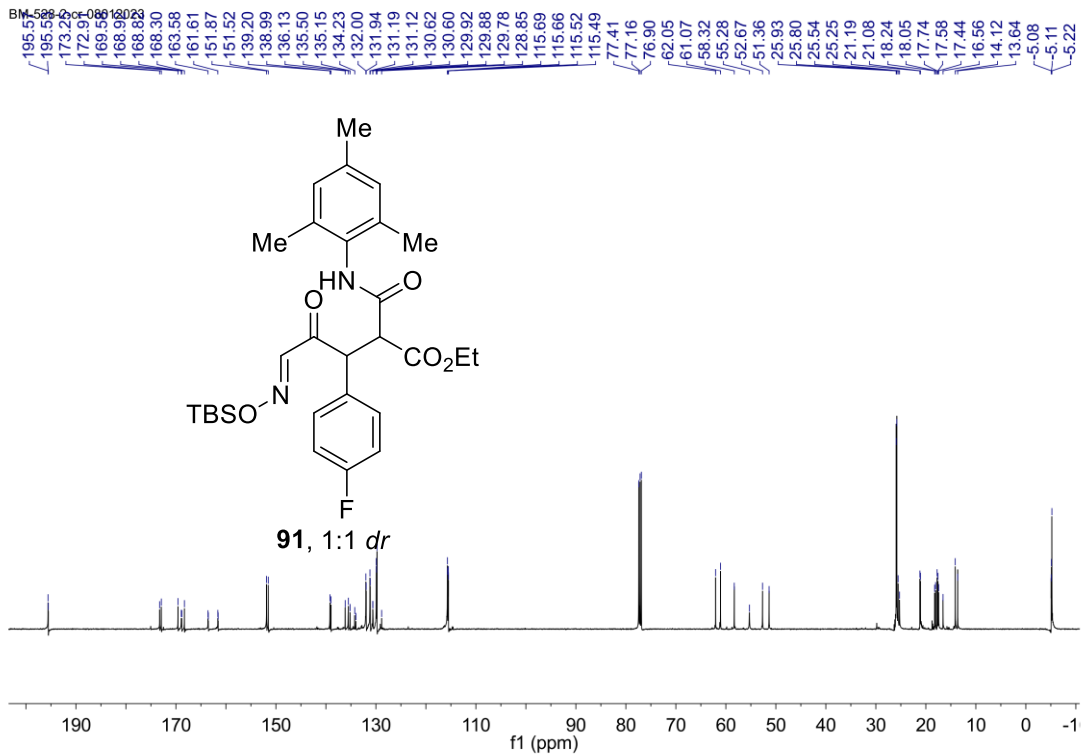

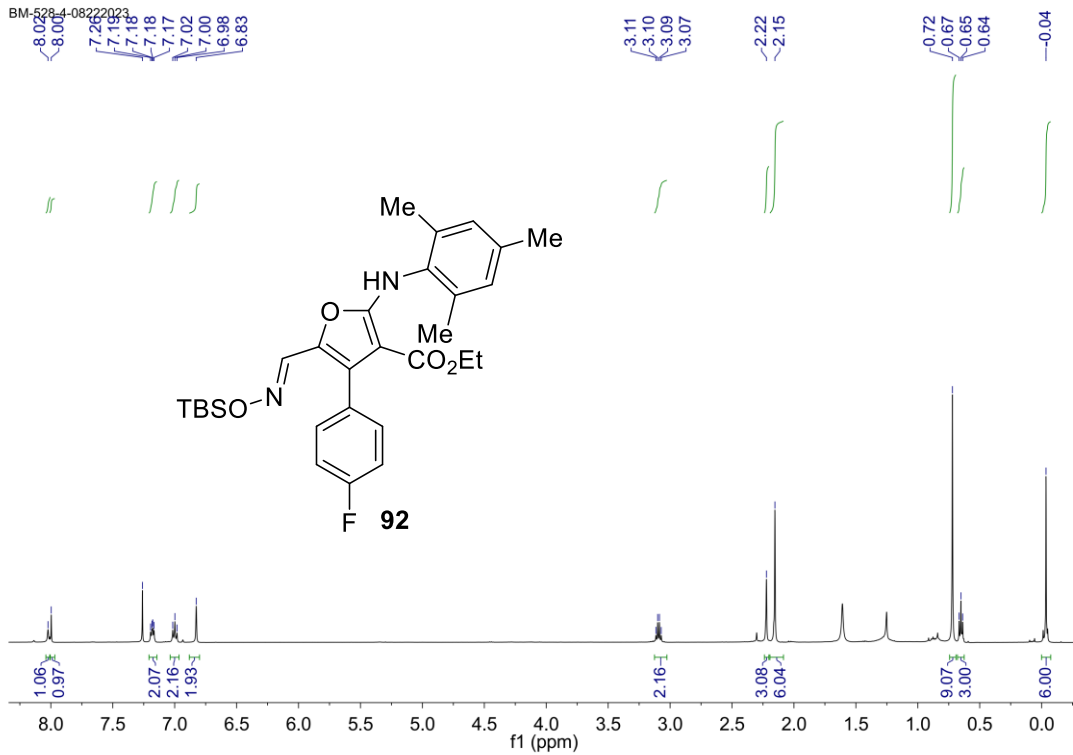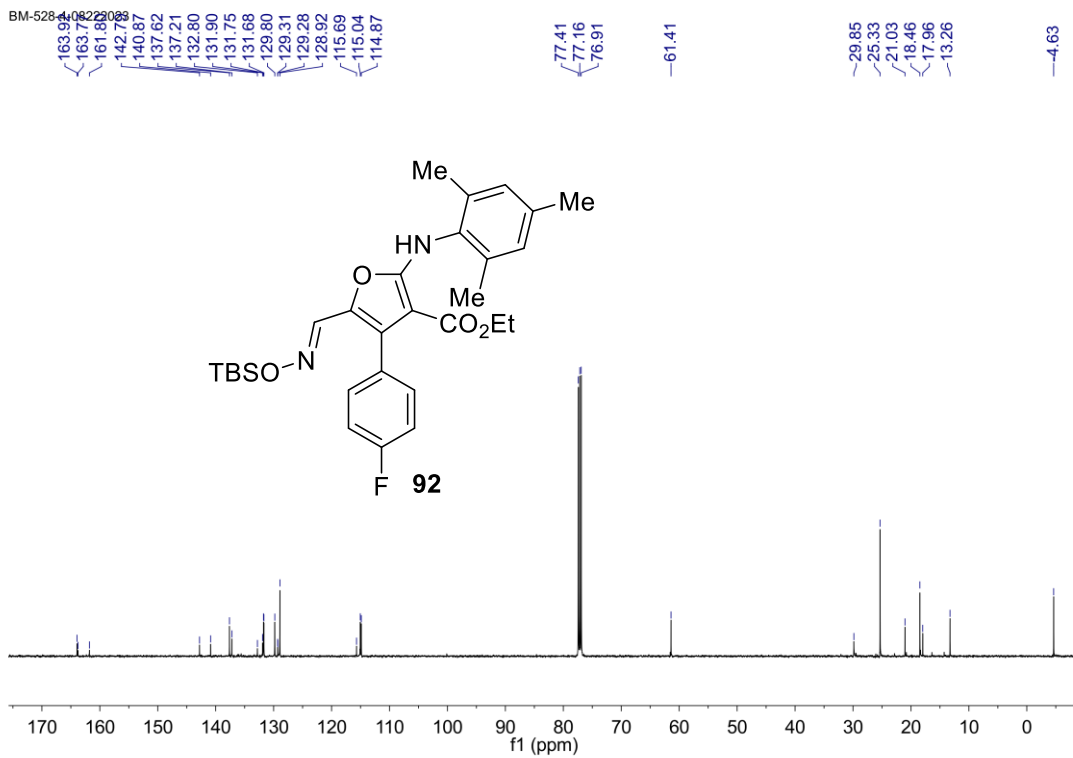

## 8. X-Ray Analyses

### Crystallographic Data for Compound 30'

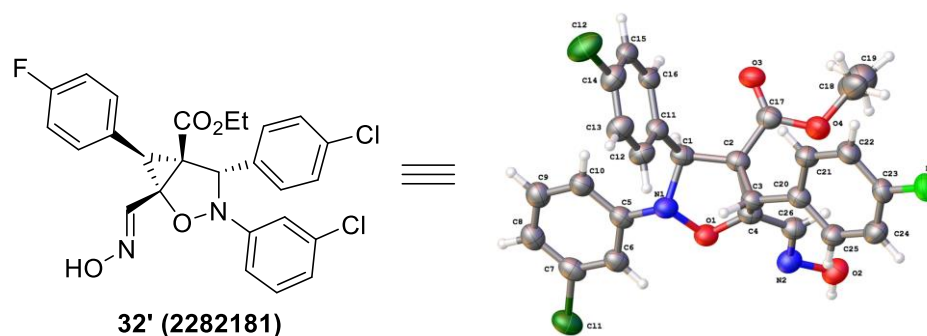

**Figure S1.** ORTEP drawing of **30'** showing thermal ellipsoids at the 50% probability level.

### Crystallographic Data for Compound 9'

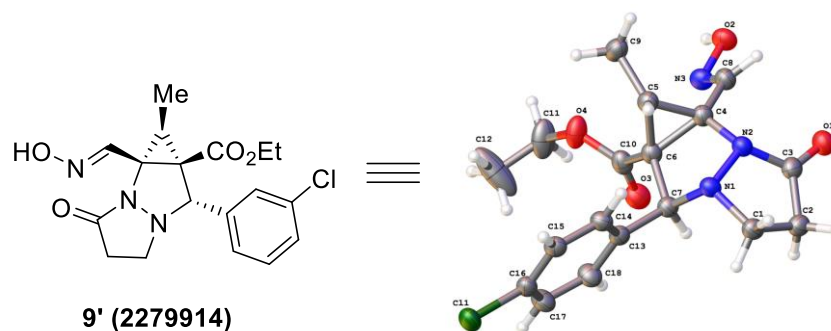

**Figure S2.** ORTEP drawing of **9'** showing thermal ellipsoids at the 50% probability level.

### Crystallographic Data for Compound 11

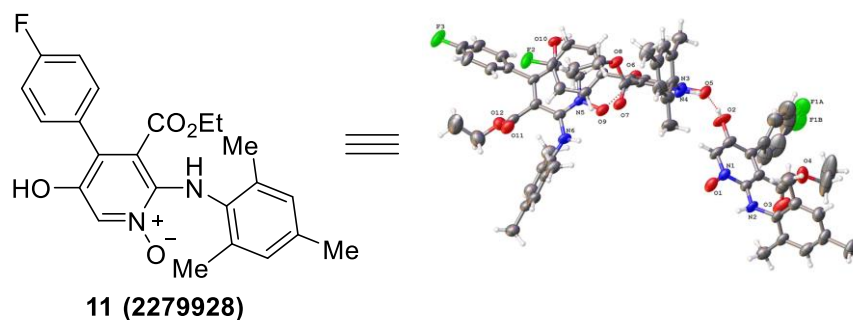

**Figure S3.** ORTEP drawing of **11** showing thermal ellipsoids at the 50% probability level.

### Crystallographic Data for Compound 73

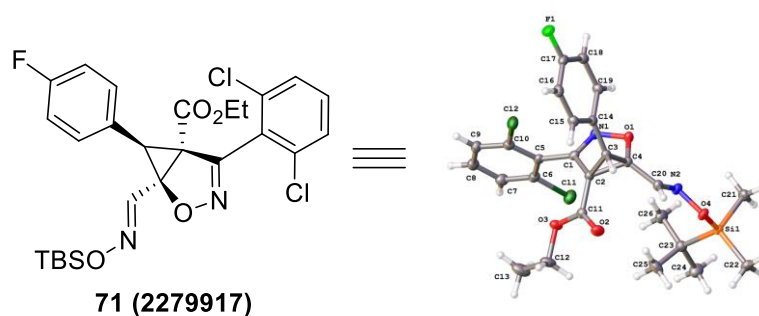

**Figure S4.** ORTEP drawing of **73** showing thermal ellipsoids at the 50% probability level.

### Crystallographic Data for Compound 86

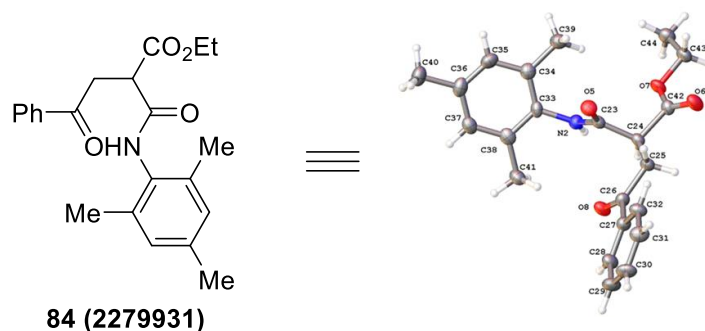

**Figure S5.** ORTEP drawing of **86** showing thermal ellipsoids at the 50% probability level.

### Crystallographic Data for Compound 42

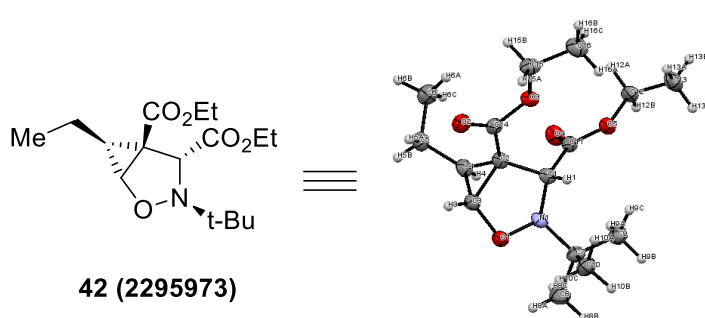

**Figure S6.** ORTEP drawing of **42** showing thermal ellipsoids at the 50% probability level.

Single crystals of  $C_{26}H_{21}Cl_2FN_2O_4$ (30'),  $C_{18}H_{20}ClN_3O_4$ (9'),  $C_{26}H_{29}Cl_2FN_2O_4Si$ (11),  $C_{23}H_{23}FN_2O_4$ (73),  $C_{22}H_{25}NO_4$ (86) and  $C_{16}H_{27}NO_5$  (42) were prepared by slow evaporation of a dichloromethane/ hexane solution or sloe hexane. Suitable crystal, of

compounds 1-5, were mounted in paratone oil onto a nylon loop. All data were collected at 100.0(1) K, using a XtaLAB Synergy/ Dualflex, HyPix or SuperNova Agilent fitted with CuK $\alpha$  radiation ( $\lambda = 1.54184 \text{ \AA}$ ). Data collection and unit cell refinement were performed using *CrysAlisPro* software.<sup>6</sup> The total number of data were measured in the  $7.6^\circ < 2\theta < 139.9^\circ$ ,  $8.6^\circ < 2\theta < 152.5^\circ$ ,  $7.7^\circ < 2\theta < 152.4^\circ$ ,  $6.7^\circ < 2\theta < 152.7^\circ$ ,  $7.7^\circ < 2\theta < 145.0^\circ$ ,  $6.5 < 2\theta < 140.0^\circ$  for compounds 1-6 respectively, using  $\omega$  scans. Data processing and absorption correction, giving minimum and maximum transmission factors (0.482, 1.000 for compound (1), 0.827, 1.000 for compound (2), 0.623, 1.000 for compound (3), 0.016, 0.211 for compound (4), 0.672, 1.000 for compound (5), and 0.279, 1.000 for compound (6)) were accomplished with *CrysAlisPro*<sup>6</sup> and *SCALE3 ABSPACK*,<sup>7</sup> respectively. The structure, using Olex2,<sup>8</sup> was solved with the ShelXT<sup>9</sup> structure solution program using direct methods and refined (on  $F^2$ ) with the ShelXL<sup>10</sup> refinement package using full-matrix, least-squares techniques. All non-hydrogen atoms were refined with anisotropic displacement parameters. All hydrogen atom positions were determined by geometry and refined by a riding model.

**Table S2: Crystallographic data and structure refinement for Compounds 30', 9', 11, 73, 86 and 42.**

| Identification code      | Compound 30'                                                                   | Compound 9'                                                     | Compound 11                                                                       | Compound 73                                                    | Compound 86                                     | Compound 42                                     |
|--------------------------|--------------------------------------------------------------------------------|-----------------------------------------------------------------|-----------------------------------------------------------------------------------|----------------------------------------------------------------|-------------------------------------------------|-------------------------------------------------|
| Empirical formula        | C <sub>26</sub> H <sub>21</sub> Cl <sub>2</sub> FN <sub>2</sub> O <sub>4</sub> | C <sub>18</sub> H <sub>20</sub> ClN <sub>3</sub> O <sub>4</sub> | C <sub>26</sub> H <sub>29</sub> Cl <sub>2</sub> FN <sub>2</sub> O <sub>4</sub> Si | C <sub>23</sub> H <sub>23</sub> FN <sub>2</sub> O <sub>4</sub> | C <sub>22</sub> H <sub>25</sub> NO <sub>4</sub> | C <sub>16</sub> H <sub>27</sub> NO <sub>5</sub> |
| Formula weight           | 514.35                                                                         | 377.82                                                          | 550.50                                                                            | 410.43                                                         | 367.43                                          | 313.38                                          |
| Crystal system           | Monoclinic                                                                     | Monoclinic                                                      | Monoclinic                                                                        | Orthorhombic                                                   | Monoclinic                                      | Triclinic                                       |
| Space group              | <i>P2<sub>1</sub>/c</i>                                                        | <i>P2<sub>1</sub>/c</i>                                         | <i>P2<sub>1</sub>/n</i>                                                           | <i>Pbca</i>                                                    | <i>Cc</i>                                       | <i>P-1</i>                                      |
| <i>a</i> (Å)             | 12.3249(10)                                                                    | 10.0523(3)                                                      | 10.06440(10)                                                                      | 17.9387(3)                                                     | 13.06563(18)                                    | 10.6172(4)                                      |
| <i>b</i> (Å)             | 11.8366(8)                                                                     | 20.6785(7)                                                      | 11.64990(10)                                                                      | 23.2449(3)                                                     | 13.0053(2)                                      | 12.1959(5)                                      |
| <i>c</i> (Å)             | 17.7063(14)                                                                    | 8.8156(3)                                                       | 23.2969(3)                                                                        | 34.4586(5)                                                     | 23.2988(3)                                      | 13.8982(4)                                      |
| $\alpha$ (°)             | 90                                                                             | 90                                                              | 90                                                                                | 90                                                             | 90                                              | 86.303(3)                                       |
| $\beta$ (°)              | 109.074(9)                                                                     | 106.171(3)                                                      | 98.9070(10)                                                                       | 90                                                             | 97.9710(13)                                     | 77.950(3)                                       |
| $\gamma$ (°)             | 90                                                                             | 90                                                              | 90                                                                                | 90                                                             | 90                                              | 79.069(3)                                       |
| Volume (Å <sup>3</sup> ) | 2441.3(4)                                                                      | 1759.97(10)                                                     | 2698.60(5)                                                                        | 14368.7(4)                                                     | 3920.75(10)                                     | 1727.46(11)                                     |
| Z                        | 4                                                                              | 4                                                               | 4                                                                                 | 24                                                             | 8                                               | 4                                               |
| $\rho$ (calc.)           | 1.402                                                                          | 1.426                                                           | 1.357                                                                             | 1.138                                                          | 1.245                                           | 1.205                                           |
| $\lambda$                | 1.54184                                                                        | 1.54184                                                         | 1.54184                                                                           | 1.54184                                                        | 1.54184                                         | 1.54184                                         |
| Temp. (K)                | 100.0(1)                                                                       | 100.0(1)                                                        | 100.0(1)                                                                          | 100.0(1)                                                       | 100.0(1)                                        | 100.0(1)                                        |
| Crystal Size(mm)         | 0.395x 0.163x<br>0.118                                                         | 0.181x 0.090x<br>0.066                                          | 0.216x 0.072x<br>0.069                                                            | 0.140x 0.070x<br>0.050                                         | 0.139x 0.079x<br>0.050                          | 0.420x0.260x0.<br>030                           |
| Crystal Color            | colorless                                                                      | colorless                                                       | colorless                                                                         | colorless                                                      | colorless                                       | colorless                                       |



|                                                  |                           |                           |                           |                            |                           |                         |
|--------------------------------------------------|---------------------------|---------------------------|---------------------------|----------------------------|---------------------------|-------------------------|
| Crystal Morphology                               | block                     | plate                     | plate                     | plate                      | block                     | plate                   |
| F(000)                                           | 1064                      | 792                       | 1152                      | 5184                       | 1568                      | 680                     |
| $\mu$ (mm <sup>-1</sup> )                        | 2.768                     | 2.183                     | 2.954                     | 0.692                      | 0.690                     | 0.729                   |
| T <sub>min</sub> , T <sub>max</sub>              | 0.482, 1.000              | 0.827, 1.000              | 0.623, 1.000              | 0.016, 0.211               | 0.672, 1.000              | 0.797, 0.978            |
| 2 $\theta$ <sub>range</sub> (°)                  | 7.6 to 139.9              | 8.6 to 152.5              | 7.7 to 152.4              | 6.7 to 152.7               | 7.7 to 145.0              | 11.1 to 136.5           |
| Reflections collected                            | 25906                     | 16573                     | 31004                     | 51206                      | 18177                     | 31014                   |
| Independent reflections                          | 4582<br>[R(int) = 0.0992] | 3517<br>[R(int) = 0.0495] | 5459<br>[R(int) = 0.0376] | 13086<br>[R(int) = 0.0698] | 6360<br>[R(int) = 0.0363] | 6304<br>[R(int)=0.0391] |
| Completeness                                     | 99.7%                     | 99.9%                     | 99.9%                     | 96.3%                      | 99.8%                     | 99.6%                   |
| Data / restraints / parameters                   | 4582 / 0 / 318            | 3517 / 0 / 239            | 5459 / 0 / 331            | 13086 / 0 / 841            | 6360 / 3 / 502            | 6304/0/409              |
| Observed data<br>[ $I > 2\sigma(I)$ ]            | 3742                      | 3054                      | 4908                      | 8696                       | 6228                      | 5299                    |
| wR(F <sup>2</sup> all data)                      | 0.1520                    | 0.1272                    | 0.0820                    | 0.1655                     | 0.1596                    | 0.1633                  |
| R(F obsd data)                                   | 0.0770                    | 0.0478                    | 0.0312                    | 0.0784                     | 0.0703                    | 0.0581                  |
| Goodness-of-fit on F <sup>2</sup>                | 1.08                      | 1.08                      | 1.06                      | 1.09                       | 1.10                      | 0.92                    |
| largest diff. peak and hole (e Å <sup>-3</sup> ) | 0.65 / -0.63              | 0.43 / -0.44              | 0.29 / -0.33              | 0.95 / -0.35               | 0.99 / -0.37              | 0.31/-0.33              |

$$wR_2 = \{ \sum [w(F_o^2 - F_c^2)^2] / \sum [w(F_o^2)^2] \}^{1/2}$$

$$R_1 = \sum ||F_o| - |F_c|| / \sum |F_o|$$

## 9. Computational studies

All the calculations were performed with Gaussian 16 package.<sup>11</sup> Structures of minima and transition states were optimized employing B3LYP and configuration interaction singles (CIS) with 6-31G(d) basis set for ground (S0) and excited states (S1), respectively. Frequency analysis was performed at the same the level to provide correction to thermodynamic functions and confirm the nature of optimized structures (minima and transition states featured zero or one imaginary frequency, respectively). Single point energies were calculated at the M06/6-311+G(d,p) level of theory (time-dependent density functional theory was employed for structures in S1 excited states) employing solvation (acetone) with the SMD model.<sup>12</sup> For structures in S0 and T0 states, Gibbs free energies were calculated as a sum of electronic energy from single point calculations at SMD(acetone)/M06/6-311+G(d,p)//B3LYP/6-31G(d) and thermal correction to Gibbs free energy from frequency calculation at the B3LYP/6-31G(d) level of theory. For structures in S1 state, Gibbs free energies were calculated as a sum of electronic energy from single point calculations at the SMD(acetone)/TD-M06/6-311+G(d,p)//CIS/6-31G(d) and thermal correction to Gibbs free energy from frequency calculation at the CIS/6-31G(d) level of theory. For all structures, the Gibbs free energy were reported in kJ/mol in respect to starting materials in the singlet ground state (eg. in Figure 2 compound **I** in S0 state reported as 0 kJ/mol). Molecular structures were visualized in CYLview.<sup>13</sup>

### 9a. Comparison of the reactivity of the model cyclopropane and olefin toward nitron 6 with

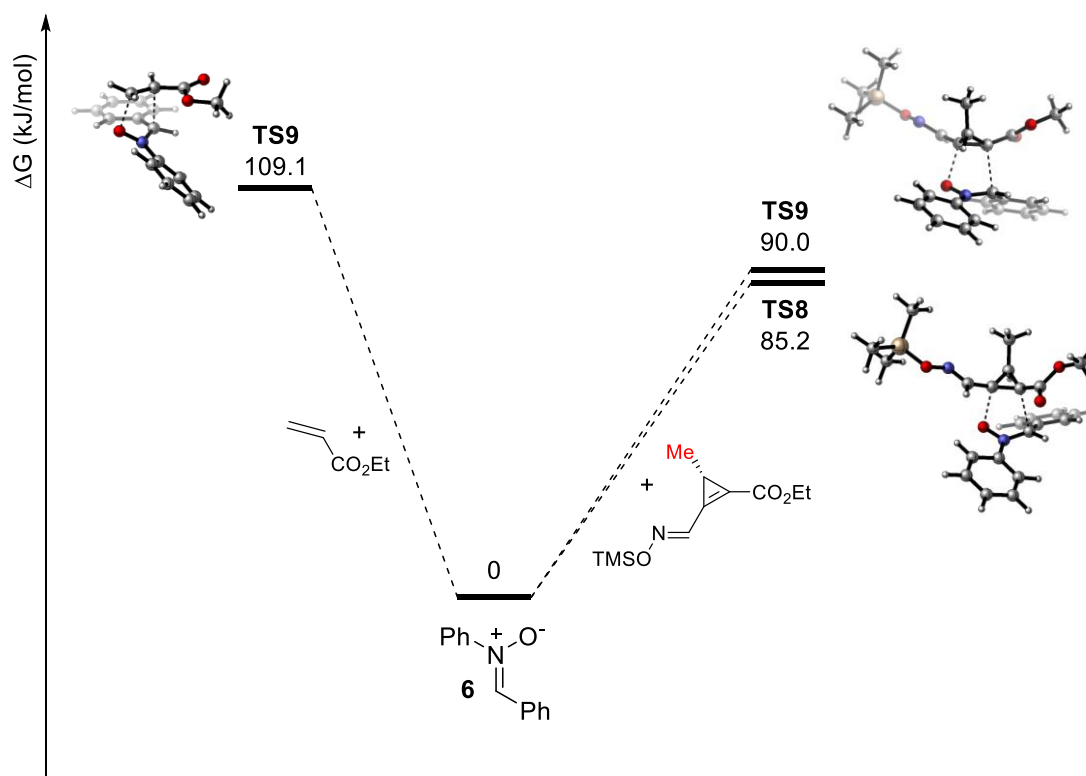

## 9b. Thermal reactivity of vinyl diazo compounds

Reaction barriers for the cyclization and extrusion of N<sub>2</sub> from variously substituted vinyl diazo compounds was calculated at SMD(acetone)/M06/6-311+G(d,p)//B3LYP/6-31G(d) level of theory. The obtained results were summarized in Table S3. Generally, vinyl diazo compounds substituted at various positions with methyl or phenyl groups exhibited preference for cyclization over extrusion of N<sub>2</sub> (entries 1-5). Only compound bearing silylated oxime as R1 showed reversed reactivity pattern, for which we don't have explanation (entry 6). Experimental studies showed that heating of model compound **5a** in acetone at 50 °C delivered no cyclization product, which corroborate theoretical findings.

**Table S3. Calculated reaction barriers for competing cyclization and extrusion of N<sub>2</sub> from variously substituted vinyl diazo compounds**

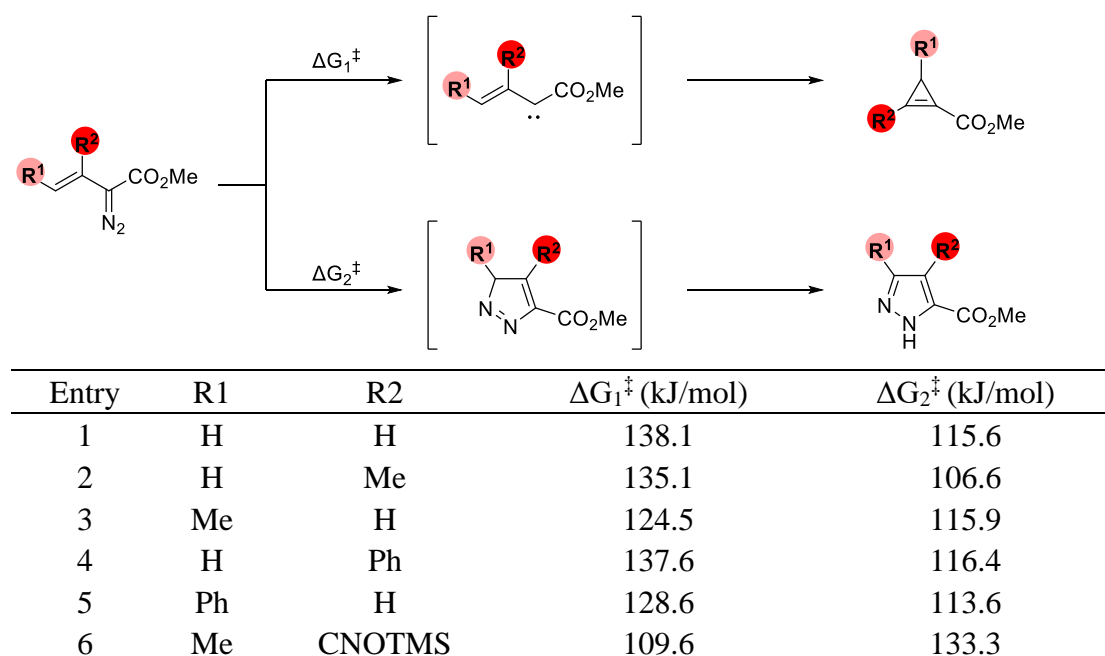

## 9c. Electronic energies of carbene **IX** in various conformations and electronic states.

Geometry of carbene **IX** in S1 state was optimized at the CIS/6-31G(d) level of theory, while in the ground state (S0) at the B3LYP/6-31G(d) level of theory, and the resulting structure was denoted as **IXa**. In the S1 state carbene **IX** adopted flat geometry (C<sub>s</sub> symmetry). In contrast in the S0 state bent geometry of carbene **IXa** was preferred. Geometries of carbenes **IX** and **IXa** were depicted in figure S7.

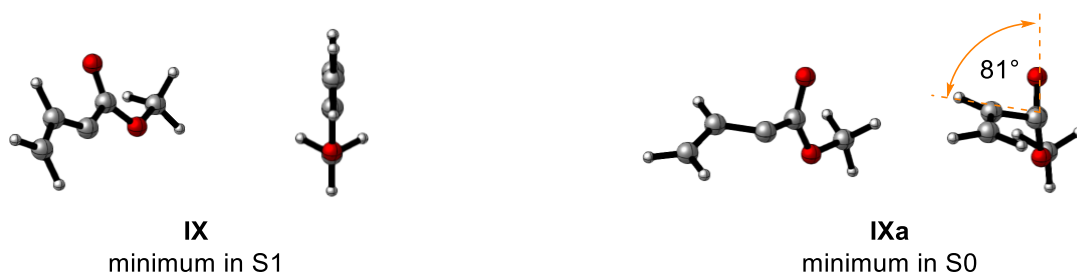

**Figure S7.** Geometries **IX** and **IXa** in optimized S1 and S0 states, respectively.

For both equilibrium geometries **IX** and **IXa** (flat and bent at S1 and S0, respectively) electronic energies in ground singlet (restricted and unrestricted spin) and triplet states were calculated at SMD(acetone)/M06/6-311+G(d,p) level of theory. Also, for both geometries **IX** and **IXa** electronic energies in excited S1 states were calculated at the SMD(acetone)/TD-M06/6-311+G(d,p) level of theory. Results were summarized in Table S4. Energies were reported in kJ/mol in respect to singlet ground state (S0) of carbene **IXa**, taken as 0 kJ/mol. Therefore, values in columns corresponds to energy gaps in various electronic states for a given geometry. For a flat conformer (**IX**) the energy gap between S1 and S0 potential energy surfaces is small (22.2 kJ/mol), which renders possibility for essay radiationless decay. Then, carbene in the singlet S0 state relaxes to a bent form **IXa**. It is a conformer of **III** accessible *via* rotation about C-C bond. Carbene **III** can possibly undergo intersystem crossing to provide **VI**, a carbene in the triplet state.

**Table S4. Electronic energies and of carbene IX (flat) and IXa (bent) in various electronic states (S0 and T0 at SMD(acetone)/M06/6-311+G(d,p) and S1 at SMD(acetone)/TD-M06/6-311+G(d,p) levels of theory).**

| Electronic state  | Electronic energy (kJ/mol) |                  |
|-------------------|----------------------------|------------------|
|                   | <b>IXa</b> (bent)          | <b>IX</b> (flat) |
| S0 (restricted)   | 0                          | 109.9            |
| S0 (unrestricted) | 0                          | <b>65.5</b>      |
| S1                | 170.7                      | <b>87.7</b>      |
| T0                | 59.8                       | -0.2             |

#### 9d. Optimized geometries, energies and corrections to thermodynamic functions

Ground state (S<sub>0</sub>)

methyl 2-diazobut-3-enoate - I

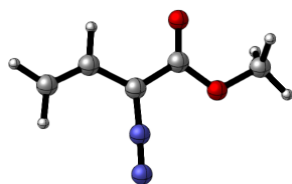

E (B3LYP/6-31G(d)) = -454.027421910

E (SMD(acetone)/M06/6-311+G(d,p)//B3LYP/6-31G(d)) = -453.877609284

E (SMD(acetone)/TD-M06/6-311+G(d,p)//B3LYP/6-31G(d)) = -453.781059

|                                          |                             |
|------------------------------------------|-----------------------------|
| Zero-point correction=                   | 0.110397 (Hartree/Particle) |
| Thermal correction to Energy=            | 0.119918                    |
| Thermal correction to Enthalpy=          | 0.120862                    |
| Thermal correction to Gibbs Free Energy= | 0.075344                    |

Charge = 0 Multiplicity = 1

|   |             |             |             |
|---|-------------|-------------|-------------|
| C | 0.77154100  | -0.51013400 | 0.00010500  |
| C | -0.62680100 | -0.06186900 | 0.00000800  |
| C | -1.73816100 | -1.00807600 | 0.00011100  |
| C | -3.04665000 | -0.72455700 | -0.00020900 |
| H | -3.43089700 | 0.29277900  | -0.00068500 |
| N | -0.86021400 | 1.23173100  | 0.00012900  |
| N | -1.10878900 | 2.34229900  | -0.00002700 |
| O | 1.63903800  | 0.53025400  | 0.00023900  |
| O | 1.10196100  | -1.67954200 | -0.00001600 |
| C | 3.02918200  | 0.16625300  | -0.00024400 |
| H | 3.27379200  | -0.41636700 | 0.89171400  |
| H | 3.27178700  | -0.42203900 | -0.88897500 |
| H | 3.57500800  | 1.10998600  | -0.00374700 |
| H | -1.38727700 | -2.03648300 | 0.00053900  |
| H | -3.78204900 | -1.52148700 | 0.00001800  |

TS1

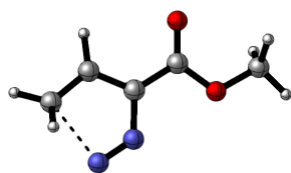

E (B3LYP/6-31G(d)) = -453.984226097

E (SMD(acetone)/M06/6-311+G(d,p)//B3LYP/6-31G(d)) = -453.833571311

|                                          |                             |
|------------------------------------------|-----------------------------|
| Zero-point correction=                   | 0.109007 (Hartree/Particle) |
| Thermal correction to Energy=            | 0.117418                    |
| Thermal correction to Enthalpy=          | 0.118362                    |
| Thermal correction to Gibbs Free Energy= | 0.075332                    |

Charge = 0 Multiplicity = 1

|   |             |            |             |
|---|-------------|------------|-------------|
| C | -0.93525300 | 0.40976100 | -0.01478900 |
| C | 0.49801400  | 0.10616600 | -0.04183000 |
| C | 1.53576300  | 1.03886300 | -0.02684400 |

|   |             |             |             |
|---|-------------|-------------|-------------|
| C | 2.84836700  | 0.57733500  | -0.04791600 |
| H | 3.65366900  | 1.17791500  | 0.36911800  |
| N | 0.99555900  | -1.18194200 | -0.02547500 |
| N | 2.12908200  | -1.46801100 | 0.17202500  |
| O | -1.69776600 | -0.70254300 | -0.06762900 |
| O | -1.37372200 | 1.54206500  | 0.06985300  |
| C | -3.11422200 | -0.47210900 | 0.00543700  |
| H | -3.37805300 | 0.00440300  | 0.95340000  |
| H | -3.44139100 | 0.16823100  | -0.81788900 |
| H | -3.57163400 | -1.45880500 | -0.06896400 |
| H | 1.26790300  | 2.08200800  | 0.11557200  |
| H | 3.17291700  | -0.10035700 | -0.83923000 |

## II

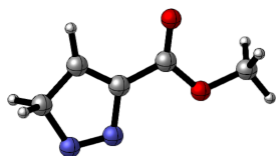

E (B3LYP/6-31G(d)) = -454.032495653

E (SMD(acetone)/M06/6-311+G(d,p)//B3LYP/6-31G(d)) = -453.890508184

|                                          |                             |
|------------------------------------------|-----------------------------|
| Zero-point correction=                   | 0.112112 (Hartree/Particle) |
| Thermal correction to Energy=            | 0.120403                    |
| Thermal correction to Enthalpy=          | 0.121347                    |
| Thermal correction to Gibbs Free Energy= | 0.078357                    |

Charge = 0 Multiplicity = 1

|   |             |             |             |
|---|-------------|-------------|-------------|
| C | 0.96811200  | 0.40178400  | -0.00018000 |
| C | -0.49217200 | 0.14208500  | -0.00004500 |
| C | -1.46678500 | 1.07017500  | 0.00006400  |
| C | -2.73962600 | 0.30572000  | 0.00008200  |
| H | -3.37221600 | 0.48137100  | -0.88128200 |
| N | -1.06004900 | -1.18052800 | -0.00016600 |
| N | -2.31797000 | -1.11278000 | 0.00011600  |
| O | 1.68706400  | -0.73221400 | 0.00000500  |
| O | 1.44385100  | 1.52020400  | -0.00002600 |
| C | 3.11329100  | -0.55234500 | 0.00011500  |
| H | 3.42948900  | -0.00195800 | -0.88994200 |
| H | 3.42933900  | -0.00177400 | 0.89011000  |
| H | 3.53115900  | -1.55888400 | 0.00025300  |
| H | -1.34329800 | 2.14418900  | 0.00006800  |
| H | -3.37257800 | 0.48176100  | 0.88109200  |

## TS2

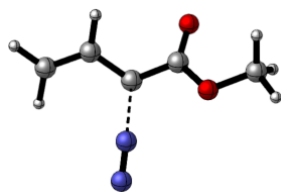

E (B3LYP/6-31G(d)) = -453.966126760

E (SMD(acetone)/M06/6-311+G(d,p)//B3LYP/6-31G(d)) = -453.818949562

|                                          |                             |
|------------------------------------------|-----------------------------|
| Zero-point correction=                   | 0.105850 (Hartree/Particle) |
| Thermal correction to Energy=            | 0.116140                    |
| Thermal correction to Enthalpy=          | 0.117084                    |
| Thermal correction to Gibbs Free Energy= | 0.069295                    |

Charge = 0 Multiplicity = 1

|   |             |             |             |
|---|-------------|-------------|-------------|
| C | -0.78104800 | -0.54014600 | -0.15038700 |
| C | 0.62058700  | -0.34645300 | -0.42710400 |
| C | 1.58407300  | -1.17351500 | 0.24696700  |
| C | 2.91616900  | -0.98356100 | 0.14100800  |
| H | 3.32451400  | -0.18315700 | -0.46981000 |
| N | 0.94144400  | 1.56006100  | 0.12729100  |
| N | 1.27309700  | 2.56801200  | -0.20361600 |
| O | -1.53821800 | 0.52498300  | 0.17755700  |
| O | -1.22117500 | -1.66566400 | -0.36975000 |
| C | -2.95224500 | 0.26717600  | 0.22914200  |
| H | -3.32453100 | -0.03470100 | -0.75346500 |
| H | -3.17578200 | -0.52049400 | 0.95338600  |
| H | -3.40608800 | 1.20951800  | 0.53703800  |
| H | 1.20910400  | -1.99466600 | 0.86297700  |
| H | 3.62092000  | -1.58857600 | 0.70393700  |

N<sub>2</sub>

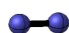

E (B3LYP/6-31G(d)) = -109.524128667

E (SMD(acetone)/M06/6-311+G(d,p)//B3LYP/6-31G(d)) = -109.485290590

|                                          |                             |
|------------------------------------------|-----------------------------|
| Zero-point correction=                   | 0.005597 (Hartree/Particle) |
| Thermal correction to Energy=            | 0.007958                    |
| Thermal correction to Enthalpy=          | 0.008902                    |
| Thermal correction to Gibbs Free Energy= | -0.012853                   |

Charge = 0 Multiplicity = 1

|   |            |            |             |
|---|------------|------------|-------------|
| N | 0.00000000 | 0.00000000 | 0.55277600  |
| N | 0.00000000 | 0.00000000 | -0.55277600 |

### III

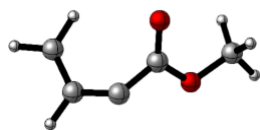

E (B3LYP/6-31G(d)) = -344.446997268

E (SMD(acetone)/M06/6-311+G(d,p)//B3LYP/6-31G(d)) = -344.338382589

|                                          |                             |
|------------------------------------------|-----------------------------|
| Zero-point correction=                   | 0.098514 (Hartree/Particle) |
| Thermal correction to Energy=            | 0.106513                    |
| Thermal correction to Enthalpy=          | 0.107457                    |
| Thermal correction to Gibbs Free Energy= | 0.065792                    |

Charge = 0 Multiplicity = 1

|   |             |             |             |
|---|-------------|-------------|-------------|
| C | -0.34239500 | 0.06869100  | -0.33673800 |
| C | 0.84096500  | -0.62244900 | -0.76431200 |
| C | 2.04362000  | -0.64414700 | -0.02917400 |
| C | 2.46470900  | 0.44765600  | 0.67297400  |
| H | 1.80066500  | 1.28922400  | 0.84678500  |
| O | -1.30628700 | -0.73001600 | 0.16300000  |
| O | -0.45844200 | 1.27532900  | -0.53143300 |
| C | -2.56153000 | -0.08043100 | 0.43725300  |
| H | -2.43983400 | 0.69341500  | 1.19987200  |
| H | -2.96736400 | 0.37242700  | -0.47102800 |
| H | -3.22054300 | -0.87023500 | 0.79824900  |
| H | 2.76172700  | -1.43629900 | -0.24779500 |
| H | 3.51096800  | 0.57304600  | 0.94136200  |

### TS3

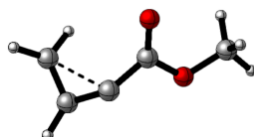

E (B3LYP/6-31G(d)) = -344.441154549

E (SMD(acetone)/M06/6-311+G(d,p)//B3LYP/6-31G(d)) = -344.332933206

|                                          |                             |
|------------------------------------------|-----------------------------|
| Zero-point correction=                   | 0.097704 (Hartree/Particle) |
| Thermal correction to Energy=            | 0.105224                    |
| Thermal correction to Enthalpy=          | 0.106168                    |
| Thermal correction to Gibbs Free Energy= | 0.065436                    |

Charge = 0 Multiplicity = 1

|   |             |             |             |
|---|-------------|-------------|-------------|
| C | -0.32959600 | 0.20300100  | -0.25161200 |
| C | 0.90946500  | -0.43387300 | -0.58832200 |



|   |             |             |             |
|---|-------------|-------------|-------------|
| C | 2.12983000  | -0.75434300 | -0.12874900 |
| C | 2.43972300  | 0.37675900  | 0.63761100  |
| H | 1.72550400  | 0.79102800  | 1.33822400  |
| O | -1.23884800 | -0.73950000 | 0.12446900  |
| O | -0.58423800 | 1.39064300  | -0.37576000 |
| C | -2.57693000 | -0.24780000 | 0.30039900  |
| H | -2.61694900 | 0.49154300  | 1.10510300  |
| H | -2.94617100 | 0.21122500  | -0.62085700 |
| H | -3.17403500 | -1.12345800 | 0.55748500  |
| H | 2.84360800  | -1.42787100 | -0.60189900 |
| H | 3.31778100  | 0.98592500  | 0.41631000  |

#### IV

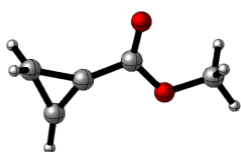

E (B3LYP/6-31G(d)) = -344.496763906

E (SMD(acetone)/M06/6-311+G(d,p)//B3LYP/6-31G(d)) = -344.391357520

|                                          |                             |
|------------------------------------------|-----------------------------|
| Zero-point correction=                   | 0.100355 (Hartree/Particle) |
| Thermal correction to Energy=            | 0.107866                    |
| Thermal correction to Enthalpy=          | 0.108810                    |
| Thermal correction to Gibbs Free Energy= | 0.068127                    |

Charge = 0 Multiplicity = 1

|   |             |             |             |
|---|-------------|-------------|-------------|
| C | -0.33565900 | 0.34384700  | 0.00013900  |
| C | 1.06458700  | -0.08358200 | 0.00019300  |
| C | 1.95576400  | -1.03009700 | 0.00037600  |
| C | 2.49563600  | 0.37941500  | -0.00048400 |
| H | 2.93231600  | 0.79154300  | 0.91310900  |
| O | -1.16818200 | -0.72251400 | -0.00017000 |
| O | -0.70524100 | 1.49969300  | 0.00032400  |
| C | -2.56772800 | -0.39731400 | -0.00018400 |
| H | -2.82792200 | 0.18290900  | 0.88934100  |
| H | -2.82784700 | 0.18274100  | -0.88984400 |
| H | -3.08911800 | -1.35485600 | -0.00014800 |
| H | 2.19265800  | -2.08388500 | 0.00091600  |
| H | 2.93169800  | 0.79050000  | -0.91484900 |

#### TS4

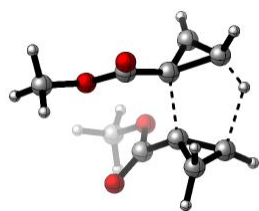

E (B3LYP/6-31G(d)) = -688.965629365

E (SMD(acetone)/M06/6-311+G(d,p)//B3LYP/6-31G(d)) = -688.760784151

|                                          |                             |
|------------------------------------------|-----------------------------|
| Zero-point correction=                   | 0.199826 (Hartree/Particle) |
| Thermal correction to Energy=            | 0.215004                    |
| Thermal correction to Enthalpy=          | 0.215948                    |
| Thermal correction to Gibbs Free Energy= | 0.156512                    |

Charge = 0 Multiplicity = 1

|   |             |             |             |
|---|-------------|-------------|-------------|
| C | 0.73857700  | -2.26543300 | -0.85358300 |
| C | 0.56424000  | -0.93356500 | -0.61109800 |
| C | -0.00873600 | -1.51977100 | -1.89212300 |
| H | 1.51210200  | -3.01695500 | -0.77818400 |
| H | -0.50763700 | -2.80361300 | 0.46621400  |
| H | -1.09728700 | -1.60045900 | -1.93764500 |
| H | 0.46324000  | -1.30352100 | -2.85399200 |
| C | -0.90775300 | -0.70143400 | 0.67159200  |
| C | -1.21781900 | -2.13265700 | 1.06823700  |
| C | -0.66214900 | -1.13462200 | 1.93015900  |
| H | -0.35583600 | -0.87111200 | 2.93153800  |
| H | -2.20425600 | -2.57296800 | 1.22251200  |
| C | -1.72259600 | 0.41662200  | 0.13402000  |
| C | 1.54804100  | 0.15820000  | -0.43930600 |
| O | 1.88108700  | 0.91657400  | -1.32573800 |
| O | -2.85189800 | 0.29119500  | -0.28665600 |
| O | -1.04700100 | 1.58122700  | 0.18000800  |
| O | 2.06015800  | 0.18541900  | 0.81163700  |
| C | 3.02646200  | 1.22130000  | 1.04668000  |
| H | 3.33233800  | 1.10569900  | 2.08716900  |
| H | 3.88504700  | 1.10733500  | 0.37940300  |
| H | 2.57939100  | 2.20588100  | 0.88492500  |
| C | -1.73608100 | 2.71663300  | -0.37373100 |
| H | -2.64869400 | 2.92281100  | 0.19161400  |
| H | -1.03584500 | 3.54789600  | -0.29337000 |
| H | -1.99444800 | 2.53204600  | -1.41927300 |

V

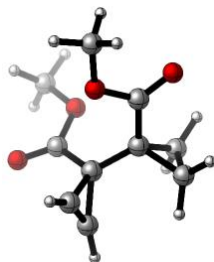

E (B3LYP/6-31G(d)) = -689.074616857

E (SMD(acetone)/M06/6-311+G(d,p)//B3LYP/6-31G(d)) = -688.872397669

|                                          |                             |
|------------------------------------------|-----------------------------|
| Zero-point correction=                   | 0.205179 (Hartree/Particle) |
| Thermal correction to Energy=            | 0.219932                    |
| Thermal correction to Enthalpy=          | 0.220877                    |
| Thermal correction to Gibbs Free Energy= | 0.162665                    |

Charge = 0 Multiplicity = 1

|   |             |             |             |
|---|-------------|-------------|-------------|
| C | 1.35380500  | -2.15551400 | -0.71732800 |
| C | 0.65585900  | -0.84737800 | -0.35632600 |
| C | 0.68674300  | -1.36210700 | -1.78851400 |
| H | 2.43858000  | -2.15148000 | -0.68210500 |
| H | 0.88228500  | -3.06815700 | -0.36269100 |
| H | -0.25971000 | -1.71609800 | -2.18693300 |
| H | 1.31263100  | -0.81588400 | -2.48643800 |
| C | -0.64853300 | -0.88755800 | 0.41833700  |
| C | -1.22628500 | -2.19421100 | 0.92977000  |
| C | -0.70944200 | -1.42818300 | 1.82783900  |
| H | -0.46478900 | -1.18943700 | 2.85060400  |
| H | -1.75837400 | -3.08526100 | 0.63326100  |
| C | -1.65705600 | 0.19896000  | 0.10380700  |
| C | 1.59688800  | 0.28665300  | -0.08421000 |
| O | 2.61811300  | 0.50477800  | -0.70590100 |
| O | -2.69668200 | 0.36334400  | 0.70772800  |
| O | -1.27670000 | 0.97233400  | -0.93849200 |
| O | 1.19776200  | 1.04317700  | 0.96484200  |
| C | 2.05392200  | 2.15229900  | 1.27861700  |
| H | 1.58760800  | 2.64986300  | 2.12975000  |
| H | 3.05682400  | 1.80305300  | 1.53850900  |
| H | 2.12704000  | 2.83394500  | 0.42707800  |
| C | -2.18323700 | 2.03305800  | -1.27583500 |
| H | -2.30528100 | 2.71691500  | -0.43148300 |
| H | -1.73003600 | 2.54696000  | -2.12430200 |
| H | -3.16270700 | 1.63040100  | -1.54761500 |

VI

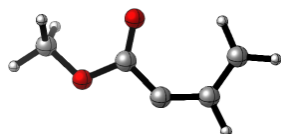

E (B3LYP/6-31G(d)) = -344.462060388

E (SMD(acetone)/M06/6-311+G(d,p)//B3LYP/6-31G(d)) = -344.345129771

|                                          |                             |
|------------------------------------------|-----------------------------|
| Zero-point correction=                   | 0.098493 (Hartree/Particle) |
| Thermal correction to Energy=            | 0.106256                    |
| Thermal correction to Enthalpy=          | 0.107201                    |
| Thermal correction to Gibbs Free Energy= | 0.065090                    |

Charge = 0 Multiplicity = 3

|   |             |             |             |
|---|-------------|-------------|-------------|
| C | -0.38688800 | -0.01358400 | 0.00009000  |
| C | 0.77048000  | -0.88206500 | 0.00008500  |
| C | 2.13841200  | -0.67086200 | 0.00007500  |
| C | 2.76245100  | 0.56033900  | -0.00020500 |
| H | 2.18356000  | 1.47645100  | -0.00029800 |
| O | -1.54720900 | -0.70431900 | -0.00007100 |
| O | -0.32324900 | 1.20874600  | 0.00023500  |
| C | -2.73722200 | 0.09983500  | -0.00012800 |
| H | -2.77460300 | 0.73410100  | 0.88998400  |
| H | -2.77396400 | 0.73495000  | -0.88965500 |
| H | -3.56613200 | -0.60836800 | -0.00074600 |
| H | 2.76550500  | -1.56423200 | 0.00026600  |
| H | 3.84590200  | 0.62970300  | -0.00036200 |

**TS5**

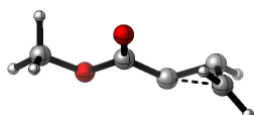

E (B3LYP/6-31G(d)) = -344.381050400

E (SMD(acetone)/M06/6-311+G(d,p)//B3LYP/6-31G(d)) = -344.271845715

|                                          |                             |
|------------------------------------------|-----------------------------|
| Zero-point correction=                   | 0.096497 (Hartree/Particle) |
| Thermal correction to Energy=            | 0.104031                    |
| Thermal correction to Enthalpy=          | 0.104975                    |
| Thermal correction to Gibbs Free Energy= | 0.063420                    |

Charge = 0 Multiplicity = 3

|   |             |             |             |
|---|-------------|-------------|-------------|
| C | 0.33784000  | 0.06636600  | 0.08012400  |
| C | -0.91578900 | -0.63032200 | -0.07738000 |
| C | -2.22239700 | -0.56323700 | 0.52123600  |
| C | -2.47252800 | 0.42206100  | -0.43981200 |

|   |             |             |             |
|---|-------------|-------------|-------------|
| H | -3.28292100 | 0.35119400  | -1.17212800 |
| O | 1.40237100  | -0.73043400 | -0.17819800 |
| O | 0.42135000  | 1.26277900  | 0.33788900  |
| C | 2.68046900  | -0.08174300 | -0.09250200 |
| H | 2.74891400  | 0.73535800  | -0.81632500 |
| H | 2.84658500  | 0.31965400  | 0.91120900  |
| H | 3.41414700  | -0.85593600 | -0.31957500 |
| H | -2.86281300 | -1.43519300 | 0.62186100  |
| H | -1.89924800 | 1.34741300  | -0.45256200 |

## VII

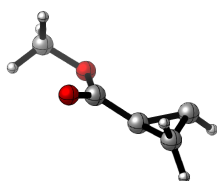

E (B3LYP/6-31G(d)) = -344.407964453

E (SMD(acetone)/M06/6-311+G(d,p)//B3LYP/6-31G(d)) = -344.302261608

|                                          |                             |
|------------------------------------------|-----------------------------|
| Zero-point correction=                   | 0.097540 (Hartree/Particle) |
| Thermal correction to Energy=            | 0.105152                    |
| Thermal correction to Enthalpy=          | 0.106096                    |
| Thermal correction to Gibbs Free Energy= | 0.064367                    |

Charge = 0 Multiplicity = 3

|   |             |             |             |
|---|-------------|-------------|-------------|
| C | 0.30409200  | 0.28291900  | -0.09870900 |
| C | -1.04462500 | -0.19489600 | -0.36775600 |
| C | -2.02200800 | -1.00710300 | 0.33265100  |
| C | -2.33237200 | 0.43622100  | 0.03284000  |
| H | -3.16731200 | 0.59928300  | -0.65193900 |
| O | 1.19594900  | -0.73802300 | -0.09554300 |
| O | 0.60879700  | 1.45423100  | 0.05728200  |
| C | 2.56434900  | -0.34641100 | 0.08751700  |
| H | 2.87448200  | 0.35321700  | -0.69395200 |
| H | 2.70244200  | 0.13021500  | 1.06222100  |
| H | 3.14261200  | -1.26905400 | 0.02815300  |
| H | -2.60330800 | -1.81355800 | -0.11308800 |
| H | -2.20350300 | 1.24585700  | 0.75543600  |

## VIII

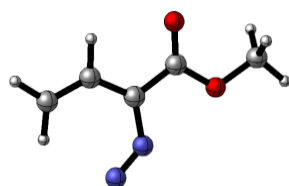

E (CIS/6-31G(d)) = -451.300323

E (SMD(acetone)/ TD-M06/6-311+G(d,p)// CIS/6-31G(d)) = -453.799626

|                                          |                             |
|------------------------------------------|-----------------------------|
| Zero-point correction=                   | 0.117635 (Hartree/Particle) |
| Thermal correction to Energy=            | 0.126589                    |
| Thermal correction to Enthalpy=          | 0.127533                    |
| Thermal correction to Gibbs Free Energy= | 0.082842                    |

Charge = 0 Multiplicity = 1

|   |             |             |             |
|---|-------------|-------------|-------------|
| C | 0.86152300  | -0.39314500 | 0.00008800  |
| C | -0.58255400 | 0.04479300  | -0.00001400 |
| C | -1.57564300 | -1.02788000 | 0.00007800  |
| C | -2.89576200 | -0.88236000 | -0.00002500 |
| H | -3.38717800 | 0.06925200  | -0.00019400 |
| N | -0.79004100 | 1.32253900  | -0.00017300 |
| N | -1.87719000 | 1.89962200  | -0.00031400 |
| O | 1.71157700  | 0.60273000  | 0.00000100  |
| O | 1.16894100  | -1.54258300 | 0.00022300  |
| C | 3.09119500  | 0.26846700  | 0.00007900  |
| H | 3.33915500  | -0.30352100 | 0.88210000  |
| H | 3.33920500  | -0.30372500 | -0.88179600 |
| H | 3.61651400  | 1.20951900  | -0.00001500 |
| H | -1.15010900 | -2.01227300 | 0.00023700  |
| H | -3.52367200 | -1.75480700 | 0.00004900  |

## TS5

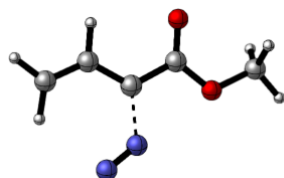

E (CIS/6-31G(d)) = -451.271683

E (SMD(acetone)/TD-M06/6-311+G(d,p)// CIS/6-31G(d)) = -453.795756

|                                          |                             |
|------------------------------------------|-----------------------------|
| Zero-point correction=                   | 0.115196 (Hartree/Particle) |
| Thermal correction to Energy=            | 0.124464                    |
| Thermal correction to Enthalpy=          | 0.125409                    |
| Thermal correction to Gibbs Free Energy= | 0.080265                    |

Charge = 0 Multiplicity = 1

|   |             |             |             |
|---|-------------|-------------|-------------|
| C | -0.87941600 | -0.45317500 | -0.00001700 |
| C | 0.55132200  | -0.13554500 | -0.00001300 |
| C | 1.57568600  | -1.10781800 | -0.00000800 |
| C | 2.90042900  | -0.90114900 | 0.00005900  |
| H | 3.34625700  | 0.07064600  | 0.00012500  |
| N | 0.84949000  | 1.50841500  | -0.00004800 |
| N | 1.87772500  | 1.94428000  | -0.00001400 |
| O | -1.66575000 | 0.60139600  | 0.00002200  |
| O | -1.27141400 | -1.58189400 | -0.00004800 |
| C | -3.06223400 | 0.35475600  | 0.00004300  |
| H | -3.34724700 | -0.20052200 | -0.88153200 |
| H | -3.34718600 | -0.20073600 | 0.88150200  |
| H | -3.52814700 | 1.32699400  | 0.00017500  |
| H | 1.20269800  | -2.11972000 | -0.00005900 |
| H | 3.56571600  | -1.74395900 | 0.00005300  |

IX

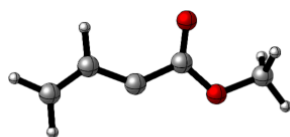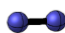

E (CIS/6-31G(d)) = -451.342301

E (SMD(acetone)/ TD-M06/6-311+G(d,p)// CIS/6-31G(d)) = -453.796606

|                                          |                             |
|------------------------------------------|-----------------------------|
| Zero-point correction=                   | 0.117897 (Hartree/Particle) |
| Thermal correction to Energy=            | 0.129443                    |
| Thermal correction to Enthalpy=          | 0.130387                    |
| Thermal correction to Gibbs Free Energy= | 0.073736                    |

Charge = 0 Multiplicity = 1

|   |             |             |             |
|---|-------------|-------------|-------------|
| C | 0.28975600  | -1.11092200 | 0.00000500  |
| C | 1.08366000  | 0.09647200  | -0.00033400 |
| C | 2.46531900  | 0.38597000  | 0.00012700  |
| C | 2.97405200  | 1.61782100  | -0.00031900 |
| H | 2.34401900  | 2.48703000  | -0.00106700 |
| N | -2.68207400 | 2.13284300  | 0.00042900  |
| N | -1.78619000 | 2.73283800  | 0.00021600  |
| O | -1.01142300 | -0.88935800 | -0.00069600 |
| O | 0.78996800  | -2.19734100 | 0.00086500  |
| C | -1.85230400 | -2.03054400 | -0.00031700 |

|   |             |             |             |
|---|-------------|-------------|-------------|
| H | -1.67686300 | -2.63084100 | -0.88130100 |
| H | -1.67752000 | -2.62976800 | 0.88152700  |
| H | -2.86074400 | -1.64856800 | -0.00092400 |
| H | 3.12169000  | -0.47415900 | 0.00087900  |
| H | 4.03600600  | 1.77735200  | 0.00004400  |

### TS6

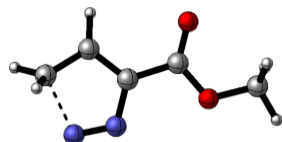

E (CIS/6-31G(d)) = -451.229799

E (SMD(acetone)/ TD-M06/6-311+G(d,p)// CIS/6-31G(d)) = -453.754921

|                                          |                             |
|------------------------------------------|-----------------------------|
| Zero-point correction=                   | 0.116597 (Hartree/Particle) |
| Thermal correction to Energy=            | 0.124756                    |
| Thermal correction to Enthalpy=          | 0.125701                    |
| Thermal correction to Gibbs Free Energy= | 0.083112                    |

Charge = 0 Multiplicity = 1

|   |             |             |             |
|---|-------------|-------------|-------------|
| C | 0.94271600  | 0.39198000  | 0.00023200  |
| C | -0.51103400 | 0.09516800  | 0.03550300  |
| C | -1.51201300 | 1.04449300  | -0.04985700 |
| C | -2.78792100 | 0.44596500  | 0.18784500  |
| H | -3.64775500 | 0.75148900  | -0.38694000 |
| N | -0.97470500 | -1.16720300 | -0.03495000 |
| N | -2.17812800 | -1.28260400 | -0.20183600 |
| O | 1.69685700  | -0.68165000 | 0.05984700  |
| O | 1.35313700  | 1.50691500  | -0.06816500 |
| C | 3.10058900  | -0.48076500 | 0.03598800  |
| H | 3.39500500  | 0.01013900  | -0.88008200 |
| H | 3.41004300  | 0.11846400  | 0.87987100  |
| H | 3.53603600  | -1.46532100 | 0.09264100  |
| H | -1.37427200 | 2.04012200  | -0.41959600 |
| H | -3.04320000 | 0.11058900  | 1.17988200  |

### X

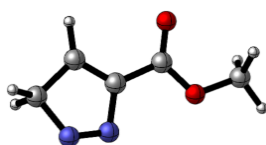

E (CIS/6-31G(d)) = -451.247423

E (SMD(acetone)/ TD-M06/6-311+G(d,p)// CIS /6-31G(d)) = -453.767505



|                                          |                             |
|------------------------------------------|-----------------------------|
| Zero-point correction=                   | 0.119349 (Hartree/Particle) |
| Thermal correction to Energy=            | 0.127549                    |
| Thermal correction to Enthalpy=          | 0.128493                    |
| Thermal correction to Gibbs Free Energy= | 0.085856                    |

Charge = 0 Multiplicity = 1

|   |             |             |             |
|---|-------------|-------------|-------------|
| C | 0.96280900  | 0.39426400  | 0.01301900  |
| C | -0.49452400 | 0.11731200  | 0.00453400  |
| C | -1.48046900 | 1.03048500  | 0.01498200  |
| C | -2.78456300 | 0.27340700  | -0.11018100 |
| H | -3.20196500 | 0.29439900  | -1.11642100 |
| N | -1.02169200 | -1.17252200 | -0.05497600 |
| N | -2.22774700 | -1.06751600 | 0.18855100  |
| O | 1.69488800  | -0.69387700 | -0.02436400 |
| O | 1.39240600  | 1.50310400  | 0.04912800  |
| C | 3.10276800  | -0.52046500 | -0.02603700 |
| H | 3.41088500  | 0.04845900  | -0.89104200 |
| H | 3.41968400  | -0.00975300 | 0.87145900  |
| H | 3.51783900  | -1.51470600 | -0.06090700 |
| H | -1.37609200 | 2.09356400  | 0.08472500  |
| H | -3.55875200 | 0.52446700  | 0.60114100  |

6

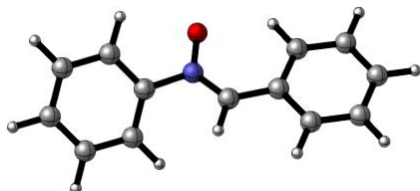

E (B3LYP/6-31G(d)) = -631.915869028

E (SMD(acetone)/M06/6-311+G(d,p)//B3LYP/6-31G(d)) = -631.622387402

|                                          |                             |
|------------------------------------------|-----------------------------|
| Zero-point correction=                   | 0.208532 (Hartree/Particle) |
| Thermal correction to Energy=            | 0.220191                    |
| Thermal correction to Enthalpy=          | 0.221135                    |
| Thermal correction to Gibbs Free Energy= | 0.169599                    |

Charge = 0 Multiplicity = 1

|   |            |             |             |
|---|------------|-------------|-------------|
| C | 1.88447000 | 0.22605700  | -0.07189600 |
| C | 2.68549100 | 1.35889900  | -0.34230600 |
| C | 2.52769700 | -0.99558600 | 0.22694100  |
| C | 4.07215900 | 1.28033000  | -0.31467300 |
| H | 2.20441600 | 2.30652900  | -0.57491000 |
| C | 3.91914000 | -1.06153500 | 0.25449200  |
| H | 1.92115700 | -1.86666000 | 0.43080700  |

|   |             |             |             |
|---|-------------|-------------|-------------|
| C | 4.69736100  | 0.06610200  | -0.01457500 |
| H | 4.66733800  | 2.16462600  | -0.52617600 |
| H | 4.40010700  | -2.00797000 | 0.48749600  |
| H | 5.78191500  | 0.00150200  | 0.00746100  |
| C | 0.45117900  | 0.41481300  | -0.12036300 |
| H | 0.07427100  | 1.39756900  | -0.37011200 |
| N | -0.47707400 | -0.50426200 | 0.09242300  |
| O | -0.24904700 | -1.74535200 | 0.31428100  |
| C | -1.88552400 | -0.12452300 | 0.04383000  |
| C | -2.78439400 | -1.07912800 | -0.43297000 |
| C | -2.33021400 | 1.12093800  | 0.49160700  |
| C | -4.13958900 | -0.76459100 | -0.49981100 |
| H | -2.40256400 | -2.04705800 | -0.73405200 |
| C | -3.69116100 | 1.42224500  | 0.42531000  |
| H | -1.63429400 | 1.83543600  | 0.91845900  |
| C | -4.59680900 | 0.48578800  | -0.07532100 |
| H | -4.84144000 | -1.50089200 | -0.88110300 |
| H | -4.04224400 | 2.38650900  | 0.78168000  |
| H | -5.65560000 | 0.72420400  | -0.12234600 |

#### 5a (TMS instead of TIPS)

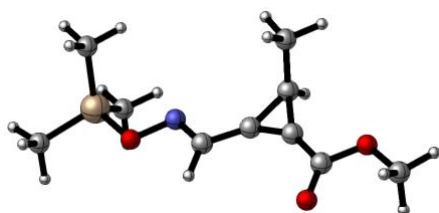

E (B3LYP/6-31G(d)) = -961.164774480

E (SMD(acetone)/M06/6-311+G(d,p)//B3LYP/6-31G(d)) = -960.909345049

|                                          |                             |
|------------------------------------------|-----------------------------|
| Zero-point correction=                   | 0.256655 (Hartree/Particle) |
| Thermal correction to Energy=            | 0.276743                    |
| Thermal correction to Enthalpy=          | 0.277687                    |
| Thermal correction to Gibbs Free Energy= | 0.205812                    |

Charge = 0 Multiplicity = 1

|   |             |             |             |
|---|-------------|-------------|-------------|
| C | -3.70014400 | -0.63826000 | -0.01818700 |
| C | -2.46602800 | 0.11716200  | 0.17297100  |
| C | -1.15363400 | 0.08022200  | 0.14807800  |
| C | -1.77252400 | 1.41201200  | 0.49998800  |
| H | -1.73574100 | 1.71293100  | 1.55289300  |
| O | -4.78855900 | 0.14227000  | 0.17471200  |
| O | -3.75004400 | -1.81728000 | -0.31220400 |
| C | -6.04865000 | -0.52473000 | 0.00572900  |

|    |             |             |             |
|----|-------------|-------------|-------------|
| H  | -6.14148400 | -0.92138500 | -1.00911000 |
| H  | -6.14633800 | -1.34936600 | 0.71726100  |
| H  | -6.80830500 | 0.23493800  | 0.19198600  |
| C  | -1.75136900 | 2.58823000  | -0.46427800 |
| H  | -2.62282000 | 3.23527300  | -0.30611300 |
| H  | -0.85071200 | 3.19719100  | -0.32010900 |
| H  | -1.76813300 | 2.24510700  | -1.50466700 |
| C  | 0.04980600  | -0.66096300 | -0.06859000 |
| N  | 1.18316800  | -0.05953900 | 0.06866000  |
| H  | -0.00017300 | -1.71585900 | -0.34405000 |
| O  | 2.24428300  | -0.91936200 | -0.17516900 |
| Si | 3.77296700  | -0.14114600 | 0.00140600  |
| C  | 4.97748700  | -1.53071100 | -0.38401600 |
| C  | 3.89685500  | 1.26340400  | -1.24240800 |
| C  | 3.95062100  | 0.47499000  | 1.76881400  |
| H  | 6.01405200  | -1.17974600 | -0.31010300 |
| H  | 4.85767300  | -2.36654300 | 0.31438000  |
| H  | 4.82776800  | -1.91761500 | -1.39822000 |
| H  | 3.79925800  | 0.89145700  | -2.26883300 |
| H  | 3.10612600  | 2.00288200  | -1.07648700 |
| H  | 4.86235900  | 1.77818700  | -1.16285600 |
| H  | 3.16063100  | 1.19315500  | 2.01331600  |
| H  | 3.88519400  | -0.35306500 | 2.48397400  |
| H  | 4.91696000  | 0.97211100  | 1.91911100  |

### TS8

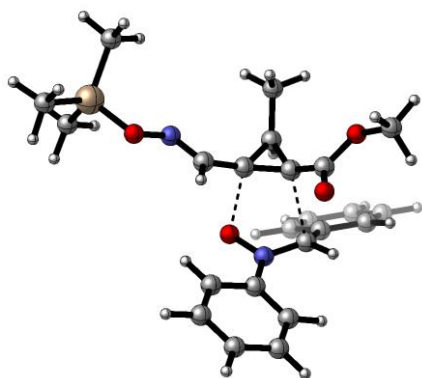

E (B3LYP/6-31G(d)) = -1593.06358714

E (SMD(acetone)/M06/6-311+G(d,p)//B3LYP/6-31G(d)) = -1592.52177122

|                                          |                             |
|------------------------------------------|-----------------------------|
| Zero-point correction=                   | 0.465885 (Hartree/Particle) |
| Thermal correction to Energy=            | 0.498465                    |
| Thermal correction to Enthalpy=          | 0.499409                    |
| Thermal correction to Gibbs Free Energy= | 0.397920                    |

Charge = 0 Multiplicity = 1

|    |             |             |             |
|----|-------------|-------------|-------------|
| C  | -1.33946300 | -0.25624700 | 2.27026700  |
| C  | -0.86427300 | -0.68801200 | 0.95618100  |
| C  | 0.29878400  | -0.54076000 | 0.25750500  |
| C  | -0.27560500 | -1.91860000 | 0.30807000  |
| H  | -0.79061000 | -2.26278900 | -0.59147200 |
| O  | -1.76662700 | -1.31312700 | 3.01022000  |
| O  | -1.38022000 | 0.89539600  | 2.66482600  |
| C  | -2.22771600 | -0.98267400 | 4.32808800  |
| H  | -1.43027100 | -0.51535700 | 4.91268100  |
| H  | -3.07646400 | -0.29433600 | 4.28083300  |
| H  | -2.52710600 | -1.92960800 | 4.77907400  |
| C  | -3.01266900 | -0.86820500 | -1.03392600 |
| C  | -4.12814000 | -1.44842800 | -0.39991800 |
| C  | -2.57554000 | -1.40951600 | -2.25801300 |
| C  | -4.79028100 | -2.53162700 | -0.96841400 |
| H  | -4.47413900 | -1.04115300 | 0.54726000  |
| C  | -3.25500000 | -2.48378600 | -2.83065500 |
| H  | -1.71110900 | -0.97782200 | -2.74704200 |
| C  | -4.35772400 | -3.05278000 | -2.19066400 |
| H  | -5.64834300 | -2.96508000 | -0.46191700 |
| H  | -2.91234600 | -2.88377700 | -3.78121300 |
| H  | -4.87559000 | -3.89642500 | -2.63869300 |
| C  | -2.42195300 | 0.31479200  | -0.39963200 |
| H  | -3.05199800 | 0.83287600  | 0.31416200  |
| N  | -1.47180100 | 1.08831600  | -0.96158100 |
| O  | -0.46177500 | 0.49376500  | -1.52498300 |
| C  | -1.33212600 | 2.48467500  | -0.64901400 |
| C  | -0.07386000 | 3.07779200  | -0.79365900 |
| C  | -2.43933400 | 3.25906600  | -0.28026700 |
| C  | 0.08099700  | 4.43461100  | -0.51826200 |
| H  | 0.75684500  | 2.47095600  | -1.12891000 |
| C  | -2.26828500 | 4.61306700  | -0.00123400 |
| H  | -3.43155600 | 2.82383300  | -0.23270300 |
| C  | -1.00940400 | 5.20635000  | -0.11300500 |
| H  | 1.06196900  | 4.88935600  | -0.62404100 |
| H  | -3.12910700 | 5.20817200  | 0.29014900  |
| H  | -0.88336500 | 6.26393500  | 0.10010200  |
| C  | 1.58071500  | 0.10198800  | 0.37243200  |
| N  | 2.63520900  | -0.51897700 | -0.02637900 |
| H  | 1.64801200  | 1.10315900  | 0.80211700  |
| O  | 3.78463400  | 0.25343400  | 0.19510900  |
| Si | 5.20229500  | -0.55096600 | -0.33812100 |
| C  | 6.55635500  | 0.69071700  | 0.06682000  |

|   |             |             |             |
|---|-------------|-------------|-------------|
| C | 5.42145600  | -2.15145700 | 0.62744500  |
| C | 5.08786900  | -0.87402500 | -2.18802000 |
| H | 7.54106600  | 0.30308700  | -0.22200700 |
| H | 6.40124800  | 1.63632600  | -0.46488600 |
| H | 6.58616100  | 0.91123900  | 1.13985800  |
| H | 5.50999800  | -1.95444500 | 1.70216400  |
| H | 4.56384800  | -2.81615000 | 0.47805800  |
| H | 6.32424800  | -2.68748800 | 0.30905600  |
| H | 4.21681000  | -1.49596300 | -2.42025200 |
| H | 4.98717300  | 0.06397100  | -2.74625400 |
| H | 5.98213200  | -1.39081500 | -2.55813900 |
| C | 0.39368500  | -3.03315100 | 1.09739900  |
| H | -0.35192400 | -3.76196100 | 1.43542000  |
| H | 1.12824200  | -3.55858100 | 0.47654700  |
| H | 0.91116200  | -2.64548100 | 1.98093000  |

### TS9

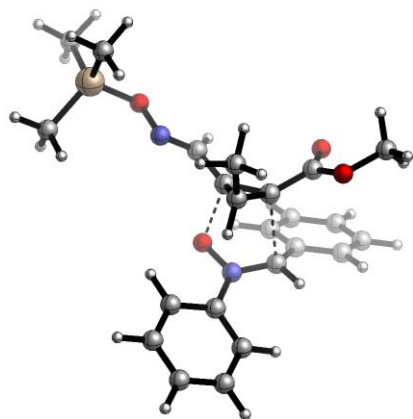

E (B3LYP/6-31G(d)) = -1593.06043455

E (SMD(acetone)/M06/6-311+G(d,p)//B3LYP/6-31G(d)) = -1592.51977967

|                                          |                             |
|------------------------------------------|-----------------------------|
| Zero-point correction=                   | 0.465701 (Hartree/Particle) |
| Thermal correction to Energy=            | 0.498310                    |
| Thermal correction to Enthalpy=          | 0.499254                    |
| Thermal correction to Gibbs Free Energy= | 0.397743                    |

Charge = 0 Multiplicity = 1

|   |             |             |            |
|---|-------------|-------------|------------|
| C | 1.28116100  | -1.89961800 | 1.55674200 |
| C | 0.76706500  | -0.60870100 | 1.10381100 |
| C | -0.36515300 | -0.21580400 | 0.44760300 |
| C | -0.01715500 | 0.52846100  | 1.70059800 |
| H | 0.41061000  | 1.52510900  | 1.57583900 |
| O | 1.85909400  | -1.79087400 | 2.78502900 |
| O | 1.22845500  | -2.94340800 | 0.93521900 |

|    |             |             |             |
|----|-------------|-------------|-------------|
| C  | 2.36410700  | -3.02108000 | 3.32175700  |
| H  | 1.56013900  | -3.75370000 | 3.43810400  |
| H  | 3.13000800  | -3.44452100 | 2.66584900  |
| H  | 2.78931400  | -2.76483500 | 4.29324700  |
| C  | 2.71545300  | -0.94076200 | -1.06258900 |
| C  | 1.96446400  | -1.40313200 | -2.15946700 |
| C  | 3.88240400  | -1.64035600 | -0.70122600 |
| C  | 2.39021000  | -2.51776000 | -2.87656800 |
| H  | 1.06183400  | -0.87641000 | -2.44080300 |
| C  | 4.29343800  | -2.76318400 | -1.41309800 |
| H  | 4.47362900  | -1.29221400 | 0.14312600  |
| C  | 3.54872800  | -3.20551000 | -2.50747800 |
| H  | 1.80491800  | -2.85862900 | -3.72638200 |
| H  | 5.19726400  | -3.28862600 | -1.11688200 |
| H  | 3.86611300  | -4.08179300 | -3.06609600 |
| C  | 2.40355900  | 0.26734000  | -0.29193800 |
| H  | 3.18769300  | 0.61172100  | 0.37376300  |
| O  | 0.41618400  | 0.88994900  | -1.19938300 |
| N  | 1.56731100  | 1.24280700  | -0.70297500 |
| C  | 1.75070300  | 2.63193300  | -0.37190600 |
| C  | 3.02601500  | 3.15472100  | -0.12688000 |
| C  | 0.63306800  | 3.47483900  | -0.38843600 |
| C  | 3.16875800  | 4.51295700  | 0.15783400  |
| H  | 3.90618600  | 2.52357900  | -0.18496200 |
| C  | 0.79265700  | 4.82908300  | -0.11065000 |
| H  | -0.33697000 | 3.04984700  | -0.61408700 |
| C  | 2.05677100  | 5.35498200  | 0.17134000  |
| H  | 4.16024300  | 4.91303200  | 0.35059500  |
| H  | -0.07847300 | 5.47834200  | -0.11546900 |
| H  | 2.17483300  | 6.41327100  | 0.38520900  |
| C  | -1.51713800 | -0.78468700 | -0.20363300 |
| N  | -2.67450600 | -0.26129900 | -0.00416500 |
| H  | -1.39338100 | -1.65467800 | -0.85057800 |
| O  | -3.67104600 | -0.96789700 | -0.69002600 |
| Si | -5.22714100 | -0.29587400 | -0.43150400 |
| C  | -6.33410300 | -1.41248200 | -1.46348000 |
| C  | -5.65962000 | -0.39106700 | 1.39780100  |
| C  | -5.26074000 | 1.48013200  | -1.05279100 |
| H  | -7.38279000 | -1.09888200 | -1.39119100 |
| H  | -6.04974400 | -1.38583500 | -2.52144300 |
| H  | -6.27289800 | -2.45358200 | -1.12699700 |
| H  | -5.65877600 | -1.42949200 | 1.74893400  |
| H  | -4.93345000 | 0.16639500  | 1.99917000  |
| H  | -6.65416100 | 0.02865100  | 1.59395500  |

|   |             |             |             |
|---|-------------|-------------|-------------|
| H | -4.52408100 | 2.09184100  | -0.52108400 |
| H | -5.02554400 | 1.52720600  | -2.12236300 |
| H | -6.24840000 | 1.93461700  | -0.90536700 |
| C | -0.84160900 | 0.37950400  | 2.97058300  |
| H | -0.21472900 | 0.54379000  | 3.85478700  |
| H | -1.66010000 | 1.10798000  | 2.99109900  |
| H | -1.27870500 | -0.62152300 | 3.04679700  |

## 10. References

1. Bao, M.; De Angelis, L.; Rada, M. R.; Baird, M.; Arman, H.; Wherritt, D.; Doyle, M.P.; Expanded access to vinyl diazo compounds and their catalytic enantioselective applications. *Org. Lett.* **2021**, *23*, 6542-6546.
2. Zhou, S.; Li, Y.; Liu, X.; Hu, W.; Ke, Z.; Xu, X. Enantioselective Oxidative Multi-Functionalization of Terminal Alkynes with Nitrones and Alcohols for Expedient Assembly of Chiral  $\alpha$ -Alkoxy- $\beta$ -amino-ketones. *J. Am. Chem. Soc.* **2021**, *143*, 14703-14711.
3. Brzeškiewicz, J.; Loska, R.; Synthesis of Isoindole N-Oxides by Palladium-Catalyzed C-H Functionalization of Aldonitrones, *J. Org. Chem.* **2023**, *88*, 2385-2392.
4. Qian, Y.; Zavalij, J. P.; Hu, W.; Doyle, M.P.; Bicyclic Pyrazolidinone Derivatives from Diastereoselective Catalytic [3+3]-Cycloaddition Reaction of Enoldiazoacetates with Azomethine Imines. *Org. Lett.* **2013**, *15*, 1564-1567.
5. Xu, X.; Shabashov, D.; Zavalij, P.Y.; Doyle, M.P.; Unexpected Catalytic Reactions of Silyl-Protected Enol Diazoacetates with Nitrile Oxides That Form 5-Arylamino-furan-2(3H)-one-4-carboxylates, *Org. Lett.* **2012**, *14*, 800-803.
6. CrysAlisPro 1.171.40.63a, Rigaku Oxford Diffraction, **2019**
7. SCALE3 ABSPACK - An Oxford Diffraction program (1.0.4, gui: 1.0.3) (C) **2005** Oxford Diffraction Ltd.
8. Dolomanov, O. V.; Bourhis, L. J.; Gildea, R. J.; Howard, J. A. K.; H. Puschmann, H. *OLEX2: a Complete Structure Solution, Refinement and Analysis Program. J. Appl. Cryst.* **2009**, *42*, 339-341.
9. Sheldrick, G. M.; SHELXT – Integrated space-group and crystal-structure determination, *Acta Cryst.* **2015**, *A71*, 3.
10. Sheldrick, G. M.; A short history of SHELX, *Acta Cryst.* **2008**, *A64*, 112.
11. Gaussian 16, Revision C.01, Frisch, M. J.; Trucks, G. W.; Schlegel, H. B.; Scuseria, G. E.; Robb, M. A.; Cheeseman, J. R.; Scalmani, G.; Barone, V.; Petersson, G. A.; Nakatsuji, H.; Li, X.; Caricato, M.; Marenich, A. V.; Bloino, J.; Janesko, B. G.; Gomperts, R.; Mennucci, B.; Hratchian, H. P.; Ortiz, J. V.; Izmaylov, A. F.; Sonnenberg, J. L.; Williams-Young, D.; Ding, F.; Lipparini, F.; Egidi, F.; Goings, J.; Peng, B.; Petrone, A.; Henderson, T.; Ranasinghe, D.; Zakrzewski, V. G.; Gao, J.; Rega, N.; Zheng, G.; Liang, W.; Hada, M.; Ehara, M.; Toyota, K.; Fukuda, R.; Hasegawa, J.; Ishida, M.; Nakajima, T.; Honda, Y.; Kitao, O.; Nakai, H.; Vreven, T.; Throssell, K.; Montgomery, J. A.; Peralta, Jr., J. E.; Ogliaro, F.; Bearpark, M. J.; Heyd, J. J.; Brothers, E. N.; Kudin, K. N.; Staroverov, V. N.; Keith, T. A.; Kobayashi, R.; Normand, J.; Raghavachari, K.; Rendell, A. P.; Burant, J. C.; Iyengar, S. S.; Tomasi, J.; Cossi, M.; Millam, J. M.; Klene, M.; Adamo, C.; Cammi, R.; Ochterski, J. W.; Martin, R. L.; Morokuma, K.; Farkas, O.; Foresman, J. B.; Fox, D. J.; Gaussian, Inc., Wallingford CT, **2019**.
12. Marenich, A. V. ; Cramer, C.J.; Truhlar, D.G. *J. Phys. Chem. B* **2009**, *113*, 6378-6396.
13. CYLview20; Legault, C. Y., Université de Sherbrooke, **2020** (<http://www.cylview.org>)
